# Supplementary material for: Discovery of a molecular glue promoting CDK12-DDB1 interaction to trigger cyclin K degradation
Source: eLife. 2020 Aug 17;9:e59994. doi: 10.7554/eLife.59994 (PMC7462607; doi:10.7554/eLife.59994)
Supplement: Figure 1—source data 1. [file elife-59994-fig1-data1.xlsx]

## Sheet: Figure 1B source data
	CellTiter-Glo (ATP)
HQ461 (M)	Rep 1	Rep 2	Rep 3
5e-05	24090	47250	18050
2.51e-05	65570	94080	92090
1.25e-05	146290	177880	172140
6.31e-06	173530	234990	251210
3.12e-06	360450	439670	341920
1.6e-06	1739950	1389760	1497990
7.99e-07	3976450	3598990	3163270
3.96e-07	3921070	3864190	3797240
2e-07	4812570	4792690	4784780
9.99e-08	3914290	3894720	3961470
4.8e-08	4680570	4337820	4057930
Figure 1-Source Data 1. Measurement of the HQ461 IC50 on the viability of A549 cells (Source data for Figure 1B).
