# Supplementary material for: Discovery of a molecular glue promoting CDK12-DDB1 interaction to trigger cyclin K degradation
Source: eLife. 2020 Aug 17;9:e59994. doi: 10.7554/eLife.59994 (PMC7462607; doi:10.7554/eLife.59994)
Supplement: Figure 1—source data 2. [file elife-59994-fig1-data2.xlsx]

## Sheet: Figure 1C
id	num	neg|score	neg|p-value	neg|fdr	neg|rank	neg|goodsgrna	neg|lfc	pos|score	pos|p-value	pos|fdr	pos|rank	pos|goodsgrna	pos|lfc
UBE2G1	4	1	1	1	19112	0	10.499	3.4277e-16	2.5903e-07	0.000495	1	4	10.499
DDB1	4	1	1	1	19111	0	10.252	4.0775e-15	2.5903e-07	0.000495	2	4	10.252
GLMN	4	1	1	1	19110	0	8.4402	1.2086e-13	2.5903e-07	0.000495	3	4	8.4402
RBX1	4	1	1	1	19109	0	6.4602	6.4905e-10	2.5903e-07	0.000495	4	4	6.4602
PSME4	4	1	1	1	19108	0	5.5826	9.5072e-10	2.5903e-07	0.000495	5	4	5.5826
CUL4B	4	1	1	1	19105	0	7.5186	2.2274e-09	2.5903e-07	0.000495	6	4	7.5186
DDA1	4	1	1	1	19107	0	5.8877	1.6342e-08	2.5903e-07	0.000495	7	4	5.8877
RPS24	4	1	1	1	19106	0	1.9236	3.1555e-08	2.5903e-07	0.000495	8	4	1.9236
NAA35	4	0.99858	0.99854	1	18849	0	5.6542	4.5385e-08	2.5903e-07	0.000495	9	3	5.6542
NAA30	4	1	1	1	19096	0	5.8856	5.0255e-08	2.5903e-07	0.000495	10	4	5.8856
NAA38	4	1	1	1	19104	0	5.4072	1.6006e-07	7.7708e-07	0.001238	11	4	5.4072
NAE1	4	1	1	1	19103	0	4.2026	1.6594e-07	7.7708e-07	0.001238	12	4	4.2026
UBE2M	4	0.99999	0.99999	1	19082	0	2.8398	2.4503e-07	1.2951e-06	0.001768	13	3	2.8398
RQCD1	4	1	1	1	19102	0	4.7747	2.7835e-07	1.2951e-06	0.001768	14	4	4.7747
TBC1D3C	4	1	1	1	19101	0	3.249	3.0569e-07	1.5542e-06	0.00198	15	4	3.249
CAND1	4	1	1	1	19100	0	3.9569	3.4743e-07	1.8132e-06	0.002166	16	4	3.9569
UTP6	4	1	1	1	19099	0	2.6816	3.7256e-07	2.3312e-06	0.002345	17	4	2.6816
RPS20	4	1	1	1	19098	0	2.174	3.8844e-07	2.3312e-06	0.002345	18	4	2.174
TNPO1	4	1	1	1	19097	0	3.6688	5.7719e-07	2.3312e-06	0.002345	19	4	3.6688
PPM1D	4	1	1	1	19095	0	2.764	1.16e-06	4.4034e-06	0.004208	20	4	2.764
NPLOC4	4	1	1	1	19094	0	2.6037	1.989e-06	6.4756e-06	0.005893	21	4	2.6037
PSMA7	4	0.14655	0.30772	0.972744	6039	1	3.9252	2.305e-06	7.5117e-06	0.006242	22	3	3.9252
CUL4A	4	1	1	1	19093	0	2.7914	2.3943e-06	7.5117e-06	0.006242	23	4	2.7914
RRP12	4	1	1	1	19092	0	1.7303	2.7292e-06	9.0659e-06	0.007219	24	4	1.7303
AK6	4	1	1	1	19091	0	2.7867	2.8639e-06	1.0102e-05	0.007723	25	4	2.7867
SSU72	4	1	1	1	19090	0	2.4163	3.0562e-06	1.1138e-05	0.007956	26	4	2.4163
NELFCD	4	1	1	1	19089	0	2.0287	3.0638e-06	1.1656e-05	0.007956	27	4	2.0287
ATXN7L3	4	1	1	1	19088	0	2.9849	3.2819e-06	1.1656e-05	0.007956	28	4	2.9849
RPL17_C18orf32	4	0.99985	0.99985	1	19015	0	2.5214	6.4482e-06	2.2017e-05	0.01451	29	3	2.5214
OTUB1	4	0.9596	0.95963	1	17638	0	4.4399	8.5814e-06	3.0306e-05	0.019307	30	3	4.4399
CPSF2	4	0.95692	0.95693	1	17576	0	3.1429	1.1622e-05	3.7559e-05	0.023156	31	3	3.1429
DDX5	4	0.99926	0.99927	1	18923	0	3.4972	1.2226e-05	4.0667e-05	0.024288	32	3	3.4972
CCDC86	4	0.99833	0.99831	1	18822	0	3.2127	1.3695e-05	4.3775e-05	0.025353	33	3	3.2127
PSMB5	4	0.93755	0.93764	1	17122	0	3.5485	1.8007e-05	5.569e-05	0.031305	34	3	3.5485
UBE2D3	4	0.99988	0.99988	1	19023	0	3.4603	1.943e-05	5.8281e-05	0.031825	35	3	3.4603
NOP56	4	0.93317	0.93338	1	17058	1	2.3023	2.2085e-05	6.916e-05	0.036716	36	3	2.3023
ASB3	4	0.98801	0.98802	1	18384	0	3.4349	2.6207e-05	8.0039e-05	0.041343	37	3	3.4349
FMNL1	4	0.98647	0.98642	1	18345	0	3.3889	2.7172e-05	8.3147e-05	0.041415	38	3	3.3889
LOC102724862	4	0.9998	0.9998	1	19009	0	2.6921	2.7852e-05	8.4701e-05	0.041415	39	3	2.6921
NPM1	4	0.98706	0.98701	1	18358	0	1.9584	2.9442e-05	8.8846e-05	0.041415	40	3	1.9584
UBA3	4	0.99999	0.99999	1	19084	0	2.1963	2.9442e-05	8.8846e-05	0.041415	41	3	2.1963
GTPBP4	4	0.87721	0.8915	1	16238	1	2.4727	3.4933e-05	0.00010542	0.047973	42	2	2.4727
SCD	3	0.078077	0.17824	0.899104	4199	1	2.9673	3.7321e-05	0.00011734	0.050968	43	2	2.9673
ZP1	4	0.99835	0.99834	1	18825	0	3.4095	3.8719e-05	0.00011527	0.050968	44	3	3.4095
FAM204A	4	0.99701	0.99703	1	18729	0	3.3806	4.1801e-05	0.00012459	0.052915	45	3	3.3806
MPHOSPH10	4	0.99965	0.99965	1	18978	0	2.7528	4.7479e-05	0.00013806	0.057361	46	3	2.7528
C19orf53	4	0.93385	0.93401	1	17068	1	2.4476	4.996e-05	0.0001422	0.057826	47	3	2.4476
PRKRIP1	4	0.99999	0.99998	1	19080	0	4.1789	5.2859e-05	0.00014998	0.059715	48	3	4.1789
CNOT4	4	0.9992	0.99921	1	18916	0	3.4401	5.4604e-05	0.00015671	0.061123	49	3	3.4401
SENP8	4	0.99729	0.99728	1	18752	0	3.7034	5.5931e-05	0.00016034	0.061287	50	3	3.7034
NOB1	4	0.93713	0.93723	1	17117	1	2.6642	5.7077e-05	0.00016396	0.061444	51	2	2.6642
LRRC37A3	4	0.9942	0.99424	1	18600	0	2.8187	6.3127e-05	0.0001852	0.068069	52	3	2.8187
H3F3B	4	0.9742	0.97435	1	18015	0	2.6937	6.5721e-05	0.00019297	0.069217	53	3	2.6937
TBC1D3F	4	0.99801	0.998	1	18801	0	2.8539	6.712e-05	0.00019608	0.069217	54	3	2.8539
PSMB7	4	0.99948	0.99949	1	18957	0	2.229	6.7826e-05	0.00019919	0.069217	55	3	2.229
CAD	4	0.99995	0.99995	1	19060	0	1.9126	7.6255e-05	0.00022509	0.076168	56	3	1.9126
MDM4	4	0.99971	0.99971	1	18992	0	2.7271	7.6913e-05	0.00022717	0.076168	57	3	2.7271
BPTF	4	0.99998	0.99998	1	19071	0	2.7516	8.3243e-05	0.00024582	0.081	58	3	2.7516
FCF1	4	0.99998	0.99998	1	19075	0	2.4625	8.6943e-05	0.0002541	0.082312	59	2	2.4625
SYMPK	4	0.71456	0.82188	1	14884	1	2.5834	8.9315e-05	0.00025928	0.082591	60	2	2.5834
RPL35	4	0.045717	0.13352	0.86614	2939	1	2.4743	9.2932e-05	0.0002712	0.08497	61	3	2.4743
VARS2	4	0.40677	0.60118	1	11027	1	2.0926	9.7304e-05	0.00028881	0.089029	62	3	2.0926
MS4A8	4	0.94186	0.94195	1	17217	0	3.0433	0.00010415	0.00030332	0.092016	63	3	3.0433
SREBF1	4	0.97158	0.97171	1	17943	0	2.2408	0.0001081	0.00031834	0.095065	64	3	2.2408
OR8J1	4	0.99955	0.99955	1	18969	0	2.8136	0.00011356	0.00033647	0.098485	65	3	2.8136
RPL19	4	0.99946	0.99947	1	18949	0	2.0269	0.00011478	0.0003401	0.098485	66	2	2.0269
ZNHIT3	4	0.98264	0.98267	1	18236	0	2.1634	0.00012549	0.00037222	0.106177	67	3	2.1634
UBTF	4	0.97844	0.97858	1	18129	0	2.7646	0.00013013	0.00038828	0.109129	68	2	2.7646
PSMG1	4	0.99998	0.99998	1	19074	0	3.2104	0.00014532	0.00043801	0.120137	69	3	3.2104
SMG1	4	0.93493	0.93508	1	17090	1	2.2337	0.00014667	0.00044319	0.120137	70	3	2.2337
MED21	4	0.99989	0.99989	1	19028	0	2.1854	0.00014853	0.0004463	0.120137	71	3	2.1854
CPSF3	4	0.11987	0.26733	0.951252	5357	1	1.8178	0.0001629	0.00048412	0.125611	72	2	1.8178
PSMA5	4	0.83052	0.86667	1	15741	1	1.8159	0.000164	0.00048723	0.125611	73	3	1.8159
RPS11	4	0.99963	0.99963	1	18973	0	1.6299	0.00016777	0.00049189	0.125611	74	2	1.6299
VCP	4	0.11987	0.26733	0.951252	5363	1	2.121	0.00016831	0.00049293	0.125611	75	3	2.121
WDR1	4	0.96736	0.96739	1	17846	0	2.6132	0.00017458	0.00051158	0.128648	76	3	2.6132
TBC1D3	4	0.99999	0.99999	1	19085	0	3.0577	0.00018737	0.00053903	0.133792	77	3	3.0577
RPS9	4	0.99943	0.99944	1	18943	0	1.0307	0.00019838	0.00057219	0.135008	78	3	1.0307
RPS25	4	0.99878	0.99877	1	18873	0	1.2931	0.00019838	0.00057219	0.135008	79	3	1.2931
RPS8	4	0.9239	0.92505	1	16912	1	1.2655	0.00019838	0.00057219	0.135008	80	3	1.2655
PWP2	4	0.99598	0.99597	1	18669	0	1.4226	0.00019838	0.00057219	0.135008	81	3	1.4226
IMP3	4	0.62385	0.76375	1	13869	1	1.8329	0.00020727	0.00059964	0.139509	82	3	1.8329
FAM50A	4	0.99892	0.99891	1	18891	0	2.759	0.00020971	0.00060586	0.139509	83	3	2.759
TTC25	4	0.99989	0.9999	1	19029	0	2.4586	0.0002187	0.00062969	0.14327	84	3	2.4586
FAU	4	0.94938	0.94943	1	17389	0	1.4795	0.00022659	0.00065041	0.146243	85	3	1.4795
MS4A4A	4	0.99999	0.99999	1	19087	0	2.695	0.0002447	0.00069756	0.15502	86	3	2.695
CRYBA1	4	0.99794	0.99794	1	18794	0	3.0526	0.0002538	0.00072812	0.156166	87	3	3.0526
USP9X	4	0.98311	0.98311	1	18247	0	2.2032	0.00025587	0.00073641	0.156166	88	3	2.2032
NAT10	4	0.95209	0.95215	1	17457	0	2.0945	0.00026188	0.0007504	0.156166	89	3	2.0945
SMG7	4	0.99995	0.99994	1	19056	0	2.7906	0.00026386	0.00075558	0.156166	90	3	2.7906
C7	4	0.51699	0.68236	1	12427	1	2.5218	0.00026786	0.00076542	0.156166	91	3	2.5218
KRT33B	4	0.99931	0.99932	1	18928	0	2.4059	0.00027165	0.00077319	0.156166	92	3	2.4059
CCT7	4	0.18781	0.36784	0.993484	7065	2	1.1507	0.00027572	0.00078614	0.156166	93	2	1.1507
PSME3	4	0.99721	0.99721	1	18744	0	2.8192	0.00027726	0.00078821	0.156166	94	3	2.8192
TGIF1	4	0.99999	0.99999	1	19086	0	2.2468	0.00027958	0.0007934	0.156166	95	3	2.2468
PSMB2	4	0.84528	0.87376	1	15875	1	1.7254	0.00028202	0.00080065	0.156166	96	2	1.7254
OR4D9	4	0.96511	0.96516	1	17780	0	2.877	0.00028243	0.0008022	0.156166	97	3	2.877
UNC119	4	0.9998	0.9998	1	19008	0	3.2987	0.00028504	0.00080894	0.156166	98	3	3.2987
ZNF594	4	0.84811	0.87522	1	15903	1	1.6571	0.00028506	0.00080894	0.156166	99	2	1.6571
CD6	4	0.99998	0.99998	1	19078	0	2.7152	0.00028819	0.0008193	0.156504	100	3	2.7152
IFITM3	4	0.99954	0.99955	1	18968	0	2.2672	0.00029083	0.00082707	0.156504	101	3	2.2672
NOL6	4	0.51224	0.6788	1	12371	1	1.7145	0.00030183	0.0008566	0.160386	102	3	1.7145
NUDC	4	0.73014	0.82693	1	14982	1	1.3755	0.00030524	0.00086437	0.160386	103	3	1.3755
TRMT112	4	0.99526	0.99526	1	18643	0	1.7129	0.00031293	0.00088354	0.160915	104	2	1.7129
KRTAP4_7	4	0.99992	0.99992	1	19040	0	2.6988	0.00031311	0.00088405	0.160915	105	3	2.6988
FUBP1	4	0.96512	0.96518	1	17781	0	2.8309	0.00034146	0.00096021	0.173127	106	3	2.8309
OR5T1	4	0.89317	0.90159	1	16461	1	2.6807	0.0003462	0.00097264	0.17373	107	3	2.6807
OR5I1	4	0.97482	0.97498	1	18031	0	2.4157	0.00035158	0.00098611	0.173812	108	3	2.4157
RNF8	4	0.54526	0.70355	1	12800	1	2.5123	0.00035364	0.00099129	0.173812	109	2	2.5123
PSMG2	4	0.99994	0.99993	1	19046	0	2.2335	0.00036588	0.0010322	0.179343	110	3	2.2335
RCL1	4	0.93131	0.93168	1	17024	1	2.0955	0.00037349	0.001056	0.180207	111	3	2.0955
PSMB3	4	0.99896	0.99895	1	18896	0	1.95	0.00037349	0.001056	0.180207	112	3	1.95
PHOSPHO2_KLHL23	4	0.73278	0.82782	1	15001	1	2.6008	0.0003937	0.0011068	0.186686	113	2	2.6008
RPL7	4	0.099781	0.23599	0.940804	4787	1	1.704	0.00039758	0.0011136	0.186686	114	3	1.704
UGT1A8	4	0.99993	0.99993	1	19045	0	2.6891	0.00040315	0.0011281	0.187473	115	3	2.6891
OR10V1	4	0.93596	0.93605	1	17101	1	2.563	0.00041209	0.001155	0.187911	116	3	2.563
CNOT11	4	0.99968	0.99968	1	18988	0	2.7077	0.00041443	0.0011617	0.187911	117	3	2.7077
OR1S1	4	0.99997	0.99997	1	19067	0	2.8641	0.00041644	0.0011674	0.187911	118	3	2.8641
MSTO1	4	0.93703	0.93713	1	17115	1	1.4702	0.00041772	0.00117	0.187911	119	2	1.4702
RPS19	4	0.99948	0.99949	1	18958	0	1.781	0.0004326	0.0011975	0.190718	120	2	1.781
SNRPD1	4	0.93654	0.9366	1	17106	1	0.16472	0.00044052	0.0012177	0.192333	121	1	0.16472
NUFIP2	4	0.99978	0.99978	1	19004	0	2.8569	0.00044509	0.0012286	0.192461	122	2	2.8569
KRTAP4_5	4	0.86196	0.88265	1	16064	1	1.8418	0.00045776	0.0012519	0.194518	123	2	1.8418
METTL16	4	0.93441	0.93458	1	17077	1	1.665	0.00048155	0.0013052	0.201174	124	2	1.665
POLR3B	4	0.043237	0.12717	0.861262	2806	2	-0.028929	0.00049123	0.0013234	0.202337	125	2	-0.028929
PSMA6	4	0.048391	0.14026	0.868092	3079	1	1.1068	0.00056837	0.0014632	0.2202	126	2	1.1068
RPL26	4	0.50192	0.6712	1	12232	1	1.0836	0.00056837	0.0014632	0.2202	127	2	1.0836
ADAMTSL1	4	0.80641	0.8558	1	15535	1	3.1031	0.00060863	0.0015275	0.227534	128	2	3.1031
NDUFS7	4	0.72129	0.82409	1	14912	1	2.5978	0.00062106	0.0015539	0.227534	129	2	2.5978
NSA2	4	0.99948	0.99949	1	18953	0	1.847	0.00062262	0.001556	0.227534	130	2	1.847
CD8B	4	0.35757	0.56566	1	10439	1	1.825	0.00062575	0.0015596	0.227534	131	2	1.825
INTS8	4	0.23622	0.43482	1	8251	1	1.7082	0.00063834	0.0015834	0.228058	132	2	1.7082
PSMA3	4	0.27768	0.48944	1	9214	1	2.0213	0.00064151	0.001587	0.228058	133	2	2.0213
FUT8	4	0.91287	0.91585	1	16739	1	1.83	0.00067198	0.001642	0.234188	134	2	1.83
PLA2G10	4	0.96063	0.96065	1	17658	0	1.4365	0.00070067	0.0016943	0.239861	135	2	1.4365
KAT7	4	0.84528	0.87376	1	15877	1	2.6696	0.00070648	0.0017078	0.23999	136	2	2.6696
ICE2	4	0.38773	0.58733	1	10799	2	0.87138	0.00073163	0.0017544	0.244742	137	2	0.87138
SLC25A20	4	0.19181	0.37355	0.993484	7170	1	2.6012	0.00080793	0.0018979	0.262843	138	2	2.6012
ERVFRD_1	4	0.12147	0.26978	0.954929	5392	1	2.8135	0.00087682	0.0020269	0.278688	139	2	2.8135
RAD51D	4	0.99764	0.99764	1	18778	0	2.0502	0.0009068	0.0020735	0.283062	140	2	2.0502
PRDX3	4	0.097095	0.23186	0.938594	4714	2	1.6696	0.00093889	0.0021377	0.289762	141	2	1.6696
TTC23L	4	0.96182	0.96185	1	17690	0	2.2112	0.0009932	0.0022289	0.299322	142	2	2.2112
PTPMT1	4	0.46213	0.64152	1	11725	2	0.57029	0.001047	0.0023336	0.299322	143	2	0.57029
RPL13	4	0.93537	0.93548	1	17092	1	1.3194	0.001047	0.0023336	0.299322	144	2	1.3194
RPL27A	4	0.14655	0.30772	0.972744	6030	1	0.97087	0.001047	0.0023336	0.299322	145	2	0.97087
PDCD2	4	0.98578	0.98575	1	18325	0	1.5107	0.001047	0.0023336	0.299322	146	2	1.5107
RPL27	4	0.99998	0.99998	1	19073	0	1.3008	0.001047	0.0023336	0.299322	147	2	1.3008
UTP15	4	0.68462	0.81125	1	14678	2	0.69932	0.001047	0.0023336	0.299322	148	2	0.69932
APLNR	4	0.99998	0.99998	1	19076	0	3.0663	0.0010836	0.0024087	0.306898	149	2	3.0663
DDX18	4	0.99792	0.99792	1	18793	0	2.2014	0.001096	0.0024356	0.307224	150	2	2.2014
RPS23	4	0.86155	0.8824	1	16055	1	1.1683	0.001114	0.0024724	0.30884	151	2	1.1683
ERH	3	0.99433	0.99443	1	18603	0	1.3379	0.0011315	0.0022776	0.299322	152	2	1.3379
RPS7	4	0.65969	0.79158	1	14335	1	1.3685	0.0011502	0.0025361	0.314742	153	2	1.3685
CNOT10	4	0.99638	0.9964	1	18692	0	2.4196	0.001195	0.0026128	0.322165	154	2	2.4196
NIFK	4	0.89904	0.90564	1	16533	1	0.91752	0.0012176	0.0026568	0.325495	155	1	0.91752
DUT	3	0.24548	0.39606	0.998651	8469	2	-0.39701	0.0012241	0.0024434	0.307224	156	1	-0.39701
XRCC3	4	0.92961	0.93007	1	16997	1	1.9269	0.0012297	0.0026807	0.326323	157	2	1.9269
ARL17A	4	0.8378	0.87014	1	15809	1	3.0033	0.0012694	0.0027553	0.333281	158	2	3.0033
TBC1D3K	4	0.99997	0.99997	1	19066	0	2.3468	0.0012916	0.0027936	0.335793	159	2	2.3468
MNT	4	0.99397	0.99401	1	18592	0	0.76637	0.0013211	0.0028459	0.339944	160	1	0.76637
ATAD3A	4	0.55731	0.71264	1	12970	1	1.2501	0.0013527	0.0028982	0.342287	161	2	1.2501
SLC22A8	4	0.99884	0.99883	1	18879	0	2.1911	0.001355	0.0029013	0.342287	162	2	2.1911
CRTC2	4	0.68855	0.81388	1	14716	1	0.98889	0.0013729	0.0029371	0.344378	163	1	0.98889
COPS6	4	0.0019506	0.0069484	0.53764	245	3	-3.1041	0.0014247	0.003035	0.352887	164	1	-3.1041
S100A5	4	0.25535	0.46031	1	8692	1	2.645	0.0014386	0.0030619	0.352887	165	2	2.645
KRT19	4	0.88753	0.89792	1	16374	1	2.6796	0.001441	0.003065	0.352887	166	2	2.6796
KIAA0391	4	0.017422	0.056225	0.775588	1380	2	0.069118	0.0015418	0.0032531	0.372295	167	2	0.069118
DNLZ	4	0.062175	0.17434	0.893038	3715	1	0.76984	0.00158	0.0033225	0.377976	168	1	0.76984
LOC101060389	4	0.98856	0.98856	1	18401	0	1.7135	0.0016711	0.0034981	0.393289	169	2	1.7135
ORC3	4	0.16219	0.33096	0.982998	6428	2	0.64967	0.0016813	0.0035147	0.393289	170	2	0.64967
SF3B3	4	0.91699	0.91917	1	16809	1	0.96967	0.0016836	0.0035189	0.393289	171	1	0.96967
MS4A15	4	0.99994	0.99994	1	19052	0	2.8597	0.0017377	0.0036256	0.402861	172	2	2.8597
NPIPB6	4	0.022435	0.070627	0.79398	1688	2	0.3314	0.0017871	0.003723	0.411292	173	2	0.3314
HHLA1	4	0.55708	0.71247	1	12964	2	1.6437	0.0018161	0.0037623	0.413253	174	2	1.6437
NAA20	4	0.9349	0.93504	1	17088	1	1.4115	0.0018613	0.0038447	0.419189	175	2	1.4115
SLTM	4	0.95755	0.95757	1	17584	0	2.1037	0.0018694	0.0038603	0.419189	176	2	2.1037
ATF1	4	0.60901	0.75228	1	13670	2	0.33212	0.0018906	0.0039043	0.421575	177	1	0.33212
POLR3D	4	0.18198	0.35953	0.990043	6933	2	-0.42715	0.0019424	0.0039996	0.42931	178	1	-0.42715
IFITM1	4	0.75976	0.83731	1	15178	1	2.0284	0.0019533	0.0040209	0.42931	179	2	2.0284
GALR3	4	0.99726	0.99725	1	18750	0	2.3608	0.0019891	0.0040877	0.432727	180	2	2.3608
LRRC10	4	0.038238	0.11401	0.844097	2569	2	1.4028	0.0020029	0.0041131	0.432727	181	2	1.4028
RAD51C	4	0.99971	0.99971	1	18991	0	1.9817	0.00202	0.0041488	0.432727	182	2	1.9817
DPH1	4	0.99631	0.99632	1	18687	0	1.5474	0.0020251	0.0041555	0.432727	183	2	1.5474
RPS10	4	0.5307	0.69261	1	12601	2	0.51363	0.0020419	0.0041887	0.432727	184	2	0.51363
DNMT1	4	0.67987	0.80753	1	14613	2	0.65253	0.0020419	0.0041887	0.432727	185	2	0.65253
RFC4	4	0.92929	0.92979	1	16992	1	2.0855	0.0020615	0.0042255	0.43418	186	2	2.0855
KIAA1024L	4	0.41399	0.60646	1	11115	2	0.086392	0.0020977	0.004297	0.439165	187	1	0.086392
RPS15A	4	0.23281	0.43016	1	8175	2	0.33479	0.0022335	0.0045658	0.447499	188	2	0.33479
GDF2	4	0.99759	0.99758	1	18771	0	1.3127	0.0022335	0.0045658	0.447499	189	2	1.3127
PAK1IP1	4	0.27656	0.48796	1	9190	2	0.37506	0.0022335	0.0045658	0.447499	190	2	0.37506
RPS4X	4	0.93654	0.9366	1	17108	1	0.93245	0.0022335	0.0045658	0.447499	191	2	0.93245
KARS	4	0.9239	0.92505	1	16908	1	0.8871	0.0022335	0.0045658	0.447499	192	2	0.8871
PPIAL4F	4	0.92133	0.92284	1	16873	1	1.5364	0.0022335	0.0045658	0.447499	193	2	1.5364
CPSF3L	4	0.84064	0.87147	1	15833	1	1.4274	0.0022335	0.0045658	0.447499	194	2	1.4274
URB2	4	0.16057	0.32859	0.982258	6384	1	0.86733	0.0022335	0.0045658	0.447499	195	2	0.86733
MRPS16	4	0.65969	0.79158	1	14334	1	0.55357	0.0023047	0.0046938	0.456627	196	1	0.55357
H3F3C	4	0.7523	0.83467	1	15132	1	2.4608	0.0023101	0.0047068	0.456627	197	2	2.4608
ZNF383	4	0.99117	0.99118	1	18493	0	1.1899	0.0024081	0.004887	0.471722	198	1	1.1899
NSL1	4	0.20664	0.39437	0.998651	7530	2	0.48612	0.0024579	0.0049792	0.474435	199	2	0.48612
PMP22	4	0.99217	0.99219	1	18530	0	1.9567	0.0024599	0.0049808	0.474435	200	2	1.9567
NFE2L2	4	0.68314	0.81012	1	14662	2	0.87254	0.0024655	0.0049896	0.474435	201	2	0.87254
ZNF25	4	0.4147	0.60697	1	11127	2	1.5246	0.0024824	0.0050171	0.474684	202	2	1.5246
FOXL1	4	0.11435	0.2588	0.949842	5200	3	-0.37715	0.0025116	0.0050699	0.47732	203	1	-0.37715
LGALS9	4	0.98909	0.98908	1	18417	0	2.8256	0.0025319	0.0051036	0.478135	204	2	2.8256
RFPL4AL1	4	0.80585	0.85555	1	15532	1	2.5724	0.0025474	0.0051336	0.478604	205	2	2.5724
GOLGA6D	4	0.98848	0.98848	1	18398	0	0.97301	0.0025634	0.00516	0.478732	206	1	0.97301
PGA3	4	0.99888	0.99886	1	18885	0	2.9987	0.0026322	0.0052911	0.484374	207	2	2.9987
TBC1D3L	4	0.84528	0.87376	1	15876	1	2.009	0.0026481	0.0053175	0.484374	208	2	2.009
USP17L11	4	0.60448	0.74883	1	13614	2	0.85984	0.0026668	0.0053424	0.484374	209	1	0.85984
GOLGA8R	4	0.62506	0.76473	1	13880	1	1.9512	0.0026703	0.0053476	0.484374	210	2	1.9512
HPN	4	0.68629	0.81259	1	14701	1	1.7845	0.0027186	0.0054377	0.488379	211	2	1.7845
KCTD8	4	0.98107	0.98109	1	18194	0	2.7065	0.0027216	0.0054429	0.488379	212	2	2.7065
FADS1	4	0.38773	0.58733	1	10800	1	1.9037	0.0027993	0.0055968	0.497513	213	2	1.9037
INTS3	4	0.93306	0.93327	1	17054	1	1.4036	0.002822	0.0056408	0.499106	214	1	1.4036
EIF3L	4	0.99985	0.99986	1	19018	0	2.3985	0.0028418	0.0056828	0.500502	215	2	2.3985
FEN1	3	0.94719	0.94742	1	17344	0	0.55448	0.0028741	0.0055714	0.497513	216	1	0.55448
MTG2	4	0.20527	0.39242	0.998651	7494	1	0.62685	0.0029255	0.0058485	0.51274	217	1	0.62685
UBAP2L	4	0.99982	0.99983	1	19013	0	2.4421	0.0029646	0.0059216	0.516773	218	2	2.4421
AP4S1	4	0.99912	0.99912	1	18908	0	2.1674	0.0030728	0.0061076	0.530581	219	2	2.1674
SUZ12	4	0.072824	0.1924	0.909358	4027	1	1.9588	0.0031105	0.0061829	0.534698	220	2	1.9588
OR2L8	4	0.48548	0.65884	1	12002	2	-0.099203	0.0031323	0.0062262	0.536014	221	1	-0.099203
CCDC168	4	0.073656	0.19374	0.909358	4054	2	1.3575	0.003176	0.0063153	0.540112	222	2	1.3575
PARP1	4	0.23571	0.43414	1	8235	1	1.0085	0.003184	0.0063303	0.540112	223	1	1.0085
CBWD6	4	0.29896	0.51655	1	9645	2	1.2745	0.0032073	0.0063684	0.540327	224	2	1.2745
C17orf107	4	0.72824	0.82634	1	14969	1	2.3409	0.0032177	0.0063894	0.540327	225	2	2.3409
C11orf91	4	0.64449	0.77977	1	14138	1	2.2674	0.0032703	0.0064945	0.544114	226	2	2.2674
RPL32	4	0.2656	0.47386	1	8943	1	1.2689	0.0033392	0.0066163	0.544114	227	2	1.2689
SPC24	4	0.6905	0.81449	1	14735	1	0.96396	0.0033392	0.0066163	0.544114	228	2	0.96396
VENTX	4	0.30596	0.52531	1	9788	2	0.53253	0.0033392	0.0066163	0.544114	229	2	0.53253
TCEB2	4	0.10272	0.24053	0.944851	4855	1	1.1888	0.0033392	0.0066163	0.544114	230	2	1.1888
XAB2	4	0.99948	0.99949	1	18955	0	1.6753	0.0033392	0.0066163	0.544114	231	2	1.6753
TSR3	4	0.67215	0.80144	1	14502	1	2.0089	0.0033837	0.0067044	0.544114	232	2	2.0089
ICAM4	4	0.97126	0.97137	1	17932	0	2.6123	0.0033873	0.0067111	0.544114	233	2	2.6123
MMS19	4	0.20822	0.39661	0.998651	7562	3	-1.4409	0.0033909	0.0067189	0.544114	234	1	-1.4409
PHOSPHO1	4	0.99947	0.99948	1	18950	0	2.4452	0.0033909	0.0067189	0.544114	235	2	2.4452
OPRM1	4	0.34139	0.55417	1	10243	1	0.9695	0.0034426	0.0068116	0.549296	236	1	0.9695
LGALS7	4	0.11667	0.26235	0.950301	5267	2	1.139	0.0034881	0.0068955	0.552115	237	2	1.139
TNNT2	4	0.99278	0.99281	1	18549	0	1.208	0.0034943	0.0069043	0.552115	238	1	1.208
SRRD	4	0.99987	0.99988	1	19020	0	2.3561	0.0035209	0.0069509	0.553527	239	2	2.3561
PCNP	4	0.41144	0.60464	1	11081	2	-0.1114	0.003546	0.006995	0.554722	240	1	-0.1114
ITGA4	4	0.83032	0.86657	1	15738	1	0.54577	0.0035977	0.0070898	0.559917	241	1	0.54577
HBG2	4	0.91166	0.9149	1	16719	1	1.8425	0.0036384	0.0071799	0.564052	242	2	1.8425
TMEM39A	4	0.22921	0.42527	1	8096	1	0.29696	0.0036494	0.0072012	0.564052	243	1	0.29696
RPL17	4	0.67143	0.80089	1	14493	2	0.59685	0.003696	0.0072856	0.568337	244	2	0.59685
LOC388436	4	0.99403	0.99408	1	18593	0	2.4196	0.0037427	0.0073649	0.572185	245	2	2.4196
PSMB4	4	0.29978	0.51761	1	9659	1	1.4294	0.0037653	0.0074042	0.572915	246	2	1.4294
GLYAT	4	0.9999	0.9999	1	19030	0	2.4317	0.0037992	0.0074664	0.572982	247	2	2.4317
KLK3	4	0.35977	0.56723	1	10472	2	0.38462	0.0038303	0.0075218	0.572982	248	1	0.38462
TAC4	4	0.97545	0.97563	1	18045	0	1.5533	0.0038428	0.0075498	0.572982	249	2	1.5533
RPL38	4	0.93723	0.93733	1	17118	1	1.7349	0.0038523	0.0075648	0.572982	250	2	1.7349
C12orf75	4	0.15976	0.32742	0.981316	6369	2	0.74279	0.0038637	0.0075819	0.572982	251	2	0.74279
UBE4B	4	0.99995	0.99995	1	19058	0	2.2978	0.0038943	0.0076358	0.572982	252	2	2.2978
ARMCX5	4	0.83579	0.86918	1	15789	1	1.0199	0.0039078	0.0076571	0.572982	253	1	1.0199
WDR25	4	0.26566	0.47393	1	8946	2	0.94273	0.0039365	0.0077094	0.572982	254	2	0.94273
PSMG4	4	0.89615	0.90365	1	16503	1	0.22285	0.0039595	0.0077462	0.572982	255	1	0.22285
HELQ	4	0.8501	0.87623	1	15932	1	1.7445	0.003975	0.0077757	0.572982	256	2	1.7445
HINFP	4	0.83308	0.86789	1	15765	1	0.55366	0.0039789	0.0077866	0.572982	257	2	0.55366
KLHL33	4	0.38266	0.58363	1	10732	2	1.2683	0.0039827	0.0077949	0.572982	258	2	1.2683
RHOQ	4	0.95469	0.95471	1	17523	0	0.92832	0.0040112	0.0078539	0.574994	259	1	0.92832
RPS13	3	0.99658	0.99666	1	18701	0	0.90006	0.0040245	0.0077379	0.572982	260	2	0.90006
TMEM106A	4	0.98228	0.98229	1	18226	0	2.0511	0.0040254	0.0078824	0.574994	261	2	2.0511
H1FX	4	0.79882	0.8526	1	15465	1	1.1966	0.0040628	0.0079498	0.575701	262	1	1.1966
TECRL	4	0.26044	0.46711	1	8810	2	1.2669	0.0040643	0.0079523	0.575701	263	2	1.2669
KRTAP4_2	4	0.95567	0.95572	1	17549	0	2.7923	0.0040956	0.0080192	0.578349	264	2	2.7923
MRFAP1L1	4	0.57885	0.72905	1	13256	2	0.22895	0.0041662	0.0081456	0.583925	265	1	0.22895
HOXB9	4	0.94823	0.94827	1	17362	0	2.4387	0.0042299	0.0082673	0.583925	266	2	2.4387
MS4A6A	4	0.99995	0.99994	1	19057	0	2.4072	0.0042437	0.0082932	0.583925	267	2	2.4072
GDE1	4	0.54921	0.70648	1	12852	1	1.7465	0.0042437	0.0082932	0.583925	268	2	1.7465
TNFAIP1	4	0.99954	0.99954	1	18967	0	2.7443	0.0042498	0.0083036	0.583925	269	2	2.7443
GPAM	4	0.15035	0.31339	0.975264	6136	1	1.9989	0.0042578	0.0083217	0.583925	270	2	1.9989
SLC47A1	4	0.96872	0.96879	1	17875	0	1.6348	0.0042778	0.0083538	0.583925	271	2	1.6348
TMEM199	4	0.38406	0.58467	1	10750	2	1.048	0.0042938	0.0083813	0.583925	272	2	1.048
PROCA1	4	0.90488	0.90983	1	16618	1	1.9148	0.0043019	0.0083968	0.583925	273	2	1.9148
FAM117A	4	0.99994	0.99993	1	19048	0	2.4062	0.0043179	0.0084253	0.583925	274	2	2.4062
KDM2A	4	0.031095	0.094832	0.827216	2185	1	1.7169	0.0043219	0.0084326	0.583925	275	2	1.7169
U2AF2	4	0.0093773	0.03148	0.731229	818	2	0.15669	0.0043542	0.0084942	0.584389	276	2	0.15669
MOB3C	4	0.25572	0.46082	1	8705	2	1.1111	0.0043623	0.0085067	0.584389	277	2	1.1111
USP17L19	4	0.9992	0.9992	1	18915	0	2.0382	0.0043784	0.008531	0.584389	278	2	2.0382
TWF1	4	0.45576	0.63682	1	11635	2	1.0391	0.0044245	0.0086077	0.585726	279	2	1.0391
SCGB2A2	4	0.27048	0.4801	1	9054	1	2.5026	0.0044271	0.0086118	0.585726	280	2	2.5026
RPP21	4	0.5307	0.69261	1	12603	1	1.2377	0.0045027	0.0087512	0.592311	281	2	1.2377
RPL6	4	0.93151	0.93185	1	17027	1	1.5063	0.0045537	0.0088439	0.592311	282	2	1.5063
VPRBP	4	0.29944	0.51717	1	9649	3	-0.40078	0.0045537	0.0088439	0.592311	283	1	-0.40078
DONSON	4	0.62178	0.76214	1	13836	2	-0.014528	0.0045537	0.0088439	0.592311	284	1	-0.014528
MFF	4	0.47928	0.65424	1	11919	2	1.4209	0.0045665	0.0088636	0.592311	285	2	1.4209
STAT5B	4	0.9935	0.99354	1	18572	0	2.2749	0.004612	0.0089475	0.594902	286	2	2.2749
CMTR1	4	0.0027749	0.0098329	0.594302	310	2	-0.75993	0.0046224	0.0089646	0.594902	287	2	-0.75993
CHD8	4	0.70984	0.82034	1	14854	1	1.896	0.0046912	0.0090884	0.600393	288	2	1.896
CREBRF	4	0.98922	0.9892	1	18420	0	2.331	0.0046995	0.0091102	0.600393	289	2	2.331
UBE3C	4	0.82554	0.86426	1	15692	1	3.044	0.0047163	0.0091449	0.600609	290	2	3.044
SETDB2	4	0.12624	0.27705	0.959782	5511	2	0.074927	0.0047345	0.0091848	0.601163	291	1	0.074927
MED19	4	0.50951	0.67677	1	12337	1	1.6209	0.0047815	0.0092713	0.604755	292	2	1.6209
ZNF275	4	0.91518	0.91772	1	16778	1	1.8146	0.0048005	0.009307	0.605021	293	2	1.8146
ZNF789	4	0.030487	0.093149	0.826074	2145	3	-0.29911	0.0048378	0.0093739	0.605844	294	1	-0.29911
SEPW1	4	0.99856	0.99853	1	18846	0	2.185	0.0048429	0.0093879	0.605844	295	2	2.185
NYAP1	4	0.98575	0.98572	1	18324	0	1.4331	0.0048557	0.0094148	0.605844	296	2	1.4331
ANKLE2	4	0.24889	0.45176	1	8549	2	0.65478	0.0049154	0.0095153	0.609521	297	2	0.65478
PIP5KL1	4	0.40501	0.59988	1	11005	2	0.33679	0.0049411	0.0095624	0.609521	298	1	0.33679
LOC79999	4	0.78739	0.84793	1	15370	1	1.8851	0.0049432	0.0095676	0.609521	299	2	1.8851
RPSA	4	0.051024	0.14689	0.87793	3189	2	-1.2364	0.0049927	0.0096521	0.612858	300	1	-1.2364
RPL35A	4	0.98885	0.98883	1	18412	0	1.145	0.0050316	0.0097298	0.612963	301	2	1.145
FKBP4	4	0.80272	0.85423	1	15499	1	1.6473	0.0050443	0.0097552	0.612963	302	2	1.6473
PGGT1B	4	0.029828	0.091318	0.822797	2110	2	0.96604	0.0050489	0.0097609	0.612963	303	2	0.96604
C17orf53	4	0.99993	0.99992	1	19043	0	1.8928	0.0050749	0.0098059	0.612963	304	2	1.8928
IGFN1	4	0.12194	0.2705	0.95569	5403	2	-0.35762	0.005096	0.00985	0.612963	305	1	-0.35762
POLR2A	4	0.093962	0.22687	0.93388	4638	3	-1.165	0.0051476	0.0099303	0.612963	306	1	-1.165
USP17L28	4	0.18069	0.3577	0.989216	6895	2	0.99845	0.005149	0.0099318	0.612963	307	2	0.99845
6_Sep	4	0.29827	0.51568	1	9631	2	1.3208	0.0051709	0.0099784	0.612963	308	2	1.3208
GIF	4	0.97777	0.97797	1	18109	0	2.0171	0.0051884	0.010016	0.612963	309	2	2.0171
DCTN1	4	0.75328	0.835	1	15139	1	1.1672	0.0051992	0.010033	0.612963	310	1	1.1672
SPDYE1	4	0.94163	0.94171	1	17211	0	2.0951	0.0052148	0.010061	0.612963	311	2	2.0951
OXA1L	4	0.47471	0.65083	1	11871	2	0.90088	0.0052214	0.010071	0.612963	312	2	0.90088
INCENP	4	0.71814	0.82305	1	14898	1	1.4403	0.0052214	0.010071	0.612963	313	2	1.4403
MAK16	4	0.92681	0.92759	1	16951	1	0.58402	0.0053025	0.010223	0.618922	314	1	0.58402
XPO1	1	0.99469	0.99475	1	18618	0	2.5449	0.0053066	0.0052388	0.48369	315	1	2.5449
SMARCA2	4	0.65539	0.78827	1	14274	2	0.7251	0.0053076	0.010233	0.618922	316	2	0.7251
MRPL40	4	0.19783	0.3819	0.996919	7310	3	-0.80471	0.0053541	0.010317	0.621998	317	1	-0.80471
CEACAM20	4	0.56426	0.71791	1	13070	1	1.7825	0.0053878	0.010364	0.622875	318	2	1.7825
SCAMP4	4	0.58077	0.73055	1	13287	2	-0.0187	0.0054058	0.010403	0.62325	319	1	-0.0187
DUSP3	4	0.98107	0.98109	1	18193	0	1.7292	0.0054371	0.010462	0.624861	320	2	1.7292
MIPOL1	4	0.29989	0.51774	1	9663	2	-0.09918	0.0054574	0.010498	0.625042	321	1	-0.09918
LRRC45	4	0.9845	0.98449	1	18285	0	2.3803	0.0054866	0.010545	0.625869	322	2	2.3803
KRT15	4	0.99785	0.99785	1	18789	0	2.5209	0.0055454	0.010658	0.630613	323	2	2.5209
SLC16A3	4	0.97476	0.9749	1	18030	0	2.4356	0.0055817	0.010726	0.632701	324	2	2.4356
OR4S2	4	0.99953	0.99953	1	18965	0	2.4286	0.0056364	0.010833	0.635076	325	2	2.4286
OR4F29	3	0.99867	0.99872	1	18862	0	1.8021	0.0056544	0.01082	0.635076	326	2	1.8021
CCDC74A	4	0.4867	0.65974	1	12018	2	0.87091	0.0057097	0.01096	0.637477	327	2	0.87091
IARS	4	0.23162	0.42856	1	8151	2	0.15481	0.0057155	0.010972	0.637477	328	1	0.15481
ALS2CL	4	0.9585	0.95851	1	17607	0	1.5975	0.0057465	0.011021	0.637477	329	2	1.5975
BANP	3	0.086539	0.19491	0.909358	4435	2	-0.047628	0.005762	0.01104	0.637477	330	1	-0.047628
TMEM125	4	0.69135	0.81474	1	14737	1	1.7766	0.005839	0.011186	0.642847	331	2	1.7766
UTP11L	4	0.93587	0.93597	1	17100	1	1.6516	0.0058996	0.011296	0.642847	332	2	1.6516
GGPS1	4	0.31061	0.53116	1	9885	3	-0.43862	0.0059219	0.011336	0.642847	333	1	-0.43862
ARL2	4	0.90371	0.909	1	16604	1	0.78241	0.0059219	0.011336	0.642847	334	1	0.78241
RPP30	4	0.25526	0.46019	1	8690	3	-0.37369	0.0059219	0.011336	0.642847	335	1	-0.37369
DHX37	4	0.93126	0.93164	1	17020	1	0.8353	0.0059219	0.011336	0.642847	336	1	0.8353
TKFC	4	0.9999	0.9999	1	19033	0	2.6207	0.005937	0.011369	0.642847	337	2	2.6207
OR10Q1	4	0.99924	0.99924	1	18919	0	2.7253	0.0060027	0.011496	0.646105	338	2	2.7253
USO1	4	0.68158	0.80887	1	14637	2	0.75532	0.0060121	0.011514	0.646105	339	2	0.75532
FSTL4	4	0.66245	0.79378	1	14364	1	2.1752	0.0060215	0.011528	0.646105	340	2	2.1752
CXorf66	4	0.65785	0.79017	1	14315	2	1.1467	0.0061162	0.011707	0.652678	341	2	1.1467
SRSF6	4	0.89789	0.90485	1	16520	1	1.4162	0.00614	0.01175	0.652678	342	2	1.4162
TAF7	4	0.54191	0.701	1	12753	1	1.8013	0.0061447	0.011759	0.652678	343	2	1.8013
TMEM109	4	0.99994	0.99994	1	19050	0	2.445	0.0061685	0.011797	0.652678	344	2	2.445
TAOK3	4	0.75401	0.83527	1	15144	1	0.98502	0.0061799	0.011816	0.652678	345	1	0.98502
OTUD7A	4	0.67717	0.80542	1	14580	2	0.40515	0.0062315	0.011904	0.655557	346	1	0.40515
KRT17	4	0.98731	0.98727	1	18366	0	1.7599	0.0062499	0.011937	0.655557	347	2	1.7599
OR7G2	4	0.0021826	0.0078073	0.569515	260	3	-1.5422	0.0062831	0.011994	0.656799	348	1	-1.5422
MED13	4	0.96973	0.96978	1	17891	0	1.6285	0.006351	0.01211	0.657108	349	2	1.6285
IMPDH2	4	0.48549	0.65885	1	12003	1	1.7376	0.0063655	0.012143	0.657108	350	2	1.7376
TRANK1	4	0.035662	0.1072	0.840771	2429	3	-0.96975	0.0063863	0.012183	0.657108	351	1	-0.96975
ATP8B3	4	0.52399	0.68769	1	12525	1	1.9416	0.0064379	0.012279	0.657108	352	2	1.9416
TOMM70A	3	0.0069621	0.018948	0.66674	644	1	0.79584	0.0064589	0.012352	0.657108	353	1	0.79584
GGNBP2	4	0.97756	0.97776	1	18102	0	2.4933	0.0064822	0.012362	0.657108	354	2	2.4933
TRIM5	4	0.77129	0.84161	1	15259	1	0.26718	0.0064894	0.012375	0.657108	355	1	0.26718
TFIP11	4	0.66667	0.79709	1	14428	2	0.99377	0.0065262	0.012439	0.657108	356	2	0.99377
HMGN4	4	0.45018	0.63263	1	11556	2	1.3594	0.006536	0.012454	0.657108	357	2	1.3594
POLR2D	4	0.91554	0.91802	1	16786	1	0.47246	0.006541	0.012467	0.657108	358	1	0.47246
NOS2	4	0.99994	0.99993	1	19049	0	2.4136	0.0065507	0.012484	0.657108	359	2	2.4136
GBP5	4	0.43193	0.61946	1	11333	2	0.32297	0.0065926	0.012568	0.657108	360	1	0.32297
SPTBN2	4	0.72874	0.82648	1	14972	1	1.4074	0.0066097	0.012597	0.657108	361	2	1.4074
DYNLRB1	4	0.91906	0.92087	1	16845	1	1.2945	0.0066147	0.012604	0.657108	362	2	1.2945
OR8I2	4	0.99951	0.99951	1	18963	0	2.4349	0.0066196	0.012617	0.657108	363	2	2.4349
BRD4	4	0.99932	0.99933	1	18930	0	1.8806	0.0066344	0.012646	0.657108	364	2	1.8806
MMP2	4	0.54417	0.70271	1	12789	1	0.311	0.0066442	0.012667	0.657108	365	1	0.311
SLC35G6	4	0.9848	0.9848	1	18297	0	1.9796	0.0066443	0.012667	0.657108	366	2	1.9796
PMFBP1	4	0.48399	0.65773	1	11986	1	2.0122	0.0066591	0.012693	0.657108	367	2	2.0122
CABP4	4	0.85529	0.87899	1	15990	1	1.5176	0.0066789	0.012733	0.657108	368	2	1.5176
KRT40	4	0.98761	0.98758	1	18374	0	1.9175	0.0066888	0.012756	0.657108	369	2	1.9175
ARL4D	4	0.99598	0.99597	1	18670	0	1.7333	0.0067385	0.012861	0.658058	370	2	1.7333
TIPIN	4	0.67583	0.80436	1	14558	2	-0.16631	0.0067473	0.012877	0.658058	371	1	-0.16631
PAPD5	4	0.99714	0.99714	1	18737	0	1.6964	0.0067484	0.012877	0.658058	372	2	1.6964
PCDH1	4	0.2611	0.46799	1	8833	2	0.39091	0.0067989	0.012964	0.660454	373	1	0.39091
HOXD3	4	0.98456	0.98455	1	18290	0	1.4606	0.0068505	0.013052	0.660454	374	2	1.4606
GAGE12I	4	0.97905	0.97918	1	18140	0	1.92	0.0068533	0.013055	0.660454	375	2	1.92
NSFL1C	4	0.99976	0.99977	1	18999	0	2.2813	0.0068633	0.013072	0.660454	376	2	2.2813
ATP5J	4	0.97198	0.97212	1	17956	0	2.0106	0.0068784	0.013097	0.660454	377	2	2.0106
UBE2I	4	0.99948	0.99949	1	18954	0	1.0234	0.0069278	0.013188	0.661534	378	1	1.0234
BYSL	4	0.20488	0.39187	0.998651	7485	3	-0.3707	0.0069278	0.013188	0.661534	379	1	-0.3707
PPP6R3	4	0.97997	0.98004	1	18168	0	0.59789	0.0070052	0.013339	0.667345	380	1	0.59789
NME1_NME2	4	0.45915	0.63936	1	11685	1	0.80362	0.0070567	0.013423	0.669816	381	1	0.80362
SLC6A8	4	0.23395	0.43176	1	8200	3	-0.36929	0.0071083	0.013527	0.671626	382	1	-0.36929
MAT2A	4	0.15524	0.32071	0.978714	6254	2	-0.15127	0.0071113	0.013531	0.671626	383	2	-0.15127
DLX4	4	0.49742	0.66777	1	12178	2	0.96428	0.0071522	0.013607	0.671626	384	2	0.96428
OR5D13	4	0.99964	0.99964	1	18974	0	2.0185	0.0071829	0.013662	0.671626	385	2	2.0185
FRG2	4	0.99996	0.99996	1	19063	0	2.1754	0.0072085	0.013704	0.671626	386	2	2.1754
MYADML2	4	0.96432	0.96438	1	17754	0	0.87378	0.0072114	0.013707	0.671626	387	1	0.87378
MYOZ1	4	0.066052	0.18116	0.899916	3832	3	-0.43642	0.0072629	0.01379	0.671626	388	1	-0.43642
CDK12	4	0.99874	0.99872	1	18866	0	1.878	0.0072806	0.013821	0.671626	389	2	1.878
LINGO3	4	0.14481	0.30516	0.972725	5988	2	0.78866	0.0072858	0.01383	0.671626	390	2	0.78866
PRR16	4	0.40604	0.60063	1	11016	1	1.9305	0.0072961	0.01385	0.671626	391	2	1.9305
VKORC1	4	0.62594	0.7654	1	13896	1	0.41708	0.0073145	0.013881	0.671626	392	1	0.41708
OR7A10	4	0.53524	0.69591	1	12665	1	2.7027	0.0073841	0.013995	0.673632	393	2	2.7027
AQP7	4	0.91236	0.91546	1	16730	1	1.3908	0.0073918	0.014011	0.673632	394	1	1.3908
MMP14	4	0.054296	0.15517	0.882595	3357	2	-0.45576	0.0074691	0.014155	0.673632	395	1	-0.45576
DDX20	4	0.93755	0.93764	1	17128	0	1.4737	0.0074884	0.014187	0.673632	396	2	1.4737
EZR	4	0.17807	0.35398	0.988906	6831	2	0.89041	0.0074988	0.014208	0.673632	397	2	0.89041
GLYATL1	4	0.99999	0.99998	1	19081	0	2.7008	0.0075041	0.014217	0.673632	398	2	2.7008
DNPEP	4	0.54948	0.70669	1	12857	1	0.62236	0.0075207	0.014245	0.673632	399	1	0.62236
FBXO17	4	0.95142	0.95147	1	17437	0	1.6956	0.0075513	0.014295	0.673632	400	2	1.6956
CCDC84	4	0.97341	0.97356	1	18000	0	0.85119	0.0075722	0.014338	0.673632	401	1	0.85119
KRT38	4	0.9548	0.95483	1	17527	0	1.639	0.0075881	0.01437	0.673632	402	2	1.639
ZCCHC14	4	0.99973	0.99973	1	18994	0	2.1864	0.0076038	0.014395	0.673632	403	2	2.1864
SNRPA1	3	0.032606	0.081252	0.808159	2261	1	1.2569	0.0076971	0.013635	0.671626	404	1	1.2569
NBPF7	4	0.17516	0.34983	0.988906	6746	1	0.50898	0.0077268	0.014609	0.673632	405	1	0.50898
CCL17	4	0.0077691	0.026298	0.710641	705	3	-1.0352	0.0077784	0.014707	0.673632	406	1	-1.0352
GOLGA6A	4	0.97141	0.97154	1	17937	0	1.0414	0.0078506	0.014839	0.673632	407	2	1.0414
BIRC5	4	0.38406	0.58467	1	10753	1	0.78849	0.0078506	0.014839	0.673632	408	2	0.78849
RPS27A	4	0.96451	0.96456	1	17765	0	1.3172	0.0078506	0.014839	0.673632	409	2	1.3172
ATP5J2	4	0.047717	0.13858	0.868092	3035	2	-0.2316	0.0078506	0.014839	0.673632	410	2	-0.2316
UTP20	4	0.99799	0.99799	1	18800	0	1.0459	0.0078506	0.014839	0.673632	411	2	1.0459
RPS3	4	0.2567	0.46209	1	8729	2	0.059339	0.0078506	0.014839	0.673632	412	2	0.059339
ORAOV1	4	0.18069	0.3577	0.989216	6903	1	0.0094096	0.0078506	0.014839	0.673632	413	2	0.0094096
PMF1	4	0.98019	0.98027	1	18173	0	0.79434	0.0078506	0.014839	0.673632	414	2	0.79434
AFG3L2	4	0.40873	0.6026	1	11043	2	0.17063	0.0078506	0.014839	0.673632	415	2	0.17063
DDX47	4	0.99948	0.99949	1	18956	0	1.119	0.0078506	0.014839	0.673632	416	2	1.119
RPL13A	4	0.63874	0.77525	1	14051	2	0.24012	0.0078506	0.014839	0.673632	417	2	0.24012
DKC1	4	0.6393	0.77568	1	14060	1	0.49612	0.0078506	0.014839	0.673632	418	2	0.49612
DDX49	4	0.22673	0.42193	1	8039	2	-0.61443	0.0078506	0.014839	0.673632	419	2	-0.61443
OR6B2	4	0.80357	0.85459	1	15509	1	0.50825	0.0079845	0.015073	0.679726	420	1	0.50825
PEX19	4	0.9124	0.91549	1	16731	1	1.5766	0.0080307	0.015159	0.679726	421	2	1.5766
KPNA1	4	0.94647	0.94651	1	17324	0	1.4201	0.008036	0.015165	0.679726	422	1	1.4201
BMP1	4	0.26934	0.4786	1	9030	1	1.3744	0.0080443	0.015184	0.679726	423	2	1.3744
SLC25A4	4	0.45595	0.63696	1	11637	1	1.4062	0.0080578	0.015213	0.679726	424	2	1.4062
HSF5	4	0.99936	0.99937	1	18935	0	2.1214	0.0080632	0.015221	0.679726	425	2	2.1214
TMEM136	4	0.88437	0.89587	1	16334	1	2.1036	0.0080849	0.015265	0.679726	426	2	2.1036
UBAC2	4	0.65501	0.78797	1	14270	2	0.058698	0.0080875	0.015272	0.679726	427	1	0.058698
ATG16L2	4	0.87136	0.88803	1	16171	1	2.3943	0.0081012	0.015293	0.679726	428	2	2.3943
OR6M1	4	0.93912	0.93921	1	17157	0	1.1579	0.008139	0.01536	0.681112	429	1	1.1579
TAS2R7	4	0.087524	0.21652	0.926619	4458	2	-0.07388	0.0081906	0.015449	0.682265	430	1	-0.07388
CMPK2	4	0.59428	0.7409	1	13476	2	0.41537	0.0082421	0.015552	0.684524	431	1	0.41537
MPHOSPH9	4	0.053568	0.15333	0.882295	3318	2	-0.19184	0.0082936	0.015649	0.684524	432	1	-0.19184
FAM111B	4	0.99929	0.99931	1	18925	0	2.0844	0.0083196	0.015699	0.684524	433	2	2.0844
RASD1	4	0.060469	0.17021	0.893038	3632	1	2.0519	0.0083416	0.015737	0.684524	434	2	2.0519
PHF12	4	0.92351	0.92472	1	16905	1	2.3633	0.0083582	0.015765	0.684524	435	2	2.3633
PCGF2	4	0.99976	0.99977	1	19000	0	2.5369	0.0083802	0.015803	0.684524	436	2	2.5369
EIF3CL	4	0.27983	0.49225	1	9273	1	1.0364	0.0083885	0.015818	0.684524	437	2	1.0364
KRTAP2_2	4	0.99968	0.99968	1	18987	0	2.0049	0.0083966	0.015831	0.684524	438	1	2.0049
OR5M1	4	0.99637	0.99639	1	18690	0	2.0851	0.0083968	0.015831	0.684524	439	2	2.0851
NMT1	4	0.93622	0.93627	1	17103	1	1.5012	0.0084354	0.015904	0.685878	440	2	1.5012
NAPA	4	0.6351	0.77246	1	13998	2	0.73147	0.0084493	0.015934	0.685878	441	2	0.73147
OR9G1	4	0.99936	0.99937	1	18937	0	2.1705	0.0085186	0.016074	0.686522	442	2	2.1705
OR8H2	4	0.47858	0.65371	1	11913	1	1.533	0.0085297	0.016096	0.686522	443	2	1.533
TRIM48	4	0.99847	0.99845	1	18836	0	1.6488	0.0085854	0.016207	0.686522	444	2	1.6488
C19orf12	4	0.37069	0.57512	1	10603	2	1.0027	0.008591	0.016219	0.686522	445	2	1.0027
CMPK1	4	0.56282	0.71682	1	13049	1	0.23034	0.0086026	0.016243	0.686522	446	1	0.23034
CIRH1A	4	0.89772	0.90472	1	16519	1	0.75369	0.0086273	0.016297	0.686522	447	2	0.75369
TBC1D3H	4	0.99932	0.99933	1	18929	0	2.3282	0.0086469	0.016336	0.686522	448	2	2.3282
OR5A2	4	0.99844	0.99842	1	18835	0	2.3234	0.0086581	0.016356	0.686522	449	2	2.3234
ANKRD45	4	0.85567	0.87918	1	15995	1	1.6338	0.0086805	0.016399	0.686522	450	2	1.6338
RPS6KB1	4	0.99992	0.99992	1	19042	0	2.2186	0.008703	0.016441	0.686522	451	2	2.2186
LIMS3L	4	0.98879	0.98878	1	18409	0	1.8246	0.0087311	0.016494	0.686522	452	2	1.8246
SYNPO	4	0.22654	0.42168	1	8034	3	-0.54056	0.0087571	0.016538	0.686522	453	1	-0.54056
WEE1	4	0.93945	0.93956	1	17163	0	1.6291	0.0087592	0.016541	0.686522	454	2	1.6291
IFITM5	4	0.21847	0.41077	0.998651	7848	2	0.9793	0.0087705	0.016561	0.686522	455	2	0.9793
FOXN1	4	0.99926	0.99927	1	18922	0	2.4096	0.0087874	0.016596	0.686522	456	2	2.4096
OR9I1	4	0.99951	0.99951	1	18964	0	2.3613	0.0088212	0.016655	0.687499	457	2	2.3613
GPR20	4	0.30632	0.52575	1	9794	2	0.18646	0.0088601	0.016727	0.688309	458	1	0.18646
TEFM	4	0.99987	0.99987	1	19019	0	2.3001	0.0088948	0.016794	0.688309	459	2	2.3001
NCF4	4	0.59629	0.74245	1	13508	2	1.2303	0.0089062	0.016815	0.688309	460	2	1.2303
CMBL	4	0.10318	0.24126	0.944851	4873	3	-0.44828	0.0089116	0.016822	0.688309	461	1	-0.44828
TAOK1	4	0.99987	0.99988	1	19021	0	2.7178	0.0089346	0.016859	0.688309	462	2	2.7178
EFNB2	4	0.99745	0.99744	1	18764	0	1.7161	0.0089516	0.016891	0.688309	463	2	1.7161
SLC25A45	4	0.96331	0.96334	1	17722	0	1.791	0.0089915	0.016971	0.689566	464	2	1.791
HUWE1	4	0.47738	0.65283	1	11903	2	0.4082	0.0090429	0.017067	0.689566	465	2	0.4082
LACRT	4	0.63999	0.77621	1	14071	1	1.2833	0.0091002	0.017173	0.689566	466	2	1.2833
MTBP	2	0.9646	0.96471	1	17767	0	1.7428	0.009115	0.011015	0.637477	467	1	1.7428
CTAGE9	4	0.55005	0.70713	1	12866	2	1.0526	0.0091174	0.017195	0.689566	468	2	1.0526
ARRDC4	4	0.56454	0.71811	1	13074	2	1.4254	0.0091288	0.017222	0.689566	469	2	1.4254
PDRG1	4	0.0069278	0.023631	0.700599	638	3	-0.57027	0.0091433	0.017245	0.689566	470	1	-0.57027
ZNF526	4	0.2552	0.46013	1	8689	1	0.8123	0.0091433	0.017245	0.689566	471	1	0.8123
SUSD1	4	0.7397	0.83016	1	15051	1	1.3367	0.0091461	0.017251	0.689566	472	2	1.3367
CEP57	4	0.98991	0.98988	1	18450	0	1.6725	0.0091576	0.017269	0.689566	473	2	1.6725
TBKBP1	4	0.99387	0.9939	1	18589	0	2.1079	0.0091633	0.017282	0.689566	474	2	2.1079
GTF3C2	4	0.032334	0.098201	0.831185	2248	3	-0.55349	0.0092205	0.017397	0.691289	475	1	-0.55349
TMC8	4	0.61515	0.75705	1	13754	2	1.1466	0.0092209	0.017398	0.691289	476	2	1.1466
RBM19	4	0.93131	0.93168	1	17023	1	1.6541	0.0092527	0.017454	0.691358	477	2	1.6541
TADA2A	4	0.99987	0.99988	1	19022	0	2.0964	0.0092614	0.017472	0.691358	478	2	2.0964
C17orf75	4	0.99828	0.99827	1	18819	0	1.9306	0.0093135	0.017565	0.693611	479	2	1.9306
TNS4	4	0.97954	0.97967	1	18158	0	2.0916	0.0093483	0.017624	0.694488	480	2	2.0916
CCDC85A	4	0.96353	0.96357	1	17730	0	0.25927	0.0093749	0.017689	0.694821	481	1	0.25927
PLEKHG2	4	0.8827	0.89483	1	16310	1	1.6179	0.009389	0.017709	0.694821	482	2	1.6179
RAB11FIP4	4	0.93808	0.93815	1	17136	0	1.2756	0.0094264	0.017771	0.694821	483	1	1.2756
NXF3	4	0.79018	0.84902	1	15395	1	1.238	0.0094297	0.017778	0.694821	484	2	1.238
EIF1AX	4	0.084474	0.21154	0.921409	4371	1	1.4864	0.0094589	0.017832	0.695318	485	2	1.4864
OTOP2	4	0.8259	0.86443	1	15696	1	1.7636	0.0094764	0.017863	0.695318	486	2	1.7636
LDLRAD1	4	0.6653	0.796	1	14410	1	2.375	0.009494	0.0179	0.695333	487	2	2.375
CEACAM5	4	0.67495	0.80367	1	14544	1	1.5127	0.0095408	0.017986	0.696909	488	2	1.5127
KRTAP5_6	4	0.85345	0.87799	1	15968	1	1.6602	0.0096113	0.018107	0.696909	489	2	1.6602
POLG2	4	0.18069	0.3577	0.989216	6897	2	0.36374	0.009629	0.018135	0.696909	490	2	0.36374
CT47A6	4	0.39023	0.58916	1	10833	2	0.62496	0.0096322	0.018139	0.696909	491	1	0.62496
NCF1	4	0.90598	0.91065	1	16639	1	0.22999	0.0096322	0.018139	0.696909	492	1	0.22999
PHF23	4	0.99999	0.99999	1	19083	0	2.3413	0.0096525	0.018186	0.696909	493	2	2.3413
HGH1	4	0.94356	0.94367	1	17268	0	1.862	0.0096584	0.018196	0.696909	494	2	1.862
MAP2K3	4	0.99852	0.99848	1	18839	0	2.2922	0.009682	0.018234	0.69698	495	2	2.2922
PMVK	3	0.86688	0.86709	1	16120	1	1.5161	0.0097262	0.015457	0.682265	496	1	1.5161
TRIM49D2	4	0.99637	0.9964	1	18691	0	2.1382	0.009753	0.018361	0.697857	497	2	2.1382
TMEM132A	4	0.98266	0.98269	1	18237	0	1.9622	0.0097708	0.018399	0.697857	498	2	1.9622
TC2N	4	0.86656	0.88524	1	16115	1	1.5613	0.0098064	0.018459	0.697857	499	2	1.5613
TRIM56	4	0.035285	0.10624	0.840771	2397	2	0.063206	0.0098381	0.018513	0.697857	500	1	0.063206
TCP11X2	4	0.97235	0.9725	1	17970	0	1.4741	0.009842	0.018518	0.697857	501	2	1.4741
CCDC101	4	0.99991	0.99991	1	19036	0	2.4603	0.0098539	0.018535	0.697857	502	2	2.4603
ESRRA	4	0.99703	0.99705	1	18731	0	1.509	0.0098718	0.018569	0.697857	503	2	1.509
RNF149	4	0.97439	0.97454	1	18020	0	1.3151	0.0098895	0.018596	0.697857	504	1	1.3151
FAM222B	4	0.99878	0.99876	1	18871	0	2.3245	0.0098897	0.018596	0.697857	505	2	2.3245
LHX2	4	0.26997	0.47944	1	9045	2	1.1119	0.0099076	0.018628	0.697857	506	2	1.1119
SMIM11	4	0.22806	0.42373	1	8069	2	0.04883	0.009941	0.018688	0.697857	507	1	0.04883
KRTAP4_8	4	0.9792	0.97934	1	18147	0	2.6453	0.0099614	0.018728	0.697857	508	2	2.6453
PSMC3IP	4	0.9814	0.98142	1	18202	0	2.4784	0.0099853	0.018776	0.697857	509	2	2.4784
OR4A5	4	0.99938	0.99939	1	18942	0	2.0857	0.010009	0.018822	0.697857	510	2	2.0857
SFMBT1	4	0.79278	0.85009	1	15413	1	0.21433	0.010018	0.018837	0.697857	511	1	0.21433
IKZF3	4	0.43417	0.62109	1	11359	1	2.2965	0.010021	0.018841	0.697857	512	2	2.2965
FDXR	4	0.12537	0.27576	0.95921	5488	1	0.92388	0.010072	0.018928	0.699279	513	2	0.92388
WDR45B	4	0.62871	0.76756	1	13936	2	0.47488	0.010095	0.018965	0.699279	514	1	0.47488
CTBP2	4	0.11867	0.26544	0.951252	5321	1	1.9067	0.010111	0.018989	0.699279	515	2	1.9067
SUMO2	4	0.046458	0.13537	0.868092	2970	3	-1.5318	0.010147	0.019066	0.700752	516	1	-1.5318
MTIF3	4	0.080976	0.20582	0.917676	4274	2	0.81029	0.01019	0.019143	0.701308	517	2	0.81029
SLC30A9	4	0.455	0.63623	1	11619	2	0.076909	0.010198	0.019156	0.701308	518	1	0.076909
TEKT4	4	0.86908	0.88672	1	16149	1	1.7487	0.010275	0.019296	0.701308	519	2	1.7487
RPS2	4	0.98782	0.98781	1	18378	0	0.95427	0.010299	0.019343	0.701308	520	2	0.95427
UST	4	0.65432	0.78744	1	14261	1	0.57442	0.010301	0.019346	0.701308	521	1	0.57442
SF3B2	4	0.29978	0.51761	1	9661	1	1.4187	0.010317	0.019377	0.701308	522	2	1.4187
EIF4E	4	0.70687	0.81944	1	14832	1	1.0424	0.010336	0.01941	0.701308	523	2	1.0424
NARS	4	0.071035	0.18938	0.905803	3982	2	0.11759	0.010336	0.01941	0.701308	524	2	0.11759
INCA1	4	0.99143	0.99146	1	18504	0	1.4049	0.010352	0.01945	0.701308	525	1	1.4049
POLD1	4	0.98277	0.98279	1	18240	0	0.95908	0.010354	0.019453	0.701308	526	2	0.95908
AKAP1	4	0.99995	0.99995	1	19061	0	2.4321	0.010397	0.019541	0.701308	527	2	2.4321
KRTAP5_3	4	0.79855	0.85248	1	15464	1	1.9294	0.010404	0.019554	0.701308	528	1	1.9294
MYL9	4	0.87432	0.88981	1	16204	1	1.4222	0.010507	0.01974	0.705964	529	2	1.4222
TRIM43	4	0.99918	0.99918	1	18912	0	1.8684	0.010525	0.019776	0.705964	530	2	1.8684
ALG2	3	0.20296	0.35131	0.988906	7423	1	0.34204	0.010556	0.016233	0.686522	531	1	0.34204
KXD1	3	0.32916	0.48304	1	10115	2	-0.36048	0.010556	0.016233	0.686522	532	1	-0.36048
BMS1	4	0.021262	0.067327	0.792868	1607	2	0.16637	0.010571	0.019852	0.705964	533	2	0.16637
ZNF568	4	0.20555	0.3928	0.998651	7499	2	0.42343	0.010571	0.019852	0.705964	534	2	0.42343
RPL3	2	0.35118	0.44424	1	10355	1	0.63768	0.010585	0.012416	0.657108	535	1	0.63768
SPINK13	4	0.46593	0.64425	1	11764	2	0.055293	0.01061	0.019916	0.705964	536	1	0.055293
TRIP10	4	0.95794	0.95797	1	17593	0	1.6971	0.010654	0.020004	0.705964	537	2	1.6971
VMP1	4	0.99295	0.99297	1	18555	0	0.84242	0.010661	0.020018	0.705964	538	1	0.84242
TAF6L	4	0.99997	0.99998	1	19070	0	2.4509	0.010673	0.020034	0.705964	539	2	2.4509
GOLGA6L6	4	0.54985	0.70698	1	12864	1	1.1157	0.010685	0.020055	0.705964	540	2	1.1157
CD300A	4	0.96829	0.96835	1	17864	0	1.5539	0.010691	0.020063	0.705964	541	2	1.5539
FAM76B	4	0.96686	0.9669	1	17831	0	1.3054	0.010712	0.020094	0.705964	542	1	1.3054
HMHA1	4	0.96422	0.96427	1	17751	0	1.9408	0.010778	0.020229	0.708953	543	2	1.9408
BTBD18	4	0.99965	0.99966	1	18979	0	2.6449	0.010803	0.020276	0.708953	544	2	2.6449
C2orf16	4	0.10296	0.24092	0.944851	4865	3	-0.78749	0.010815	0.020291	0.708953	545	1	-0.78749
TMEM99	4	0.99761	0.99761	1	18774	0	2.1052	0.010868	0.020391	0.710276	546	2	2.1052
THUMPD3	4	0.84154	0.8719	1	15841	1	0.41007	0.010918	0.020478	0.710276	547	1	0.41007
UXT	3	0.022456	0.057553	0.775588	1692	2	-1.5639	0.010923	0.01658	0.686522	548	1	-1.5639
NKIRAS2	4	0.99999	0.99998	1	19079	0	2.2242	0.010946	0.020522	0.710276	549	2	2.2242
IRX6	4	0.15357	0.31821	0.977546	6214	1	1.4722	0.01097	0.020559	0.710276	550	1	1.4722
RPL15	4	0.99182	0.99185	1	18518	0	1.2984	0.010978	0.020574	0.710276	551	2	1.2984
ANKRD36	4	0.99891	0.9989	1	18889	0	1.6441	0.01099	0.020598	0.710276	552	2	1.6441
PPP2R1A	4	0.96434	0.9644	1	17755	0	1.5298	0.011006	0.020626	0.710276	553	2	1.5298
MCTP1	4	0.89564	0.9033	1	16495	1	1.5942	0.011006	0.020626	0.710276	554	2	1.5942
HJURP	4	0.67421	0.80308	1	14528	2	-0.017712	0.011047	0.020706	0.711758	555	1	-0.017712
NR1D1	4	0.99965	0.99965	1	18977	0	2.1856	0.011091	0.020787	0.712208	556	2	2.1856
SLC13A2	4	0.99995	0.99995	1	19059	0	2.5775	0.011122	0.020851	0.712208	557	2	2.5775
FGF9	4	0.58141	0.73102	1	13295	2	0.18311	0.011124	0.020854	0.712208	558	1	0.18311
PLXNA2	4	0.41987	0.61067	1	11186	2	0.98666	0.011135	0.020868	0.712208	559	2	0.98666
TKTL2	4	0.93755	0.93764	1	17125	0	0.62775	0.011175	0.020941	0.712915	560	1	0.62775
LGALS9C	4	0.95762	0.95764	1	17585	0	1.9315	0.011192	0.020973	0.712915	561	2	1.9315
NF2	4	0.99994	0.99994	1	19054	0	2.0134	0.011217	0.021016	0.712915	562	2	2.0134
SRBD1	4	0.46607	0.64436	1	11768	2	-0.046178	0.011227	0.021038	0.712915	563	1	-0.046178
CDC16	4	0.5307	0.69261	1	12607	2	0.28782	0.011329	0.021219	0.717769	564	1	0.28782
FURIN	4	0.97171	0.97183	1	17946	0	1.1599	0.011471	0.021472	0.719111	565	2	1.1599
TUFM	4	0.23162	0.42856	1	8157	3	-1.3976	0.011483	0.021494	0.719111	566	1	-1.3976
SHMT1	4	0.97653	0.97671	1	18074	0	1.0868	0.011483	0.021494	0.719111	567	1	1.0868
NOL10	4	0.83308	0.86789	1	15764	1	0.7038	0.011483	0.021494	0.719111	568	1	0.7038
FGF13	4	0.55922	0.71411	1	12996	2	-0.089974	0.011483	0.021494	0.719111	569	1	-0.089974
C19orf67	4	0.61757	0.75893	1	13777	2	1.1622	0.011497	0.021513	0.719111	570	2	1.1622
SAA2	4	0.62601	0.76546	1	13898	2	1.0448	0.011503	0.021522	0.719111	571	2	1.0448
OR5R1	4	0.99967	0.99966	1	18984	0	1.9575	0.011567	0.021639	0.721744	572	2	1.9575
MSL1	4	0.9996	0.9996	1	18971	0	2.3021	0.011599	0.021705	0.722695	573	2	2.3021
TBC1D3B	4	0.99756	0.99755	1	18770	0	2.0492	0.011651	0.021793	0.724091	574	2	2.0492
FHDC1	4	0.16134	0.32974	0.982258	6408	3	-0.51049	0.011689	0.021859	0.724091	575	1	-0.51049
SFMBT2	4	0.97047	0.97053	1	17908	0	2.0556	0.011735	0.021938	0.724091	576	2	2.0556
RPTOR	4	0.97063	0.9707	1	17915	0	1.1293	0.01174	0.021949	0.724091	577	1	1.1293
PRAC1	4	0.99645	0.99648	1	18697	0	1.5539	0.01178	0.022024	0.724091	578	2	1.5539
B4GALNT4	4	0.97335	0.97351	1	17997	0	1.6024	0.011786	0.022038	0.724091	579	2	1.6024
PCDH18	4	0.79247	0.84996	1	15411	1	0.4733	0.011792	0.02205	0.724091	580	1	0.4733
TSNAXIP1	4	0.47762	0.65299	1	11908	2	-0.040883	0.011895	0.022221	0.725256	581	1	-0.040883
ZNF384	4	0.99036	0.99036	1	18467	0	1.6702	0.011897	0.02223	0.725256	582	2	1.6702
UBE3B	4	0.16193	0.33059	0.982719	6423	2	0.75168	0.011903	0.022242	0.725256	583	2	0.75168
HSPBAP1	4	0.06474	0.17899	0.89937	3791	2	0.441	0.011942	0.022319	0.725256	584	2	0.441
LDLRAD3	4	0.069808	0.18738	0.904874	3945	3	-0.1523	0.011946	0.022326	0.725256	585	1	-0.1523
AARSD1	4	0.99839	0.99837	1	18828	0	2.1009	0.011949	0.022335	0.725256	586	2	2.1009
LGALS9B	4	0.97107	0.97117	1	17926	0	1.908	0.011968	0.022369	0.725256	587	2	1.908
VPS37C	4	0.86938	0.88688	1	16153	1	2.4254	0.012001	0.022422	0.725256	588	2	2.4254
GDF10	4	0.69932	0.81712	1	14781	1	0.37271	0.012023	0.022465	0.725256	589	1	0.37271
METAP2	4	0.31109	0.53177	1	9893	3	-0.32888	0.012023	0.022465	0.725256	590	1	-0.32888
FAM168A	4	0.452	0.63401	1	11576	1	1.98	0.012079	0.022561	0.726941	591	2	1.98
TAGAP	4	0.17745	0.35307	0.988906	6814	3	-0.4478	0.0121	0.022602	0.726941	592	1	-0.4478
IL18BP	4	0.27808	0.48995	1	9223	2	0.72423	0.012119	0.022631	0.726941	593	2	0.72423
EXT2	4	0.96527	0.96532	1	17787	0	1.4006	0.012198	0.022775	0.728944	594	2	1.4006
ZNF608	4	0.42197	0.61223	1	11204	1	0.82827	0.012203	0.022784	0.728944	595	1	0.82827
GPX8	4	0.86552	0.88469	1	16105	1	1.6799	0.01223	0.022837	0.728944	596	2	1.6799
COA3	4	0.99948	0.99949	1	18959	0	2.2851	0.012254	0.022884	0.728944	597	2	2.2851
PEX12	4	0.98872	0.98872	1	18405	0	1.557	0.012277	0.022919	0.728944	598	2	1.557
RPL26L1	4	0.93105	0.93142	1	17016	1	1.0015	0.012303	0.022963	0.728944	599	2	1.0015
GEMIN6	4	0.68081	0.80828	1	14624	2	0.7416	0.012326	0.023006	0.728944	600	2	0.7416
TUBGCP2	4	0.13329	0.28778	0.966525	5679	1	1.2387	0.012326	0.023006	0.728944	601	2	1.2387
GLYATL2	4	0.27455	0.48537	1	9148	1	2.2157	0.012343	0.023037	0.728944	602	2	2.2157
MAD2L1BP	4	0.99937	0.99938	1	18941	0	2.1589	0.012389	0.023118	0.729316	603	2	2.1589
TMUB2	4	0.99904	0.99904	1	18902	0	2.0513	0.012396	0.023125	0.729316	604	2	2.0513
FAM206A	4	0.1416	0.30037	0.970989	5899	1	1.333	0.012449	0.023219	0.729548	605	2	1.333
RGPD5	4	0.31119	0.53189	1	9897	2	1.2446	0.012509	0.023314	0.729548	606	2	1.2446
EP400	4	0.77798	0.84415	1	15308	1	0.62259	0.012511	0.023316	0.729548	607	1	0.62259
SNRNP25	4	0.62208	0.76237	1	13841	2	-0.12027	0.012511	0.023316	0.729548	608	1	-0.12027
GABARAP	4	0.99864	0.9986	1	18858	0	1.8281	0.012515	0.023326	0.729548	609	2	1.8281
CCDC115	4	0.93306	0.93327	1	17053	1	1.1799	0.012558	0.0234	0.729548	610	2	1.1799
DTX4	4	0.99768	0.99768	1	18780	0	2.4742	0.012582	0.023443	0.729698	611	2	2.4742
AKR1C2	4	0.86776	0.88595	1	16130	1	1.603	0.012629	0.02353	0.731232	612	2	1.603
OR5L2	4	0.99992	0.99992	1	19039	0	2.61	0.012662	0.02359	0.73191	613	2	2.61
IFT46	4	0.40061	0.59672	1	10965	2	0.29441	0.012716	0.023693	0.733901	614	1	0.29441
CRMP1	4	0.45508	0.6363	1	11620	2	1.0917	0.01279	0.023827	0.735014	615	2	1.0917
POTEF	4	0.95884	0.95886	1	17618	0	1.783	0.012806	0.023859	0.735014	616	2	1.783
NICN1	4	0.065599	0.18042	0.89937	3820	3	-0.99402	0.012819	0.023881	0.735014	617	1	-0.99402
UBE3D	4	0.64105	0.77706	1	14087	2	1.2205	0.012843	0.023927	0.735014	618	2	1.2205
GNL2	4	0.11987	0.26733	0.951252	5349	2	0.19086	0.01287	0.023972	0.735014	619	1	0.19086
TRIM59	4	0.17482	0.34935	0.988906	6736	1	1.2232	0.01287	0.023972	0.735014	620	2	1.2232
MPEG1	4	0.99863	0.9986	1	18857	0	1.9949	0.012884	0.023998	0.735014	621	2	1.9949
CXADR	4	0.93873	0.93879	1	17148	0	0.25135	0.013024	0.024159	0.738764	622	1	0.25135
LOC391003	4	0.64416	0.77951	1	14133	2	0.5133	0.013076	0.024199	0.738802	623	1	0.5133
GJB7	4	0.73735	0.82935	1	15036	1	0.65829	0.013127	0.024239	0.73884	624	1	0.65829
LURAP1	4	0.4522	0.63417	1	11579	2	0.19172	0.013178	0.024281	0.73894	625	1	0.19172
FITM2	4	0.13131	0.2848	0.964974	5632	2	0.15771	0.013281	0.024379	0.740696	626	1	0.15771
C4orf48	4	0.054712	0.15621	0.884054	3373	3	-0.84988	0.013332	0.024416	0.740696	627	1	-0.84988
SLC18A3	4	0.61061	0.75353	1	13690	1	0.98661	0.013383	0.024463	0.740935	628	1	0.98661
IFNA14	4	0.91068	0.91417	1	16701	1	0.50904	0.013486	0.024553	0.742504	629	1	0.50904
ILVBL	4	0.99638	0.9964	1	18693	0	1.2856	0.013537	0.024602	0.742817	630	1	1.2856
INTS4	4	0.019527	0.062311	0.782084	1507	2	0.33535	0.01364	0.024686	0.744159	631	1	0.33535
KIF2B	4	0.98556	0.98554	1	18322	0	1.8866	0.013691	0.024734	0.744438	632	1	1.8866
PLEKHH2	4	0.96792	0.96798	1	17857	0	0.61504	0.013743	0.024777	0.744559	633	1	0.61504
OR10J5	4	0.013845	0.045328	0.756545	1141	3	-0.4961	0.013794	0.024825	0.74482	634	1	-0.4961
UTP14A	4	0.67966	0.80738	1	14609	1	0.55335	0.013845	0.024871	0.745034	635	1	0.55335
PLD3	4	0.4401	0.62539	1	11440	1	0.21402	0.013897	0.024918	0.745278	636	1	0.21402
PSMB10	4	0.13308	0.28745	0.966525	5674	2	-0.27178	0.01405	0.025053	0.748136	637	1	-0.27178
SPTBN5	4	0.77063	0.84135	1	15254	1	0.5594	0.014256	0.025242	0.752622	638	1	0.5594
LRRC37A	4	0.8922	0.90098	1	16440	1	0.66907	0.014358	0.025337	0.754257	639	1	0.66907
KRTAP15_1	4	0.46774	0.6456	1	11790	2	0.35646	0.014409	0.025384	0.754485	640	1	0.35646
ZSWIM7	4	0.99839	0.99837	1	18827	0	1.5616	0.014461	0.025428	0.75462	641	1	1.5616
PPP2R5D	4	0.99144	0.99147	1	18505	0	0.91975	0.014614	0.025568	0.757595	642	1	0.91975
H2AFX	4	0.24074	0.44084	1	8358	2	0.48536	0.014768	0.025708	0.76056	643	1	0.48536
PKP4	4	0.98115	0.98117	1	18197	0	0.65897	0.014819	0.025759	0.7609	644	1	0.65897
DUSP1	4	0.10452	0.24338	0.944851	4912	3	-0.53552	0.014871	0.025814	0.761345	645	1	-0.53552
GTSF1L	4	0.88238	0.89462	1	16302	1	1.3206	0.014922	0.025869	0.761789	646	1	1.3206
APOA1BP	4	0.29357	0.50973	1	9545	2	0.70577	0.014973	0.025916	0.762018	647	1	0.70577
DSP	4	0.12995	0.28274	0.963302	5599	2	-0.025512	0.015076	0.026005	0.763464	648	1	-0.025512
CFDP1	4	0.29862	0.51611	1	9640	3	-0.2888	0.015127	0.026049	0.763568	649	1	-0.2888
TCN1	4	0.99873	0.99871	1	18865	0	1.5516	0.015229	0.026117	0.764385	650	1	1.5516
MAFF	4	0.5307	0.69261	1	12599	2	0.35927	0.015281	0.026161	0.764503	651	1	0.35927
CENPB	4	0.73846	0.82972	1	15045	1	1.4105	0.015691	0.026546	0.771051	652	1	1.4105
AAMP	4	0.65332	0.78663	1	14246	2	0.57282	0.015691	0.026546	0.771051	653	1	0.57282
CENPP	4	0.0008566	0.0031049	0.427192	137	2	-1.3789	0.015691	0.026546	0.771051	654	1	-1.3789
RRP9	4	0.29677	0.5138	1	9608	3	-0.37124	0.015691	0.026546	0.771051	655	1	-0.37124
SLC9A3	4	0.61529	0.75715	1	13756	1	1.5899	0.015998	0.026826	0.778009	656	1	1.5899
PLEKHG6	4	0.19899	0.38357	0.997455	7339	2	-0.46512	0.016049	0.026878	0.77833	657	1	-0.46512
ASUN	4	0.88788	0.89813	1	16376	1	0.06653	0.0161	0.026928	0.778492	658	1	0.06653
TRIM49D1	4	0.25681	0.46224	1	8735	2	0.086996	0.016152	0.026965	0.778492	659	1	0.086996
WDR17	4	0.14162	0.3004	0.970989	5900	3	-0.39352	0.016254	0.027054	0.779871	660	1	-0.39352
DCTD	4	0.90627	0.91087	1	16644	1	0.34075	0.016305	0.027099	0.779994	661	1	0.34075
GPR22	4	0.45729	0.63794	1	11657	2	-0.06743	0.016408	0.027185	0.781292	662	1	-0.06743
FTMT	4	0.58316	0.73238	1	13320	2	0.23555	0.016459	0.027238	0.781443	663	1	0.23555
HIST1H3D	4	0.42782	0.61653	1	11274	2	0.21437	0.01651	0.027272	0.781443	664	1	0.21437
C9orf72	4	0.21992	0.41268	0.999445	7879	3	-0.1738	0.016663	0.027416	0.784394	665	1	-0.1738
CLEC6A	4	0.54683	0.70472	1	12817	1	0.77876	0.016715	0.027461	0.784494	666	1	0.77876
MCM7	3	0.84047	0.84329	1	15832	1	0.30713	0.016758	0.021875	0.724091	667	1	0.30713
RRP7A	4	0.9493	0.94935	1	17386	0	1.6783	0.016817	0.027547	0.785791	668	1	1.6783
OR56A4	4	0.58198	0.73148	1	13304	2	-0.13978	0.016868	0.02759	0.78583	669	1	-0.13978
LAMTOR5	4	0.99254	0.99257	1	18539	0	1.6432	0.016971	0.027681	0.787269	670	1	1.6432
IFT20	4	0.99059	0.99058	1	18476	0	1.414	0.017022	0.02773	0.787482	671	1	1.414
FRMD1	4	0.78556	0.8472	1	15359	1	0.50692	0.017124	0.027825	0.789016	672	1	0.50692
ROBO3	4	0.4114	0.60461	1	11079	2	0.99872	0.017175	0.027869	0.789094	673	1	0.99872
NGEF	4	0.24334	0.44428	1	8422	3	-0.12223	0.017226	0.027912	0.789128	674	1	-0.12223
NPAS4	4	0.93755	0.93764	1	17127	0	0.91404	0.017278	0.027958	0.789264	675	1	0.91404
ZNF391	4	0.08668	0.21513	0.924777	4440	3	-0.82061	0.017329	0.028007	0.789473	676	1	-0.82061
USP24	4	0.72382	0.8249	1	14937	1	0.084935	0.017482	0.028125	0.791649	677	1	0.084935
CHD2	4	0.64608	0.78103	1	14155	2	0.25056	0.017584	0.028216	0.792857	678	1	0.25056
GFRA1	4	0.21942	0.41201	0.999188	7866	2	0.35105	0.017636	0.028251	0.792857	679	1	0.35105
DNAL1	4	0.53727	0.69746	1	12689	2	0.016589	0.017738	0.028346	0.794193	680	1	0.016589
CEP89	4	0.39208	0.59048	1	10864	1	1.2533	0.017789	0.028389	0.794193	681	1	1.2533
MYLK	4	0.4347	0.62144	1	11364	2	0.7516	0.017891	0.028473	0.794193	682	1	0.7516
CDC7	2	0.13083	0.21684	0.926619	5620	1	0.23857	0.018124	0.019558	0.701308	683	1	0.23857
TAS2R16	4	0.99672	0.99675	1	18707	0	1.0316	0.018147	0.028714	0.794193	684	1	1.0316
EXOSC2	4	0.27566	0.48679	1	9174	3	-1.2398	0.018147	0.028714	0.794193	685	1	-1.2398
SRSF7	4	0.13814	0.29517	0.968948	5808	3	-1.8524	0.018147	0.028714	0.794193	686	1	-1.8524
SFPQ	4	0.40208	0.59784	1	10980	1	-0.88124	0.018147	0.028714	0.794193	687	1	-0.88124
ABT1	4	0.65178	0.78546	1	14216	2	0.038899	0.018147	0.028714	0.794193	688	1	0.038899
DUSP19	4	0.93041	0.93082	1	17009	1	0.92607	0.018147	0.028714	0.794193	689	1	0.92607
CDAN1	4	0.50986	0.67703	1	12342	2	-0.14102	0.018147	0.028714	0.794193	690	1	-0.14102
EEF1G	4	0.11675	0.26247	0.950301	5269	3	-0.71022	0.018403	0.028935	0.799087	691	1	-0.71022
TBL3	3	0.84536	0.84754	1	15880	1	1.037	0.01843	0.023393	0.729548	692	1	1.037
ITGB3BP	4	0.011198	0.037174	0.731679	970	3	-1.3095	0.018454	0.028975	0.799087	693	1	-1.3095
MYC	4	0.22673	0.42193	1	8041	1	0.73724	0.018505	0.029031	0.799332	694	1	0.73724
SHROOM4	4	0.98344	0.98343	1	18253	0	0.75235	0.018607	0.029115	0.799332	695	1	0.75235
NFKBID	4	0.92064	0.92224	1	16864	1	0.48471	0.018658	0.02916	0.799332	696	1	0.48471
USP17L17	4	0.010893	0.036247	0.731229	942	3	-1.4905	0.018709	0.029196	0.799332	697	1	-1.4905
ASPHD2	4	0.77455	0.84283	1	15285	1	0.45474	0.01876	0.029237	0.799332	698	1	0.45474
APLN	4	0.0031019	0.010959	0.595902	349	3	-1.3825	0.018811	0.02928	0.799332	699	1	-1.3825
KIAA0020	4	0.38635	0.58632	1	10777	2	0.017703	0.018863	0.029318	0.799332	700	1	0.017703
NENF	4	0.29568	0.51241	1	9584	2	0.76755	0.018965	0.029414	0.800788	701	1	0.76755
FAM110D	4	0.59899	0.74453	1	13544	1	0.44046	0.019016	0.029463	0.800987	702	1	0.44046
CYB5R4	4	0.0036199	0.01273	0.597572	398	3	-1.8412	0.019067	0.029511	0.801143	703	1	-1.8412
BZW2	4	0.52467	0.68818	1	12535	2	0.42476	0.019169	0.029588	0.8021	704	1	0.42476
NPW	4	0.53196	0.69354	1	12623	2	-0.19741	0.01922	0.029635	0.80224	705	1	-0.19741
SNX8	4	0.59176	0.739	1	13447	2	-0.0072755	0.019271	0.029686	0.802477	706	1	-0.0072755
NOP14	4	0.60885	0.75217	1	13666	2	0.80899	0.019322	0.02974	0.802812	707	1	0.80899
UGT1A3	4	0.94025	0.94034	1	17181	0	0.56767	0.019373	0.029787	0.802951	708	1	0.56767
MS4A6E	4	0.98138	0.9814	1	18200	0	1.9628	0.019476	0.029875	0.804059	709	1	1.9628
IFNA6	4	0.30086	0.51894	1	9685	3	-0.10874	0.019527	0.029915	0.804059	710	1	-0.10874
PRKAR1B	4	0.41718	0.60875	1	11154	1	0.81152	0.019578	0.029954	0.804059	711	1	0.81152
TTC31	4	0.71413	0.82173	1	14882	1	0.90577	0.019629	0.030001	0.804181	712	1	0.90577
CBWD2	4	0.8557	0.8792	1	15996	1	0.12129	0.01968	0.030047	0.804289	713	1	0.12129
RGPD6	4	0.85305	0.87775	1	15962	1	1.3544	0.019782	0.030151	0.805934	714	1	1.3544
ADGRG2	4	0.55741	0.71272	1	12972	1	1.0808	0.019833	0.030199	0.806094	715	1	1.0808
BAALC	4	0.65592	0.78869	1	14281	1	0.87187	0.019884	0.03025	0.806337	716	1	0.87187
UTP23	4	0.95827	0.95829	1	17601	0	0.28028	0.019961	0.03031	0.8068	717	1	0.28028
CXorf65	4	0.62335	0.76337	1	13858	1	0.47169	0.020088	0.030427	0.808633	718	1	0.47169
DHODH	4	0.98221	0.98222	1	18222	0	0.86719	0.020139	0.030467	0.808633	719	1	0.86719
RAD9B	4	0.48971	0.66195	1	12067	2	-0.41952	0.020191	0.030506	0.808633	720	1	-0.41952
TRMT5	4	0.13047	0.28351	0.963628	5614	2	0.025821	0.020293	0.030597	0.809927	721	1	0.025821
DUSP12	4	0.11293	0.25661	0.94914	5160	2	0.7452	0.020344	0.030642	0.809987	722	1	0.7452
EDF1	4	0.25133	0.455	1	8608	3	-0.36706	0.020395	0.030684	0.809987	723	1	-0.36706
SDAD1	4	0.11987	0.26733	0.951252	5362	1	0.80051	0.020471	0.030748	0.810563	724	1	0.80051
NMD3	4	0.53861	0.69846	1	12708	2	0.4675	0.020548	0.030812	0.811098	725	1	0.4675
HAUS1	4	0.96509	0.96514	1	17779	0	1.0022	0.020599	0.030853	0.811098	726	1	1.0022
TRDN	4	0.87942	0.89285	1	16261	1	0.22157	0.02065	0.0309	0.811209	727	1	0.22157
SDE2	4	0.013271	0.043554	0.750437	1099	2	-0.66766	0.020701	0.030942	0.811209	728	1	-0.66766
KCNC3	4	0.1121	0.25533	0.947456	5143	2	0.025186	0.020803	0.031026	0.812295	729	1	0.025186
NUP205	4	0.0031611	0.011178	0.597572	354	3	-1.9093	0.021058	0.031253	0.815986	730	1	-1.9093
SLC33A1	4	0.037583	0.11228	0.844097	2527	3	-1.8859	0.021058	0.031253	0.815986	731	1	-1.8859
GAS2L1	4	0.96371	0.96375	1	17738	0	0.71158	0.021262	0.031436	0.81955	732	1	0.71158
USP15	4	0.83048	0.86665	1	15740	1	1.7898	0.021313	0.031475	0.81955	733	1	1.7898
HIST1H2BL	4	0.051907	0.14914	0.879588	3233	2	0.1158	0.021364	0.031518	0.819553	734	1	0.1158
KRTAP5_5	4	0.18796	0.36806	0.993484	7071	2	-0.23468	0.021517	0.03165	0.82187	735	1	-0.23468
OR4F17	4	0.97998	0.98006	1	18170	0	0.90833	0.021568	0.031696	0.821937	736	1	0.90833
SPATA22	4	0.51562	0.6813	1	12409	1	1.6209	0.021619	0.031742	0.82203	737	1	1.6209
CETP	4	0.27454	0.48536	1	9147	3	-0.20608	0.021721	0.031833	0.823276	738	1	-0.20608
KCNJ15	4	0.80854	0.85668	1	15554	1	0.55312	0.021823	0.031919	0.824167	739	1	0.55312
SRP54	4	0.47738	0.65283	1	11899	2	-0.52283	0.021874	0.031954	0.824167	740	1	-0.52283
DAG1	4	0.51103	0.67788	1	12356	1	0.64065	0.021976	0.032051	0.825538	741	1	0.64065
CD1D	4	0.24707	0.44931	1	8511	3	-0.31485	0.022078	0.032146	0.826879	742	1	-0.31485
CCDC181	4	0.81462	0.85933	1	15601	1	0.13527	0.022129	0.032198	0.827078	743	1	0.13527
C11orf73	4	0.99861	0.99857	1	18854	0	1.3709	0.02218	0.03224	0.827078	744	1	1.3709
CYP4A22	4	0.018224	0.058508	0.775588	1429	3	-0.17166	0.022409	0.032448	0.831292	745	1	-0.17166
HSDL2	4	0.011149	0.037027	0.731229	962	2	-0.11524	0.022486	0.032511	0.831743	746	1	-0.11524
LRRCC1	4	0.62727	0.76643	1	13915	1	1.0746	0.022537	0.032556	0.831743	747	1	1.0746
SF3B4	4	0.23162	0.42856	1	8154	1	-0.002793	0.022588	0.032602	0.831743	748	1	-0.002793
XRN2	4	0.64827	0.78272	1	14173	2	-0.26628	0.022639	0.03264	0.831743	749	1	-0.26628
IL17RD	4	0.34812	0.55894	1	10326	2	-0.030773	0.02274	0.032745	0.832148	750	1	-0.030773
UQCRC1	4	0.44485	0.62875	1	11491	2	-0.0302	0.022791	0.032792	0.832148	751	1	-0.0302
IL34	4	0.88836	0.89846	1	16383	1	1.4911	0.022842	0.032833	0.832148	752	1	1.4911
PSMA1	4	0.95852	0.95854	1	17610	0	0.78876	0.022893	0.032876	0.832148	753	1	0.78876
NPHS2	4	0.51328	0.67954	1	12387	1	0.89171	0.022944	0.032917	0.832148	754	1	0.89171
PPP1R15B	4	0.26671	0.47524	1	8969	3	-0.71929	0.022995	0.032972	0.832329	755	1	-0.71929
PDE6G	4	0.92335	0.92458	1	16903	1	1.2961	0.023046	0.033012	0.832329	756	1	1.2961
HIF1A	4	0.54253	0.70147	1	12761	1	1.2021	0.023097	0.033055	0.832329	757	1	1.2021
LSM10	4	0.060469	0.17021	0.893038	3634	1	0.29503	0.023199	0.033156	0.833732	758	1	0.29503
UBD	4	0.031843	0.096792	0.830974	2221	3	-1.1777	0.02325	0.033197	0.833732	759	1	-1.1777
FAM89B	4	0.73831	0.82967	1	15042	1	0.56262	0.023301	0.033253	0.834041	760	1	0.56262
MRPS12	4	0.66832	0.7984	1	14455	2	-0.040262	0.023454	0.033393	0.836407	761	1	-0.040262
FGL1	4	0.15202	0.31586	0.97704	6171	1	1.5633	0.023504	0.033435	0.836407	762	1	1.5633
PCSK4	4	0.5102	0.67727	1	12345	2	0.054687	0.023555	0.033482	0.836491	763	1	0.054687
TUBGCP4	4	0.051907	0.14914	0.879588	3234	1	0.40283	0.023632	0.033549	0.837067	764	1	0.40283
EXOSC9	4	0.17258	0.3461	0.988906	6678	3	-0.6932	0.023708	0.033622	0.837783	765	1	-0.6932
OTOP3	4	0.71656	0.82253	1	14891	1	0.8187	0.023861	0.033735	0.839502	766	1	0.8187
CLDN1	4	0.9599	0.95994	1	17643	0	0.94298	0.023912	0.033779	0.839505	767	1	0.94298
DDN	4	0.20506	0.39212	0.998651	7488	3	-0.42188	0.023963	0.033828	0.839649	768	1	-0.42188
TXNDC5	4	0.0081828	0.027605	0.712266	731	3	-1.0813	0.024014	0.033875	0.839716	769	1	-1.0813
MACF1	4	0.026594	0.082288	0.810602	1930	3	-0.99717	0.024115	0.033955	0.840616	770	1	-0.99717
SPICE1	4	0.16272	0.33177	0.983804	6436	2	-0.11329	0.024166	0.034005	0.840758	771	1	-0.11329
KAT5	4	0.91865	0.92052	1	16837	1	0.35061	0.024497	0.034288	0.842303	772	1	0.35061
LSG1	4	0.077541	0.20015	0.911343	4183	2	-0.019786	0.024497	0.034288	0.842303	773	1	-0.019786
DNAJC11	4	0.28762	0.50222	1	9433	3	-0.75324	0.024497	0.034288	0.842303	774	1	-0.75324
MRPL57	4	0.076296	0.19813	0.910233	4147	3	-0.75966	0.024497	0.034288	0.842303	775	1	-0.75966
SHQ1	4	0.085517	0.21324	0.923307	4405	3	-1.0091	0.024497	0.034288	0.842303	776	1	-1.0091
NOL7	3	0.11206	0.24342	0.944851	5139	1	0.36681	0.024541	0.029071	0.799332	777	1	0.36681
NUDT9	4	0.19368	0.37608	0.993854	7224	3	-0.49054	0.024929	0.034684	0.850945	778	1	-0.49054
NEDD8	4	0.30793	0.52775	1	9833	3	-0.29215	0.025031	0.03478	0.852202	779	1	-0.29215
LIN9	4	0.30534	0.52453	1	9776	2	0.049575	0.025082	0.034827	0.852265	780	1	0.049575
ABCA1	4	0.81788	0.86078	1	15625	1	0.63507	0.025133	0.034878	0.852416	781	1	0.63507
GPR75_ASB3	4	0.87231	0.88861	1	16182	1	0.81686	0.025209	0.034939	0.852819	782	1	0.81686
KIN	4	0.088349	0.21786	0.926882	4483	3	-0.75304	0.025336	0.035051	0.854459	783	1	-0.75304
PEX10	4	0.27277	0.48315	1	9102	3	-0.16693	0.025438	0.035136	0.855245	784	1	-0.16693
UBE2F	4	0.98722	0.98718	1	18361	0	1.5412	0.025489	0.035173	0.855245	785	1	1.5412
PHC2	4	0.2687	0.47777	1	9009	2	0.073747	0.02559	0.035258	0.856222	786	1	0.073747
DDX23	4	0.077811	0.20058	0.911584	4193	3	-0.94984	0.025895	0.035526	0.861555	787	1	-0.94984
KRT222	4	0.97793	0.97811	1	18117	0	0.79112	0.025946	0.03557	0.861555	788	1	0.79112
GOLGA4	4	0.22017	0.41301	0.999468	7885	2	-0.13319	0.025997	0.035613	0.861555	789	1	-0.13319
FAH	4	0.11676	0.26249	0.950301	5272	2	0.54567	0.02615	0.035733	0.86337	790	1	0.54567
NOM1	4	0.22985	0.42614	1	8111	2	-0.37528	0.026251	0.035829	0.864015	791	1	-0.37528
CTDNEP1	4	0.99979	0.99979	1	19006	0	2.1505	0.026302	0.03587	0.864015	792	1	2.1505
DGKA	4	0.0012782	0.0045985	0.484142	181	3	-1.8091	0.026404	0.035955	0.864015	793	1	-1.8091
ITGB6	4	0.91809	0.92004	1	16828	1	0.3713	0.026454	0.035999	0.864015	794	1	0.3713
KRTAP4_6	4	0.98924	0.98923	1	18422	0	1.7879	0.026505	0.036034	0.864015	795	1	1.7879
CENPI	4	0.017822	0.057367	0.775588	1406	3	-1.7479	0.026556	0.036079	0.864015	796	1	-1.7479
BOP1	4	0.92483	0.92584	1	16929	1	1.1691	0.026607	0.036129	0.864015	797	1	1.1691
RHEB	4	0.319	0.53816	1	9998	1	0.9444	0.026658	0.036173	0.864015	798	1	0.9444
SIRPA	4	0.96257	0.96259	1	17702	0	1.1868	0.026708	0.036223	0.864015	799	1	1.1868
DDX42	4	0.68096	0.8084	1	14628	2	0.01971	0.026759	0.036264	0.864015	800	1	0.01971
PLEKHF2	4	0.13987	0.29778	0.968948	5860	2	-0.44591	0.02681	0.036304	0.864015	801	1	-0.44591
LRRK2	4	0.034596	0.10435	0.83905	2371	3	-0.78017	0.026861	0.036347	0.864015	802	1	-0.78017
NOP2	4	0.98988	0.98984	1	18448	0	1.156	0.026912	0.036397	0.864135	803	1	1.156
CCDC53	4	0.045717	0.13352	0.86614	2938	3	-1.1369	0.027064	0.036517	0.865834	804	1	-1.1369
CSH1	4	0.95637	0.9564	1	17566	0	1.5123	0.027115	0.03656	0.865834	805	1	1.5123
PPT1	4	0.38455	0.58503	1	10761	2	0.09115	0.027216	0.036659	0.867115	806	1	0.09115
BRWD3	4	0.53921	0.69894	1	12715	2	-0.082634	0.027368	0.036791	0.869081	807	1	-0.082634
SOCS1	4	0.35183	0.56161	1	10366	2	-0.19677	0.027419	0.036833	0.869081	808	1	-0.19677
HEBP1	4	0.19739	0.38128	0.996791	7299	1	1.2788	0.027521	0.03693	0.869344	809	1	1.2788
BASP1	4	0.77415	0.84267	1	15280	1	0.64526	0.027572	0.036975	0.869344	810	1	0.64526
UNC13A	4	0.30279	0.52133	1	9718	1	0.83868	0.027622	0.037021	0.869344	811	1	0.83868
ZNF131	4	0.34139	0.55417	1	10244	2	-0.48669	0.027673	0.037062	0.869344	812	1	-0.48669
VCPKMT	4	0.89995	0.90628	1	16546	1	0.90319	0.027724	0.037103	0.869344	813	1	0.90319
PLA2G15	4	0.26862	0.47766	1	9007	2	0.97721	0.027775	0.037148	0.869344	814	1	0.97721
LIX1L	4	0.31505	0.53538	1	9948	1	1.4162	0.027825	0.037188	0.869344	815	1	1.4162
MIS12	4	0.80716	0.85611	1	15541	1	0.56665	0.027901	0.037256	0.869344	816	1	0.56665
SMN1	4	0.67684	0.80518	1	14575	2	0.56821	0.027901	0.037256	0.869344	817	1	0.56821
GNG3	4	0.4404	0.62562	1	11444	1	0.13305	0.027978	0.037326	0.869344	818	1	0.13305
RBM24	4	0.99127	0.99129	1	18497	0	1.5384	0.028028	0.037373	0.869344	819	1	1.5384
NOP9	4	0.95622	0.95625	1	17562	0	0.86857	0.028104	0.037436	0.869344	820	1	0.86857
TMEM133	4	0.67005	0.79976	1	14476	2	0.63349	0.028104	0.037436	0.869344	821	1	0.63349
ROR2	4	0.52233	0.68642	1	12504	1	1.0363	0.028181	0.037494	0.869635	822	1	1.0363
RAB9B	4	0.29462	0.51108	1	9560	3	-0.10635	0.028282	0.037577	0.870501	823	1	-0.10635
VIT	4	0.55756	0.71285	1	12975	2	0.78912	0.028434	0.037713	0.8726	824	1	0.78912
SRSF3	3	0.58505	0.6907	1	13349	1	0.47348	0.028532	0.03274	0.832148	825	1	0.47348
GANAB	4	0.9327	0.93292	1	17046	1	0.83358	0.028536	0.037788	0.873266	826	1	0.83358
SNW1	4	0.91489	0.91749	1	16772	1	0.45614	0.028586	0.037833	0.873266	827	1	0.45614
HSPG2	4	0.092862	0.22512	0.932861	4605	2	0.7064	0.028789	0.038013	0.873797	828	1	0.7064
EDC4	4	0.99429	0.99432	1	18602	0	1.1561	0.02884	0.03806	0.873797	829	1	1.1561
SH3TC1	4	0.068335	0.18494	0.902778	3901	3	-0.70594	0.028891	0.038098	0.873797	830	1	-0.70594
FBXO47	4	0.89008	0.89958	1	16409	1	0.99145	0.028941	0.038143	0.873797	831	1	0.99145
KCNK10	4	0.090123	0.22069	0.928014	4536	3	-0.91578	0.028992	0.038194	0.873797	832	1	-0.91578
HBEGF	4	0.39294	0.59114	1	10874	2	-0.093831	0.029043	0.038234	0.873797	833	1	-0.093831
OR5B17	4	0.99026	0.99025	1	18463	0	1.4055	0.029093	0.038285	0.873797	834	1	1.4055
RNF112	4	0.98244	0.98246	1	18233	0	0.90333	0.029144	0.038328	0.873797	835	1	0.90333
WDR36	4	0.86723	0.88563	1	16125	1	0.81247	0.02955	0.038679	0.873797	836	1	0.81247
TINF2	4	0.029919	0.091559	0.82355	2117	3	-1.1877	0.02955	0.038679	0.873797	837	1	-1.1877
PAXBP1	4	0.30334	0.52201	1	9734	1	0.57409	0.02955	0.038679	0.873797	838	1	0.57409
RFT1	4	0.18848	0.36881	0.993484	7081	3	-0.92656	0.02955	0.038679	0.873797	839	1	-0.92656
FAAH2	4	0.049988	0.14429	0.8739	3142	2	-0.13405	0.02955	0.038679	0.873797	840	1	-0.13405
DIS3	4	0.19602	0.37938	0.995738	7269	3	-0.94328	0.02955	0.038679	0.873797	841	1	-0.94328
WDR46	4	0.70197	0.81792	1	14793	1	0.45808	0.02955	0.038679	0.873797	842	1	0.45808
TUBD1	4	0.14568	0.30644	0.972744	6012	2	-0.40052	0.02955	0.038679	0.873797	843	1	-0.40052
TDRD12	4	0.25177	0.45559	1	8613	1	0.87542	0.02955	0.038679	0.873797	844	1	0.87542
ZDHHC23	4	0.12603	0.27675	0.959761	5506	2	-0.49534	0.02955	0.038679	0.873797	845	1	-0.49534
SLC22A17	4	0.23419	0.43208	1	8208	3	-0.3606	0.030056	0.039136	0.883076	846	1	-0.3606
SPDYE3	4	0.70391	0.81849	1	14806	1	0.69936	0.030158	0.039218	0.883879	847	1	0.69936
SLC17A3	4	0.010797	0.035955	0.731229	936	3	-1.4384	0.030208	0.039266	0.883923	848	1	-1.4384
GRIA2	4	0.98491	0.9849	1	18306	0	1.3815	0.03031	0.039365	0.88501	849	1	1.3815
TRIM31	4	0.74709	0.8328	1	15097	1	0.7082	0.03036	0.039407	0.88501	850	1	0.7082
RPP40	4	0.41399	0.60646	1	11114	1	0.37074	0.030462	0.039487	0.885761	851	1	0.37074
ZNF385C	4	0.99679	0.99683	1	18711	0	1.5977	0.030563	0.039586	0.886951	852	1	1.5977
SIX6	4	0.44657	0.63001	1	11513	2	0.075438	0.030614	0.039635	0.887	853	1	0.075438
MORC1	4	0.065519	0.1803	0.89937	3816	2	-0.20281	0.030664	0.039683	0.887	854	1	-0.20281
TRABD2B	4	0.12266	0.27157	0.956545	5420	3	-0.55276	0.030715	0.039728	0.887	855	1	-0.55276
NOX4	4	0.28317	0.49656	1	9344	1	0.90215	0.030816	0.039802	0.887629	856	1	0.90215
LOC101060321	4	0.99926	0.99926	1	18921	0	1.5451	0.030867	0.039853	0.887725	857	1	1.5451
NAIF1	4	0.0039336	0.013764	0.597572	433	3	-1.0909	0.030917	0.039902	0.887775	858	1	-1.0909
ZNF665	4	0.45478	0.63605	1	11614	2	0.39281	0.031019	0.039997	0.888235	859	1	0.39281
UBE2C	4	0.97943	0.97956	1	18156	0	1.1102	0.031069	0.04004	0.888235	860	1	1.1102
BCKDHB	4	0.20966	0.39863	0.998651	7598	3	-0.31393	0.03117	0.04014	0.888949	861	1	-0.31393
ASAH2B	4	0.5854	0.73411	1	13354	1	0.081481	0.031272	0.040224	0.889527	862	1	0.081481
SYCE2	4	0.022414	0.070576	0.79398	1687	3	-0.99512	0.031322	0.04026	0.889527	863	1	-0.99512
BECN1	4	0.99495	0.99496	1	18628	0	1.6019	0.031474	0.040389	0.891358	864	1	1.6019
BUB1	4	0.14629	0.30732	0.972744	6026	3	-0.88063	0.031601	0.040499	0.892762	865	1	-0.88063
OR8U1	4	0.96335	0.96337	1	17725	0	1.704	0.031677	0.040565	0.892927	866	1	1.704
MED14	4	0.01628	0.052847	0.765762	1305	2	-0.42695	0.031727	0.040605	0.892927	867	1	-0.42695
SAMM50	4	0.29978	0.51761	1	9655	3	-1.0818	0.031778	0.040647	0.892927	868	1	-1.0818
CEP162	4	0.52267	0.68669	1	12508	2	0.67451	0.031879	0.040734	0.893812	869	1	0.67451
OTULIN	4	0.67691	0.80523	1	14576	2	0.43064	0.03198	0.040814	0.894535	870	1	0.43064
PSG2	4	0.31588	0.53596	1	9964	1	0.44806	0.032081	0.040904	0.895445	871	1	0.44806
MAGEB10	4	0.54067	0.70004	1	12732	1	1.253	0.032132	0.040949	0.895445	872	1	1.253
PRKAG3	4	0.71043	0.82054	1	14858	1	1.0289	0.032233	0.04105	0.896568	873	1	1.0289
RNF103	4	0.99237	0.99239	1	18534	0	1.3141	0.032284	0.041097	0.896568	874	1	1.3141
ATP2A2	3	0.87508	0.87521	1	16213	0	1.045	0.032302	0.036229	0.864015	875	1	1.045
SYK	4	0.15213	0.31604	0.97704	6177	3	-0.3992	0.032385	0.041182	0.896568	876	1	-0.3992
C9orf131	4	0.21447	0.40529	0.998651	7731	2	-0.2554	0.032435	0.041232	0.896568	877	1	-0.2554
C10orf71	4	0.24308	0.44395	1	8417	1	0.055641	0.032486	0.041283	0.896568	878	1	0.055641
CBWD5	4	0.80019	0.85316	1	15476	1	1.2055	0.032536	0.041329	0.896568	879	1	1.2055
OR5J2	4	0.99994	0.99994	1	19053	0	1.9744	0.032638	0.041415	0.897143	880	1	1.9744
ZNF143	4	0.87063	0.88761	1	16166	1	1.2147	0.032688	0.041455	0.897143	881	1	1.2147
RAP2A	4	0.96845	0.96852	1	17870	0	1.1354	0.032739	0.041496	0.897143	882	1	1.1354
SRR	4	0.56068	0.71523	1	13017	2	0.033847	0.03284	0.041582	0.897986	883	1	0.033847
TBPL2	4	0.98394	0.98394	1	18271	0	1.4764	0.032991	0.041725	0.900046	884	1	1.4764
POP4	4	0.5239	0.68762	1	12524	2	-0.48136	0.033244	0.041948	0.903842	885	1	-0.48136
TMPRSS11E	4	0.044579	0.13064	0.865189	2874	3	-0.78588	0.033547	0.04222	0.907589	886	1	-0.78588
AFM	4	0.38872	0.58804	1	10810	2	-0.11385	0.033598	0.042261	0.907589	887	1	-0.11385
GBA2	4	0.065457	0.1802	0.89937	3811	2	-0.33051	0.033648	0.042303	0.907589	888	1	-0.33051
CEP295	4	0.93227	0.93252	1	17040	1	0.60641	0.033724	0.042373	0.907589	889	1	0.60641
STXBP5	4	0.013271	0.043554	0.750437	1101	2	-0.62593	0.0338	0.042438	0.907589	890	1	-0.62593
CCDC30	4	0.6244	0.7642	1	13876	1	0.33145	0.03385	0.042484	0.907589	891	1	0.33145
TBC1D32	4	0.98752	0.9875	1	18371	0	0.69298	0.033901	0.042526	0.907589	892	1	0.69298
CD207	4	0.1458	0.3066	0.972744	6015	3	-0.39307	0.033951	0.042574	0.907589	893	1	-0.39307
PEX2	4	0.98443	0.98441	1	18281	0	0.72262	0.034002	0.042624	0.907589	894	1	0.72262
LRCH4	4	0.0048472	0.016833	0.644267	494	2	0.0053848	0.034103	0.042722	0.907589	895	1	0.0053848
RHBG	4	0.32776	0.54436	1	10098	2	0.40846	0.034153	0.042766	0.907589	896	1	0.40846
PCDHGA12	4	0.94605	0.94608	1	17316	0	0.82307	0.034305	0.042886	0.90829	897	1	0.82307
ZNF232	4	0.68581	0.8122	1	14696	1	0.87893	0.034355	0.04293	0.90829	898	1	0.87893
PLA2G12A	4	0.083936	0.21066	0.921409	4354	3	-0.49217	0.034406	0.042977	0.90829	899	1	-0.49217
ANKRD34B	4	0.96417	0.96422	1	17750	0	0.85282	0.034456	0.043019	0.90829	900	1	0.85282
DHX58	4	0.58626	0.73476	1	13366	2	0.39293	0.034507	0.043063	0.90829	901	1	0.39293
LIMD1	4	0.36616	0.57189	1	10552	1	0.052544	0.034557	0.04311	0.90829	902	1	0.052544
RSRC1	4	0.0018748	0.0066712	0.535714	238	3	-1.8507	0.034608	0.043152	0.90829	903	1	-1.8507
CDC73	4	0.29389	0.51013	1	9550	2	0.0961	0.034759	0.043288	0.910135	904	1	0.0961
HNRNPA1L2	4	0.17738	0.35296	0.988906	6811	2	0.15268	0.03481	0.043335	0.910135	905	1	0.15268
SAP18	4	0.44682	0.63019	1	11515	2	0.27361	0.03486	0.043385	0.91019	906	1	0.27361
LSAMP	4	0.11935	0.26652	0.951252	5335	2	0.29628	0.034961	0.043482	0.911211	907	1	0.29628
TMEM176A	4	0.033547	0.10154	0.835615	2316	1	1.0619	0.035113	0.043622	0.912552	908	1	1.0619
C10orf99	4	0.032759	0.099345	0.833318	2271	3	-0.86929	0.035163	0.043669	0.912552	909	1	-0.86929
SPG7	4	0.55813	0.71328	1	12982	2	0.03241	0.035214	0.043725	0.912552	910	1	0.03241
MEF2B	4	0.54623	0.70428	1	12810	1	1.0499	0.035264	0.043769	0.912552	911	1	1.0499
SUV39H1	4	0.55493	0.7108	1	12942	1	1.0447	0.035314	0.043809	0.912552	912	1	1.0447
ETNK2	4	0.52259	0.68663	1	12507	1	1.3474	0.035365	0.043855	0.912552	913	1	1.3474
IGBP1	4	0.048391	0.14026	0.868092	3074	2	-0.085079	0.035415	0.043899	0.912552	914	1	-0.085079
RAMP2	4	0.97643	0.97661	1	18069	0	1.5569	0.035466	0.043942	0.912552	915	1	1.5569
HDGFRP3	4	0.034204	0.10332	0.837698	2351	1	1.6925	0.035516	0.043976	0.912552	916	1	1.6925
DDX54	4	0.22985	0.42614	1	8113	2	-0.16882	0.035642	0.044083	0.912806	917	1	-0.16882
HYPK	4	0.44618	0.62974	1	11508	2	0.23623	0.035642	0.044083	0.912806	918	1	0.23623
MOB1B	4	0.26483	0.47285	1	8927	3	-0.084491	0.035718	0.04415	0.9132	919	1	-0.084491
RAB39B	4	0.76249	0.83831	1	15197	1	1.2752	0.035819	0.044233	0.913926	920	1	1.2752
SCAP	4	0.93755	0.93764	1	17126	0	1.0136	0.03592	0.044333	0.915002	921	1	1.0136
CTSH	4	0.74158	0.83083	1	15065	1	0.95564	0.036021	0.044416	0.915374	922	1	0.95564
RGPD8	4	0.87257	0.88876	1	16184	1	1.4146	0.036071	0.044458	0.915374	923	1	1.4146
NKIRAS1	4	0.072968	0.19264	0.909358	4031	3	-0.50316	0.036122	0.044499	0.915374	924	1	-0.50316
RTP4	4	0.24912	0.45208	1	8556	2	0.53657	0.036172	0.044544	0.915374	925	1	0.53657
VIPR1	4	0.60801	0.75152	1	13652	1	0.99215	0.036222	0.04459	0.915374	926	1	0.99215
LRRC14	4	0.22371	0.41786	1	7971	3	-0.33416	0.036374	0.044715	0.916952	927	1	-0.33416
GOLGA8K	4	0.90179	0.90759	1	16577	1	0.43353	0.036424	0.044767	0.91703	928	1	0.43353
RHAG	4	0.58316	0.73238	1	13321	2	0.756	0.036474	0.04482	0.91714	929	1	0.756
CHMP2A	3	0.52085	0.66333	1	12483	1	0.36258	0.036499	0.040062	0.888235	930	1	0.36258
TPD52L1	4	0.83106	0.86693	1	15745	1	0.20634	0.036575	0.044926	0.918185	931	1	0.20634
PRC1	4	0.54346	0.70217	1	12776	2	0.21454	0.036626	0.044968	0.918185	932	1	0.21454
KCNIP3	4	0.97975	0.97986	1	18163	0	0.67412	0.036726	0.045056	0.918277	933	1	0.67412
AKIRIN2	4	0.054122	0.15472	0.882454	3341	2	-0.41887	0.036802	0.045116	0.918277	934	1	-0.41887
CFC1	4	0.095822	0.22982	0.937118	4682	2	-0.50694	0.036802	0.045116	0.918277	935	1	-0.50694
TAS2R13	4	0.043237	0.12717	0.861262	2811	2	0.13228	0.036978	0.045279	0.920377	936	1	0.13228
GOLGA8N	4	0.68462	0.81125	1	14684	2	0.38875	0.037029	0.04533	0.920377	937	1	0.38875
RAD51	4	0.93493	0.93508	1	17089	1	0.36654	0.037079	0.045369	0.920377	938	1	0.36654
ATN1	4	0.080246	0.20464	0.917402	4251	2	0.56222	0.03713	0.045412	0.920377	939	1	0.56222
PRPF3	4	0.033924	0.10254	0.836735	2337	3	-1.1669	0.03723	0.045508	0.920818	940	1	-1.1669
GOLGA6L1	4	0.98885	0.98883	1	18413	0	0.76841	0.037281	0.045547	0.920818	941	1	0.76841
PLXDC1	4	0.9995	0.9995	1	18961	0	1.6956	0.037331	0.045595	0.920818	942	1	1.6956
TCAF1	4	0.4792	0.65418	1	11918	2	0.65057	0.037382	0.045638	0.920818	943	1	0.65057
DCAF4	4	0.70256	0.81809	1	14799	1	0.29746	0.037482	0.045718	0.920818	944	1	0.29746
1_Mar	8	0.83326	0.94309	1	15766	3	0.47385	0.037486	0.066674	0.99491	945	2	0.47385
HNRNPA1	4	0.6905	0.81449	1	14730	1	0.68213	0.037533	0.045768	0.920818	946	1	0.68213
PERP	4	0.040449	0.11989	0.853353	2680	3	-0.6356	0.037583	0.04581	0.920818	947	1	-0.6356
CNPY2	4	0.22128	0.4145	0.999468	7911	3	-0.46163	0.037684	0.045887	0.920818	948	1	-0.46163
TAF6	4	0.091223	0.22252	0.930133	4566	2	0.68507	0.037734	0.045927	0.920818	949	1	0.68507
SNRPD2	3	0.75022	0.77802	1	15117	1	1.6052	0.037806	0.041256	0.896568	950	1	1.6052
NELFE	4	0.908	0.91214	1	16663	1	0.096742	0.037986	0.046149	0.920818	951	1	0.096742
C8orf33	4	0.90191	0.90767	1	16579	1	0.24524	0.038036	0.046197	0.920818	952	1	0.24524
SLC25A41	4	0.090765	0.22172	0.929541	4551	1	1.5875	0.038615	0.046712	0.920818	953	1	1.5875
ZNF260	4	0.056431	0.1605	0.888516	3444	2	0.059101	0.038615	0.046712	0.920818	954	1	0.059101
SNRPC	4	0.8803	0.89337	1	16272	1	1.0848	0.038615	0.046712	0.920818	955	1	1.0848
RPS27	4	0.93755	0.93764	1	17129	0	0.9948	0.038615	0.046712	0.920818	956	1	0.9948
POTEJ	4	0.75693	0.8363	1	15161	1	1.2438	0.038615	0.046712	0.920818	957	1	1.2438
RBBP4	4	0.12202	0.27062	0.95569	5405	2	-0.15701	0.038615	0.046712	0.920818	958	1	-0.15701
NPIPA8	4	0.51364	0.67981	1	12389	2	-0.18448	0.038615	0.046712	0.920818	959	1	-0.18448
PFDN2	4	0.085005	0.2124	0.922208	4393	3	-0.99997	0.038615	0.046712	0.920818	960	1	-0.99997
SLC31A2	4	0.59176	0.739	1	13446	1	0.32253	0.038615	0.046712	0.920818	961	1	0.32253
RPS15	4	0.30963	0.52991	1	9863	3	-0.14635	0.038615	0.046712	0.920818	962	1	-0.14635
SRSF1	4	0.024591	0.076701	0.799315	1824	2	-0.85721	0.038615	0.046712	0.920818	963	1	-0.85721
HIST1H2AI	4	0.026226	0.081273	0.808159	1912	2	-0.75846	0.038615	0.046712	0.920818	964	1	-0.75846
MVD	4	0.30787	0.52768	1	9830	2	0.56495	0.038615	0.046712	0.920818	965	1	0.56495
CNOT3	4	0.80019	0.85316	1	15477	1	0.7751	0.038615	0.046712	0.920818	966	1	0.7751
SLC15A1	4	0.37261	0.57648	1	10624	2	0.3803	0.039194	0.047209	0.929199	967	1	0.3803
POTEB2	4	0.9239	0.92505	1	16909	1	0.39216	0.039395	0.047387	0.931155	968	1	0.39216
HECTD3	4	0.56181	0.71608	1	13039	1	0.47178	0.039445	0.047431	0.931155	969	1	0.47178
WASH1	3	0.49712	0.65205	1	12172	2	-1.4243	0.039454	0.042787	0.907589	970	1	-1.4243
COPS5	3	0.49712	0.65205	1	12173	2	-0.62447	0.039454	0.042787	0.907589	971	1	-0.62447
H3F3A	3	0.46886	0.6241	1	11808	2	-0.68115	0.039454	0.042787	0.907589	972	1	-0.68115
PRELID1	4	0.077419	0.19996	0.911343	4177	2	-0.29067	0.039496	0.047486	0.931155	973	1	-0.29067
RPS3A	4	0.9992	0.9992	1	18914	0	0.89201	0.039571	0.047552	0.931155	974	1	0.89201
NUPR1L	4	0.29121	0.50678	1	9497	1	0.766	0.039571	0.047552	0.931155	975	1	0.766
IL12RB2	4	0.45478	0.63605	1	11615	2	-0.058901	0.039747	0.047717	0.93332	976	1	-0.058901
SFRP4	4	0.98878	0.98877	1	18408	0	0.67636	0.039797	0.04776	0.93332	977	1	0.67636
SMEK2	4	0.95398	0.954	1	17503	0	1.7982	0.039848	0.04781	0.933338	978	1	1.7982
MYL12B	4	0.93438	0.93455	1	17075	1	0.23916	0.039898	0.047861	0.933386	979	1	0.23916
CNPY3	4	0.25394	0.45847	1	8663	2	0.026761	0.039998	0.047953	0.934052	980	1	0.026761
NOVA1	4	0.47161	0.64849	1	11839	2	-0.13888	0.040049	0.047994	0.934052	981	1	-0.13888
ACTL6A	4	0.072453	0.19177	0.909033	4019	2	-0.49306	0.040099	0.048042	0.934052	982	1	-0.49306
KRTAP19_6	4	0.80223	0.85401	1	15494	1	0.34319	0.040199	0.048123	0.934183	983	1	0.34319
CYB561A3	4	0.99724	0.99724	1	18749	0	1.5728	0.04025	0.048158	0.934183	984	1	1.5728
AATF	4	0.99733	0.99732	1	18756	0	1.3075	0.0403	0.048195	0.934183	985	1	1.3075
TAS2R46	4	0.63183	0.76997	1	13970	2	0.12791	0.040451	0.048335	0.935955	986	1	0.12791
EIF3E	4	0.14757	0.30927	0.973779	6058	3	-0.98541	0.040601	0.048469	0.937189	987	1	-0.98541
PLSCR5	4	0.9348	0.93495	1	17086	1	0.65235	0.040652	0.048507	0.937189	988	1	0.65235
MTRNR2L10	4	0.95156	0.95161	1	17441	0	0.80428	0.040702	0.048546	0.937189	989	1	0.80428
MAMDC4	4	0.38635	0.58632	1	10776	2	0.21751	0.040802	0.048632	0.937745	990	1	0.21751
ZNF7	4	0.54272	0.7016	1	12764	2	1.3375	0.040853	0.048673	0.937745	991	1	1.3375
DOCK9	4	0.81635	0.8601	1	15614	1	0.33251	0.040953	0.048768	0.938615	992	1	0.33251
SUCO	4	0.91901	0.92082	1	16842	1	0.64862	0.041054	0.048853	0.938999	993	1	0.64862
USP19	4	0.78747	0.84797	1	15372	1	1.3914	0.041104	0.048898	0.938999	994	1	1.3914
ABCB1	4	0.57297	0.72448	1	13176	1	0.94355	0.041154	0.048935	0.938999	995	1	0.94355
C11orf94	4	0.69499	0.81581	1	14751	1	0.37264	0.041255	0.049027	0.939726	996	1	0.37264
EZH2	4	0.80936	0.85704	1	15560	1	0.90617	0.041305	0.049071	0.939726	997	1	0.90617
CYP2E1	4	0.54345	0.70217	1	12775	1	0.29481	0.041405	0.049165	0.940401	998	1	0.29481
ZC3H12D	4	0.61939	0.76033	1	13802	1	0.4522	0.041455	0.049205	0.940401	999	1	0.4522
RRH	4	0.49954	0.66939	1	12203	2	0.13114	0.041556	0.04929	0.941084	1000	1	0.13114
CARD11	4	0.40807	0.60212	1	11040	2	0.098053	0.041656	0.049386	0.941972	1001	1	0.098053
SUPT6H	4	0.92704	0.92778	1	16955	1	1.881	0.041757	0.049476	0.942371	1002	1	1.881
NDOR1	4	0.008591	0.028925	0.717931	765	3	-1.8639	0.041807	0.049513	0.942371	1003	1	-1.8639
GLB1L2	4	0.16654	0.33734	0.986134	6530	1	0.8502	0.041857	0.04956	0.942371	1004	1	0.8502
CNBD1	4	0.51669	0.68213	1	12426	1	1.3496	0.041907	0.049604	0.942371	1005	1	1.3496
LOC200726	4	0.21888	0.4113	0.998651	7855	2	0.35674	0.042008	0.049689	0.943057	1006	1	0.35674
SLC7A9	4	0.96108	0.96108	1	17673	0	1.3659	0.042108	0.049764	0.943536	1007	1	1.3659
RPL8	4	0.29978	0.51761	1	9662	1	0.37673	0.042208	0.04985	0.944239	1008	1	0.37673
ZNF436	4	0.024058	0.075236	0.797894	1791	3	-1.1558	0.042409	0.050024	0.94641	1009	1	-1.1558
ATP6V0B	4	0.27566	0.48679	1	9176	3	-1.2365	0.042459	0.050074	0.94641	1010	1	-1.2365
C11orf80	4	0.91881	0.92065	1	16840	1	1.0921	0.042509	0.050113	0.94641	1011	1	1.0921
APBB1IP	4	0.17058	0.34321	0.988439	6628	3	-0.13553	0.04256	0.050168	0.946512	1012	1	-0.13553
EOGT	4	0.24239	0.44301	1	8400	3	-0.51138	0.04261	0.050223	0.94654	1013	1	-0.51138
GLYCTK	4	0.073116	0.19288	0.909358	4034	3	-0.64107	0.04266	0.050269	0.94654	1014	1	-0.64107
ILF3	4	0.012665	0.041719	0.743123	1069	3	-1.576	0.042836	0.050435	0.947803	1015	1	-1.576
PWP1	4	0.5991	0.74462	1	13545	2	0.27195	0.042836	0.050435	0.947803	1016	1	0.27195
OR4M2	4	0.66537	0.79605	1	14411	2	0.054451	0.043061	0.050639	0.950704	1017	1	0.054451
KIR3DL3	4	0.059347	0.16748	0.893038	3573	2	-0.43143	0.043212	0.050751	0.95187	1018	1	-0.43143
CUL1	4	0.42898	0.61738	1	11286	2	0.35437	0.043262	0.050807	0.951985	1019	1	0.35437
COPA	4	0.22161	0.41496	0.99955	7923	2	-0.11351	0.043387	0.050919	0.952145	1020	1	-0.11351
DDX10	3	0.82715	0.83225	1	15710	1	0.56794	0.04346	0.046531	0.920818	1021	1	0.56794
PTGES2	4	0.044182	0.12964	0.865189	2854	3	-0.67065	0.043462	0.050986	0.952145	1022	1	-0.67065
RSBN1	4	0.41533	0.6074	1	11132	2	1.0226	0.043513	0.051034	0.952145	1023	1	1.0226
TRIM41	4	0.64618	0.78111	1	14158	2	0.15477	0.043563	0.051074	0.952145	1024	1	0.15477
OXNAD1	4	0.51608	0.68164	1	12417	2	0.079322	0.043613	0.051125	0.952145	1025	1	0.079322
DUX4	3	0.99658	0.99666	1	18700	0	1.1604	0.043667	0.046735	0.920818	1026	1	1.1604
CLDN22	4	0.47013	0.64741	1	11821	2	0.83589	0.043763	0.051264	0.952145	1027	1	0.83589
DDX27	4	0.048391	0.14026	0.868092	3072	3	-0.84711	0.043763	0.051264	0.952145	1028	1	-0.84711
IGFBP4	4	0.038439	0.11455	0.844097	2587	1	1.336	0.043763	0.051264	0.952145	1029	1	1.336
GEMIN8	4	0.88992	0.89946	1	16405	1	0.7581	0.043763	0.051264	0.952145	1030	1	0.7581
FBXO46	4	0.02192	0.069171	0.79398	1648	2	-0.74214	0.043914	0.051397	0.953073	1031	1	-0.74214
PHF5A	4	0.68462	0.81125	1	14688	2	0.039521	0.043964	0.051431	0.953073	1032	1	0.039521
POLR3H	4	0.44923	0.63196	1	11541	2	-0.20563	0.044064	0.051521	0.953073	1033	1	-0.20563
PRND	4	0.12624	0.27705	0.959782	5510	1	0.91808	0.044114	0.051567	0.953073	1034	1	0.91808
TJP3	4	0.95797	0.958	1	17596	0	0.48124	0.044164	0.051606	0.953073	1035	1	0.48124
ADCY7	4	0.11196	0.25512	0.947456	5136	2	-0.40475	0.044214	0.051648	0.953073	1036	1	-0.40475
TRIM33	4	0.10987	0.25177	0.947427	5071	2	0.040261	0.044264	0.05169	0.953073	1037	1	0.040261
TDO2	4	0.32539	0.54265	1	10076	2	-0.11211	0.044314	0.051738	0.953073	1038	1	-0.11211
PIK3R6	4	0.97793	0.97811	1	18116	0	2.6378	0.044365	0.051776	0.953073	1039	1	2.6378
ZBTB46	4	0.42577	0.61501	1	11243	2	0.47726	0.044415	0.051813	0.953073	1040	1	0.47726
FAM193A	4	0.25384	0.45833	1	8658	2	0.38767	0.044515	0.0519	0.953765	1041	1	0.38767
PSMD13	4	0.030791	0.093987	0.827216	2165	1	0.88279	0.044615	0.051978	0.954285	1042	1	0.88279
TDRD5	4	0.9271	0.92785	1	16957	1	0.63257	0.04469	0.052046	0.954574	1043	1	0.63257
HPCAL1	4	0.32891	0.54523	1	10109	1	0.73885	0.044765	0.052103	0.954574	1044	1	0.73885
DOLK	4	0.27566	0.48679	1	9173	3	-1.3671	0.044815	0.052149	0.954574	1045	1	-1.3671
CLEC3A	4	0.63606	0.77317	1	14020	2	0.74631	0.044865	0.052194	0.954574	1046	1	0.74631
CYGB	4	0.86166	0.88247	1	16058	1	1.6899	0.044916	0.052245	0.954589	1047	1	1.6899
SURF6	4	0.40891	0.60272	1	11048	2	-0.13428	0.045116	0.052417	0.956641	1048	1	-0.13428
SMIM10L1	4	0.59709	0.74306	1	13519	2	0.18696	0.045166	0.052457	0.956641	1049	1	0.18696
RPS5	4	0.77525	0.84309	1	15288	1	1.1389	0.045266	0.05254	0.957248	1050	1	1.1389
FAM25G	4	0.54868	0.7061	1	12845	2	-0.010101	0.045416	0.052684	0.958036	1051	1	-0.010101
EIF6	4	0.093401	0.22599	0.932867	4625	3	-1.1654	0.045416	0.052684	0.958036	1052	1	-1.1654
NOL11	4	0.028092	0.086487	0.817406	2012	2	-0.079543	0.045516	0.052775	0.958773	1053	1	-0.079543
ADORA2A	4	0.18361	0.36186	0.990945	6973	2	0.2467	0.045616	0.052853	0.95879	1054	1	0.2467
PDCD2L	4	0.99586	0.99585	1	18666	0	1.5036	0.045666	0.052901	0.95879	1055	1	1.5036
VGLL2	4	0.07536	0.19656	0.910028	4112	3	-0.61984	0.045717	0.05294	0.95879	1056	1	-0.61984
CDK2AP1	4	0.10141	0.23853	0.944258	4824	3	-0.63813	0.045767	0.052982	0.95879	1057	1	-0.63813
ABCC9	4	0.11797	0.26437	0.951252	5302	2	-0.26154	0.045817	0.053026	0.95879	1058	1	-0.26154
LOC388282	4	0.9901	0.99008	1	18458	0	1.2526	0.046017	0.053208	0.961168	1059	1	1.2526
YIPF2	4	0.56326	0.71717	1	13057	2	0.058898	0.046167	0.053332	0.962486	1060	1	0.058898
TMUB1	4	0.94898	0.94902	1	17378	0	0.27807	0.046317	0.053464	0.962681	1061	1	0.27807
ANOS1	4	0.40282	0.59836	1	10987	2	-0.33184	0.046367	0.053501	0.962681	1062	1	-0.33184
RTL1	4	0.90781	0.912	1	16661	1	1.2025	0.046417	0.053535	0.962681	1063	1	1.2025
CFAP74	4	0.43539	0.62193	1	11371	2	-0.02781	0.046467	0.053579	0.962681	1064	1	-0.02781
LILRA2	4	0.73934	0.83004	1	15049	1	0.81515	0.046517	0.053618	0.962681	1065	1	0.81515
MUS81	4	0.99414	0.99418	1	18596	0	1.2999	0.046567	0.053671	0.962681	1066	1	1.2999
CDH15	4	0.43753	0.62347	1	11406	2	0.24797	0.046617	0.053717	0.962681	1067	1	0.24797
PASK	4	0.99198	0.992	1	18520	0	0.99491	0.046667	0.053752	0.962681	1068	1	0.99491
TRMT61B	4	0.72367	0.82486	1	14934	1	1.0904	0.046717	0.053796	0.962681	1069	1	1.0904
KRT14	4	0.99447	0.99449	1	18606	0	1.8563	0.046917	0.053974	0.963889	1070	1	1.8563
SYT9	4	0.67677	0.80512	1	14574	1	0.10272	0.046967	0.054014	0.963889	1071	1	0.10272
TMEM56	4	0.21067	0.40004	0.998651	7620	3	-0.35907	0.047017	0.054064	0.963889	1072	1	-0.35907
ZNF441	4	0.57466	0.72578	1	13203	1	0.17171	0.047067	0.054103	0.963889	1073	1	0.17171
TSSK6	4	2.3987e-05	9.7135e-05	0.080541	22	2	-1.2575	0.047117	0.05415	0.963889	1074	1	-1.2575
USP37	4	0.69533	0.81591	1	14754	1	0.56468	0.047167	0.054191	0.963889	1075	1	0.56468
OR5H14	4	0.89302	0.90149	1	16457	1	1.0069	0.047217	0.054233	0.963889	1076	1	1.0069
KAT8	4	0.93654	0.9366	1	17109	1	0.4283	0.047267	0.054281	0.963889	1077	1	0.4283
MYO16	4	0.42658	0.61561	1	11252	1	1.5192	0.047367	0.054361	0.963889	1078	1	1.5192
EMC7	4	0.0046619	0.016193	0.627769	489	3	-1.9666	0.047417	0.054409	0.963889	1079	1	-1.9666
OR2A25	4	0.94567	0.94569	1	17306	0	0.92157	0.047467	0.054453	0.963889	1080	1	0.92157
CUEDC2	4	0.60677	0.75058	1	13637	2	0.50243	0.047517	0.054505	0.963889	1081	1	0.50243
TEF	4	0.91453	0.9172	1	16765	1	0.65834	0.047617	0.054594	0.963889	1082	1	0.65834
SST	4	0.06885	0.18582	0.904347	3916	3	-0.71091	0.047667	0.054641	0.963889	1083	1	-0.71091
BCO2	4	0.94306	0.94316	1	17256	0	0.52501	0.047717	0.054689	0.963889	1084	1	0.52501
ZSCAN20	4	0.022106	0.069701	0.79398	1657	2	-0.2317	0.047767	0.054725	0.963889	1085	1	-0.2317
HELT	4	0.15951	0.32705	0.981264	6363	1	0.34707	0.047817	0.054776	0.963889	1086	1	0.34707
COA5	4	0.43768	0.62358	1	11407	2	0.019569	0.048042	0.054973	0.963889	1087	1	0.019569
DDX31	4	0.99475	0.99477	1	18620	0	1.2411	0.048042	0.054973	0.963889	1088	1	1.2411
RPAP2	4	1.5946e-05	6.1389e-05	0.061751	18	3	-3.8551	0.048042	0.054973	0.963889	1089	1	-3.8551
PPIL2	4	0.42782	0.61653	1	11273	1	0.95717	0.048042	0.054973	0.963889	1090	1	0.95717
WDR18	4	0.0099165	0.033173	0.731229	855	2	-0.67527	0.048042	0.054973	0.963889	1091	1	-0.67527
C22orf31	4	0.98242	0.98244	1	18231	0	1.4629	0.048216	0.05514	0.965668	1092	1	1.4629
RAB22A	4	0.78276	0.84609	1	15338	1	0.93382	0.048266	0.055175	0.965668	1093	1	0.93382
SASS6	4	0.013271	0.043554	0.750437	1102	3	-1.2723	0.048416	0.055307	0.966024	1094	1	-1.2723
DNAJB13	4	0.61459	0.7566	1	13746	2	0.29879	0.048466	0.055357	0.966024	1095	1	0.29879
C1orf226	4	0.18197	0.35952	0.990043	6932	3	-0.25966	0.048516	0.055393	0.966024	1096	1	-0.25966
BEGAIN	4	0.14692	0.30828	0.973331	6046	3	-0.31963	0.048566	0.055434	0.966024	1097	1	-0.31963
PFKFB3	4	0.89375	0.90199	1	16471	1	0.57069	0.048616	0.055478	0.966024	1098	1	0.57069
TIGAR	4	0.78349	0.84637	1	15344	1	1.1313	0.048716	0.055561	0.966024	1099	1	1.1313
PPP1R32	4	0.95661	0.95662	1	17571	0	2.0134	0.048766	0.055606	0.966024	1100	1	2.0134
KRTAP2_3	4	0.99977	0.99977	1	19003	0	2.3956	0.048816	0.055656	0.966024	1101	1	2.3956
CRYBB1	4	0.45562	0.63671	1	11634	2	0.26921	0.048866	0.055699	0.966024	1102	1	0.26921
TDRD3	4	0.64511	0.78028	1	14146	2	0.14262	0.048916	0.055737	0.966024	1103	1	0.14262
ALDOA	4	0.27861	0.49065	1	9240	3	-0.98251	0.04899	0.055802	0.966024	1104	1	-0.98251
ATP5G1	4	0.9539	0.95393	1	17501	0	1.3088	0.04899	0.055802	0.966024	1105	1	1.3088
GRAMD1C	4	0.22008	0.41289	0.999445	7881	3	-0.43697	0.049065	0.055872	0.966359	1106	1	-0.43697
VDR	4	0.82742	0.86515	1	15712	1	0.32076	0.049115	0.055925	0.966407	1107	1	0.32076
THRAP3	4	0.90509	0.90998	1	16624	1	0.38318	0.049215	0.056021	0.966891	1108	1	0.38318
SFRP2	4	0.85395	0.87826	1	15975	1	1.4053	0.049265	0.056069	0.966891	1109	1	1.4053
ZNF561	4	0.0016008	0.0057128	0.51348	211	2	-0.45259	0.049315	0.056121	0.966891	1110	1	-0.45259
GPATCH8	4	0.4747	0.65082	1	11869	1	0.96693	0.049365	0.056167	0.966891	1111	1	0.96693
TMEM184B	4	0.85408	0.87832	1	15977	1	0.49575	0.049415	0.056216	0.966891	1112	1	0.49575
DHX38	4	0.4049	0.59981	1	11004	2	0.067507	0.049465	0.056257	0.966891	1113	1	0.067507
CT45A9	4	0.28588	0.49998	1	9407	2	0.27059	0.049564	0.056348	0.967588	1114	1	0.27059
LACTB	4	0.99696	0.99698	1	18725	0	1.5114	0.049664	0.05644	0.968302	1115	1	1.5114
CDK16	4	0.88245	0.89466	1	16303	1	1.2878	0.049764	0.056535	0.968765	1116	1	1.2878
ZNF777	4	0.19067	0.37191	0.993484	7138	3	-0.24408	0.049814	0.056587	0.968765	1117	1	-0.24408
BDH1	4	0.087663	0.21673	0.926619	4464	3	-0.70577	0.049864	0.056628	0.968765	1118	1	-0.70577
BOLA3	4	0.65358	0.78682	1	14250	2	0.090898	0.049914	0.056679	0.968765	1119	1	0.090898
GRAMD4	4	0.42926	0.61757	1	11295	2	0.18538	0.050088	0.056822	0.968765	1120	1	0.18538
CYCS	4	0.65699	0.78952	1	14299	2	0.13464	0.050088	0.056822	0.968765	1121	1	0.13464
SMU1	4	0.3114	0.53216	1	9903	3	-0.22119	0.050088	0.056822	0.968765	1122	1	-0.22119
MAGEB3	4	0.17019	0.34266	0.988439	6617	1	0.84711	0.050213	0.056928	0.9692	1123	1	0.84711
UPK2	4	0.14761	0.30932	0.973779	6060	2	0.63302	0.050263	0.056981	0.9692	1124	1	0.63302
DEFB106A	4	0.49932	0.66921	1	12198	1	1.0955	0.050313	0.057035	0.9692	1125	1	1.0955
CLEC4E	4	0.56301	0.71698	1	13051	2	0.084421	0.050362	0.057081	0.9692	1126	1	0.084421
H6PD	4	0.93013	0.93055	1	17002	1	0.2841	0.050462	0.057175	0.9692	1127	1	0.2841
RSPH14	4	0.27989	0.49232	1	9275	3	-0.088877	0.050512	0.057218	0.9692	1128	1	-0.088877
EPB41L4B	4	0.26828	0.47724	1	8999	3	-0.18707	0.050562	0.057265	0.9692	1129	1	-0.18707
GSG2	4	0.44926	0.63198	1	11543	2	0.071778	0.050612	0.057309	0.9692	1130	1	0.071778
SSB	4	0.14238	0.30153	0.970989	5925	3	-0.72742	0.050662	0.057364	0.9692	1131	1	-0.72742
PLA2G2D	4	0.42762	0.61641	1	11268	2	0.058564	0.050711	0.057409	0.9692	1132	1	0.058564
C12orf40	4	0.069636	0.1871	0.904605	3939	2	-0.081836	0.050861	0.057554	0.9692	1133	1	-0.081836
FAM69C	4	0.057514	0.16302	0.892209	3484	2	0.13398	0.050961	0.057627	0.9692	1134	1	0.13398
PLTP	4	0.39683	0.59399	1	10922	2	0.10104	0.051011	0.057672	0.9692	1135	1	0.10104
KRTAP5_10	4	0.95208	0.95214	1	17456	0	0.85838	0.05106	0.057714	0.9692	1136	1	0.85838
UQCC3	4	0.6984	0.81683	1	14775	1	0.59114	0.05111	0.057769	0.9692	1137	1	0.59114
NACA2	4	0.9894	0.98939	1	18425	0	1.0118	0.05116	0.057808	0.9692	1138	1	1.0118
LAT2	4	0.62573	0.76523	1	13891	2	-0.09011	0.05126	0.057899	0.9692	1139	1	-0.09011
TAS2R40	4	0.96839	0.96846	1	17869	0	0.61559	0.05131	0.057945	0.9692	1140	1	0.61559
ATP9B	4	0.51636	0.68187	1	12422	2	-0.13797	0.051359	0.057989	0.9692	1141	1	-0.13797
NAA10	4	0.01323	0.043423	0.750437	1096	3	-0.17801	0.052256	0.058825	0.9692	1142	1	-0.17801
UHRF1	4	0.043237	0.12717	0.861262	2808	2	0.35256	0.052256	0.058825	0.9692	1143	1	0.35256
C1orf109	4	0.669	0.79894	1	14463	2	0.035298	0.052256	0.058825	0.9692	1144	1	0.035298
RPS18	4	0.81605	0.85998	1	15612	1	0.3551	0.052256	0.058825	0.9692	1145	1	0.3551
ISG20L2	4	0.029068	0.089182	0.81866	2074	2	0.03862	0.052256	0.058825	0.9692	1146	1	0.03862
NHP2	4	0.47999	0.65478	1	11927	2	0.17496	0.052256	0.058825	0.9692	1147	1	0.17496
SUPT4H1	4	0.68841	0.81384	1	14714	1	0.68495	0.052256	0.058825	0.9692	1148	1	0.68495
PNO1	4	0.66325	0.79437	1	14377	2	0.65892	0.052256	0.058825	0.9692	1149	1	0.65892
UQCRFS1	4	0.59197	0.73916	1	13450	1	0.82184	0.052256	0.058825	0.9692	1150	1	0.82184
GTF2H2C	4	0.90179	0.90759	1	16578	1	1.3304	0.052256	0.058825	0.9692	1151	1	1.3304
EIF1AD	4	0.084474	0.21154	0.921409	4366	2	-0.18688	0.052256	0.058825	0.9692	1152	1	-0.18688
CSTF1	4	0.080222	0.2046	0.917402	4250	2	-0.060315	0.052256	0.058825	0.9692	1153	1	-0.060315
WDR3	4	0.66827	0.79835	1	14454	2	0.42116	0.052256	0.058825	0.9692	1154	1	0.42116
PCDHB4	4	0.36805	0.57322	1	10574	2	0.038172	0.052256	0.058825	0.9692	1155	1	0.038172
LSM5	4	0.0022868	0.0081818	0.57047	271	3	-2.0637	0.052256	0.058825	0.9692	1156	1	-2.0637
AIRE	4	0.7877	0.84806	1	15374	1	0.88867	0.052256	0.058825	0.9692	1157	1	0.88867
DIEXF	4	0.2962	0.51307	1	9599	1	1.4131	0.052256	0.058825	0.9692	1158	1	1.4131
RBM22	4	0.36683	0.57236	1	10560	2	-0.38639	0.052256	0.058825	0.9692	1159	1	-0.38639
C14orf80	4	0.31061	0.53116	1	9886	3	-0.38954	0.052256	0.058825	0.9692	1160	1	-0.38954
CRYGD	4	0.53556	0.69615	1	12669	2	0.022737	0.053251	0.059714	0.981255	1161	1	0.022737
PRG3	4	0.9952	0.9952	1	18641	0	1.2871	0.053301	0.059757	0.981255	1162	1	1.2871
C16orf78	4	0.90123	0.90719	1	16567	1	0.4341	0.053351	0.059809	0.981255	1163	1	0.4341
ACSM5	4	0.27448	0.4853	1	9144	2	0.22559	0.053401	0.059865	0.981255	1164	1	0.22559
GPATCH1	4	0.29321	0.50927	1	9541	3	-0.1211	0.0535	0.059943	0.981565	1165	1	-0.1211
GABRA2	4	0.38316	0.58399	1	10740	2	0.35873	0.05355	0.059992	0.981565	1166	1	0.35873
NELFB	4	0.41556	0.60755	1	11135	2	-0.37219	0.053599	0.060042	0.981565	1167	1	-0.37219
SAAL1	4	0.14812	0.31008	0.973779	6080	2	-0.15532	0.053649	0.06009	0.981565	1168	1	-0.15532
PPFIA3	4	0.59238	0.73948	1	13454	2	0.22877	0.053749	0.06018	0.981865	1169	1	0.22877
KRT3	4	0.48673	0.65976	1	12019	2	0.41978	0.053848	0.060268	0.981865	1170	1	0.41978
KLK14	4	0.46944	0.64688	1	11812	1	0.38483	0.053898	0.060322	0.981865	1171	1	0.38483
NINL	4	0.55398	0.71008	1	12923	2	0.21387	0.053948	0.06036	0.981865	1172	1	0.21387
DNAJB7	4	0.99687	0.9969	1	18720	0	1.0849	0.053997	0.060408	0.981865	1173	1	1.0849
FXYD3	4	0.80837	0.85661	1	15552	1	0.95536	0.054047	0.060445	0.981865	1174	1	0.95536
NIPBL	4	0.47738	0.65283	1	11902	2	-0.15287	0.054097	0.060488	0.981865	1175	1	-0.15287
FBXO31	4	0.0028451	0.010082	0.594302	318	2	-1.0567	0.054146	0.060526	0.981865	1176	1	-1.0567
MYL3	4	0.40891	0.60272	1	11047	2	-0.21431	0.054196	0.06057	0.981865	1177	1	-0.21431
EIF5A	4	0.93755	0.93764	1	17121	0	1.097	0.054271	0.060641	0.982174	1178	1	1.097
B4GALT5	4	0.97006	0.97013	1	17898	0	1.3279	0.054395	0.060753	0.982725	1179	1	1.3279
LOC100130880	4	0.12344	0.27278	0.95733	5440	3	-0.4025	0.054445	0.060795	0.982725	1180	1	-0.4025
DRD1	4	0.17832	0.35432	0.988906	6839	2	-0.28778	0.054494	0.060849	0.982725	1181	1	-0.28778
GSAP	4	0.52823	0.69082	1	12572	2	0.12159	0.054544	0.060894	0.982725	1182	1	0.12159
TTLL11	4	0.063263	0.17639	0.897315	3749	3	-0.60121	0.054594	0.060932	0.982725	1183	1	-0.60121
PAX9	4	0.013928	0.045588	0.756545	1149	3	-0.95344	0.054693	0.061022	0.98328	1184	1	-0.95344
SERF1A	4	0.97589	0.97608	1	18052	0	0.44952	0.054793	0.061108	0.98328	1185	1	0.44952
CLCF1	4	0.96002	0.96005	1	17647	0	1.3617	0.054892	0.0612	0.98328	1186	1	1.3617
ZBTB39	4	0.13705	0.29349	0.968948	5775	3	-0.68205	0.054942	0.061235	0.98328	1187	1	-0.68205
OR4A15	4	0.94416	0.94425	1	17279	0	0.70626	0.054991	0.061279	0.98328	1188	1	0.70626
SENP6	3	0.029789	0.074853	0.797894	2104	2	-1.1018	0.055	0.057494	0.9692	1189	1	-1.1018
RGPD1	4	0.64088	0.77693	1	14083	1	0.64043	0.055041	0.061322	0.98328	1190	1	0.64043
STAU1	4	0.63043	0.76889	1	13956	1	0.19435	0.055091	0.061368	0.98328	1191	1	0.19435
APITD1_CORT	4	0.39387	0.59182	1	10888	2	0.38956	0.05519	0.061461	0.98328	1192	1	0.38956
NSUN3	4	0.093314	0.22586	0.932861	4620	3	-0.82398	0.05524	0.061506	0.98328	1193	1	-0.82398
NPTX1	4	0.67167	0.80108	1	14498	2	0.077005	0.055289	0.061555	0.98328	1194	1	0.077005
ALDH8A1	4	0.98383	0.98382	1	18269	0	1.4681	0.055339	0.06159	0.98328	1195	1	1.4681
IL17C	4	0.42657	0.6156	1	11251	2	-0.067899	0.055389	0.061635	0.98328	1196	1	-0.067899
MSL3	4	0.98958	0.98955	1	18433	0	2.0119	0.055438	0.061672	0.98328	1197	1	2.0119
SMAD5	4	0.40085	0.5969	1	10967	2	0.58033	0.055513	0.061738	0.98328	1198	1	0.58033
KRTCAP2	4	0.36849	0.57355	1	10580	1	0.14048	0.055513	0.061738	0.98328	1199	1	0.14048
DIO3	4	0.38696	0.58676	1	10788	2	0.11752	0.055687	0.061887	0.984835	1200	1	0.11752
FAM81A	4	0.28917	0.50418	1	9455	3	-0.31181	0.055836	0.062029	0.985795	1201	1	-0.31181
EXOC3	4	0.29318	0.50923	1	9540	2	0.042094	0.055885	0.062072	0.985795	1202	1	0.042094
CCL19	4	0.4995	0.66937	1	12202	1	0.72088	0.055935	0.062118	0.985795	1203	1	0.72088
ALDOC	4	0.99982	0.99982	1	19011	0	2.626	0.055985	0.062165	0.985795	1204	1	2.626
FAIM	4	0.042108	0.12421	0.857063	2763	2	0.33261	0.056084	0.062259	0.985795	1205	1	0.33261
OCLN	4	0.10514	0.24435	0.944851	4936	2	-0.17636	0.056134	0.062301	0.985795	1206	1	-0.17636
OR4C6	4	0.99994	0.99993	1	19047	0	2.5793	0.056183	0.062349	0.985795	1207	1	2.5793
MUC4	4	0.13017	0.28306	0.963302	5606	3	-0.41943	0.056233	0.062402	0.985795	1208	1	-0.41943
LY6G5C	4	0.0010886	0.0039452	0.469313	160	3	-1.9514	0.056282	0.062451	0.985795	1209	1	-1.9514
CRIM1	4	0.037306	0.11157	0.844097	2511	2	-0.30058	0.056332	0.062495	0.985795	1210	1	-0.30058
L3HYPDH	4	0.64916	0.78344	1	14181	1	0.13337	0.056382	0.06254	0.985795	1211	1	0.13337
GTF2I	4	0.10023	0.23665	0.941753	4798	3	-0.87554	0.056481	0.062624	0.985795	1212	1	-0.87554
PKD1L2	4	0.14268	0.30198	0.97104	5937	2	0.49168	0.056531	0.062661	0.985795	1213	1	0.49168
RIF1	4	0.090934	0.222	0.929541	4555	1	0.52945	0.05663	0.06275	0.985795	1214	1	0.52945
OR6A2	4	0.98873	0.98873	1	18406	0	1.5189	0.056679	0.062803	0.985795	1215	1	1.5189
RIBC1	4	0.50089	0.67042	1	12221	1	0.79144	0.056729	0.062852	0.985795	1216	1	0.79144
ZNF836	4	0.40612	0.6007	1	11018	1	1.4602	0.056779	0.062895	0.985795	1217	1	1.4602
RPAIN	4	0.23162	0.42856	1	8148	2	0.15214	0.056878	0.062987	0.985795	1218	1	0.15214
KRTAP4_9	4	0.978	0.97817	1	18120	0	1.6777	0.056927	0.063023	0.985795	1219	1	1.6777
GNB5	4	0.043277	0.12728	0.861377	2817	3	-1.3371	0.057002	0.063084	0.985795	1220	1	-1.3371
ARID4A	4	0.60013	0.74543	1	13558	2	0.61697	0.057076	0.063149	0.985795	1221	1	0.61697
KCTD7	4	0.55104	0.70788	1	12876	2	0.48881	0.057126	0.063196	0.985795	1222	1	0.48881
OSGEPL1	4	0.74255	0.83117	1	15072	1	0.50661	0.057175	0.063237	0.985795	1223	1	0.50661
C2orf91	4	0.087571	0.21658	0.926619	4460	2	0.16443	0.057225	0.063283	0.985795	1224	1	0.16443
OR5B3	4	0.99968	0.99968	1	18989	0	1.9888	0.057275	0.063333	0.985795	1225	1	1.9888
SPATC1	4	0.97532	0.9755	1	18041	0	0.60722	0.057324	0.063378	0.985795	1226	1	0.60722
RFX8	4	0.99056	0.99055	1	18475	0	0.93617	0.057374	0.063417	0.985795	1227	1	0.93617
GRAP	4	0.99285	0.99288	1	18551	0	1.5071	0.057423	0.063462	0.985795	1228	1	1.5071
MARS	3	0.013699	0.036067	0.731229	1131	1	0.26846	0.057506	0.059832	0.981255	1229	1	0.26846
NBPF15	3	0.025938	0.065853	0.792132	1896	2	-1.5411	0.057506	0.059832	0.981255	1230	1	-1.5411
CDC23	4	0.30963	0.52991	1	9866	3	-0.87395	0.057523	0.063546	0.985795	1231	1	-0.87395
MTUS2	4	0.88998	0.89951	1	16407	1	1.3451	0.057523	0.063546	0.985795	1232	1	1.3451
LGALS7B	4	0.95517	0.95519	1	17541	0	0.57803	0.057622	0.063635	0.98626	1233	1	0.57803
ATP2B2	4	0.15935	0.32684	0.980937	6361	3	-0.64839	0.057671	0.06368	0.98626	1234	1	-0.64839
UBA2	4	0.016023	0.052083	0.765762	1292	3	-1.393	0.05787	0.063855	0.988148	1235	1	-1.393
APOL6	4	0.4336	0.62068	1	11353	2	0.00095621	0.057919	0.063905	0.988148	1236	1	0.00095621
OR5AS1	4	0.99998	0.99998	1	19072	0	2.5795	0.058068	0.064051	0.988979	1237	1	2.5795
ORMDL3	4	0.93893	0.93899	1	17153	0	1.6399	0.058117	0.064095	0.988979	1238	1	1.6399
ANKS1B	4	0.94797	0.94802	1	17358	0	0.29768	0.058167	0.06414	0.988979	1239	1	0.29768
BCDIN3D	4	0.084474	0.21154	0.921409	4373	2	0.30849	0.058217	0.064182	0.988979	1240	1	0.30849
CHERP	4	0.73097	0.82721	1	14988	1	0.90927	0.058266	0.064229	0.988979	1241	1	0.90927
INIP	4	0.18781	0.36784	0.993484	7066	1	0.81485	0.058316	0.064269	0.988979	1242	1	0.81485
TMEM248	4	0.60785	0.75139	1	13650	1	0.19411	0.058415	0.064359	0.989561	1243	1	0.19411
KRTAP4_12	4	0.77279	0.84216	1	15270	1	1.2628	0.058514	0.06445	0.989588	1244	1	1.2628
PBX2	4	0.9546	0.95462	1	17520	0	0.44564	0.058563	0.064491	0.989588	1245	1	0.44564
HPCAL4	4	0.75119	0.83424	1	15124	1	0.49848	0.058613	0.064535	0.989588	1246	1	0.49848
CGB7	4	0.97724	0.97744	1	18091	0	1.1199	0.058662	0.064582	0.989588	1247	1	1.1199
RNF133	4	0.30206	0.52039	1	9701	1	0.93028	0.058712	0.06463	0.989588	1248	1	0.93028
APEX2	4	0.98482	0.98482	1	18300	0	1.0189	0.058762	0.064671	0.989588	1249	1	1.0189
RIC8A	4	0.1318	0.28554	0.966026	5641	2	0.29852	0.05891	0.064804	0.99034	1250	1	0.29852
FAM187B	4	0.39343	0.5915	1	10884	2	0.45749	0.05896	0.064847	0.99034	1251	1	0.45749
DENND4A	4	0.93948	0.93959	1	17165	0	0.89445	0.059009	0.064884	0.99034	1252	1	0.89445
NHLRC2	4	0.48882	0.6613	1	12055	2	-0.29448	0.059059	0.064928	0.99034	1253	1	-0.29448
AGAP3	4	0.98726	0.98721	1	18364	0	0.74284	0.059108	0.064989	0.99049	1254	1	0.74284
MRPL54	4	0.040373	0.11966	0.853334	2677	3	-1.0057	0.059405	0.065243	0.991184	1255	1	-1.0057
PGA4	4	0.9892	0.98918	1	18419	0	1.6347	0.059455	0.065289	0.991184	1256	1	1.6347
MRPL10	4	0.9903	0.99029	1	18465	0	0.70087	0.059504	0.065326	0.991184	1257	1	0.70087
OR8J3	4	0.99966	0.99966	1	18980	0	1.6686	0.059554	0.065371	0.991184	1258	1	1.6686
MOV10L1	4	0.37652	0.57928	1	10668	1	0.15354	0.059603	0.065414	0.991184	1259	1	0.15354
INS_IGF2	4	0.15122	0.31467	0.976218	6155	3	-0.32251	0.059653	0.065454	0.991184	1260	1	-0.32251
PON1	4	0.099028	0.23482	0.939257	4774	3	-0.17328	0.059702	0.065491	0.991184	1261	1	-0.17328
SMIM22	4	0.03361	0.1017	0.835869	2319	3	-1.0627	0.059752	0.065537	0.991184	1262	1	-1.0627
CDH24	4	0.25761	0.46332	1	8754	2	0.56598	0.059801	0.065572	0.991184	1263	1	0.56598
JMJD7	4	0.082751	0.20873	0.920658	4323	3	-0.64963	0.059851	0.065618	0.991184	1264	1	-0.64963
ZSCAN23	4	0.048307	0.14005	0.868092	3064	2	-0.62932	0.0599	0.065664	0.991184	1265	1	-0.62932
CWC15	4	0.45959	0.63965	1	11690	1	0.41841	0.05995	0.065704	0.991184	1266	1	0.41841
CPEB2	4	0.62601	0.76546	1	13897	1	0.65741	0.060024	0.065773	0.991184	1267	1	0.65741
ATP6V1B2	4	0.30963	0.52991	1	9862	3	-1.4033	0.060024	0.065773	0.991184	1268	1	-1.4033
TMEM45B	4	0.93135	0.93172	1	17025	1	1.4422	0.060098	0.065842	0.991184	1269	1	1.4422
RPL36A_HNRNPH2	4	0.97152	0.97165	1	17940	0	1.705	0.060148	0.065885	0.991184	1270	1	1.705
CUL3	4	0.012922	0.042504	0.747661	1083	1	0.18283	0.060197	0.065933	0.991184	1271	1	0.18283
C6orf48	4	0.55658	0.71209	1	12957	1	1.1881	0.060247	0.065977	0.991184	1272	1	1.1881
SLC25A26	4	0.11987	0.26733	0.951252	5364	1	0.84016	0.060296	0.06602	0.991184	1273	1	0.84016
TAMM41	4	0.009941	0.033247	0.731229	859	3	-0.23825	0.06042	0.066137	0.992162	1274	1	-0.23825
MT2A	4	0.053475	0.15309	0.882073	3314	1	1.0946	0.060543	0.066236	0.992741	1275	1	1.0946
ZFP69B	4	0.76051	0.83758	1	15186	1	0.6932	0.060593	0.06628	0.992741	1276	1	0.6932
PDPK1	4	0.65827	0.79048	1	14321	2	0.71573	0.060692	0.066372	0.993344	1277	1	0.71573
ACADM	4	0.28371	0.49724	1	9356	2	-0.010973	0.06089	0.066553	0.99491	1278	1	-0.010973
TPST1	4	0.23041	0.42691	1	8123	3	-0.28816	0.060939	0.066603	0.99491	1279	1	-0.28816
FPR3	4	0.14308	0.30259	0.97104	5947	3	-0.29715	0.061038	0.066685	0.99491	1280	1	-0.29715
SMKR1	4	0.46067	0.64047	1	11704	1	0.76284	0.061087	0.06674	0.994953	1281	1	0.76284
TBC1D28	4	0.79403	0.8506	1	15425	1	1.2101	0.061236	0.066855	0.995503	1282	1	1.2101
SCAMP5	4	0.67405	0.80295	1	14526	1	0.82185	0.061285	0.066901	0.995503	1283	1	0.82185
FAM173B	4	0.91469	0.91733	1	16768	1	1.0477	0.061335	0.066954	0.995503	1284	1	1.0477
ZNF227	4	0.36091	0.56807	1	10485	2	0.72355	0.061384	0.067	0.995503	1285	1	0.72355
ELMOD1	4	0.53976	0.69935	1	12723	1	0.62725	0.061433	0.067037	0.995503	1286	1	0.62725
OR9Q2	4	0.99985	0.99985	1	19016	0	2.0921	0.061532	0.067136	0.995824	1287	1	2.0921
HNRNPC	4	0.67987	0.80753	1	14614	2	0.75763	0.061631	0.067228	0.995824	1288	1	0.75763
HAUS6	4	0.064001	0.17767	0.899104	3765	3	-0.045292	0.061681	0.06727	0.995824	1289	1	-0.045292
MOB4	4	0.048532	0.14061	0.868841	3088	2	0.072177	0.06173	0.067314	0.995824	1290	1	0.072177
C3orf84	4	0.24866	0.45147	1	8545	3	-0.40241	0.061779	0.067349	0.995824	1291	1	-0.40241
CELF6	4	0.17606	0.35111	0.988906	6777	1	0.49677	0.061829	0.067396	0.995824	1292	1	0.49677
SLC11A1	4	0.25891	0.46507	1	8776	3	-0.23942	0.061878	0.067444	0.995824	1293	1	-0.23942
MEGF6	4	0.75374	0.83516	1	15143	1	1.876	0.061928	0.067491	0.995824	1294	1	1.876
SMYD2	4	0.49536	0.66624	1	12148	2	-0.076142	0.061977	0.067544	0.995824	1295	1	-0.076142
DSCR4	4	0.54341	0.70214	1	12773	2	0.33005	0.062026	0.067586	0.995824	1296	1	0.33005
NEUROG2	4	0.92764	0.92834	1	16962	1	0.31481	0.062076	0.067632	0.995824	1297	1	0.31481
TMX3	4	0.48848	0.66103	1	12047	1	0.45833	0.062175	0.067728	0.996354	1298	1	0.45833
TRIM49	4	0.09021	0.22084	0.928014	4541	1	1.1756	0.062224	0.067778	0.996354	1299	1	1.1756
C1QBP	4	0.98039	0.98045	1	18181	0	0.51474	0.062273	0.067828	0.996354	1300	1	0.51474
SKP1	4	0.30019	0.51812	1	9667	2	-0.40766	0.062323	0.067876	0.996354	1301	1	-0.40766
KRTAP2_4	4	0.99979	0.99979	1	19007	0	2.1234	0.062471	0.068012	0.997009	1302	1	2.1234
MPPED1	4	0.58958	0.73732	1	13420	2	0.66516	0.06257	0.068086	0.997009	1303	1	0.66516
SNRPF	2	0.6897	0.6927	1	14728	1	0.3515	0.062578	0.06267	0.985795	1304	1	0.3515
DTL	4	0.32575	0.54293	1	10077	2	-0.15478	0.062619	0.068128	0.997009	1305	1	-0.15478
MAST3	4	0.97151	0.97163	1	17939	0	1.2344	0.062669	0.068178	0.997009	1306	1	1.2344
AGMAT	4	0.10318	0.24126	0.944851	4872	2	0.60634	0.062792	0.068286	0.997009	1307	1	0.60634
SSBP1	4	0.40115	0.59713	1	10977	1	0.81481	0.062792	0.068286	0.997009	1308	1	0.81481
IKBKAP	4	0.022357	0.070415	0.79398	1680	3	-1.2585	0.062792	0.068286	0.997009	1309	1	-1.2585
VTA1	4	0.58341	0.73257	1	13322	2	-0.20001	0.062965	0.068453	0.998479	1310	1	-0.20001
HPS5	4	0.82335	0.86328	1	15669	1	0.4794	0.063014	0.068498	0.998479	1311	1	0.4794
XRCC2	4	0.67739	0.8056	1	14583	1	0.98058	0.063064	0.068544	0.998479	1312	1	0.98058
PCBP4	4	0.68881	0.81397	1	14721	1	0.73662	0.063162	0.068625	0.99891	1313	1	0.73662
TOR1A	4	0.183	0.361	0.990152	6961	2	-0.069506	0.063261	0.068717	0.999476	1314	1	-0.069506
GP2	4	0.6666	0.79704	1	14426	2	0.12924	0.06336	0.068808	0.999906	1315	1	0.12924
LRFN5	4	0.1624	0.33128	0.9833	6433	3	-0.6379	0.063409	0.068851	0.999906	1316	1	-0.6379
CCL20	4	0.98676	0.9867	1	18353	0	0.69531	0.063557	0.068995	1	1317	1	0.69531
KCNC4	4	0.49403	0.66523	1	12129	2	0.12599	0.063606	0.069045	1	1318	1	0.12599
SLC23A3	4	0.43595	0.62233	1	11379	2	0.50027	0.063656	0.069097	1	1319	1	0.50027
THRSP	4	0.71315	0.82142	1	14873	1	1.7601	0.063705	0.069144	1	1320	1	1.7601
L1TD1	4	0.078931	0.20249	0.914476	4223	3	-0.55242	0.063754	0.069181	1	1321	1	-0.55242
MRPL11	4	0.12767	0.27924	0.961985	5540	2	0.014306	0.063828	0.069239	1	1322	1	0.014306
C11orf57	4	0.73761	0.82943	1	15037	1	0.61503	0.063828	0.069239	1	1323	1	0.61503
SNX15	4	0.68084	0.80831	1	14626	2	0.22715	0.063902	0.069303	1	1324	1	0.22715
FCRL4	4	0.96004	0.96007	1	17648	0	1.0666	0.063952	0.069346	1	1325	1	1.0666
MRPL18	4	0.27037	0.47997	1	9053	2	-0.51801	0.064001	0.069389	1	1326	1	-0.51801
EQTN	4	0.9764	0.9766	1	18068	0	0.73212	0.06405	0.069439	1	1327	1	0.73212
CCDC116	4	0.62251	0.76272	1	13844	2	0.53996	0.0641	0.069503	1	1328	1	0.53996
NKX2_1	4	0.85845	0.88067	1	16028	1	0.44593	0.064149	0.069546	1	1329	1	0.44593
TRIM49C	4	0.99929	0.99931	1	18926	0	1.6752	0.064248	0.069643	1	1330	1	1.6752
SMAD7	4	0.65624	0.78894	1	14289	2	0.2244	0.064297	0.069684	1	1331	1	0.2244
OR6F1	4	0.96019	0.96022	1	17651	0	0.38319	0.064346	0.069725	1	1332	1	0.38319
PSME2	4	0.84792	0.87513	1	15901	1	0.29034	0.064396	0.069768	1	1333	1	0.29034
HNRNPCL2	4	0.59405	0.74072	1	13474	2	0.32403	0.064445	0.069813	1	1334	1	0.32403
RASA4	4	0.025895	0.080334	0.80723	1894	2	0.86654	0.064642	0.069999	1	1335	1	0.86654
ILDR1	4	0.32338	0.54119	1	10059	2	-0.23037	0.064741	0.070087	1	1336	1	-0.23037
EIF1B	4	0.37465	0.57796	1	10650	2	-0.080177	0.064839	0.070172	1	1337	1	-0.080177
SLC7A5	4	0.3005	0.51849	1	9674	3	-0.14759	0.065037	0.070344	1	1338	1	-0.14759
EMC3	4	0.29173	0.50742	1	9510	2	-0.61878	0.065086	0.070393	1	1339	1	-0.61878
OR56A3	4	0.42925	0.61757	1	11292	2	-0.30761	0.065135	0.070445	1	1340	1	-0.30761
HIST1H2AG	4	0.16212	0.33087	0.982994	6427	3	-0.10785	0.065308	0.070596	1	1341	1	-0.10785
SPATA5	4	0.22142	0.41469	0.999468	7917	3	-0.54711	0.065308	0.070596	1	1342	1	-0.54711
SIM2	4	0.06493	0.1793	0.89937	3796	3	-0.48115	0.065381	0.070679	1	1343	1	-0.48115
GSTM3	4	0.17892	0.35518	0.988906	6858	2	0.25687	0.06548	0.070769	1	1344	1	0.25687
SCHIP1	4	0.5405	0.69992	1	12730	2	-0.17066	0.065529	0.070813	1	1345	1	-0.17066
STRA6	4	0.86549	0.88468	1	16104	1	0.50864	0.065579	0.070859	1	1346	1	0.50864
IFNGR2	4	0.27824	0.49018	1	9229	2	-0.18872	0.065628	0.070906	1	1347	1	-0.18872
GPBP1	4	0.96605	0.9661	1	17812	0	1.293	0.065677	0.070951	1	1348	1	1.293
EIF4EBP3	4	0.27566	0.48679	1	9175	3	-0.45055	0.065726	0.070995	1	1349	1	-0.45055
CYP27B1	4	0.3928	0.59104	1	10871	2	0.85358	0.065776	0.07104	1	1350	1	0.85358
SUPT5H	4	0.64875	0.7831	1	14179	2	0.14692	0.065874	0.071118	1	1351	1	0.14692
KLHL12	4	0.47645	0.65216	1	11892	2	0.50241	0.065923	0.071167	1	1352	1	0.50241
RLIM	4	0.94199	0.94208	1	17219	0	0.90388	0.065973	0.071208	1	1353	1	0.90388
MTA2	4	0.41393	0.60642	1	11112	2	0.080164	0.066219	0.071435	1	1354	1	0.080164
OR4F5	4	0.70508	0.81886	1	14817	1	0.53122	0.066268	0.071481	1	1355	1	0.53122
ZGPAT	4	0.23474	0.43283	1	8219	1	0.8501	0.066416	0.071615	1	1356	1	0.8501
VRK1	4	0.099477	0.23552	0.940804	4781	3	-0.9978	0.066514	0.071709	1	1357	1	-0.9978
ATP5A1	4	0.021262	0.067327	0.792868	1608	2	-0.16687	0.066637	0.071831	1	1358	1	-0.16687
BUD13	4	0.15314	0.31757	0.97704	6204	2	0.53349	0.066637	0.071831	1	1359	1	0.53349
CLTC	4	0.86333	0.88342	1	16078	1	0.64701	0.066637	0.071831	1	1360	1	0.64701
GXYLT1	4	0.24174	0.44214	1	8386	3	-0.11767	0.06676	0.071953	1	1361	1	-0.11767
SNAPC1	4	0.85544	0.87907	1	15992	1	0.81831	0.066883	0.072074	1	1362	1	0.81831
DHX33	4	0.84232	0.87228	1	15846	1	0.55705	0.066883	0.072074	1	1363	1	0.55705
ANKRA2	4	0.24729	0.44958	1	8515	3	-0.50713	0.066957	0.072144	1	1364	1	-0.50713
RNF185	4	0.2201	0.41291	0.999445	7884	2	0.04958	0.067006	0.072188	1	1365	1	0.04958
ARL4A	4	0.21895	0.41138	0.998651	7859	3	-0.56428	0.067056	0.072232	1	1366	1	-0.56428
RNH1	4	0.96359	0.96363	1	17733	0	1.5846	0.067154	0.072329	1	1367	1	1.5846
DKK2	4	0.16075	0.32887	0.982258	6389	3	-0.31633	0.067203	0.072377	1	1368	1	-0.31633
F7	4	0.88061	0.89355	1	16276	1	1.3713	0.067302	0.072467	1	1369	1	1.3713
HCFC2	4	0.45042	0.63281	1	11559	2	0.29448	0.0674	0.072557	1	1370	1	0.29448
HN1	4	0.85369	0.87812	1	15970	1	0.67826	0.067449	0.072597	1	1371	1	0.67826
MTM1	4	0.97537	0.97554	1	18042	0	0.85946	0.067498	0.072649	1	1372	1	0.85946
SEMA4C	4	0.84962	0.87599	1	15923	1	0.65502	0.067548	0.072691	1	1373	1	0.65502
BSCL2	4	0.89054	0.8999	1	16416	1	0.19221	0.067646	0.072784	1	1374	1	0.19221
TBC1D8B	4	0.88552	0.89663	1	16349	1	1.4322	0.067695	0.072826	1	1375	1	1.4322
XPR1	4	0.4831	0.65705	1	11971	2	0.59011	0.067744	0.072875	1	1376	1	0.59011
RASAL3	4	0.65035	0.78437	1	14197	2	0.94903	0.067793	0.072914	1	1377	1	0.94903
BAK1	4	0.99528	0.99528	1	18644	0	1.8572	0.067892	0.072991	1	1378	1	1.8572
ATP13A4	4	0.55715	0.71253	1	12966	2	-0.17742	0.067941	0.07304	1	1379	1	-0.17742
CNNM1	4	0.56164	0.71597	1	13034	1	1.2474	0.06799	0.073087	1	1380	1	1.2474
TMC5	4	0.96892	0.96897	1	17879	0	0.88229	0.068039	0.073134	1	1381	1	0.88229
APH1A	4	0.24526	0.44685	1	8464	2	0.14185	0.068162	0.073257	1	1382	1	0.14185
FOXA2	4	0.30548	0.52471	1	9779	3	-0.14713	0.068162	0.073257	1	1383	1	-0.14713
CRNKL1	4	0.29536	0.51199	1	9572	3	-0.35013	0.06831	0.07339	1	1384	1	-0.35013
NIP7	4	0.1112	0.2539	0.947427	5111	3	-1.1793	0.06831	0.07339	1	1385	1	-1.1793
MED4	4	0.053706	0.15368	0.882454	3322	3	-1.2789	0.068383	0.073452	1	1386	1	-1.2789
ZSWIM3	4	0.1544	0.31943	0.978129	6234	2	0.15335	0.068433	0.073491	1	1387	1	0.15335
TACSTD2	4	0.72075	0.82393	1	14911	1	0.96351	0.068482	0.073529	1	1388	1	0.96351
C17orf77	4	0.81799	0.86083	1	15627	1	0.30764	0.068629	0.073666	1	1389	1	0.30764
C2orf81	4	0.31725	0.53694	1	9976	1	0.89108	0.068777	0.073804	1	1390	1	0.89108
FAM127C	4	0.82819	0.86552	1	15721	1	0.80834	0.068875	0.073897	1	1391	1	0.80834
MYO1B	4	0.34233	0.55483	1	10253	2	-0.039507	0.068924	0.073936	1	1392	1	-0.039507
BCAR1	4	0.010805	0.035981	0.731229	937	3	-1.2131	0.068973	0.073977	1	1393	1	-1.2131
CCL16	4	0.77386	0.84256	1	15279	1	0.86987	0.069071	0.074063	1	1394	1	0.86987
STAMBPL1	4	0.10244	0.24011	0.944851	4851	3	-0.61066	0.069145	0.07413	1	1395	1	-0.61066
DEFB114	4	0.96283	0.96285	1	17713	0	0.48282	0.069268	0.074242	1	1396	1	0.48282
ILF2	4	0.5307	0.69261	1	12608	2	-0.098632	0.069317	0.074292	1	1397	1	-0.098632
RAET1G	4	0.62205	0.76235	1	13840	2	0.24206	0.069464	0.074417	1	1398	1	0.24206
NDUFA9	4	0.30869	0.52873	1	9849	3	-0.1957	0.069513	0.074463	1	1399	1	-0.1957
EIF5	4	0.14655	0.30772	0.972744	6038	2	-0.49543	0.069636	0.07457	1	1400	1	-0.49543
KLF13	4	0.10875	0.25003	0.946944	5040	1	0.9684	0.06971	0.074632	1	1401	1	0.9684
CRB2	4	0.5068	0.67477	1	12301	2	0.034627	0.069759	0.074678	1	1402	1	0.034627
PDE7A	4	0.28284	0.49613	1	9337	3	-0.19552	0.069808	0.074721	1	1403	1	-0.19552
DGKB	4	0.33895	0.55244	1	10215	2	-0.20376	0.069906	0.07482	1	1404	1	-0.20376
UBQLNL	4	0.75664	0.8362	1	15160	1	0.60394	0.069955	0.074863	1	1405	1	0.60394
COX6B1	4	0.2687	0.47777	1	9010	2	-0.32293	0.070004	0.074921	1	1406	1	-0.32293
ZNF782	4	0.56354	0.71738	1	13064	2	1.1026	0.070201	0.075096	1	1407	1	1.1026
RRM1	3	0.032606	0.081252	0.808159	2262	1	0.47466	0.070211	0.07163	1	1408	1	0.47466
FANCF	4	0.80712	0.8561	1	15540	1	1.7751	0.07025	0.075135	1	1409	1	1.7751
CYB5R2	4	0.8519	0.87713	1	15951	1	0.91965	0.070299	0.075176	1	1410	1	0.91965
GINS1	4	0.60406	0.7485	1	13611	2	-0.0072495	0.070348	0.07522	1	1411	1	-0.0072495
PROKR2	4	0.14967	0.31241	0.975254	6115	3	-0.50629	0.070397	0.075261	1	1412	1	-0.50629
PLEKHA2	4	0.47525	0.65124	1	11882	2	-0.08441	0.070446	0.075312	1	1413	1	-0.08441
PHAX	4	0.4619	0.64135	1	11723	1	-0.21799	0.070495	0.075352	1	1414	1	-0.21799
CCDC43	4	0.99855	0.99852	1	18843	0	1.2216	0.070544	0.075396	1	1415	1	1.2216
ARID3C	4	0.91105	0.91443	1	16710	1	0.23984	0.070691	0.07552	1	1416	1	0.23984
ERBB2	4	0.50852	0.67606	1	12326	1	1.7602	0.070741	0.075562	1	1417	1	1.7602
CKMT2	4	0.99011	0.99009	1	18459	0	1.3673	0.07079	0.075602	1	1418	1	1.3673
PELO	4	0.89004	0.89955	1	16408	1	1.2487	0.070888	0.075695	1	1419	1	1.2487
DGKH	4	0.88654	0.89727	1	16360	1	0.45021	0.070986	0.07578	1	1420	1	0.45021
ZMYND15	4	0.85699	0.8799	1	16010	1	0.63371	0.071035	0.075822	1	1421	1	0.63371
CTTNBP2	4	0.8606	0.88186	1	16049	1	0.19097	0.071231	0.076002	1	1422	1	0.19097
RAB34	4	0.99946	0.99947	1	18948	0	2.0511	0.07128	0.076046	1	1423	1	2.0511
ZNF507	4	0.42607	0.61523	1	11245	2	0.17754	0.071378	0.076145	1	1424	1	0.17754
GSTA5	4	0.10361	0.24195	0.944851	4887	3	-0.44955	0.071427	0.076197	1	1425	1	-0.44955
VEPH1	4	0.063118	0.17615	0.897315	3743	2	0.019587	0.071476	0.076241	1	1426	1	0.019587
KPNA4	4	0.5658	0.71908	1	13088	2	0.089263	0.071525	0.076279	1	1427	1	0.089263
ADRA2A	4	0.63125	0.76952	1	13963	2	0.8882	0.071574	0.076322	1	1428	1	0.8882
TAF9	4	0.33071	0.54651	1	10134	2	0.44214	0.071623	0.076365	1	1429	1	0.44214
DPRX	4	0.90344	0.9088	1	16602	1	0.52006	0.071672	0.07641	1	1430	1	0.52006
SLC6A11	4	0.65076	0.78468	1	14202	1	1.1216	0.07177	0.076507	1	1431	1	1.1216
ARPC2	4	0.23914	0.43872	1	8308	1	1.0026	0.071819	0.076546	1	1432	1	1.0026
MYL1	4	0.11525	0.26013	0.950301	5225	2	-0.10855	0.071868	0.076593	1	1433	1	-0.10855
PRAMEF1	4	0.41005	0.6036	1	11067	2	-0.10763	0.071917	0.076646	1	1434	1	-0.10763
MRPL12	4	0.49633	0.66696	1	12163	1	0.40156	0.072015	0.076732	1	1435	1	0.40156
ZC3H12C	4	0.56322	0.71714	1	13056	2	0.33357	0.072064	0.076777	1	1436	1	0.33357
TPTE2	4	0.019527	0.062311	0.782084	1504	2	0.28194	0.072113	0.076826	1	1437	1	0.28194
FAM163A	4	0.13201	0.28583	0.966359	5646	2	-0.30079	0.072211	0.07692	1	1438	1	-0.30079
TSGA10IP	4	0.8768	0.89127	1	16230	1	0.74787	0.072309	0.077002	1	1439	1	0.74787
WBSCR16	4	0.30622	0.52561	1	9792	3	-0.62845	0.072652	0.07732	1	1440	1	-0.62845
GABRG3	4	0.14655	0.30772	0.972744	6035	2	0.041529	0.072652	0.07732	1	1441	1	0.041529
PELP1	4	0.59967	0.74506	1	13553	1	1.1563	0.072652	0.07732	1	1442	1	1.1563
PPP4C	4	0.93687	0.93695	1	17114	1	0.65969	0.072652	0.07732	1	1443	1	0.65969
TRNT1	4	0.011149	0.037027	0.731229	956	1	-0.37207	0.072652	0.07732	1	1444	1	-0.37207
EIF2B2	4	0.067695	0.18389	0.900466	3887	2	0.6027	0.072652	0.07732	1	1445	1	0.6027
KRTAP4_3	4	0.99839	0.99837	1	18829	0	1.6169	0.072946	0.077584	1	1446	1	1.6169
NGDN	4	0.035114	0.10574	0.840771	2390	3	-1.139	0.073044	0.077679	1	1447	1	-1.139
TYW1B	4	0.14335	0.30297	0.97104	5958	2	0.04299	0.073191	0.077807	1	1448	1	0.04299
SUMO1	4	0.12209	0.27073	0.95569	5408	1	0.97887	0.073289	0.077892	1	1449	1	0.97887
C15orf26	4	0.9327	0.93292	1	17045	1	0.83194	0.073387	0.077985	1	1450	1	0.83194
MRPL41	4	0.42833	0.61692	1	11279	2	0.37146	0.07346	0.078053	1	1451	1	0.37146
CCL7	4	0.373	0.57679	1	10630	2	0.16244	0.073534	0.078109	1	1452	1	0.16244
MBTD1	4	0.94911	0.94915	1	17381	0	0.42127	0.073583	0.078148	1	1453	1	0.42127
ABHD15	4	0.98379	0.98378	1	18266	0	1.4712	0.073656	0.078215	1	1454	1	1.4712
WTH3DI	4	0.81956	0.86155	1	15641	1	1.1264	0.073656	0.078215	1	1455	1	1.1264
ABCF3	4	0.33651	0.55068	1	10196	1	0.63102	0.07373	0.078284	1	1456	1	0.63102
TMEM171	4	0.78034	0.84511	1	15323	1	0.55734	0.073827	0.078387	1	1457	1	0.55734
CHRNB1	4	0.97958	0.97971	1	18159	0	1.2393	0.073876	0.07844	1	1458	1	1.2393
GCNT4	4	0.76432	0.83898	1	15213	1	0.70573	0.073925	0.078478	1	1459	1	0.70573
HAP1	4	0.99362	0.99365	1	18578	0	1.4935	0.074023	0.078558	1	1460	1	1.4935
RFTN2	4	0.26696	0.47555	1	8976	3	-0.30416	0.074072	0.078595	1	1461	1	-0.30416
LIF	4	0.16936	0.34141	0.988439	6593	2	0.17125	0.074121	0.078642	1	1462	1	0.17125
MRPL51	4	0.002227	0.00797	0.57047	266	3	-1.1336	0.07417	0.07868	1	1463	1	-1.1336
KIAA2013	4	0.63533	0.77264	1	14003	2	0.31896	0.074219	0.078728	1	1464	1	0.31896
CHST10	4	0.99917	0.99917	1	18911	0	1.4167	0.074268	0.078771	1	1465	1	1.4167
KRTAP9_7	4	0.99763	0.99763	1	18777	0	2.0581	0.074317	0.078822	1	1466	1	2.0581
GRIFIN	4	0.53664	0.697	1	12683	2	0.65136	0.074366	0.078858	1	1467	1	0.65136
OR5D18	4	0.68393	0.81072	1	14674	1	1.9286	0.074415	0.078905	1	1468	1	1.9286
EFCAB13	4	0.92645	0.92727	1	16948	1	1.7386	0.074463	0.07895	1	1469	1	1.7386
SNX33	4	0.22026	0.41314	0.999468	7886	1	0.66091	0.07461	0.079086	1	1470	1	0.66091
FAM19A1	4	0.48294	0.65694	1	11967	1	2.029	0.074659	0.079131	1	1471	1	2.029
SARS2	4	0.35271	0.56222	1	10377	1	0.50303	0.07593	0.080339	1	1472	1	0.50303
ECD	4	0.30963	0.52991	1	9864	3	-0.28026	0.07593	0.080339	1	1473	1	-0.28026
PCNA	4	0.084474	0.21154	0.921409	4369	1	-0.13735	0.07593	0.080339	1	1474	1	-0.13735
UBXN10	4	0.55969	0.71446	1	13003	1	0.67147	0.07593	0.080339	1	1475	1	0.67147
DDAH1	4	0.028104	0.086523	0.817406	2013	2	-0.14413	0.07593	0.080339	1	1476	1	-0.14413
CCNA2	4	0.1103	0.25248	0.947427	5083	3	-1.0244	0.07593	0.080339	1	1477	1	-1.0244
NOL9	4	0.14655	0.30772	0.972744	6036	2	-0.27149	0.07593	0.080339	1	1478	1	-0.27149
NEDD1	4	0.27566	0.48679	1	9170	3	-0.72483	0.07593	0.080339	1	1479	1	-0.72483
GPN2	4	0.39343	0.5915	1	10883	2	-0.03858	0.07593	0.080339	1	1480	1	-0.03858
VARS	4	0.57628	0.72706	1	13225	2	-0.28309	0.07593	0.080339	1	1481	1	-0.28309
ATP5B	4	0.27642	0.48779	1	9187	3	-1.1146	0.07593	0.080339	1	1482	1	-1.1146
NOC4L	4	0.97944	0.97956	1	18157	0	0.33432	0.07593	0.080339	1	1483	1	0.33432
HNRNPK	4	0.22183	0.41527	0.99955	7928	1	0.75837	0.07593	0.080339	1	1484	1	0.75837
CKAP5	4	0.30679	0.52635	1	9808	3	-0.49039	0.07593	0.080339	1	1485	1	-0.49039
ZNF19	4	0.029997	0.091782	0.824344	2120	3	-0.95507	0.07593	0.080339	1	1486	1	-0.95507
WDR75	4	0.67874	0.80666	1	14601	2	0.61178	0.07593	0.080339	1	1487	1	0.61178
IRF1	4	0.16236	0.33122	0.983288	6431	3	-0.87437	0.07593	0.080339	1	1488	1	-0.87437
SF3A2	4	0.64117	0.77714	1	14088	1	1.2023	0.07593	0.080339	1	1489	1	1.2023
ARFRP1	4	0.44595	0.62958	1	11504	2	-0.70292	0.07593	0.080339	1	1490	1	-0.70292
POLR2L	4	0.68462	0.81125	1	14685	2	-0.36776	0.07593	0.080339	1	1491	1	-0.36776
REV3L	4	0.80716	0.85611	1	15542	1	0.10744	0.07593	0.080339	1	1492	1	0.10744
TAF1B	4	0.18069	0.3577	0.989216	6904	2	-0.23121	0.07593	0.080339	1	1493	1	-0.23121
FARSA	4	0.6864	0.81268	1	14702	2	0.56901	0.07593	0.080339	1	1494	1	0.56901
IMP4	4	0.8314	0.8671	1	15748	1	1.0939	0.07593	0.080339	1	1495	1	1.0939
HIST2H3A	4	0.62316	0.76324	1	13855	2	0.41768	0.07593	0.080339	1	1496	1	0.41768
POTEG	4	0.3955	0.59304	1	10901	1	0.47839	0.07593	0.080339	1	1497	1	0.47839
ICA1	4	0.39532	0.5929	1	10899	1	0.54017	0.07593	0.080339	1	1498	1	0.54017
POLR2C	4	0.30311	0.52173	1	9728	2	-0.2549	0.07593	0.080339	1	1499	1	-0.2549
UBA52	4	0.93654	0.9366	1	17111	1	0.56991	0.07593	0.080339	1	1500	1	0.56991
CSNK1A1	4	0.093248	0.22574	0.932861	4617	3	-0.8645	0.07593	0.080339	1	1501	1	-0.8645
PKMYT1	4	0.99844	0.99842	1	18834	0	0.96921	0.07593	0.080339	1	1502	1	0.96921
CAPN14	4	0.28435	0.49804	1	9373	3	-0.16708	0.07593	0.080339	1	1503	1	-0.16708
ARMC7	4	0.68096	0.8084	1	14627	2	0.3653	0.077273	0.081531	1	1504	1	0.3653
KRTAP1_4	4	0.9811	0.98112	1	18195	0	0.76542	0.077346	0.081605	1	1505	1	0.76542
VAMP8	4	0.89428	0.90237	1	16477	1	0.78627	0.077395	0.081645	1	1506	1	0.78627
PABPC5	4	0.9551	0.95512	1	17536	0	1.2153	0.077444	0.081688	1	1507	1	1.2153
EVI2A	4	0.90277	0.9083	1	16592	1	1.3409	0.077492	0.08173	1	1508	1	1.3409
G6PC2	4	0.90261	0.90819	1	16589	1	0.56232	0.077541	0.081771	1	1509	1	0.56232
FNDC4	4	0.66754	0.79779	1	14443	1	0.58516	0.07759	0.081816	1	1510	1	0.58516
CCDC88A	4	0.66428	0.79519	1	14393	2	0.72098	0.077687	0.081902	1	1511	1	0.72098
FKBP15	4	0.012562	0.041397	0.742115	1064	3	-0.55649	0.077736	0.081946	1	1512	1	-0.55649
AHCY	4	0.18176	0.35925	0.990043	6927	1	0.40814	0.077834	0.082041	1	1513	1	0.40814
TF	4	0.45702	0.63774	1	11653	1	0.68688	0.077931	0.082132	1	1514	1	0.68688
TAF1C	4	0.54554	0.70375	1	12804	1	0.89973	0.07798	0.082175	1	1515	1	0.89973
ZMYND8	4	0.53351	0.69466	1	12647	2	-0.12333	0.078029	0.082231	1	1516	1	-0.12333
ANAPC13	4	0.93329	0.9335	1	17062	1	0.99667	0.078102	0.082297	1	1517	1	0.99667
KRTAP4_4	4	0.78988	0.84892	1	15393	1	0.87736	0.078224	0.082397	1	1518	1	0.87736
ARHGAP27	4	0.99761	0.99761	1	18775	0	1.8113	0.078273	0.082441	1	1519	1	1.8113
SSR2	4	0.28544	0.49944	1	9400	3	-0.14871	0.078468	0.082619	1	1520	1	-0.14871
GAA	4	0.96614	0.96621	1	17815	0	0.32878	0.078517	0.082661	1	1521	1	0.32878
CCL3L3	4	0.55584	0.71151	1	12947	1	0.98265	0.078565	0.082696	1	1522	1	0.98265
PPP2R2A	4	0.98489	0.98488	1	18304	0	1.308	0.078614	0.082746	1	1523	1	1.308
PPP2CA	4	0.89918	0.90575	1	16534	1	1.1817	0.078663	0.082794	1	1524	1	1.1817
TMSB10	4	0.99834	0.99832	1	18824	0	1.5089	0.078712	0.082829	1	1525	1	1.5089
SUSD5	4	0.082749	0.20873	0.920658	4322	3	-0.49408	0.07876	0.082887	1	1526	1	-0.49408
PTPN13	4	0.54311	0.7019	1	12767	2	-0.084656	0.078809	0.082934	1	1527	1	-0.084656
ATRAID	4	0.62027	0.76099	1	13815	2	-0.15318	0.078906	0.083024	1	1528	1	-0.15318
CNTF	4	0.99929	0.99931	1	18927	0	1.5054	0.078955	0.083061	1	1529	1	1.5054
CLPSL1	4	0.90117	0.90714	1	16563	1	1.1519	0.079004	0.083116	1	1530	1	1.1519
MXD3	4	0.25286	0.45706	1	8637	2	0.16783	0.079053	0.083157	1	1531	1	0.16783
GHRHR	4	0.20925	0.39806	0.998651	7585	2	0.73295	0.079101	0.083206	1	1532	1	0.73295
SV2A	4	0.70744	0.81961	1	14837	1	0.4421	0.07915	0.08325	1	1533	1	0.4421
CSNK1D	4	0.073387	0.19331	0.909358	4045	2	0.65634	0.079199	0.08329	1	1534	1	0.65634
CMTM1	4	0.93622	0.93627	1	17102	1	1.3869	0.079248	0.083341	1	1535	1	1.3869
MYO7A	4	0.66718	0.7975	1	14437	2	0.72076	0.079345	0.083433	1	1536	1	0.72076
PROS1	4	0.23713	0.43602	1	8266	3	-0.43238	0.079394	0.083478	1	1537	1	-0.43238
CDK6	4	0.11478	0.25944	0.949842	5213	2	0.18804	0.079442	0.08353	1	1538	1	0.18804
RANBP6	4	0.741	0.83063	1	15059	1	0.75403	0.079491	0.083575	1	1539	1	0.75403
RASSF6	4	0.38824	0.58769	1	10805	2	0.96117	0.07954	0.083625	1	1540	1	0.96117
PMPCB	4	0.15465	0.31983	0.978381	6241	3	-0.56981	0.07971	0.08378	1	1541	1	-0.56981
RPL37	4	0.56453	0.7181	1	13073	2	0.0097703	0.07971	0.08378	1	1542	1	0.0097703
ATP5I	4	0.4814	0.6558	1	11946	2	0.84011	0.07971	0.08378	1	1543	1	0.84011
NPHP3	4	0.073434	0.1934	0.909358	4047	3	-0.76022	0.079832	0.083887	1	1544	1	-0.76022
PIGA	4	0.49081	0.66278	1	12087	2	-0.15208	0.079881	0.08393	1	1545	1	-0.15208
NEIL1	4	0.58932	0.7371	1	13414	2	0.10899	0.080027	0.084051	1	1546	1	0.10899
GOLGA6B	4	0.091223	0.22252	0.930133	4565	1	0.91545	0.080124	0.084147	1	1547	1	0.91545
FUT6	4	0.86957	0.88698	1	16155	1	0.85761	0.080173	0.084192	1	1548	1	0.85761
ARFGEF1	4	0.010404	0.034736	0.731229	901	2	-0.14722	0.08027	0.084269	1	1549	1	-0.14722
LPPR4	4	0.77265	0.84212	1	15269	1	0.54586	0.080319	0.084318	1	1550	1	0.54586
ZNF645	4	0.15276	0.31698	0.97704	6188	3	-0.48067	0.080368	0.084362	1	1551	1	-0.48067
USP22	4	0.99822	0.99821	1	18815	0	1.9751	0.080416	0.084401	1	1552	1	1.9751
OR51D1	4	0.89266	0.90126	1	16448	1	0.77572	0.080465	0.084448	1	1553	1	0.77572
CD22	4	0.49585	0.6666	1	12158	1	1.2916	0.080514	0.084486	1	1554	1	1.2916
MAL2	4	0.41585	0.60776	1	11140	1	1.1603	0.08066	0.084631	1	1555	1	1.1603
C4A	4	0.27499	0.48593	1	9159	2	0.035008	0.080806	0.084776	1	1556	1	0.035008
HIST2H2AC	4	0.13249	0.28655	0.966525	5657	3	-0.88747	0.080903	0.084871	1	1557	1	-0.88747
COX6A2	4	0.31529	0.53554	1	9950	2	-0.36798	0.080952	0.084911	1	1558	1	-0.36798
PABPC1	4	0.92901	0.92955	1	16988	1	0.37093	0.081049	0.084999	1	1559	1	0.37093
SUSD4	4	0.097986	0.23321	0.938594	4734	3	-0.93665	0.081098	0.08505	1	1560	1	-0.93665
GCSAML	4	0.1671	0.33814	0.986345	6546	3	-0.58056	0.081146	0.085106	1	1561	1	-0.58056
ERMARD	4	0.14862	0.31086	0.974054	6092	1	1.4125	0.081244	0.0852	1	1562	1	1.4125
MTA3	4	0.064297	0.17823	0.899104	3776	2	0.30577	0.081341	0.085292	1	1563	1	0.30577
INTS10	4	0.30268	0.52117	1	9715	3	-0.63125	0.081389	0.085337	1	1564	1	-0.63125
KIF7	4	0.18327	0.36136	0.990152	6970	1	0.98908	0.081438	0.08538	1	1565	1	0.98908
DHX8	4	0.92862	0.9292	1	16980	1	1.591	0.081487	0.085432	1	1566	1	1.591
CAPRIN1	4	0.0080618	0.027224	0.712266	724	2	0.44744	0.081535	0.085479	1	1567	1	0.44744
UBE2Q2L	4	0.99298	0.99301	1	18556	0	1.0936	0.081584	0.085519	1	1568	1	1.0936
APOL1	4	0.9668	0.96685	1	17830	0	0.46887	0.081633	0.085567	1	1569	1	0.46887
COX18	4	0.047417	0.1378	0.868092	3022	3	-0.90597	0.081706	0.085634	1	1570	1	-0.90597
MME	4	0.94681	0.94686	1	17336	0	0.62121	0.081706	0.085634	1	1571	1	0.62121
ZNF85	4	0.4808	0.65535	1	11939	2	0.82216	0.081779	0.085702	1	1572	1	0.82216
PSG7	4	0.67436	0.8032	1	14534	1	0.53195	0.081851	0.085776	1	1573	1	0.53195
RAB37	4	0.99895	0.99894	1	18894	0	1.6094	0.081851	0.085776	1	1574	1	1.6094
C11orf68	4	0.94123	0.94131	1	17203	0	0.95752	0.081924	0.085834	1	1575	1	0.95752
IQGAP3	4	0.81066	0.85761	1	15572	1	0.31076	0.081973	0.085872	1	1576	1	0.31076
COQ10A	4	0.17206	0.34535	0.988906	6661	1	0.40832	0.082022	0.085916	1	1577	1	0.40832
GATA1	4	0.9923	0.99232	1	18533	0	1.2274	0.08207	0.085969	1	1578	1	1.2274
CTCF	4	0.25081	0.45433	1	8596	2	0.028939	0.082143	0.086028	1	1579	1	0.028939
RBM14_RBM4	4	0.9968	0.99683	1	18712	0	0.97331	0.082143	0.086028	1	1580	1	0.97331
USP35	4	0.83923	0.87082	1	15824	1	1.0737	0.082216	0.086091	1	1581	1	1.0737
ZNF791	4	0.59323	0.74011	1	13465	1	0.97307	0.082265	0.08614	1	1582	1	0.97307
STK39	4	0.89155	0.90056	1	16429	1	1.0312	0.082362	0.086222	1	1583	1	1.0312
GPRC5A	4	0.6327	0.77062	1	13983	1	0.82224	0.08241	0.086266	1	1584	1	0.82224
LOC100506388	4	0.057121	0.16209	0.892209	3464	2	0.14711	0.082508	0.086356	1	1585	1	0.14711
ADAM8	4	0.95002	0.95008	1	17406	0	0.90895	0.082605	0.086436	1	1586	1	0.90895
SDCBP2	4	0.38323	0.58405	1	10743	2	0.11957	0.082653	0.086486	1	1587	1	0.11957
C11orf31	3	0.97835	0.97849	1	18126	0	1.6227	0.082691	0.083589	1	1588	1	1.6227
SPAG7	4	0.9583	0.95832	1	17603	0	1.6777	0.082702	0.086522	1	1589	1	1.6777
STAG2	4	0.51542	0.68115	1	12407	1	1.8722	0.082799	0.086616	1	1590	1	1.8722
DUS1L	4	0.66469	0.79551	1	14400	2	1.1468	0.082945	0.086755	1	1591	1	1.1468
RUNX3	4	0.05851	0.16542	0.893038	3533	3	-0.46051	0.083091	0.086878	1	1592	1	-0.46051
ADIG	4	0.2032	0.38947	0.998651	7433	2	0.2353	0.083139	0.086925	1	1593	1	0.2353
NCOA7	4	0.43735	0.62333	1	11404	2	1.1869	0.083188	0.086967	1	1594	1	1.1869
C6	4	0.56332	0.71722	1	13060	1	0.4022	0.083261	0.087028	1	1595	1	0.4022
DNAJB12	4	0.43975	0.62514	1	11433	2	-0.13653	0.083333	0.087093	1	1596	1	-0.13653
ACVR1B	4	0.013886	0.045455	0.756545	1145	2	-0.83958	0.083382	0.087139	1	1597	1	-0.83958
COL4A3	4	0.060148	0.16941	0.893038	3616	3	-0.52432	0.083431	0.087182	1	1598	1	-0.52432
CTXN3	4	0.85125	0.8768	1	15942	1	0.9622	0.083479	0.087234	1	1599	1	0.9622
CLPTM1L	4	0.234	0.43182	1	8203	2	-0.05732	0.083576	0.087336	1	1600	1	-0.05732
NUDT6	4	0.84227	0.87225	1	15845	1	0.68094	0.083625	0.087385	1	1601	1	0.68094
GPD2	4	0.99516	0.99517	1	18638	0	1.3645	0.083722	0.087473	1	1602	1	1.3645
TTK	3	0.25593	0.40707	0.998651	8713	2	-0.29112	0.083754	0.08465	1	1603	1	-0.29112
ASXL1	4	0.54966	0.70682	1	12859	2	0.062122	0.08377	0.087515	1	1604	1	0.062122
DAGLA	4	0.99997	0.99997	1	19069	0	2.3234	0.083819	0.087549	1	1605	1	2.3234
MMEL1	4	0.60013	0.74543	1	13557	2	0.28895	0.083867	0.087592	1	1606	1	0.28895
KIAA0513	4	0.89189	0.90077	1	16434	1	0.43389	0.083916	0.087633	1	1607	1	0.43389
FAM43B	4	0.49259	0.66417	1	12109	1	0.41123	0.083965	0.087677	1	1608	1	0.41123
SNX7	4	0.055612	0.15845	0.885803	3412	2	0.3647	0.084013	0.087718	1	1609	1	0.3647
ZNF620	4	0.98959	0.98956	1	18434	0	0.85028	0.084062	0.087762	1	1610	1	0.85028
YRDC	4	0.2687	0.47777	1	9011	3	-0.95421	0.084134	0.087831	1	1611	1	-0.95421
MTERF4	4	0.86333	0.88342	1	16079	1	0.54542	0.084207	0.087902	1	1612	1	0.54542
ANKRD24	4	0.72752	0.82611	1	14961	1	0.58583	0.084256	0.087947	1	1613	1	0.58583
TTLL5	4	0.52772	0.69043	1	12565	1	0.17833	0.084304	0.087989	1	1614	1	0.17833
SKIDA1	4	0.50506	0.67347	1	12274	2	-0.079814	0.084353	0.088033	1	1615	1	-0.079814
INO80D	4	0.98214	0.98215	1	18218	0	1.8735	0.084401	0.088077	1	1616	1	1.8735
SCARB2	4	0.46408	0.64293	1	11750	1	0.74355	0.08445	0.088119	1	1617	1	0.74355
CASC3	4	0.97805	0.97822	1	18121	0	1.9691	0.084547	0.088215	1	1618	1	1.9691
WDR89	4	0.057428	0.16282	0.892209	3476	2	0.041978	0.084644	0.088308	1	1619	1	0.041978
RNF20	4	0.26101	0.46787	1	8830	1	0.97721	0.084692	0.088352	1	1620	1	0.97721
FBXO16	4	0.58077	0.73055	1	13288	1	0.21654	0.084741	0.088392	1	1621	1	0.21654
PSMG3	4	0.52791	0.69058	1	12570	1	0.85045	0.084911	0.088549	1	1622	1	0.85045
ESRP2	4	0.61013	0.75315	1	13686	2	0.21353	0.085032	0.088652	1	1623	1	0.21353
GRB2	4	0.86474	0.88422	1	16093	1	1.2703	0.085202	0.088812	1	1624	1	1.2703
TMSB4Y	4	0.14319	0.30274	0.97104	5951	3	-0.30541	0.085274	0.088873	1	1625	1	-0.30541
CRISPLD2	4	0.30863	0.52866	1	9846	2	-0.15907	0.085323	0.088917	1	1626	1	-0.15907
C17orf112	4	0.9712	0.97131	1	17930	0	1.1426	0.085371	0.088954	1	1627	1	1.1426
CCDC25	4	0.88016	0.89328	1	16271	1	1.0097	0.08542	0.088996	1	1628	1	1.0097
HCN4	4	0.081049	0.20594	0.917676	4277	3	-0.53508	0.085517	0.089088	1	1629	1	-0.53508
TSPAN12	4	0.98012	0.98021	1	18172	0	1.2739	0.085565	0.089128	1	1630	1	1.2739
FCRL5	4	0.89315	0.90157	1	16459	1	1.3309	0.085614	0.089163	1	1631	1	1.3309
TULP2	3	0.46107	0.61632	1	11711	1	0.85325	0.08566	0.086423	1	1632	1	0.85325
STK3	4	0.71357	0.82156	1	14879	1	1.2423	0.085662	0.089213	1	1633	1	1.2423
ST14	4	0.62581	0.7653	1	13893	1	0.46671	0.085759	0.089289	1	1634	1	0.46671
TOR1B	4	0.39119	0.58986	1	10848	2	0.44877	0.085808	0.089334	1	1635	1	0.44877
DHX29	4	0.061557	0.17283	0.893038	3688	3	-0.51122	0.085856	0.089373	1	1636	1	-0.51122
KRTAP9_2	4	0.99839	0.99837	1	18830	0	1.5568	0.085904	0.089418	1	1637	1	1.5568
TMEM97	4	0.85922	0.88108	1	16039	1	1.3517	0.085953	0.089465	1	1638	1	1.3517
OLAH	4	0.014823	0.048363	0.756545	1214	2	-0.73394	0.086001	0.089508	1	1639	1	-0.73394
ANKRD20A1	4	0.916	0.9184	1	16793	1	0.66441	0.086098	0.089601	1	1640	1	0.66441
UBP1	4	0.80789	0.85641	1	15545	1	0.63959	0.086195	0.089699	1	1641	1	0.63959
ZNF830	4	0.90531	0.91015	1	16630	1	0.97995	0.086244	0.089744	1	1642	1	0.97995
TLCD1	4	0.99975	0.99976	1	18997	0	2.0997	0.086292	0.089795	1	1643	1	2.0997
THAP10	4	0.64676	0.78155	1	14163	2	0.73559	0.08634	0.08983	1	1644	1	0.73559
CTNND1	4	0.83253	0.86761	1	15761	1	1.7537	0.086389	0.089871	1	1645	1	1.7537
OR10H5	4	0.98723	0.98718	1	18362	0	1.3418	0.086437	0.089921	1	1646	1	1.3418
TMEM74B	4	0.77319	0.84231	1	15273	1	1.5309	0.086486	0.089967	1	1647	1	1.5309
TRMT11	4	0.99203	0.99205	1	18523	0	1.0858	0.086558	0.090029	1	1648	1	1.0858
KIAA0100	4	0.99992	0.99992	1	19041	0	2.02	0.086558	0.090029	1	1649	1	2.02
PIPOX	4	0.99516	0.99517	1	18639	0	1.4107	0.086631	0.090097	1	1650	1	1.4107
FAM111A	4	0.98833	0.98833	1	18394	0	1.2254	0.08668	0.090138	1	1651	1	1.2254
PABPC1L2A	4	0.89403	0.90219	1	16473	1	1.1716	0.086728	0.09018	1	1652	1	1.1716
DNAJC27	4	0.15558	0.32121	0.978765	6266	3	-0.26545	0.086776	0.090218	1	1653	1	-0.26545
SERPINB7	4	0.25112	0.45472	1	8606	2	0.42203	0.086825	0.090264	1	1654	1	0.42203
ABCC6	4	0.083163	0.20942	0.921409	4334	2	0.11642	0.086922	0.09035	1	1655	1	0.11642
RCN1	4	0.25927	0.46557	1	8783	1	0.61017	0.08697	0.090395	1	1656	1	0.61017
EIF2D	4	0.39924	0.5957	1	10950	2	-0.050803	0.087018	0.090446	1	1657	1	-0.050803
MRPL44	4	0.25258	0.4567	1	8630	3	-0.47763	0.087067	0.090484	1	1658	1	-0.47763
WHSC1L1	4	0.27032	0.4799	1	9052	3	-0.63055	0.087115	0.09052	1	1659	1	-0.63055
ADGRG6	4	0.36032	0.56762	1	10480	1	1.884	0.087164	0.090561	1	1660	1	1.884
SMN2	4	0.022713	0.071405	0.794073	1703	3	-1.3964	0.087212	0.090608	1	1661	1	-1.3964
FBLN7	4	0.69544	0.81594	1	14756	1	0.57591	0.087309	0.0907	1	1662	1	0.57591
CCL4L2	4	0.89683	0.9041	1	16507	1	1.4898	0.087357	0.090741	1	1663	1	1.4898
DNAJA2	4	0.056357	0.16032	0.888516	3441	3	-0.46058	0.087406	0.090789	1	1664	1	-0.46058
ABCA9	4	0.98127	0.98129	1	18198	0	2.3776	0.087454	0.090832	1	1665	1	2.3776
DFNB59	4	0.047246	0.13737	0.868092	3015	2	-0.47959	0.087502	0.090876	1	1666	1	-0.47959
EXOSC6	4	0.57365	0.72497	1	13185	2	0.32214	0.087551	0.090911	1	1667	1	0.32214
KLHDC4	4	0.42765	0.61642	1	11270	2	0.15965	0.087599	0.09095	1	1668	1	0.15965
TOP1MT	4	0.94133	0.9414	1	17205	0	0.065296	0.087648	0.090991	1	1669	1	0.065296
SLC50A1	4	0.291	0.50649	1	9490	2	-0.1675	0.087744	0.091084	1	1670	1	-0.1675
C1orf56	4	0.14312	0.30263	0.97104	5949	3	-0.53839	0.087793	0.091131	1	1671	1	-0.53839
SEZ6	4	0.99994	0.99994	1	19051	0	2.4001	0.087841	0.091186	1	1672	1	2.4001
AQP11	4	0.99005	0.99002	1	18456	0	1.174	0.08789	0.091234	1	1673	1	1.174
PTPN2	4	0.1969	0.3806	0.996211	7288	3	-0.50934	0.087938	0.091281	1	1674	1	-0.50934
INHBC	4	0.23162	0.42856	1	8145	1	1.2765	0.087986	0.091332	1	1675	1	1.2765
PRKACA	4	0.064198	0.17805	0.899104	3774	3	-0.28943	0.088083	0.091417	1	1676	1	-0.28943
TMIGD1	4	0.90279	0.90831	1	16593	1	1.165	0.088131	0.091458	1	1677	1	1.165
EML6	4	0.50209	0.67131	1	12235	2	0.96238	0.08818	0.091512	1	1678	1	0.96238
GLT1D1	4	0.79743	0.85199	1	15454	1	0.70935	0.088228	0.091555	1	1679	1	0.70935
ENTHD1	4	0.64857	0.78297	1	14174	1	1.1325	0.088325	0.091649	1	1680	1	1.1325
TMEM127	4	0.81072	0.85764	1	15574	1	0.97336	0.088373	0.091697	1	1681	1	0.97336
BRAP	4	0.93654	0.9366	1	17110	1	0.42706	0.088422	0.091743	1	1682	1	0.42706
DUSP11	4	0.95932	0.95934	1	17630	0	2.1624	0.08847	0.091782	1	1683	1	2.1624
TG	4	0.13849	0.2957	0.968948	5813	1	0.69267	0.088518	0.091825	1	1684	1	0.69267
VCX	4	0.58922	0.73702	1	13413	1	0.72134	0.088567	0.091871	1	1685	1	0.72134
FLOT2	4	0.99118	0.99119	1	18494	0	1.8918	0.088615	0.091919	1	1686	1	1.8918
EBLN1	4	0.033497	0.10141	0.835411	2315	2	-0.076229	0.088712	0.092019	1	1687	1	-0.076229
SDHAF2	4	0.99996	0.99996	1	19064	0	1.9049	0.088857	0.092149	1	1688	1	1.9049
PKHD1	4	0.13773	0.29455	0.968948	5793	2	0.38654	0.088905	0.092196	1	1689	1	0.38654
TUSC1	4	0.92867	0.92924	1	16981	1	0.21124	0.088953	0.092236	1	1690	1	0.21124
S1PR3	4	0.94241	0.94249	1	17230	0	0.66475	0.089002	0.092275	1	1691	1	0.66475
FAM151A	4	0.31017	0.5306	1	9878	2	0.3999	0.08905	0.092321	1	1692	1	0.3999
GNPDA2	4	0.8909	0.90013	1	16422	1	0.59207	0.089147	0.092418	1	1693	1	0.59207
GHITM	4	0.012066	0.039867	0.739953	1027	3	-0.95676	0.089195	0.092457	1	1694	1	-0.95676
TMEM131	4	0.52567	0.68892	1	12543	2	0.14689	0.089243	0.092507	1	1695	1	0.14689
TOP3A	4	0.99353	0.99356	1	18575	0	1.1563	0.089292	0.092551	1	1696	1	1.1563
TGFB2	4	0.0096837	0.032455	0.731229	839	3	-0.67361	0.089485	0.092727	1	1697	1	-0.67361
RAB7B	4	0.9594	0.95942	1	17634	0	0.5747	0.089533	0.092772	1	1698	1	0.5747
STX3	4	0.87855	0.8923	1	16253	1	1.6997	0.089582	0.092814	1	1699	1	1.6997
SPNS3	4	0.62676	0.76603	1	13910	2	0.81764	0.08963	0.092859	1	1700	1	0.81764
ZFP41	4	0.86864	0.88646	1	16141	1	0.78372	0.089678	0.092901	1	1701	1	0.78372
SYNJ2BP	4	0.0071708	0.024447	0.704244	660	3	-1.1412	0.089727	0.092945	1	1702	1	-1.1412
GNPNAT1	4	0.00051897	0.0019036	0.333772	107	3	-2.5105	0.089775	0.092994	1	1703	1	-2.5105
MRPS21	4	0.31097	0.5316	1	9891	3	-0.43076	0.089896	0.093103	1	1704	1	-0.43076
HSD11B1L	4	0.29062	0.50603	1	9481	3	-0.33376	0.089968	0.09317	1	1705	1	-0.33376
YY1	4	0.27337	0.48389	1	9117	3	-0.50786	0.090137	0.093314	1	1706	1	-0.50786
LHX1	4	0.88923	0.89901	1	16394	1	1.625	0.090137	0.093314	1	1707	1	1.625
EFTUD1	4	0.13814	0.29517	0.968948	5807	2	-0.53561	0.090137	0.093314	1	1708	1	-0.53561
RNF138	4	0.94043	0.94051	1	17188	0	1.0199	0.090306	0.093482	1	1709	1	1.0199
CFL2	4	0.56354	0.71738	1	13063	2	0.16399	0.090354	0.093529	1	1710	1	0.16399
VIMP	4	0.23013	0.42651	1	8118	1	0.63246	0.090451	0.093615	1	1711	1	0.63246
ART5	4	0.95607	0.95611	1	17559	0	1.2114	0.090548	0.093713	1	1712	1	1.2114
ZNF750	4	0.7646	0.83907	1	15215	1	0.87299	0.090596	0.093753	1	1713	1	0.87299
PCBP1	4	0.68245	0.80955	1	14650	2	-0.090961	0.090644	0.093796	1	1714	1	-0.090961
TLE1	4	0.1476	0.3093	0.973779	6059	3	-0.35019	0.090741	0.093878	1	1715	1	-0.35019
MST1L	4	0.039163	0.11648	0.848743	2617	3	-0.93332	0.090934	0.094068	1	1716	1	-0.93332
OSBP	3	0.3685	0.52333	1	10581	2	-0.94217	0.09096	0.091399	1	1717	1	-0.94217
TRPM7	4	0.93557	0.93567	1	17093	1	0.73307	0.090982	0.094118	1	1718	1	0.73307
SULT2A1	4	0.22047	0.41341	0.999468	7891	1	0.72314	0.09103	0.094159	1	1719	1	0.72314
SSX4	4	0.70618	0.81921	1	14827	1	1.2261	0.091175	0.094313	1	1720	1	1.2261
SPC25	4	0.27006	0.47956	1	9047	3	-0.53385	0.091223	0.09436	1	1721	1	-0.53385
NSUN5	4	0.94002	0.94013	1	17175	0	0.39107	0.091271	0.0944	1	1722	1	0.39107
MBLAC2	4	0.55767	0.71294	1	12977	1	0.48559	0.09132	0.094435	1	1723	1	0.48559
TMEM183A	4	0.81537	0.85967	1	15606	1	0.36696	0.091368	0.09448	1	1724	1	0.36696
CANX	4	0.24011	0.44	1	8332	1	0.73282	0.091416	0.094525	1	1725	1	0.73282
DEFB121	4	0.48399	0.65772	1	11984	2	0.86704	0.091464	0.094569	1	1726	1	0.86704
PPAP2A	4	0.92475	0.92577	1	16926	1	1.2107	0.091513	0.094608	1	1727	1	1.2107
MGST1	4	0.69834	0.81681	1	14773	1	0.3165	0.091706	0.094781	1	1728	1	0.3165
CCDC184	4	0.18198	0.35953	0.990043	6934	1	1.2015	0.091778	0.09485	1	1729	1	1.2015
NIT2	4	0.80977	0.85723	1	15564	1	0.85115	0.09185	0.094922	1	1730	1	0.85115
TNKS1BP1	4	0.99625	0.99627	1	18683	0	1.7809	0.091898	0.094967	1	1731	1	1.7809
ANKRD36B	4	0.76075	0.83766	1	15187	1	0.98128	0.091947	0.095011	1	1732	1	0.98128
ARL5C	4	0.99378	0.99381	1	18583	0	1.7949	0.091995	0.095059	1	1733	1	1.7949
PLN	4	0.73646	0.82903	1	15024	1	0.36259	0.092091	0.095157	1	1734	1	0.36259
CUTA	4	0.63993	0.77616	1	14070	2	0.28496	0.09214	0.095206	1	1735	1	0.28496
FKBP1B	4	0.4381	0.62391	1	11413	1	1.1807	0.092188	0.095245	1	1736	1	1.1807
POLR1A	4	0.35271	0.56222	1	10376	2	-0.24662	0.092501	0.095548	1	1737	1	-0.24662
PRMT5	4	0.017855	0.057448	0.775588	1408	3	-2.2307	0.092501	0.095548	1	1738	1	-2.2307
RTEL1	4	0.21208	0.40195	0.998651	7654	2	1.9386e-05	0.092501	0.095548	1	1739	1	1.9386e-05
WDR43	4	0.73838	0.82969	1	15043	1	1.2345	0.092501	0.095548	1	1740	1	1.2345
OR5M11	4	0.99874	0.99873	1	18868	0	1.5577	0.092814	0.095858	1	1741	1	1.5577
C2orf27B	4	0.25497	0.45982	1	8681	3	-0.36115	0.092887	0.095921	1	1742	1	-0.36115
EXOSC5	4	0.083358	0.20973	0.921409	4336	3	-0.60269	0.092887	0.095921	1	1743	1	-0.60269
EAF2	4	0.37409	0.57759	1	10644	1	0.45759	0.092959	0.095993	1	1744	1	0.45759
KIAA2012	4	0.25154	0.45529	1	8611	3	-0.12381	0.093055	0.096087	1	1745	1	-0.12381
CHMP7	4	0.10692	0.24715	0.945063	4990	2	-0.1492	0.093248	0.096253	1	1746	1	-0.1492
DRAM1	4	0.23834	0.43764	1	8294	1	0.86782	0.093344	0.096338	1	1747	1	0.86782
STAB1	4	0.074048	0.19437	0.909358	4068	2	0.49269	0.093392	0.096387	1	1748	1	0.49269
EHMT1	4	0.90653	0.91104	1	16646	1	1.063	0.09344	0.09643	1	1749	1	1.063
TOMM20	4	0.93441	0.93458	1	17078	1	0.97855	0.093537	0.096524	1	1750	1	0.97855
NSMCE1	4	0.93331	0.93351	1	17063	1	0.95461	0.093585	0.096568	1	1751	1	0.95461
MS4A12	4	0.39031	0.58922	1	10834	2	0.57347	0.093729	0.096697	1	1752	1	0.57347
ST5	4	0.53413	0.69511	1	12651	2	0.34253	0.093778	0.096742	1	1753	1	0.34253
ZNF473	4	0.092088	0.2239	0.932272	4584	3	-0.41562	0.093874	0.09683	1	1754	1	-0.41562
AP3D1	4	0.12813	0.27997	0.962377	5552	2	-0.0034034	0.093922	0.096871	1	1755	1	-0.0034034
AP5Z1	4	0.72293	0.82462	1	14927	1	0.44069	0.09397	0.096918	1	1756	1	0.44069
COG2	4	0.010981	0.036497	0.731229	947	3	-1.4245	0.094018	0.096962	1	1757	1	-1.4245
INSL3	4	0.009272	0.031131	0.729148	814	1	0.97508	0.094066	0.097007	1	1758	1	0.97508
ARHGEF15	4	0.81111	0.85781	1	15576	1	1.2435	0.094115	0.097046	1	1759	1	1.2435
RPL37A	4	0.92629	0.92711	1	16946	1	0.53035	0.094187	0.09712	1	1760	1	0.53035
EARS2	4	0.92675	0.92754	1	16949	1	1.2274	0.094187	0.09712	1	1761	1	1.2274
TJP2	4	0.95786	0.95787	1	17591	0	0.24002	0.094259	0.097181	1	1762	1	0.24002
SNAPC3	3	0.13985	0.28322	0.963302	5856	2	-1.1972	0.094276	0.094552	1	1763	1	-1.1972
TNFSF12_TNFSF13	4	0.99146	0.99149	1	18506	0	1.2913	0.094307	0.09723	1	1764	1	1.2913
CNKSR3	4	0.9139	0.91667	1	16756	1	0.62821	0.094355	0.09727	1	1765	1	0.62821
NARS2	4	0.32751	0.54419	1	10095	1	0.44132	0.094403	0.09732	1	1766	1	0.44132
CLCN1	4	0.95851	0.95852	1	17608	0	1.1289	0.094451	0.097363	1	1767	1	1.1289
AXIN1	4	0.62633	0.7657	1	13900	2	0.3505	0.094548	0.097453	1	1768	1	0.3505
USP17L18	4	0.30817	0.52807	1	9838	3	-0.18577	0.094596	0.097498	1	1769	1	-0.18577
DPYSL2	4	0.66682	0.79722	1	14429	2	0.14661	0.094644	0.097549	1	1770	1	0.14661
POLH	4	0.074355	0.19487	0.909358	4079	3	-0.90643	0.094692	0.097598	1	1771	1	-0.90643
FXN	4	0.21362	0.40411	0.998651	7701	3	-0.80668	0.09474	0.097633	1	1772	1	-0.80668
C19orf26	4	0.1079	0.24867	0.946548	5015	2	-0.47385	0.094788	0.09768	1	1773	1	-0.47385
COX7B2	4	0.86495	0.88434	1	16097	1	1.4633	0.094836	0.097727	1	1774	1	1.4633
WFDC10B	4	0.25645	0.46178	1	8721	2	0.83588	0.095029	0.097906	1	1775	1	0.83588
ACOX1	4	0.66081	0.79249	1	14345	2	0.078782	0.095173	0.098045	1	1776	1	0.078782
VGLL4	4	0.98368	0.98366	1	18261	0	1.4794	0.095269	0.098127	1	1777	1	1.4794
PRPF40A	4	0.28531	0.49928	1	9397	3	-0.3778	0.095341	0.098195	1	1778	1	-0.3778
ELP5	4	0.98776	0.98775	1	18376	0	1.3563	0.095341	0.098195	1	1779	1	1.3563
SULT1C3	4	0.2732	0.48367	1	9113	2	-0.052994	0.095413	0.098254	1	1780	1	-0.052994
KRT34	4	0.98222	0.98223	1	18223	0	1.5726	0.09551	0.098354	1	1781	1	1.5726
POLDIP2	4	0.99936	0.99937	1	18938	0	2.1636	0.095558	0.098402	1	1782	1	2.1636
VWA1	4	0.37493	0.57816	1	10651	1	0.42355	0.095606	0.098443	1	1783	1	0.42355
HSPA14	4	0.91906	0.92087	1	16844	1	1.4128	0.095654	0.098483	1	1784	1	1.4128
SPAG16	4	0.11952	0.26677	0.951252	5338	2	-0.68192	0.095702	0.098526	1	1785	1	-0.68192
WBP4	4	0.4507	0.63301	1	11563	2	0.31488	0.09575	0.098571	1	1786	1	0.31488
C15orf53	4	0.066485	0.18189	0.90003	3844	3	-0.70097	0.095798	0.098617	1	1787	1	-0.70097
STXBP2	4	0.72642	0.82576	1	14951	1	0.86382	0.095846	0.09866	1	1788	1	0.86382
OPALIN	4	0.14842	0.31055	0.974054	6087	3	-0.44098	0.095894	0.098698	1	1789	1	-0.44098
NUP62CL	4	0.40236	0.59804	1	10982	2	0.12485	0.095942	0.098745	1	1790	1	0.12485
TLX2	4	0.99535	0.99534	1	18647	0	0.71015	0.09599	0.098783	1	1791	1	0.71015
MED18	4	0.024192	0.075606	0.797894	1802	3	-0.61622	0.096182	0.098961	1	1792	1	-0.61622
GINS2	4	0.5307	0.69261	1	12602	2	0.064795	0.096182	0.098961	1	1793	1	0.064795
RPE	4	0.2687	0.47777	1	9014	3	-1.3279	0.096182	0.098961	1	1794	1	-1.3279
ROMO1	4	0.0033393	0.011782	0.597572	371	3	-1.7964	0.096182	0.098961	1	1795	1	-1.7964
UQCRB	4	0.20595	0.39337	0.998651	7511	2	-0.00023609	0.096182	0.098961	1	1796	1	-0.00023609
HS2ST1	4	0.48728	0.66016	1	12029	2	0.12969	0.096423	0.099187	1	1797	1	0.12969
AIG1	4	0.84273	0.87249	1	15853	1	0.45787	0.096519	0.099279	1	1798	1	0.45787
ZNF664_FAM101A	4	0.17095	0.34375	0.988439	6639	2	0.28501	0.096567	0.099324	1	1799	1	0.28501
MAP6	4	0.74805	0.83314	1	15107	1	1.1313	0.096615	0.099364	1	1800	1	1.1313
RHBDL3	4	0.9988	0.99878	1	18874	0	1.7346	0.096663	0.099408	1	1801	1	1.7346
CRP	4	0.95932	0.95935	1	17631	0	0.30347	0.096711	0.099451	1	1802	1	0.30347
ZNF76	4	0.12436	0.27421	0.958095	5466	3	-0.60722	0.096807	0.099548	1	1803	1	-0.60722
DDX56	4	0.84528	0.87376	1	15873	1	0.43481	0.096903	0.09963	1	1804	1	0.43481
HDAC3	4	0.91287	0.91585	1	16740	1	0.72837	0.096903	0.09963	1	1805	1	0.72837
NPIPB3	4	0.30769	0.52747	1	9827	3	-0.17764	0.096903	0.09963	1	1806	1	-0.17764
ALG14	4	0.36497	0.57102	1	10541	2	-0.10743	0.097023	0.099736	1	1807	1	-0.10743
CCNJ	4	0.72374	0.82488	1	14935	1	0.24045	0.097023	0.099736	1	1808	1	0.24045
RCN2	4	0.0052767	0.018246	0.654255	533	3	-0.82217	0.097095	0.099806	1	1809	1	-0.82217
SDHB	4	0.47738	0.65283	1	11904	2	-0.1774	0.097215	0.09991	1	1810	1	-0.1774
USP17L22	4	0.024802	0.077288	0.799315	1835	3	-0.57111	0.097215	0.09991	1	1811	1	-0.57111
ENKUR	4	0.25292	0.45713	1	8639	2	0.095197	0.097335	0.10001	1	1812	1	0.095197
ZNF703	4	0.43878	0.62439	1	11420	2	0.56138	0.097383	0.10005	1	1813	1	0.56138
ZNF597	4	0.2599	0.46639	1	8798	3	-0.14994	0.097431	0.1001	1	1814	1	-0.14994
MTMR2	4	0.17713	0.35261	0.988906	6804	2	-4.3492e-05	0.097479	0.10015	1	1815	1	-4.3492e-05
ABHD17A	4	0.53947	0.69913	1	12718	1	1.1153	0.097527	0.10019	1	1816	1	1.1153
MFSD5	4	0.90338	0.90875	1	16601	1	0.98388	0.097575	0.10023	1	1817	1	0.98388
MLH1	4	0.28035	0.49291	1	9289	2	0.25	0.097623	0.10027	1	1818	1	0.25
H2AFB1	4	0.29601	0.51281	1	9594	3	-0.60063	0.097671	0.1003	1	1819	1	-0.60063
CHST9	4	0.36603	0.57179	1	10550	2	0.59617	0.097767	0.10039	1	1820	1	0.59617
GOSR1	4	0.99385	0.99388	1	18587	0	1.5012	0.097863	0.10048	1	1821	1	1.5012
RPS29	4	0.37151	0.5757	1	10611	2	0.13974	0.097959	0.10056	1	1822	1	0.13974
MOGAT2	4	0.00016371	0.00064057	0.204043	60	2	-1.5356	0.098007	0.10061	1	1823	1	-1.5356
IHH	4	0.36409	0.57038	1	10535	2	0.11574	0.098055	0.10064	1	1824	1	0.11574
OR5AN1	4	0.99695	0.99698	1	18724	0	1.2707	0.098151	0.10073	1	1825	1	1.2707
PIH1D2	4	0.50773	0.67548	1	12315	1	0.70668	0.098199	0.10077	1	1826	1	0.70668
MRPL16	4	0.68348	0.81038	1	14668	2	0.88652	0.098391	0.10096	1	1827	1	0.88652
SIGLEC7	4	0.85343	0.87797	1	15967	1	0.42873	0.098439	0.101	1	1828	1	0.42873
PIP4K2B	4	0.99964	0.99964	1	18975	0	2.0107	0.098678	0.10121	1	1829	1	2.0107
RTN4R	4	0.96882	0.96888	1	17877	0	1.2187	0.098726	0.10125	1	1830	1	1.2187
NFKBIB	4	0.89008	0.89958	1	16410	1	0.51288	0.098774	0.10129	1	1831	1	0.51288
ACOT12	4	0.64463	0.7799	1	14139	2	0.0022703	0.098822	0.10133	1	1832	1	0.0022703
PANX2	4	0.084123	0.21096	0.921409	4359	3	-0.7979	0.09887	0.10138	1	1833	1	-0.7979
STRA13	4	0.97675	0.97695	1	18079	0	1.0554	0.098918	0.10144	1	1834	1	1.0554
MEOX2	4	0.62379	0.7637	1	13868	2	0.44149	0.098966	0.10149	1	1835	1	0.44149
GSTM5	4	0.87495	0.89018	1	16212	1	0.50577	0.099014	0.10153	1	1836	1	0.50577
PALM2	4	0.8357	0.86913	1	15788	1	0.63025	0.099086	0.10161	1	1837	1	0.63025
CCL1	4	0.97431	0.97446	1	18019	0	1.1673	0.099302	0.10182	1	1838	1	1.1673
RER1	4	0.018727	0.059995	0.77771	1464	2	-0.56819	0.099397	0.10191	1	1839	1	-0.56819
GPD1	4	0.90962	0.91337	1	16679	1	0.50026	0.099445	0.10196	1	1840	1	0.50026
ASPSCR1	4	0.99885	0.99883	1	18881	0	1.672	0.099565	0.10207	1	1841	1	1.672
POLR1B	4	0.6905	0.81449	1	14732	1	0.60646	0.099565	0.10207	1	1842	1	0.60646
ZNF878	4	0.92027	0.92192	1	16857	1	1.2841	0.099637	0.10214	1	1843	1	1.2841
ADRA1A	4	0.50796	0.67565	1	12318	1	0.51335	0.099685	0.10218	1	1844	1	0.51335
ERICH1	4	0.5307	0.69261	1	12605	1	0.84924	0.099781	0.10227	1	1845	1	0.84924
CECR1	4	0.15913	0.32654	0.980937	6351	3	-0.70299	0.099829	0.1023	1	1846	1	-0.70299
WAPAL	4	0.0069278	0.023631	0.700599	640	2	-0.82388	0.099876	0.10234	1	1847	1	-0.82388
MRPL28	4	0.54182	0.70093	1	12752	2	0.28519	0.099924	0.10239	1	1848	1	0.28519
MLLT3	4	0.96884	0.9689	1	17878	0	0.36993	0.099972	0.10243	1	1849	1	0.36993
MINK1	4	0.99877	0.99875	1	18870	0	2.2949	0.10012	0.10257	1	1850	1	2.2949
SLC35G3	4	0.99014	0.99012	1	18461	0	1.5519	0.10016	0.10261	1	1851	1	1.5519
BCAT2	4	0.94347	0.94359	1	17266	0	1.0041	0.10036	0.10277	1	1852	1	1.0041
MLXIPL	4	0.9214	0.9229	1	16875	1	0.65871	0.1004	0.10282	1	1853	1	0.65871
TMEM242	4	0.37257	0.57645	1	10623	2	-0.10483	0.10045	0.10286	1	1854	1	-0.10483
MCIDAS	4	0.97207	0.97221	1	17958	0	0.5827	0.1005	0.1029	1	1855	1	0.5827
TMED5	4	0.21461	0.40548	0.998651	7734	2	0.12002	0.10055	0.10295	1	1856	1	0.12002
LCE1A	4	0.16135	0.32974	0.982258	6409	1	0.95697	0.10059	0.10299	1	1857	1	0.95697
LARP4B	4	0.3312	0.54684	1	10138	2	0.52733	0.10064	0.10303	1	1858	1	0.52733
GRXCR1	4	0.4954	0.66628	1	12149	1	0.47832	0.10069	0.10308	1	1859	1	0.47832
CORO1B	4	0.98435	0.98433	1	18280	0	1.2769	0.10088	0.10326	1	1860	1	1.2769
LRRC69	4	0.39609	0.59347	1	10910	2	-0.053922	0.10098	0.10335	1	1861	1	-0.053922
LHCGR	4	0.95892	0.95894	1	17621	0	1.1493	0.10103	0.10339	1	1862	1	1.1493
RPF1	4	0.054296	0.15517	0.882595	3355	3	-1.155	0.10107	0.10343	1	1863	1	-1.155
RPL10L	4	0.4824	0.65653	1	11960	2	0.11053	0.10112	0.10348	1	1864	1	0.11053
METTL20	4	0.17744	0.35305	0.988906	6813	2	0.19569	0.10117	0.10352	1	1865	1	0.19569
TFAM	4	0.64742	0.78207	1	14167	2	0.3593	0.10122	0.10357	1	1866	1	0.3593
EFCAB2	4	0.9016	0.90746	1	16574	1	1.1722	0.10126	0.10362	1	1867	1	1.1722
OR5M10	4	0.98299	0.983	1	18244	0	1.4765	0.10141	0.10375	1	1868	1	1.4765
EDN1	4	0.77255	0.84207	1	15268	1	0.35562	0.10146	0.10379	1	1869	1	0.35562
VAT1	4	0.98036	0.98043	1	18178	0	2.1365	0.1015	0.10384	1	1870	1	2.1365
ZNF414	4	0.23062	0.42719	1	8129	1	0.15523	0.10155	0.10387	1	1871	1	0.15523
MAP3K14	4	0.88167	0.89418	1	16292	1	1.3082	0.1016	0.10391	1	1872	1	1.3082
ZNF326	4	0.074552	0.19517	0.909358	4089	2	0.1228	0.10165	0.10394	1	1873	1	0.1228
OR10AG1	4	0.99743	0.99742	1	18762	0	1.9061	0.1017	0.10399	1	1874	1	1.9061
ERBB4	4	0.67309	0.80219	1	14518	2	0.33433	0.10174	0.10403	1	1875	1	0.33433
KRT9	4	0.99668	0.99672	1	18705	0	1.5873	0.10179	0.10408	1	1876	1	1.5873
NMNAT2	4	0.82829	0.86556	1	15722	1	0.67226	0.10189	0.10417	1	1877	1	0.67226
RPLP1	4	0.99137	0.99139	1	18501	0	0.40113	0.10193	0.10422	1	1878	1	0.40113
CFHR2	4	0.002434	0.0086947	0.572982	289	2	0.16153	0.10198	0.10426	1	1879	1	0.16153
UNC93A	4	0.95677	0.95678	1	17575	0	0.88811	0.10203	0.10431	1	1880	1	0.88811
MYO1F	4	0.64761	0.78221	1	14168	1	0.72135	0.10208	0.10435	1	1881	1	0.72135
HAND2	4	0.25105	0.45464	1	8603	3	-0.047596	0.10213	0.10439	1	1882	1	-0.047596
GPR162	4	0.33712	0.55109	1	10200	2	0.18743	0.10217	0.10444	1	1883	1	0.18743
C5orf64	4	0.85301	0.87773	1	15961	1	0.42603	0.10227	0.10453	1	1884	1	0.42603
SLC35B1	4	0.71765	0.82288	1	14894	1	0.56567	0.10232	0.10457	1	1885	1	0.56567
LPO	4	0.98674	0.98667	1	18352	0	1.4629	0.10236	0.10462	1	1886	1	1.4629
SOX5	4	0.49597	0.66668	1	12159	2	0.084905	0.10241	0.10466	1	1887	1	0.084905
M6PR	4	0.24763	0.45008	1	8522	3	-0.3713	0.10246	0.10469	1	1888	1	-0.3713
STX17	4	0.20475	0.39168	0.998651	7481	2	0.13172	0.10251	0.10474	1	1889	1	0.13172
FAM53A	4	0.71805	0.82301	1	14897	1	0.89448	0.10256	0.10479	1	1890	1	0.89448
EIF4E1B	4	0.20284	0.38899	0.998651	7419	2	0.51263	0.1026	0.10484	1	1891	1	0.51263
GPN1	4	0.76558	0.83944	1	15221	1	0.046106	0.10268	0.10491	1	1892	1	0.046106
ACLY	4	0.99889	0.99888	1	18887	0	1.4995	0.10268	0.10491	1	1893	1	1.4995
ATP5H	4	0.30252	0.52094	1	9711	3	-0.24877	0.10275	0.10498	1	1894	1	-0.24877
CHRNA6	4	0.81748	0.86061	1	15621	1	0.56678	0.10279	0.10502	1	1895	1	0.56678
ZIC5	4	0.36132	0.56835	1	10490	1	1.2384	0.10284	0.10506	1	1896	1	1.2384
RNF115	4	0.49972	0.66953	1	12205	2	0.14907	0.10291	0.10514	1	1897	1	0.14907
FRS3	4	0.13238	0.28637	0.966525	5654	3	-0.53848	0.10291	0.10514	1	1898	1	-0.53848
HSP90B1	3	0.68197	0.73819	1	14642	1	0.092183	0.10298	0.10309	1	1899	1	0.092183
RNF167	4	0.91418	0.9169	1	16759	1	1.0527	0.10299	0.10521	1	1900	1	1.0527
RGS6	4	0.24056	0.4406	1	8352	2	-0.42401	0.10308	0.10531	1	1901	1	-0.42401
IQCF6	4	0.0030763	0.010862	0.594811	348	2	-0.26864	0.10313	0.10536	1	1902	1	-0.26864
CCDC77	4	0.47043	0.64764	1	11825	2	-0.036084	0.10322	0.10544	1	1903	1	-0.036084
CHRNB4	4	0.90415	0.9093	1	16608	1	1.8015	0.10327	0.10548	1	1904	1	1.8015
SNTB2	4	0.984	0.98399	1	18272	0	0.85831	0.10337	0.10558	1	1905	1	0.85831
CLDN12	4	0.96971	0.96976	1	17890	0	0.30933	0.10342	0.10563	1	1906	1	0.30933
TTC39B	4	0.066686	0.18222	0.90003	3853	2	0.27527	0.10351	0.10572	1	1907	1	0.27527
TLR6	4	0.15319	0.31765	0.977067	6207	3	-0.2385	0.10356	0.10576	1	1908	1	-0.2385
PSPC1	4	0.61737	0.75878	1	13774	1	0.38849	0.10365	0.10585	1	1909	1	0.38849
FOXD4L5	4	0.99411	0.99415	1	18595	0	1.2674	0.1037	0.10589	1	1910	1	1.2674
PIM2	4	0.95159	0.95164	1	17443	0	1.8298	0.10375	0.10594	1	1911	1	1.8298
MS4A3	4	0.21834	0.41058	0.998651	7843	1	1.6941	0.1038	0.10598	1	1912	1	1.6941
SPAG5	4	0.99719	0.99719	1	18743	0	2.0616	0.10389	0.10608	1	1913	1	2.0616
MAPK7	4	0.91699	0.91917	1	16810	1	1.3667	0.10394	0.10612	1	1914	1	1.3667
ACSF2	4	0.9493	0.94935	1	17387	0	1.3361	0.10399	0.10616	1	1915	1	1.3361
CCDC112	4	0.052256	0.15	0.879588	3253	3	-0.81056	0.10404	0.1062	1	1916	1	-0.81056
DGAT2L6	4	0.97056	0.97063	1	17912	0	0.76246	0.10423	0.10638	1	1917	1	0.76246
DDX26B	4	0.50465	0.67317	1	12269	1	1.2835	0.10428	0.10642	1	1918	1	1.2835
C16orf71	4	0.038489	0.11468	0.844251	2591	1	0.53488	0.10432	0.10646	1	1919	1	0.53488
ZCCHC17	4	0.79092	0.84932	1	15399	1	1.3423	0.10437	0.1065	1	1920	1	1.3423
ACTG1	4	0.17962	0.35617	0.988968	6878	2	0.21922	0.10447	0.1066	1	1921	1	0.21922
ZNF329	4	0.92087	0.92243	1	16867	1	0.54856	0.10451	0.10666	1	1922	1	0.54856
ARL5A	4	0.65613	0.78885	1	14288	1	0.35739	0.10466	0.10679	1	1923	1	0.35739
CSF3	4	0.41231	0.60527	1	11091	1	1.7404	0.10475	0.10688	1	1924	1	1.7404
SHANK3	4	0.9897	0.98967	1	18442	0	1.0827	0.1048	0.10693	1	1925	1	1.0827
SAMD9L	4	0.91554	0.91802	1	16787	1	1.2934	0.10485	0.10698	1	1926	1	1.2934
GPR137	4	0.93091	0.93129	1	17013	1	1.1679	0.10499	0.10713	1	1927	1	1.1679
ALLC	4	0.27159	0.4816	1	9078	1	0.17343	0.10504	0.10717	1	1928	1	0.17343
FOXI3	4	0.11768	0.26391	0.951252	5294	2	0.076664	0.10513	0.10725	1	1929	1	0.076664
PRORY	4	0.78272	0.84608	1	15336	1	0.67204	0.10518	0.1073	1	1930	1	0.67204
NUPL1	4	0.042509	0.12523	0.858738	2780	1	0.73596	0.10523	0.10735	1	1931	1	0.73596
TRIB3	4	0.38565	0.58581	1	10769	1	0.97334	0.10537	0.10749	1	1932	1	0.97334
OR4P4	4	0.9973	0.99729	1	18754	0	1.8733	0.10547	0.10758	1	1933	1	1.8733
SRD5A3	4	0.061392	0.17244	0.893038	3673	2	-0.48599	0.10552	0.10762	1	1934	1	-0.48599
DEFB135	4	0.11308	0.25685	0.949502	5163	3	-0.59809	0.10556	0.10767	1	1935	1	-0.59809
CTSD	4	0.84345	0.87285	1	15861	1	0.43001	0.10566	0.10775	1	1936	1	0.43001
TNS2	4	0.19706	0.38082	0.996289	7294	2	0.019318	0.10571	0.10779	1	1937	1	0.019318
GPATCH2L	4	0.34966	0.56007	1	10337	2	-0.23135	0.10585	0.10794	1	1938	1	-0.23135
RTN3	4	0.90614	0.91077	1	16641	1	0.50162	0.1059	0.10799	1	1939	1	0.50162
CCL4	4	0.99252	0.99255	1	18537	0	1.9308	0.10594	0.10804	1	1940	1	1.9308
SEPSECS	4	0.071885	0.19083	0.908464	4000	2	-0.54214	0.10599	0.10808	1	1941	1	-0.54214
NRIP1	4	0.16549	0.33583	0.98576	6503	2	-0.1893	0.10604	0.10812	1	1942	1	-0.1893
LGALS12	4	0.59526	0.74168	1	13495	1	0.64315	0.10609	0.10816	1	1943	1	0.64315
SLC9A6	4	0.52346	0.68727	1	12518	1	1.0347	0.10633	0.10839	1	1944	1	1.0347
ABCD3	4	0.16497	0.33507	0.985512	6492	1	0.5296	0.10637	0.10843	1	1945	1	0.5296
CTSO	4	0.30346	0.52216	1	9738	1	1.3418	0.10642	0.10847	1	1946	1	1.3418
GJD3	4	0.95039	0.95045	1	17418	0	1.2044	0.10647	0.10851	1	1947	1	1.2044
MAP4K2	4	0.22976	0.42602	1	8107	1	1.2336	0.10652	0.10855	1	1948	1	1.2336
F8A2	4	0.98198	0.98201	1	18214	0	1.1672	0.10656	0.1086	1	1949	1	1.1672
TMEM230	4	0.82506	0.86404	1	15686	1	1.2505	0.10664	0.10867	1	1950	1	1.2505
HAVCR2	4	0.24908	0.45202	1	8554	2	-0.089848	0.10664	0.10867	1	1951	1	-0.089848
OR5H6	4	0.5494	0.70662	1	12856	1	0.95207	0.10671	0.10873	1	1952	1	0.95207
FAHD2B	4	0.83837	0.8704	1	15813	1	1.2698	0.10675	0.10877	1	1953	1	1.2698
LANCL2	4	0.12427	0.27406	0.958095	5460	3	-0.38011	0.1068	0.10882	1	1954	1	-0.38011
IFIT1B	4	0.93317	0.93338	1	17059	1	0.95906	0.10685	0.10886	1	1955	1	0.95906
CRHBP	4	0.65035	0.78437	1	14196	2	0.68364	0.1069	0.10891	1	1956	1	0.68364
CNOT1	4	0.9041	0.90927	1	16607	1	1.6964	0.10694	0.10896	1	1957	1	1.6964
SLC15A3	4	0.99254	0.99257	1	18541	0	1.8581	0.10714	0.10914	1	1958	1	1.8581
PFKL	4	0.49421	0.66536	1	12132	2	0.3009	0.10718	0.10919	1	1959	1	0.3009
RPS10_NUDT3	3	0.554	0.67718	1	12924	1	0.43728	0.10719	0.10719	1	1960	1	0.43728
LOC100144595	3	0.99045	0.99057	1	18470	0	0.90006	0.10719	0.10719	1	1961	1	0.90006
ADSL	3	0.14583	0.28971	0.967506	6016	2	-1.3822	0.10719	0.10719	1	1962	1	-1.3822
SF3A1	3	0.98022	0.98033	1	18174	0	0.90006	0.10719	0.10719	1	1963	1	0.90006
TMEFF1	4	0.073181	0.19299	0.909358	4040	3	-0.86371	0.10728	0.10928	1	1964	1	-0.86371
SRI	4	0.67141	0.80087	1	14492	1	0.57422	0.10733	0.10933	1	1965	1	0.57422
PLCXD1	4	0.47762	0.65299	1	11907	1	0.29738	0.10737	0.10938	1	1966	1	0.29738
SLC3A2	4	0.9848	0.9848	1	18296	0	1.0534	0.10742	0.10942	1	1967	1	1.0534
TMEM216	4	0.84967	0.87602	1	15924	1	1.4037	0.10747	0.10946	1	1968	1	1.4037
SYCP2L	4	0.044022	0.12924	0.865189	2848	3	-0.74736	0.10752	0.1095	1	1969	1	-0.74736
PCED1B	4	0.99378	0.9938	1	18582	0	1.5362	0.10756	0.10954	1	1970	1	1.5362
TFRC	4	0.10478	0.24379	0.944851	4924	2	-0.040757	0.10761	0.10959	1	1971	1	-0.040757
CHGB	4	0.97486	0.97502	1	18032	0	0.77084	0.10766	0.10963	1	1972	1	0.77084
C17orf62	4	0.99616	0.99617	1	18681	0	1.2261	0.10771	0.10968	1	1973	1	1.2261
SNF8	4	0.25229	0.4563	1	8625	1	0.53569	0.10775	0.10972	1	1974	1	0.53569
MRPL52	4	0.93463	0.9348	1	17082	1	0.40389	0.10785	0.1098	1	1975	1	0.40389
BARX2	4	0.32075	0.53939	1	10025	2	0.25507	0.1079	0.10985	1	1976	1	0.25507
LRRC46	4	0.8927	0.90128	1	16449	1	0.94714	0.10794	0.1099	1	1977	1	0.94714
ZNF497	4	0.29723	0.51436	1	9619	2	0.29632	0.10809	0.11003	1	1978	1	0.29632
METTL12	4	0.94704	0.94711	1	17340	0	1.5119	0.10813	0.11008	1	1979	1	1.5119
OR5D14	4	0.91937	0.92114	1	16849	1	1.3679	0.10818	0.11013	1	1980	1	1.3679
SLC12A9	4	0.8641	0.88386	1	16088	1	0.53265	0.10823	0.11017	1	1981	1	0.53265
ZNF280A	4	0.29704	0.51412	1	9615	1	0.95319	0.10837	0.1103	1	1982	1	0.95319
NBPF8	4	0.053135	0.15223	0.880674	3298	3	-1.0905	0.10844	0.11036	1	1983	1	-1.0905
TPD52L3	4	0.076215	0.19799	0.910233	4144	3	-0.79194	0.10852	0.11043	1	1984	1	-0.79194
OR5B21	4	0.99857	0.99854	1	18848	0	2.0577	0.10861	0.11053	1	1985	1	2.0577
CCER2	4	0.97239	0.97254	1	17972	0	0.51374	0.10866	0.11056	1	1986	1	0.51374
LRTM1	4	0.35722	0.56543	1	10435	2	0.37248	0.10875	0.11065	1	1987	1	0.37248
TFEC	4	0.61002	0.75307	1	13684	1	0.7448	0.1088	0.11069	1	1988	1	0.7448
NSF	4	0.062175	0.17434	0.893038	3720	3	-0.48569	0.10887	0.11076	1	1989	1	-0.48569
ACY3	4	0.46774	0.6456	1	11789	2	0.31524	0.10894	0.11083	1	1990	1	0.31524
KBTBD13	4	0.11548	0.26049	0.950301	5231	3	-0.83754	0.10899	0.11087	1	1991	1	-0.83754
B4GALT4	4	0.18816	0.36837	0.993484	7073	3	-0.41976	0.10904	0.11092	1	1992	1	-0.41976
LLGL2	4	0.99921	0.99921	1	18918	0	1.6136	0.10909	0.11096	1	1993	1	1.6136
MICU1	4	0.063221	0.17633	0.897315	3746	3	-0.48328	0.10916	0.11103	1	1994	1	-0.48328
FANCM	4	0.52179	0.68601	1	12496	2	-0.084087	0.10916	0.11103	1	1995	1	-0.084087
DEFB103A	4	0.95449	0.95451	1	17514	0	0.8486	0.10928	0.11115	1	1996	1	0.8486
SIPA1L2	4	0.23548	0.43381	1	8229	3	-0.24371	0.10937	0.11125	1	1997	1	-0.24371
HS3ST2	4	0.13345	0.28802	0.966525	5685	3	-0.37211	0.10942	0.11129	1	1998	1	-0.37211
BRCA1	4	0.3662	0.57191	1	10554	2	0.30368	0.10956	0.11142	1	1999	1	0.30368
[truncated: 17,114 more rows]
