# Supplementary material for: Discovery of a molecular glue promoting CDK12-DDB1 interaction to trigger cyclin K degradation
Source: eLife. 2020 Aug 17;9:e59994. doi: 10.7554/eLife.59994 (PMC7462607; doi:10.7554/eLife.59994)
Supplement: Figure 1—source data 3. [file elife-59994-fig1-data3.xlsx]

## Sheet: Figure 1D source data
	CellTiter-Glo (ATP)
HQ461(M)	sgNTC			sgDDB1-1			sgRBX1-1			sgUBE2G1-1
5e-05	18410	24360	23900	103060	118120	131920	43060	31790	35930	35610	27850	21460
2.88e-05	34040	27340	27270	140690	160640	181970	38320	46920	44850	51820	43500	48750
1.66e-05	38070	34910	30330	196490	202930	200990	81860	86760	113990	126240	124330	132990
9.59e-06	56360	65220	54850	213960	224500	219010	184620	170410	172700	178340	184900	176380
5.52e-06	42290	48830	43170	232360	203470	233720	177130	197980	185570	257420	270700	272620
3.2e-06	98150	105930	109160	230490	229330	234610	248470	240890	267160	288730	279130	276700
1.84e-06	177290	247760	214770	260200	241370	247600	225540	237470	230500	297250	326340	338010
1.04e-06	250120	267660	292550	266440	262730	269540	306380	286480	313050	312980	335750	320370
6.08e-07	260230	280040	269860	264740	257780	224550	295780	267950	240730	297850	310080	327760
3.52e-07	289350	289810	317840	250370	237750	246820	292190	292940	303380	341410	309550	308880
2.04e-07	291450	300990	265430	317680	266950	274210	262410	264720	241220	303360	350750	286460
1.16e-07	358110	293700	340660	267930	251180	224010	288560	290760	286800	299870	310810	340290
6.8e-08	322880	295000	291440	250520	230710	232990	297310	267380	272530	296160	325630	360740
0	412410	326870	290070	241730	256830	287650	250770	271890	287660	332890	369080	321350
Figure 1-Source Data 3. Measurement of the HQ461 IC50 on the viability of A549 cells expressing non-targeting control or sgRNAs targeting DDB1, RBX1, or UBE2G1 (Source data for Figure 1D).
