# Supplementary material for: Discovery of a molecular glue promoting CDK12-DDB1 interaction to trigger cyclin K degradation
Source: eLife. 2020 Aug 17;9:e59994. doi: 10.7554/eLife.59994 (PMC7462607; doi:10.7554/eLife.59994)
Supplement: Figure 2—source data 1. [file elife-59994-fig2-data1.xlsx]

## Sheet: Figure 2B source data
	CellTiter-Glo (ATP)
0461 (M)	2R		5R		6R		8R		9R		Parental
4.99888e-05	336050	215010
4.81668e-05	462330	189480
4.64234e-05			269210	210960
4.47587e-05			178840	185920
4.31729e-05					278830	179650
4.15863e-05					212590	246930
4.00787e-05							298050	276140
3.86501e-05							375630	148750
3.72209e-05									22740	43970
3.58708e-05									23830	46680
3.45999e-05
3.33285e-05
3.21364e-05											122490	116460
3.09439e-05											96830	121990
2.98307e-05	380430	316510
2.87969e-05	418620	384180
2.77628e-05			421400	366190
2.67284e-05			402240	357240
2.57734e-05					314810	296570
2.48182e-05					327830	270480
2.39426e-05							409850	403510
2.30667e-05							427880	390970
2.22704e-05									30190	50040
2.13941e-05									36800	65580
2.06772e-05
1.98804e-05
1.91632e-05											303300	182560
1.85257e-05											147560	197570
1.78082e-05	650900	675880
1.71705e-05	742920	664400
1.65326e-05			713930	686510
1.59745e-05			708690	643890
1.54163e-05					808740	730030
1.48579e-05					838610	815000
1.42995e-05							543300	1001430
1.37411e-05							1080240	960490
1.32624e-05									200620	144390
1.27836e-05									142710	226430
1.23048e-05
1.19058e-05
1.14269e-05											301440	281630
1.10278e-05											278030	271600
1.06287e-05	1498630	1514450
1.02295e-05	1310000	1272100
9.91008e-06			1440590	1164610
9.51048e-06			1117340	1313210
9.1908e-06					1198530	1182010
8.87112e-06					1165440	1236540
8.55144e-06							1369090	1249630
8.23176e-06							1234290	1437570
7.91208e-06									216270	290590
7.67232e-06									266280	275480
7.35264e-06
7.11288e-06
6.87312e-06											608950	597540
6.55344e-06											524350	684360
6.31368e-06	1534560	1489790
6.15384e-06	1408980	1509150
5.91408e-06			1338620	1480610
5.67432e-06			1357660	1640070
5.51448e-06					1263350	1347060
5.27472e-06					1305120	1371820
5.11488e-06							1451770	1341280
4.87512e-06							1407710	1534610
4.71528e-06									322690	328150
4.55544e-06									269430	336980
4.3956e-06
4.23576e-06
4.07592e-06											1169800	1069150
3.91608e-06											1254710	1389040
3.75624e-06	1682120	1708250
3.67632e-06	1493850	1636720
3.51648e-06			1461610	1512280
3.35664e-06			1494280	1457670
3.27672e-06					1566340	1598420
3.11688e-06					1419310	1541050
3.03696e-06							1423900	1575200
2.95704e-06							1499040	1452360
2.7972e-06									301420	330740
2.71728e-06									303370	321340
2.63736e-06
2.55744e-06
2.47752e-06											1664170	1701280
2.31768e-06											1895050	1959270
2.23776e-06	1738580	1671390
2.15784e-06	1586300	1614780
2.07792e-06			1503750	1348390
1.998e-06			1528690	1518900
1.91808e-06					1341710	1589080
1.91808e-06					1449490	1389260
1.83816e-06							1363610	1496470
1.75824e-06							1425030	1380020
1.67832e-06									300590	269810
1.5984e-06									322400	295150
1.5984e-06
1.51848e-06
1.43856e-06											1760070	1771510
1.43856e-06											2142620	2071580
1.35864e-06	1872210	1722750
1.27872e-06	1678350	1796830
1.27872e-06			1465580	1501990
1.1988e-06			1403530	1716890
1.1988e-06					1351570	1551240
1.11888e-06					1615640	1447780
1.11888e-06							1505300	1630060
1.03896e-06							1501160	1582790
1.03896e-06									333120	288440
9.5904e-07									355980	277130
9.5904e-07
8.7912e-07
8.7912e-07											1846630	1843970
7.992e-07	1710930	1764880
7.992e-07	1656690	1653560
7.992e-07											2176200	1849730
7.1928e-07			1561960	1537910
7.1928e-07			1416070	1567400
6.95304e-07					1605240	1528830
6.71328e-07					1356140	1559650
6.47352e-07							1551610	1601630
6.23376e-07							1445690	1633120
5.994e-07									324000	335950
5.7942e-07									382800	315200
5.5944e-07
5.3946e-07
5.1948e-07											1684770	1786160
4.995e-07											1925240	2156280
0	1781150	1824190	1453340	1448480	1401100	1735980	1511880	1689120	349990	313960	1849330	1899070
0	1670990	1813440	1451320	1655510	1478820	1570350	1642020	1809510	300060	331260	2238340	2149020
Figure 2-Source Data 1. Measurement of the HQ461 IC50 on the viability of parental HCT-116 and five HQ461-resistant HCT-116 clones (Source data for Figure 2B).
