# Supplementary material for: Discovery of a molecular glue promoting CDK12-DDB1 interaction to trigger cyclin K degradation
Source: eLife. 2020 Aug 17;9:e59994. doi: 10.7554/eLife.59994 (PMC7462607; doi:10.7554/eLife.59994)
Supplement: Figure 2—source data 2. [file elife-59994-fig2-data2.xlsx]

## Sheet: Filtered WES results
CHROM	POS	REF	ALT	ANN[0].EFFECT	ANN[0].IMPACT	ANN[0].GENE	FILTER	STR	AD|AWT	AD|BMUT	AF|AWT	AF|BMUT
chr17	39492834	G	A	NON_SYNONYMOUS_CODING	MODERATE	CDK12	PASS	.	109,0	57,24	0.009019	0.295
chr11	70338440	T	C	NON_SYNONYMOUS_CODING	MODERATE	PPFIA1	PASS	.	41,1	44,14	0.045	0.249
chr11	67611952	G	A	NON_SYNONYMOUS_CODING	MODERATE	NDUFV1	PASS	.	339,0	277,93	0.002894	0.246
chr11	46347688	C	A	NON_SYNONYMOUS_CODING	MODERATE	DGKZ	PASS	.	19,0	21,6	0.047	0.24
chr16	57565248	C	A	NON_SYNONYMOUS_CODING	MODERATE	ADGRG5	PASS	.	37,0	31,9	0.025	0.238
chr1	22005790	C	T	NON_SYNONYMOUS_CODING	MODERATE	CELA3A	PASS	.	16,0	19,5	0.054	0.23
chr19	15244452	T	C	NON_SYNONYMOUS_CODING	MODERATE	BRD4	PASS	.	21,0	30,8	0.043	0.225
chr7	128906293	G	A	NON_SYNONYMOUS_CODING	MODERATE	KCP	PASS	.	53,0	34,9	0.018	0.222
chr11	46347717	G	A	NON_SYNONYMOUS_CODING	MODERATE	DGKZ	PASS	.	34,0	29,8	0.027	0.222
chr7	98993679	C	T	NON_SYNONYMOUS_CODING	MODERATE	TRRAP	PASS	.	234,0	191,54	0.004207	0.22
chr10	132836147	A	G	NON_SYNONYMOUS_CODING	MODERATE	CFAP46	PASS	.	48,0	42,12	0.02	0.219
chr1	186087278	A	G	NON_SYNONYMOUS_CODING	MODERATE	HMCN1	PASS	.	109,0	125,35	0.008914	0.218
chr1	201206340	T	C	NON_SYNONYMOUS_CODING	MODERATE	IGFN1	PASS	.	240,0	190,52	0.004097	0.216
chr1	215235108	C	T	NON_SYNONYMOUS_CODING	MODERATE	KCNK2	PASS	.	112,0	107,29	0.008687	0.216
chr2	10603125	G	A	NON_SYNONYMOUS_CODING	MODERATE	NOL10	PASS	.	48,1	42,11	0.039	0.216
chr12	12813517	G	A	SPLICE_SITE_DONOR	HIGH	DDX47	PASS	.	118,0	95,26	0.00828	0.216
chr19	14097868	C	T	NON_SYNONYMOUS_CODING	MODERATE	PRKACA	PASS	.	270,1	237,63	0.007174	0.211
chr20	25685594	T	C	NON_SYNONYMOUS_CODING	MODERATE	ZNF337	PASS	.	132,0	100,25	0.007436	0.204
chr1	234429299	C	T	NON_SYNONYMOUS_CODING	MODERATE	TARBP1	PASS	.	115,0	89,22	0.0085	0.203
chr7	6466100	C	T	NON_SYNONYMOUS_CODING	MODERATE	KDELR2	PASS	.	121,2	106,26	0.024	0.201
chr7	128906285	T	C	NON_SYNONYMOUS_CODING	MODERATE	KCP	PASS	.	56,0	39,9	0.017	0.2
chr10	44375958	G	A	NON_SYNONYMOUS_CODING	MODERATE	CXCL12	PASS	.	35,0	39,9	0.026	0.2
chr9	12704559	C	T	NON_SYNONYMOUS_CODING	MODERATE	TYRP1	PASS	.	28,0	23,5	0.033	0.199
chr13	102747413	T	C	NON_SYNONYMOUS_CODING	MODERATE	CCDC168	PASS	.	91,1	92,22	0.02	0.198
chr22	29512074	G	A	NON_SYNONYMOUS_CODING	MODERATE	THOC5	PASS	.	131,0	114,28	0.007537	0.196
chr22	19895422	C	T	NON_SYNONYMOUS_CODING	MODERATE	TXNRD2	PASS	.	274,0	180,43	0.003612	0.194
chr5	151136264	G	T	PROTEIN_STRUCTURAL_INTERACTION_LOCUS	HIGH	ANXA6	PASS	.	219,3	189,45	0.018	0.193
chr22	50170803	A	G	NON_SYNONYMOUS_CODING	MODERATE	PANX2	PASS	.	45,0	52,12	0.021	0.191
chr3	112047949	G	A	NON_SYNONYMOUS_CODING	MODERATE	TMPRSS7	PASS	.	194,0	134,30	0.005028	0.186
chr4	87317127	T	C	NON_SYNONYMOUS_CODING	MODERATE	HSD17B13	PASS	.	214,0	170,38	0.004545	0.185
chr1	92704643	C	T	NON_SYNONYMOUS_CODING	MODERATE	EVI5	PASS	.	63,1	80,17	0.03	0.181
chr9	109410371	T	C	NON_SYNONYMOUS_CODING	MODERATE	PTPN3	PASS	.	97,0	75,16	0.01	0.181
chr12	106711482	C	T	NON_SYNONYMOUS_CODING	MODERATE	RFX4	PASS	.	141,1	120,26	0.014	0.181
chr7	11590612	T	C	NON_SYNONYMOUS_CODING	MODERATE	THSD7A	PASS	.	159,2	118,25	0.018	0.179
chr3	149921133	G	A	SPLICE_SITE_ACCEPTOR	HIGH	RNF13	PASS	.	86,0	59,12	0.011	0.178
chr1	62528158	G	A	NON_SYNONYMOUS_CODING	MODERATE	DOCK7	PASS	.	59,0	55,11	0.016	0.176
chr12	428768	G	T	SPLICE_SITE_ACCEPTOR	HIGH	CCDC77	PASS	.	53,0	56,11	0.018	0.174
chr9	101552212	G	A	NON_SYNONYMOUS_CODING	MODERATE	RNF20	PASS	.	85,0	71,14	0.011	0.171
chr10	5374070	G	A	NON_SYNONYMOUS_CODING	MODERATE	UCN3	PASS	.	299,0	257,53	0.003283	0.171
chr16	48546176	C	A	NON_SYNONYMOUS_CODING	MODERATE	N4BP1	PASS	.	111,1	115,23	0.009029	0.168
chr9	8528489	G	A	NON_SYNONYMOUS_CODING	MODERATE	PTPRD	PASS	.	82,1	69,13	0.023	0.167
chr14	73491656	G	A	NON_SYNONYMOUS_CODING	MODERATE	C14orf169	PASS	.	228,0	222,45	0.004299	0.167
chr5	96800995	A	G	NON_SYNONYMOUS_CODING	MODERATE	ERAP1	PASS	.	47,0	31,5	0.02	0.159
chr10	125725426	A	G	NON_SYNONYMOUS_CODING	MODERATE	EDRF1	PASS	.	83,1	77,14	0.023	0.159
chr11	36575328	T	G	NON_SYNONYMOUS_CODING	MODERATE	RAG1	PASS	.	176,0	151,28	0.005587	0.157
chrX	116446763	T	C	NON_SYNONYMOUS_CODING	MODERATE	SLC6A14	PASS	.	34,0	62,11	0.028	0.157
chr9	92719375	A	G	NON_SYNONYMOUS_CODING	MODERATE	BICD2	PASS	.	506,3	443,80	0.007785	0.153
chr1	183940582	C	T	NON_SYNONYMOUS_CODING	MODERATE	COLGALT2	PASS	.	127,0	118,21	0.00771	0.152
chr11	123058299	T	G	NON_SYNONYMOUS_CODING	MODERATE	HSPA8	PASS	.	23,0	32,5	0.039	0.152
chr17	75750824	T	C	PROTEIN_STRUCTURAL_INTERACTION_LOCUS	HIGH	ITGB4	PASS	.	633,7	517,93	0.012	0.152
chr12	2567754	C	T	NON_SYNONYMOUS_CODING	MODERATE	CACNA1C	PASS	.	212,0	219,39	0.004617	0.148
chr12	55365117	A	G	NON_SYNONYMOUS_CODING	MODERATE	OR6C75	PASS	.	68,0	74,12	0.014	0.147
chr6	55874723	C	G	NON_SYNONYMOUS_CODING	MODERATE	BMP5	PASS	.	130,0	129,21	0.007451	0.142
chr7	103307707	A	G	NON_SYNONYMOUS_CODING	MODERATE	PMPCB	PASS	.	101,0	98,16	0.00968	0.142
chr11	5301240	T	C	NON_SYNONYMOUS_CODING	MODERATE	OR51B4	PASS	.	120,0	116,18	0.008121	0.139
chr11	67277297	C	A	NON_SYNONYMOUS_CODING	MODERATE	GRK2	PASS	.	163,0	134,22	0.006012	0.139
chr17	50617929	G	T	NON_SYNONYMOUS_CODING	MODERATE	CACNA1G	PASS	.	161,0	135,21	0.0061	0.136
chr2	134859261	G	A	NON_SYNONYMOUS_CODING	MODERATE	ACMSD	PASS	.	117,0	118,18	0.008415	0.135
chr19	32676697	C	T	NON_SYNONYMOUS_CODING	MODERATE	RGS9BP	PASS	.	322,0	298,43	0.003017	0.127
chr20	37174025	T	A	STOP_GAINED	HIGH	MROH8	PASS	.	161,0	147,21	0.006071	0.123
chr18	14791441	C	A	NON_SYNONYMOUS_CODING	MODERATE	ANKRD30B	PASS	.	55,0	60,8	0.018	0.122
chr10	5393640	G	T	STOP_GAINED	HIGH	TUBAL3	PASS	.	207,1	136,18	0.004848	0.121
chr19	40622434	C	T	NON_SYNONYMOUS_CODING	MODERATE	LTBP4	PASS	.	118,0	126,17	0.008229	0.12
chr19	50518554	T	C	NON_SYNONYMOUS_CODING	MODERATE	LRRC4B	PASS	.	227,0	220,30	0.00434	0.12
chr5	55941495	A	T	NON_SYNONYMOUS_CODING	MODERATE	IL6ST	PASS	.	270,0	188,25	0.003664	0.119
chr4	55094936	C	T	NON_SYNONYMOUS_CODING	MODERATE	KDR	PASS	.	147,0	124,16	0.006636	0.118
chr8	22148258	A	G	NON_SYNONYMOUS_CODING	MODERATE	LGI3	PASS	.	227,1	241,32	0.008462	0.118
chr7	82902681	T	C	NON_SYNONYMOUS_CODING	MODERATE	PCLO	PASS	.	36,0	44,5	0.026	0.117
chr11	16318524	G	A	NON_SYNONYMOUS_CODING	MODERATE	SOX6	PASS	.	208,0	228,30	0.004726	0.117
chr15	70057653	C	T	NON_SYNONYMOUS_CODING	MODERATE	TLE3	PASS	.	41,0	37,4	0.023	0.117
chr16	67285122	C	T	NON_SYNONYMOUS_CODING	MODERATE	PLEKHG4	PASS	.	228,0	200,26	0.004297	0.117
chr20	59992379	T	C	NON_SYNONYMOUS_CODING	MODERATE	CDH26	PASS	.	92,0	74,9	0.011	0.117
chr11	72013160	G	A	NON_SYNONYMOUS_CODING	MODERATE	NUMA1	PASS	.	367,0	294,40	0.002665	0.116
chr7	27110223	C	T	NON_SYNONYMOUS_CODING	MODERATE	HOXA3	PASS	.	123,1	113,14	0.016	0.115
chr4	69849542	C	T	NON_SYNONYMOUS_CODING	MODERATE	SULT1E1	PASS	.	104,1	91,11	0.017	0.114
chr17	41514075	A	G	NON_SYNONYMOUS_CODING	MODERATE	KRT15	PASS	.	135,0	122,15	0.007182	0.114
chr1	23794462	CCA	C	FRAME_SHIFT	HIGH	LYPLA2	PASS	.	323,0	297,38	0.003066	0.113
chr3	45091206	G	A	NON_SYNONYMOUS_CODING	MODERATE	CDCP1	PASS	.	166,0	159,19	0.0059	0.111
chr8	144333717	G	C	NON_SYNONYMOUS_CODING	MODERATE	SCRT1	PASS	.	56,0	55,6	0.016	0.111
chr17	72123969	C	T	NON_SYNONYMOUS_CODING	MODERATE	SOX9	PASS	.	140,1	90,10	0.012	0.108
chr1	109251964	G	A	NON_SYNONYMOUS_CODING	MODERATE	CELSR2	PASS	.	378,0	330,40	0.002604	0.107
chr1	215620412	G	A	NON_SYNONYMOUS_CODING	MODERATE	KCTD3	PASS	.	80,0	87,10	0.012	0.107
chr9	15777687	T	C	NON_SYNONYMOUS_CODING	MODERATE	CCDC171	PASS	.	116,0	88,11	0.008465	0.107
chr22	38992172	T	C	NON_SYNONYMOUS_CODING	MODERATE	APOBEC3B	PASS	.	106,1	114,13	0.018	0.107
chr7	28957847	C	T	NON_SYNONYMOUS_CODING	MODERATE	TRIL	PASS	.	177,0	173,20	0.005535	0.106
chr18	54889223	G	A	SPLICE_SITE_ACCEPTOR	HIGH	RAB27B	PASS	.	102,0	100,11	0.009462	0.105
chr19	6754138	C	T	NON_SYNONYMOUS_CODING	MODERATE	SH2D3A	PASS	.	451,1	437,51	0.003011	0.105
chr17	2697978	C	T	NON_SYNONYMOUS_CODING	MODERATE	CLUH	PASS	.	201,0	182,21	0.004881	0.104
chr1	11212831	CAACTT	C	FRAME_SHIFT	HIGH	MTOR	PASS	.	78,0	51,5	0.012	0.103
chr10	91478223	T	G	NON_SYNONYMOUS_CODING	MODERATE	HECTD2	PASS	.	80,0	112,12	0.012	0.102
chr13	50013115	T	A	NON_SYNONYMOUS_CODING	MODERATE	TRIM13	PASS	.	90,0	69,7	0.011	0.1
chr19	12946001	G	A	NON_SYNONYMOUS_CODING	MODERATE	RAD23A	PASS	.	180,1	164,18	0.011	0.1
chr5	129461740	A	G	NON_SYNONYMOUS_CODING	MODERATE	ADAMTS19	PASS	.	278,0	242,26	0.003549	0.099
chr3	45775783	C	T	NON_SYNONYMOUS_CODING	MODERATE	SLC6A20	PASS	.	253,0	239,26	0.003884	0.098
chr1	93114735	T	C	NON_SYNONYMOUS_CODING	MODERATE	MTF2	PASS	.	47,0	74,7	0.02	0.096
chr4	56656003	T	C	NON_SYNONYMOUS_CODING	MODERATE	HOPX	PASS	.	153,0	134,13	0.006412	0.093
chr4	163473671	G	A	NON_SYNONYMOUS_CODING	MODERATE	TKTL2	PASS	.	138,0	134,13	0.007068	0.093
chr7	124841012	T	C	NON_SYNONYMOUS_CODING	MODERATE	POT1	PASS	.	61,0	57,5	0.016	0.093
chr6	43221758	T	C	NON_SYNONYMOUS_CODING	MODERATE	CUL9	PASS	.	205,1	217,21	0.00956	0.09
chr10	98208776	C	T	NON_SYNONYMOUS_CODING	MODERATE	R3HCC1L	PASS	.	112,0	112,10	0.008797	0.089
chr17	16080429	G	A	STOP_GAINED	HIGH	NCOR1	PASS	.	87,0	89,8	0.011	0.089
chr1	213997884	A	G	NON_SYNONYMOUS_CODING	MODERATE	PROX1	PASS	.	602,0	607,59	0.001627	0.088
chr18	62524263	T	C	NON_SYNONYMOUS_CODING	MODERATE	ZCCHC2	PASS	.	379,0	397,38	0.002616	0.088
chr19	52277486	G	A	NON_SYNONYMOUS_CODING	MODERATE	ZNF766	PASS	.	82,0	91,8	0.012	0.088
chr1	108924106	G	C	NON_SYNONYMOUS_CODING	MODERATE	GPSM2	PASS	.	261,0	213,20	0.003763	0.087
chr9	137156992	G	A	NON_SYNONYMOUS_CODING	MODERATE	GRIN1	PASS	.	315,1	312,30	0.004171	0.087
chr1	18840413	A	G	NON_SYNONYMOUS_CODING	MODERATE	TAS1R2	PASS	.	226,0	210,19	0.004321	0.085
chr9	16215807	T	C	NON_SYNONYMOUS_CODING	MODERATE	C9orf92	PASS	.	85,0	73,6	0.011	0.085
chr11	56122953	A	G	NON_SYNONYMOUS_CODING	MODERATE	OR8H3	PASS	.	207,0	177,16	0.004737	0.085
chr14	23396819	T	C	SPLICE_SITE_ACCEPTOR	HIGH	MYH6	PASS	.	70,0	53,4	0.013	0.085
chr8	76856029	G	T	NON_SYNONYMOUS_CODING	MODERATE	ZFHX4	PASS	.	329,0	279,26	0.003002	0.084
chr17	78892341	TG	T	FRAME_SHIFT	HIGH	CEP295NL	PASS	.	348,0	320,30	0.002815	0.084
chr9	32631798	T	C	NON_SYNONYMOUS_CODING	MODERATE	TAF1L	PASS	.	148,0	118,10	0.006546	0.083
chr20	46122696	G	A	NON_SYNONYMOUS_CODING	MODERATE	CD40	PASS	.	354,0	324,29	0.002788	0.083
chr20	63541344	C	T	NON_SYNONYMOUS_CODING	MODERATE	SRMS	PASS	.	524,1	510,47	0.003704	0.083
chr21	42296333	A	T	NON_SYNONYMOUS_CODING	MODERATE	ABCG1	PASS	.	171,0	163,14	0.005687	0.083
chr17	8313087	T	C	NON_SYNONYMOUS_CODING	MODERATE	ARHGEF15	PASS	.	215,0	166,14	0.004568	0.082
chr21	32759121	G	A	STOP_GAINED	HIGH	PAXBP1	PASS	.	95,0	87,7	0.01	0.082
chr3	42663903	T	C	NON_SYNONYMOUS_CODING	MODERATE	ZBTB47	PASS	.	199,0	213,18	0.004954	0.081
chr11	61739510	C	A	NON_SYNONYMOUS_CODING	MODERATE	DAGLA	PASS	.	235,0	208,18	0.004191	0.081
chr3	27418532	C	A	NON_SYNONYMOUS_CODING	MODERATE	SLC4A7	PASS	.	115,0	113,9	0.008508	0.079
chr6	26638466	T	C	NON_SYNONYMOUS_CODING	MODERATE	ZNF322	PASS	.	171,0	160,13	0.005673	0.079
chr6	111222165	T	C	NON_SYNONYMOUS_CODING	MODERATE	SLC16A10	PASS	.	89,0	102,8	0.011	0.078
chr12	119629797	A	G	NON_SYNONYMOUS_CODING	MODERATE	TMEM233	PASS	.	113,0	127,10	0.008582	0.078
chr15	66564812	G	A	NON_SYNONYMOUS_CODING	MODERATE	LCTL	PASS	.	165,0	184,15	0.005969	0.078
chr6	109444746	G	A	STOP_GAINED	HIGH	MICAL1	PASS	.	207,0	178,14	0.004724	0.077
chr8	127738921	C	T	NON_SYNONYMOUS_CODING	MODERATE	MYC	PASS	.	755,1	752,66	0.002522	0.077
chr9	123090285	G	A	NON_SYNONYMOUS_CODING	MODERATE	RABGAP1	PASS	.	71,0	70,5	0.014	0.077
chr12	98533068	G	T	NON_SYNONYMOUS_CODING	MODERATE	TMPO	PASS	.	152,1	146,12	0.011	0.077
chr6	109979898	G	T	NON_SYNONYMOUS_CODING	MODERATE	GPR6	PASS	.	156,0	167,13	0.006273	0.076
chr17	44378674	A	G	NON_SYNONYMOUS_CODING	MODERATE	ITGA2B	PASS	.	229,0	254,21	0.004306	0.076
chr11	62629853	C	A	NON_SYNONYMOUS_CODING	MODERATE	GANAB	PASS	.	226,1	230,18	0.004408	0.075
chr11	55651558	A	G	NON_SYNONYMOUS_CODING	MODERATE	OR4S2	PASS	.	144,0	135,10	0.006863	0.074
chr17	7798186	C	T	NON_SYNONYMOUS_CODING	MODERATE	DNAH2	PASS	.	164,1	151,12	0.012	0.074
chr20	44051475	C	T	NON_SYNONYMOUS_CODING	MODERATE	TOX2	PASS	.	127,1	140,11	0.007675	0.073
chr1	119997101	T	C	NON_SYNONYMOUS_CODING	MODERATE	NOTCH2	PASS	.	280,0	288,22	0.003518	0.071
chr2	99393099	G	GATGAATTGATCCATGAGT	SPLICE_SITE_DONOR	HIGH	EIF5B	PASS	.	70,0	64,4	0.014	0.071
chr8	144401549	G	A	NON_SYNONYMOUS_CODING	MODERATE	CPSF1	PASS	.	452,0	456,35	0.002173	0.071
chr12	25097006	G	T	NON_SYNONYMOUS_CODING	MODERATE	LRMP	PASS	.	92,0	76,5	0.011	0.071
chr15	72756444	T	C	NON_SYNONYMOUS_CODING	MODERATE	ADPGK	PASS	.	281,0	270,20	0.003513	0.07
chr5	129461602	G	A	NON_SYNONYMOUS_CODING	MODERATE	ADAMTS19	PASS	.	171,0	159,11	0.005761	0.069
chr8	67195490	C	T	NON_SYNONYMOUS_CODING	MODERATE	CSPP1	PASS	.	189,0	183,13	0.005174	0.069
chr17	42405243	G	A	NON_SYNONYMOUS_CODING	MODERATE	PTRF	PASS	.	231,0	216,16	0.004268	0.069
chr12	121033623	G	A	PROTEIN_STRUCTURAL_INTERACTION_LOCUS	HIGH	OASL	PASS	.	198,0	175,12	0.004939	0.068
chr11	4127038	T	C	NON_SYNONYMOUS_CODING	MODERATE	RRM1	PASS	.	110,0	107,7	0.00891	0.067
chr17	10449001	C	T	NON_SYNONYMOUS_CODING	MODERATE	MYH4	PASS	.	119,0	111,7	0.008197	0.066
chr10	70600424	T	C	NON_SYNONYMOUS_CODING	MODERATE	PRF1	PASS	.	328,2	345,24	0.008804	0.065
chr17	58587980	G	T	NON_SYNONYMOUS_CODING	MODERATE	TEX14	PASS	.	163,0	129,8	0.006055	0.064
chr22	31105061	C	T	NON_SYNONYMOUS_CODING	MODERATE	SELM	PASS	.	376,0	310,21	0.002617	0.064
chr1	47280422	T	A	NON_SYNONYMOUS_CODING	MODERATE	STIL	PASS	.	130,0	132,8	0.00745	0.063
chr1	89262736	T	C	NON_SYNONYMOUS_CODING	MODERATE	GBP5	PASS	.	79,0	87,5	0.012	0.063
chr10	68573492	A	G	NON_SYNONYMOUS_CODING	MODERATE	TET1	PASS	.	178,0	174,11	0.005486	0.063
chr12	113093163	G	A	NON_SYNONYMOUS_CODING	MODERATE	DTX1	PASS	.	132,0	132,8	0.007425	0.063
chr2	112022500	A	G	SPLICE_SITE_ACCEPTOR	HIGH	MERTK	PASS	.	163,0	191,12	0.005901	0.062
chr4	173332995	TCTGAAAGGAAGCAACAGAGTTTAATAAACTGAAGGAAAAATCCAAGGAGCAATTTGGGTTATTTTAAACTTAC	T	SPLICE_SITE_ACCEPTOR	HIGH	HMGB2	PASS	.	250,0	217,13	0.003961	0.062
chr20	765534	C	T	NON_SYNONYMOUS_CODING	MODERATE	SLC52A3	PASS	.	168,0	171,11	0.005761	0.061
chr11	55651351	G	T	NON_SYNONYMOUS_CODING	MODERATE	OR4S2	PASS	.	119,1	111,7	0.014	0.06
chr12	69258709	C	T	NON_SYNONYMOUS_CODING	MODERATE	CPSF6	PASS	.	379,0	354,22	0.002567	0.06
chr16	89595449	G	A	NON_SYNONYMOUS_CODING	MODERATE	CPNE7	PASS	.	347,0	403,26	0.002839	0.06
chr5	161336722	T	C	NON_SYNONYMOUS_CODING	MODERATE	GABRB2	PASS	.	106,0	93,5	0.009259	0.059
chr2	101019018	A	G	NON_SYNONYMOUS_CODING	MODERATE	RPL31	PASS	.	88,0	79,4	0.011	0.058
chr10	288417	G	A	NON_SYNONYMOUS_CODING	MODERATE	DIP2C	PASS	.	75,0	94,5	0.013	0.058
chr3	196228254	C	T	NON_SYNONYMOUS_CODING	MODERATE	SLC51A	PASS	.	102,0	129,7	0.00951	0.057
chr19	14469366	G	A	NON_SYNONYMOUS_CODING	MODERATE	PKN1	PASS	.	287,0	275,16	0.003417	0.057
chr14	57865812	G	A	NON_SYNONYMOUS_CODING	MODERATE	SLC35F4	PASS	.	234,0	284,18	0.004178	0.056
chr4	61733083	G	T	NON_SYNONYMOUS_CODING	MODERATE	ADGRL3	PASS	.	87,1	99,5	0.012	0.055
chr8	26864833	A	G	NON_SYNONYMOUS_CODING	MODERATE	ADRA1A	PASS	.	364,2	408,23	0.005744	0.055
chr10	13329763	C	T	PROTEIN_STRUCTURAL_INTERACTION_LOCUS	HIGH	SEPHS1	PASS	.	154,0	149,8	0.00634	0.055
chr1	154989563	C	T	NON_SYNONYMOUS_CODING	MODERATE	FLAD1	PASS	.	227,0	220,12	0.004344	0.054
chr3	52706188	G	T	NON_SYNONYMOUS_CODING	MODERATE	SPCS1	PASS	.	236,0	241,13	0.004195	0.054
chr19	6421665	C	A	NON_SYNONYMOUS_CODING	MODERATE	KHSRP	PASS	.	325,0	393,22	0.003025	0.054
chr8	41650282	G	A	NON_SYNONYMOUS_CODING	MODERATE	NKX6-3	PASS	.	338,0	336,18	0.002919	0.053
chr15	90228513	C	T	NON_SYNONYMOUS_CODING	MODERATE	SEMA4B	PASS	.	291,0	325,18	0.003352	0.053
chr20	35938957	A	C	NON_SYNONYMOUS_CODING	MODERATE	PHF20	PASS	.	470,2	479,27	0.004031	0.053
chr2	172922301	G	A	SPLICE_SITE_DONOR	HIGH	RAPGEF4	PASS	.	90,0	106,5	0.011	0.052
chr9	137543728	T	C	NON_SYNONYMOUS_CODING	MODERATE	PNPLA7	PASS	.	243,0	271,14	0.004036	0.05
chr11	61302583	T	C	PROTEIN_STRUCTURAL_INTERACTION_LOCUS	HIGH	DDB1	PASS	.	137,0	128,6	0.007185	0.05
chr20	58910081	G	GCTACTCCCGAGCCCGGAGAGGACCCACGCGTGACCCGGGCCAAGTACTTCATTCGA	SPLICE_SITE_DONOR	HIGH	GNAS	PASS	.	134,0	128,6	0.007321	0.05
chr13	37104949	A	G	NON_SYNONYMOUS_CODING	MODERATE	CSNK1A1L	PASS	.	194,0	155,8	0.005037	0.049
chr7	25124031	C	A	NON_SYNONYMOUS_CODING	MODERATE	CYCS	PASS	.	113,0	101,4	0.008608	0.047
chr11	85725199	C	T	NON_SYNONYMOUS_CODING	MODERATE	SYTL2	PASS	.	177,0	175,8	0.005476	0.047
chr5	141095425	T	C	NON_SYNONYMOUS_CODING	MODERATE	PCDHB2	PASS	.	227,0	220,10	0.004341	0.046
chr8	124023543	G	T	NON_SYNONYMOUS_CODING	MODERATE	FER1L6	PASS	.	209,0	260,12	0.004681	0.046
chr1	180080577	A	G	NON_SYNONYMOUS_CODING	MODERATE	CEP350	PASS	.	120,0	133,5	0.008109	0.042
chr7	74106174	G	A	NON_SYNONYMOUS_CODING	MODERATE	LIMK1	PASS	.	375,0	379,16	0.002617	0.042
chr17	45244009	C	T	NON_SYNONYMOUS_CODING	MODERATE	FMNL1	PASS	.	265,0	264,11	0.003711	0.042
chr11	117387217	C	A	NON_SYNONYMOUS_CODING	MODERATE	CEP164	PASS	.	166,0	163,6	0.005889	0.04
chr17	18960603	T	C	NON_SYNONYMOUS_CODING	MODERATE	SLC5A10	PASS	.	265,0	268,11	0.003686	0.039
chr12	48776525	C	T	NON_SYNONYMOUS_CODING	MODERATE	ADCY6	PASS	.	276,0	244,9	0.003564	0.038
chr15	59208809	C	T	NON_SYNONYMOUS_CODING	MODERATE	MYO1E	PASS	.	176,0	177,7	0.00555	0.038
chr1	182602095	C	T	PROTEIN_PROTEIN_INTERACTION_LOCUS	HIGH	RGS16	PASS	.	226,0	234,8	0.004354	0.036
chr1	33479475	G	A	NON_SYNONYMOUS_CODING	MODERATE	ZSCAN20	PASS	.	247,0	267,9	0.003956	0.034
chr1	90716915	G	T	NON_SYNONYMOUS_CODING	MODERATE	BARHL2	PASS	.	233,0	220,7	0.004217	0.033
chr19	9093630	CA	AG	NON_SYNONYMOUS_CODING	MODERATE	OR1M1	PASS	.	385,0	379,12	0.002548	0.032
chr3	138301702	C	T	NON_SYNONYMOUS_CODING	MODERATE	NME9	PASS	.	184,0	163,4	0.00534	0.03
chr15	75649517	G	A	NON_SYNONYMOUS_CODING	MODERATE	SNX33	PASS	.	220,0	221,6	0.004463	0.03
chr2	219570364	C	T	NON_SYNONYMOUS_CODING	MODERATE	OBSL1	PASS	.	679,3	795,19	0.00414	0.022
chr2	159179010	A	C	NON_SYNONYMOUS_CODING	MODERATE	TANC1	PASS	.	408,2	395,8	0.002474	0.021
Figure 2-Source Data 2. Exome-sequencing of HQ461S versus HQ461R HCT-116 (Source data for Figure 2C).

## Sheet: Origin results
CHROM	POS	REF	ALT	ANN[0].EFFECT	ANN[0].IMPACT	ANN[0].GENE	FILTER	STR	AD|AWT	AD|BMUT	AF|AWT	AF|BMUT
chr1	14752	G	A	DOWNSTREAM	MODIFIER	DDX11L1	map_qual;weak_evidence	.	54,0	44,4	0.018	0.099
chr1	15738	A	AT	DOWNSTREAM	MODIFIER	DDX11L1	map_qual;weak_evidence	.	18,0	13,2	0.05	0.177
chr1	16996	T	C	DOWNSTREAM	MODIFIER	DDX11L1	map_qual;normal_artifact;strand_bias;weak_evidence	.	136,8	112,6	0.059	0.056
chr1	17519	G	T	UPSTREAM	MODIFIER	MIR6859-1	clustered_events;normal_artifact	.	218,21	232,21	0.09	0.083
chr1	17538	C	A	UPSTREAM	MODIFIER	MIR6859-1	clustered_events;normal_artifact	.	211,7	225,12	0.032	0.05
chr1	17594	C	T	UPSTREAM	MODIFIER	MIR6859-1	clustered_events;normal_artifact	.	161,15	149,21	0.082	0.121
chr1	17614	G	A	UPSTREAM	MODIFIER	MIR6859-1	clustered_events;normal_artifact	.	138,12	135,19	0.077	0.124
chr1	19248	C	T	UPSTREAM	MODIFIER	MIR6859-1	map_qual;weak_evidence	.	13,0	15,3	0.067	0.199
chr1	137886	A	T	UPSTREAM	MODIFIER	RP11-34P13.7	normal_artifact	.	74,3	85,8	0.049	0.093
chr1	182469	T	A	UTR_5_PRIME	MODIFIER	FO538757.2	map_qual;normal_artifact	.	34,2	35,6	0.077	0.162
chr1	182572	C	T	START_GAINED	LOW	FO538757.2	map_qual;normal_artifact	.	142,10	151,9	0.07	0.056
chr1	182597	G	A	START_GAINED	LOW	FO538757.2	map_qual;normal_artifact	.	210,13	231,11	0.057	0.048
chr1	182785	A	G	DOWNSTREAM	MODIFIER	FO538757.1	map_qual;normal_artifact;strand_bias	.	87,5	88,11	0.063	0.118
chr1	183078	G	A	DOWNSTREAM	MODIFIER	FO538757.1	map_qual;normal_artifact	.	88,7	73,9	0.082	0.119
chr1	183129	C	T	SYNONYMOUS_CODING	LOW	FO538757.2	map_qual;normal_artifact	.	192,18	181,20	0.086	0.1
chr1	183598	C	G	DOWNSTREAM	MODIFIER	FO538757.1	clustered_events;normal_artifact;strand_bias	.	382,32	400,19	0.077	0.047
chr1	183662	G	C	DOWNSTREAM	MODIFIER	FO538757.1	clustered_events;normal_artifact	.	886,74	865,74	0.077	0.079
chr1	183697	G	A	DOWNSTREAM	MODIFIER	FO538757.1	clustered_events;normal_artifact	.	1295108	1259104	0.075	0.075
chr1	183733	C	T	DOWNSTREAM	MODIFIER	FO538757.1	clustered_events;normal_artifact	.	1552116	1553127	0.069	0.074
chr1	184057	G	A	NON_SYNONYMOUS_CODING	MODERATE	FO538757.2	normal_artifact;strand_bias	.	959,22	1006,29	0.023	0.027
chr1	185262	C	A	SYNONYMOUS_CODING	LOW	FO538757.1	clustered_events;map_qual;normal_artifact	.	121,10	108,11	0.081	0.098
chr1	185313	G	A	SYNONYMOUS_CODING	LOW	FO538757.1	clustered_events;map_qual;normal_artifact	.	148,14	128,14	0.089	0.102
chr1	185336	C	T	NON_SYNONYMOUS_CODING	MODERATE	FO538757.1	clustered_events;map_qual;normal_artifact	.	128,11	116,14	0.083	0.112
chr1	187490	C	CA	FRAME_SHIFT	HIGH	FO538757.1	normal_artifact	STR	240,18	251,19	0.061	0.054
chr1	188138	G	A	SYNONYMOUS_CODING	LOW	FO538757.1	map_qual;normal_artifact;weak_evidence	.	103,13	120,5	0.109	0.045
chr1	188252	G	T	NON_SYNONYMOUS_CODING	MODERATE	FO538757.1	clustered_events;map_qual;normal_artifact	.	192,9	183,10	0.047	0.05
chr1	188277	C	T	UPSTREAM	MODIFIER	MIR6859-2	clustered_events;map_qual;normal_artifact;weak_evidence	.	184,6	172,6	0.035	0.037
chr1	188329	T	C	UPSTREAM	MODIFIER	MIR6859-2	clustered_events;map_qual;normal_artifact;strand_bias	.	125,9	110,8	0.072	0.074
chr1	189695	G	A	UPSTREAM	MODIFIER	MIR6859-2	map_qual;normal_artifact;weak_evidence	.	23,2	24,4	0.108	0.165
chr1	736890	C	T	INTRON	MODIFIER	RP11-206L10.2	weak_evidence	.	12,0	11,2	0.071	0.199
chr1	873711	A	G	UPSTREAM	MODIFIER	FAM41C	clustered_events;map_qual;normal_artifact;strand_bias;weak_evidence	.	303,9	347,6	0.028	0.019
chr1	873743	G	A	UPSTREAM	MODIFIER	FAM41C	clustered_events;haplotype;map_qual;normal_artifact;strand_bias	.	276,14	330,10	0.051	0.031
chr1	873755	C	T	UPSTREAM	MODIFIER	FAM41C	clustered_events;haplotype;map_qual;normal_artifact;strand_bias	.	265,13	318,12	0.05	0.038
chr1	873939	C	T	UPSTREAM	MODIFIER	FAM41C	normal_artifact;strand_bias	.	233,19	255,17	0.078	0.062
chr1	873966	CA	AG	UPSTREAM	MODIFIER	FAM41C	normal_artifact;strand_bias	.	223,5	261,7	0.026	0.03
chr1	942724	GC	G	DOWNSTREAM	MODIFIER	NOC2L	normal_artifact	STR	91,8	63,13	0.077	0.171
chr1	960704	G	A	NON_SYNONYMOUS_CODING	MODERATE	KLHL17	normal_artifact	.	56,5	60,8	0.094	0.126
chr1	973370	G	A	DOWNSTREAM	MODIFIER	PERM1	normal_artifact	.	99,5	96,10	0.056	0.101
chr1	979987	G	A	NON_SYNONYMOUS_CODING	MODERATE	PERM1	normal_artifact	.	409,28	385,48	0.056	0.103
chr1	1086138	C	T	UPSTREAM	MODIFIER	C1orf159	normal_artifact;weak_evidence	.	22,1	18,2	0.08	0.136
chr1	1142929	T	TC	EXON	MODIFIER	LINC01342	normal_artifact;slippage	STR	296,32	300,65	0.087	0.161
chr1	1180842	CG	C	UPSTREAM	MODIFIER	TTLL10-AS1	normal_artifact;slippage	STR	142,13	132,15	0.069	0.097
chr1	1312209	C	G	UPSTREAM	MODIFIER	ACAP3	base_qual;normal_artifact	.	51,4	45,5	0.049	0.094
chr1	1342120	G	A	SYNONYMOUS_CODING	LOW	DVL1	PASS	.	175,0	164,17	0.005631	0.094
chr1	1353771	C	T	UPSTREAM	MODIFIER	DVL1	normal_artifact	.	121,4	108,17	0.039	0.138
chr1	1354134	C	T	UPSTREAM	MODIFIER	DVL1	normal_artifact	.	237,10	282,17	0.044	0.057
chr1	1361437	T	TG,TGG	UTR_5_PRIME	MODIFIER	MXRA8	germline;normal_artifact;weak_evidence	.	12,6,0	19,3,2	0.333,0.043	0.147,0.110
chr1	1387577	C	T	NON_SYNONYMOUS_CODING	MODERATE	CCNL2	normal_artifact	.	175,16	244,28	0.087	0.103
chr1	1392835	CA	C	UPSTREAM	MODIFIER	CCNL2	normal_artifact	STR	105,11	122,13	0.083	0.082
chr1	1421007	TG	T	UTR_5_PRIME	MODIFIER	ANKRD65	normal_artifact	STR	211,3	208,12	0.018	0.052
chr1	1439598	G	T	SYNONYMOUS_CODING	LOW	VWA1	PASS	.	19,0	30,7	0.046	0.195
chr1	1457000	G	A	INTRON	MODIFIER	ATAD3C	PASS	.	56,0	70,6	0.017	0.089
chr1	1459411	T	C	UPSTREAM	MODIFIER	ATAD3C	normal_artifact;weak_evidence	.	44,3	56,4	0.068	0.08
chr1	1462685	G	A	NON_SYNONYMOUS_CODING	MODERATE	ATAD3C	normal_artifact	.	269,3	235,9	0.014	0.039
chr1	1483127	TA	T	UPSTREAM	MODIFIER	ATAD3B	normal_artifact;slippage;weak_evidence	STR	24,3	23,4	0.108	0.167
chr1	1485413	A	G	DOWNSTREAM	MODIFIER	ATAD3B	normal_artifact	.	45,1	40,5	0.042	0.128
chr1	1517419	G	A	UPSTREAM	MODIFIER	ATAD3A	normal_artifact	.	33,1	23,6	0.054	0.226
chr1	1564739	C	T	SYNONYMOUS_CODING	LOW	SSU72	normal_artifact	.	121,10	148,23	0.077	0.139
chr1	1625471	AG	CC	UPSTREAM	MODIFIER	MIB2	base_qual;clustered_events;normal_artifact;strand_bias;weak_evidence	.	102,6	99,15	0.063	0.135
chr1	1625476	T	C	UPSTREAM	MODIFIER	MIB2	clustered_events;haplotype;normal_artifact;strand_bias	.	107,5	102,12	0.051	0.105
chr1	1625479	G	C,GC	UPSTREAM	MODIFIER	MIB2	clustered_events;germline;multiallelic;normal_artifact	.	62,4,46	54,10,52	0.039,0.412	0.083,0.447
chr1	1625485	T	C	UPSTREAM	MODIFIER	MIB2	clustered_events;haplotype;normal_artifact;strand_bias	.	123,1	130,7	0.016	0.058
chr1	1626770	A	C	UPSTREAM	MODIFIER	MIB2	base_qual;normal_artifact;strand_bias	.	185,11	239,14	0.027	0.035
chr1	1634380	T	G	DOWNSTREAM	MODIFIER	MIB2	weak_evidence	.	38,0	28,4	0.025	0.136
chr1	1645363	G	GT	INTRON	MODIFIER	CDK11B	normal_artifact;slippage	STR	831,76	955,66	0.051	0.032
chr1	1647642	C	T	INTRON	MODIFIER	CDK11B	normal_artifact;strand_bias	.	251,16	245,18	0.063	0.069
chr1	1647727	A	G	INTRON	MODIFIER	CDK11B	normal_artifact;weak_evidence	.	190,1	169,4	0.01	0.027
chr1	1668612	C	G	UPSTREAM	MODIFIER	RP11-345P4.6	normal_artifact;weak_evidence	.	96,3	91,3	0.039	0.032
chr1	1668622	G	A	UPSTREAM	MODIFIER	RP11-345P4.6	normal_artifact;weak_evidence	.	89,3	81,3	0.043	0.044
chr1	1707487	G	A	SYNONYMOUS_CODING	LOW	CDK11A	normal_artifact	.	388,13	447,23	0.033	0.049
chr1	1707623	T	C	UPSTREAM	MODIFIER	CDK11A	map_qual;normal_artifact;strand_bias	.	150,13	166,7	0.084	0.045
chr1	1734864	T	C	UPSTREAM	MODIFIER	RP1-283E3.4	map_qual;normal_artifact;strand_bias	.	158,15	131,13	0.088	0.095
chr1	1752908	CCCT	C,CCCTCCT	CODON_INSERTION	MODERATE	NADK	germline;multiallelic;normal_artifact;slippage	STR	150,5,158	159,10,133	0.018,0.504	0.034,0.438
chr1	1757384	TAA	T,TA	UPSTREAM	MODIFIER	NADK	germline;normal_artifact	STR	29,1,53	40,6,64	0.023,0.626	0.053,0.593
chr1	1758959	C	T	UPSTREAM	MODIFIER	NADK	PASS	.	37,0	28,3	0.025	0.121
chr1	1865039	G	T	INTRON	MODIFIER	GNB1	weak_evidence	.	9,0	3,2	0.091	0.428
chr1	1874419	G	C	INTRON	MODIFIER	GNB1	germline;weak_evidence	.	8,0	2,1	0.1	0.4
chr1	1876492	CGA	C	INTRON	MODIFIER	GNB1	germline;slippage	STR	8,0	2,3	0.095	0.571
chr1	1918487	C	A	NON_SYNONYMOUS_CODING	MODERATE	TMEM52	normal_artifact	.	204,13	175,20	0.063	0.105
chr1	2187303	CT	C,CTT	UPSTREAM	MODIFIER	RP11-181G12.2	germline;multiallelic;normal_artifact;slippage	STR	7,11,1	8,13,5	0.556,0.065	0.474,0.203
chr1	2198302	AC	A	UPSTREAM	MODIFIER	FAAP20	normal_artifact	STR	52,2	53,8	0.053	0.133
chr1	2356177	T	C	UPSTREAM	MODIFIER	RP4-740C4.5	germline	.	8,0	4,8	0.1	0.644
chr1	2378817	G	A	UTR_3_PRIME	MODIFIER	MORN1	PASS	.	12,0	11,3	0.071	0.249
chr1	2400835	T	C	UPSTREAM	MODIFIER	RER1	normal_artifact	.	61,2	61,9	0.034	0.138
chr1	2629379	CCAG	C	CODON_DELETION	MODERATE	MMEL1	normal_artifact;slippage	STR	62,3	52,3	0.059	0.07
chr1	2820633	T	TG	INTERGENIC	MODIFIER		weak_evidence	STR	10,0	10,2	0.081	0.213
chr1	3412821	A	C	INTRON	MODIFIER	PRDM16	base_qual;strand_bias	.	159,0	140,27	0.006114	0.092
chr1	3495918	C	CG	FRAME_SHIFT	HIGH	MEGF6	strand_bias;weak_evidence	STR	100,0	120,4	0.009639	0.04
chr1	3508562	A	C	NON_SYNONYMOUS_CODING	MODERATE	MEGF6	base_qual;strand_bias	.	154,0	124,19	0.006377	0.09
chr1	3575039	A	G	INTRON	MODIFIER	MEGF6	weak_evidence	.	8,0	1,1	0.1	0.5
chr1	3781609	GA	G	UPSTREAM	MODIFIER	RN7SL574P	weak_evidence	STR	54,0	51,8	0.018	0.113
chr1	3869564	C	T	INTRON	MODIFIER	DFFB	normal_artifact	.	72,5	71,11	0.075	0.143
chr1	3933507	C	T	INTERGENIC	MODIFIER		weak_evidence	.	11,0	2,2	0.075	0.499
chr1	4711886	TC	T	INTRON	MODIFIER	AJAP1	normal_artifact	STR	233,25	251,23	0.089	0.07
chr1	4712522	GCCA	G	DOWNSTREAM	MODIFIER	AJAP1	normal_artifact;slippage	STR	373,10	347,11	0.028	0.032
chr1	4849332	C	T	INTERGENIC	MODIFIER		weak_evidence	.	9,0	3,2	0.091	0.427
chr1	5247908	G	A	INTERGENIC	MODIFIER		germline	.	8,0	3,4	0.101	0.556
chr1	5813674	GGAGGAGGAGGAGGAT	G	INTERGENIC	MODIFIER		weak_evidence	.	29,0	19,2	0.031	0.129
chr1	6087235	T	C	DOWNSTREAM	MODIFIER	KCNAB2	PASS	.	17,0	14,3	0.053	0.21
chr1	6113423	CAA	C,CA,CAAA	INTRON	MODIFIER	CHD5	germline;multiallelic;normal_artifact	STR	30,5,38,3	28,9,32,17	0.065,0.485,0.036	0.105,0.378,0.190
chr1	6143808	A	C	INTRON	MODIFIER	CHD5	base_qual;normal_artifact;strand_bias;weak_evidence	.	56,3	53,3	0.041	0.069
chr1	6144029	G	C	SYNONYMOUS_CODING	LOW	CHD5	normal_artifact	.	202,10	194,20	0.049	0.092
chr1	6422207	G	A	UPSTREAM	MODIFIER	HES2	PASS	.	9,0	3,6	0.091	0.625
chr1	6462546	G	A	DOWNSTREAM	MODIFIER	ESPN	normal_artifact	.	267,21	282,34	0.075	0.109
chr1	6469122	TTCC	T	CODON_CHANGE_PLUS_CODON_DELETION	MODERATE	PLEKHG5	normal_artifact;slippage	STR	170,9	175,5	0.05	0.032
chr1	6785517	CGAG	C	UPSTREAM	MODIFIER	RP11-312B8.1	slippage;weak_evidence	STR	31,0	36,3	0.03	0.096
chr1	6806822	A	T	INTRON	MODIFIER	CAMTA1	PASS	.	8,0	6,5	0.101	0.461
chr1	7322949	C	CCCTGG	INTRON	MODIFIER	CAMTA1	germline;weak_evidence	.	8,0	1,1	0.1	0.5
chr1	7467769	TCTTC	T	INTRON	MODIFIER	CAMTA1	normal_artifact;slippage;weak_evidence	STR	236,1	220,5	0.008255	0.026
chr1	7771440	G	C	UPSTREAM	MODIFIER	VAMP3	normal_artifact	.	132,11	150,13	0.078	0.082
chr1	8324509	A	C	SYNONYMOUS_CODING	LOW	SLC45A1	base_qual;normal_artifact;strand_bias;weak_evidence	.	224,20	253,25	0.052	0.054
chr1	8325425	GA	G	UPSTREAM	MODIFIER	SLC45A1	normal_artifact;slippage	STR	83,14	90,31	0.117	0.23
chr1	8358719	G	A	SYNONYMOUS_CODING	LOW	RERE	normal_artifact	.	222,14	212,26	0.06	0.111
chr1	8843055	G	A	INTERGENIC	MODIFIER		weak_evidence	.	9,0	3,2	0.088	0.428
chr1	9014989	C	A	INTRON	MODIFIER	SLC2A7	normal_artifact;weak_evidence	.	30,2	28,5	0.063	0.12
chr1	9037599	G	A	NON_SYNONYMOUS_CODING	MODERATE	SLC2A5	normal_artifact	.	100,5	97,5	0.055	0.056
chr1	9611908	C	G	DOWNSTREAM	MODIFIER	TMEM201	base_qual;normal_artifact;strand_bias	.	81,4	96,11	0.056	0.088
chr1	9611912	A	T	DOWNSTREAM	MODIFIER	TMEM201	base_qual;normal_artifact;strand_bias;weak_evidence	.	77,4	98,9	0.05	0.069
chr1	9715830	AG	CC	UPSTREAM	MODIFIER	PIK3CD	clustered_events;haplotype;normal_artifact;strand_bias	.	291,15	339,17	0.047	0.044
chr1	9715835	T	C	UPSTREAM	MODIFIER	PIK3CD	base_qual;clustered_events;haplotype;normal_artifact;strand_bias	.	288,14	346,15	0.045	0.041
chr1	9715840	A	C	UPSTREAM	MODIFIER	PIK3CD	clustered_events;normal_artifact;strand_bias	.	280,11	336,17	0.036	0.042
chr1	9715845	G	C	UPSTREAM	MODIFIER	PIK3CD	clustered_events;haplotype;normal_artifact;strand_bias	.	293,5	357,7	0.017	0.022
chr1	9715846	CAGG	C	FRAME_SHIFT	HIGH	PIK3CD	clustered_events;haplotype;normal_artifact;strand_bias;weak_evidence	.	293,5	361,5	0.017	0.016
chr1	9749900	GT	G	FRAME_SHIFT	HIGH	CLSTN1	normal_artifact;weak_evidence	STR	86,8	93,7	0.088	0.06
chr1	10015705	TA	T	INTRON	MODIFIER	RBP7	weak_evidence	STR	58,1	61,4	0.018	0.075
chr1	10117505	C	T	NON_SYNONYMOUS_CODING	MODERATE	UBE4B	normal_artifact	.	102,8	109,13	0.079	0.112
chr1	10295463	G	A	UPSTREAM	MODIFIER	RNU6-37P	normal_artifact	.	37,1	38,3	0.049	0.093
chr1	10400659	AT	A	DOWNSTREAM	MODIFIER	PGD	normal_artifact;slippage	STR	61,6	59,6	0.087	0.105
chr1	10500851	A	T	INTRON	MODIFIER	PEX14	weak_evidence	.	8,0	2,2	0.1	0.517
chr1	11037653	G	A	DOWNSTREAM	MODIFIER	MASP2	normal_artifact	.	56,4	68,7	0.079	0.103
chr1	11069680	G	A	SYNONYMOUS_CODING	LOW	EXOSC10	normal_artifact	.	105,4	98,16	0.044	0.143
chr1	11098007	G	A	UPSTREAM	MODIFIER	RP4-635E18.6	normal_artifact	.	76,7	71,10	0.086	0.126
chr1	11109279	G	A	INTRON	MODIFIER	MTOR	normal_artifact	.	101,8	135,10	0.079	0.073
chr1	11167522	G	A	INTRON	MODIFIER	MTOR	normal_artifact	.	68,4	63,5	0.066	0.086
chr17	39492834	G	A	NON_SYNONYMOUS_CODING	MODERATE	CDK12	PASS	.	109,0	57,24	0.009019	0.295
chr1	11311192	GT	G	INTERGENIC	MODIFIER		weak_evidence	STR	8,0	0,2	0.102	0.75
chr1	11315414	A	C	INTERGENIC	MODIFIER		strand_bias	.	23,0	29,5	0.04	0.144
chr1	11519482	C	T	SYNONYMOUS_CODING	LOW	DISP3	normal_artifact	.	375,39	463,28	0.091	0.054
chr1	11680162	AT	A	INTRON	MODIFIER	MAD2L2	PASS	STR	29,0	29,5	0.031	0.166
chr1	11772237	C	T	NON_SYNONYMOUS_CODING	MODERATE	C1orf167	normal_artifact	.	110,9	120,30	0.082	0.201
chr1	11800680	T	G	INTRON	MODIFIER	MTHFR	weak_evidence	.	8,0	11,2	0.1	0.199
chr1	11819639	C	T	INTRON	MODIFIER	CLCN6	normal_artifact	.	61,3	70,5	0.061	0.077
chr1	11838429	C	T	NON_SYNONYMOUS_CODING	MODERATE	CLCN6	normal_artifact	.	396,30	337,40	0.07	0.106
chr1	11846260	C	A	UPSTREAM	MODIFIER	NPPA-AS1_3	PASS	.	23,0	16,4	0.04	0.226
chr1	11858870	TCTG	T	UTR_5_PRIME	MODIFIER	NPPB	normal_artifact;slippage	STR	169,2	187,4	0.017	0.025
chr1	11925545	G	T	SYNONYMOUS_CODING	LOW	KIAA2013	normal_artifact	.	104,9	94,7	0.086	0.077
chr1	11925679	G	A	SYNONYMOUS_CODING	LOW	KIAA2013	normal_artifact	.	80,3	82,4	0.047	0.057
chr1	11947868	T	C	INTRON	MODIFIER	PLOD1	normal_artifact;weak_evidence	.	35,1	39,2	0.052	0.07
chr1	11966278	A	T	NON_SYNONYMOUS_CODING	MODERATE	PLOD1	normal_artifact	.	162,9	144,33	0.056	0.187
chr1	12007167	C	T	NON_SYNONYMOUS_CODING	MODERATE	MFN2	normal_artifact	.	135,12	142,25	0.086	0.153
chr1	12123766	G	A	SYNONYMOUS_CODING	LOW	TNFRSF8	normal_artifact	.	312,23	270,30	0.068	0.097
chr1	12191074	G	A	NON_SYNONYMOUS_CODING	MODERATE	TNFRSF1B	normal_artifact	.	190,16	182,12	0.081	0.065
chr1	12308648	GTT	G,GT,GTTT	UPSTREAM	MODIFIER	VPS13D	germline;multiallelic;normal_artifact	STR	6,14,19,2	1,21,14,2	0.348,0.432,0.047	0.510,0.373,0.070
chr1	12795956	C	G	STOP_GAINED	HIGH	PRAMEF1	haplotype;map_qual;normal_artifact	.	73,1	72,3	0.026	0.052
chr1	12795962	C	T	NON_SYNONYMOUS_CODING	MODERATE	PRAMEF1	haplotype;map_qual;normal_artifact;weak_evidence	.	71,1	69,2	0.027	0.041
chr1	12840318	G	A	EXON	MODIFIER	PRAMEF30P	normal_artifact	.	152,7	155,13	0.049	0.079
chr1	12882503	G	C	INTRON	MODIFIER	PRAMEF4	normal_artifact	.	160,12	159,9	0.074	0.057
chr1	13318534	A	C	NON_SYNONYMOUS_CODING	MODERATE	PRAMEF15	map_qual;weak_evidence	.	172,2	205,6	0.014	0.03
chr1	13319384	C	T	SYNONYMOUS_CODING	LOW	PRAMEF15	normal_artifact;strand_bias	.	318,15	323,18	0.047	0.054
chr1	13342829	T	C	NON_SYNONYMOUS_CODING	MODERATE	PRAMEF14	normal_artifact;strand_bias	.	342,23	330,18	0.065	0.052
chr1	13345313	A	C	START_LOST	HIGH	PRAMEF14	normal_artifact;strand_bias;weak_evidence	.	104,3	98,2	0.037	0.029
chr1	13345332	A	G	UTR_5_PRIME	MODIFIER	PRAMEF14	normal_artifact;strand_bias;weak_evidence	.	80,3	78,2	0.047	0.037
chr1	13592859	A	G	INTRON	MODIFIER	PDPN	weak_evidence	.	8,0	3,2	0.101	0.428
chr1	15109425	T	C	DOWNSTREAM	MODIFIER	TMEM51-AS1	germline;weak_evidence	.	10,0	2,2	0.083	0.499
chr1	15112329	ATGTGTGTGTGTG	A,ATG,ATGTG,ATGTGTGTGTGTGTG	DOWNSTREAM	MODIFIER	TMEM51-AS1	germline;multiallelic;normal_artifact	STR	10,7,4,7,0	4,8,5,12,7	0.227,0.143,0.229,0.030	0.198,0.143,0.338,0.196
chr1	15383998	ATG	A,ATGTG	UTR_3_PRIME	MODIFIER	FHAD1	slippage;weak_evidence	STR	16,0,2	15,2,3	0.040,0.126	0.123,0.166
chr1	15438301	C	A	UPSTREAM	MODIFIER	CTRC	normal_artifact	.	116,7	95,10	0.063	0.103
chr1	15456670	T	C	UPSTREAM	MODIFIER	CELA2A	clustered_events;haplotype;normal_artifact;strand_bias	.	208,3	203,4	0.019	0.024
chr1	15456673	C	G	UPSTREAM	MODIFIER	CELA2A	clustered_events;haplotype;normal_artifact;strand_bias	.	207,3	203,4	0.019	0.024
chr1	15456694	CC	TT	UPSTREAM	MODIFIER	CELA2A	clustered_events;normal_artifact;strand_bias	.	202,5	190,6	0.029	0.035
chr1	15518440	A	G	INTRON	MODIFIER	CASP9	PASS	.	118,0	116,33	0.008255	0.224
chr1	15604908	G	A	UPSTREAM	MODIFIER	RP4-680D5.2	PASS	.	77,0	79,4	0.012	0.057
chr1	15649843	AT	A	UPSTREAM	MODIFIER	DDI2	normal_artifact;slippage;weak_evidence	STR	88,7	78,9	0.053	0.083
chr1	15716226	TTTTC	T	DOWNSTREAM	MODIFIER	RP11-288I21.1	normal_artifact;slippage	STR	98,8	95,19	0.068	0.157
chr1	15727509	C	T	SYNONYMOUS_CODING	LOW	PLEKHM2	normal_artifact	.	360,32	330,39	0.081	0.105
chr1	15769188	G	A	INTRON	MODIFIER	FBLIM1	weak_evidence	.	11,0	3,2	0.077	0.427
chr1	15807310	G	A	UTR_3_PRIME	MODIFIER	UQCRHL	weak_evidence	.	30,0	31,2	0.03	0.085
chr1	15807417	T	C	NON_SYNONYMOUS_CODING	MODERATE	UQCRHL	clustered_events;haplotype	.	140,0	126,4	0.007042	0.034
chr1	15807419	T	C	SYNONYMOUS_CODING	LOW	UQCRHL	clustered_events;haplotype	.	140,0	126,4	0.006979	0.034
chr1	15807483	T	C	NON_SYNONYMOUS_CODING	MODERATE	UQCRHL	clustered_events;haplotype	.	241,0	223,4	0.004108	0.022
chr1	15807492	T	C	NON_SYNONYMOUS_CODING	MODERATE	UQCRHL	clustered_events;haplotype;weak_evidence	.	246,0	237,3	0.003971	0.016
chr1	15828362	T	C	EXON	MODIFIER	RP11-169K16.8	clustered_events;haplotype	.	11,0	6,20	0.077	0.75
chr1	15828368	T	C	EXON	MODIFIER	RP11-169K16.8	clustered_events;haplotype	.	11,0	6,18	0.077	0.731
chr1	15828375	A	G	EXON	MODIFIER	RP11-169K16.8	clustered_events;haplotype	.	11,0	7,15	0.077	0.667
chr1	15828417	G	A	EXON	MODIFIER	RP11-169K16.8	clustered_events	.	20,0	7,11	0.046	0.6
chr1	15828429	G	A	EXON	MODIFIER	RP11-169K16.8	clustered_events;haplotype	.	19,0	5,10	0.048	0.647
chr1	15828436	T	C	EXON	MODIFIER	RP11-169K16.8	clustered_events;haplotype	.	21,0	7,10	0.043	0.579
chr1	15828445	A	G	EXON	MODIFIER	RP11-169K16.8	clustered_events;haplotype	.	22,0	8,9	0.042	0.526
chr1	15828447	G	A	EXON	MODIFIER	RP11-169K16.8	clustered_events;haplotype	.	22,0	8,9	0.041	0.526
chr1	15828485	A	G	EXON	MODIFIER	RP11-169K16.8	clustered_events	.	26,0	12,3	0.036	0.234
chr1	15841737	G	A	INTRON	MODIFIER	FLJ37453	weak_evidence	.	9,0	2,2	0.091	0.499
chr1	16001505	GA	G	UPSTREAM	MODIFIER	C1orf64	germline;slippage;weak_evidence	STR	8,0	6,5	0.097	0.458
chr1	16039589	T	A	UPSTREAM	MODIFIER	CLCNKB	haplotype;map_qual	.	18,0	22,3	0.05	0.147
chr1	16039611	A	G	UPSTREAM	MODIFIER	CLCNKB	haplotype;map_qual;strand_bias;weak_evidence	.	19,0	28,2	0.048	0.093
chr1	16062713	A	T	INTRON	MODIFIER	FAM131C	weak_evidence	.	9,0	9,2	0.091	0.229
chr1	16407748	G	T	INTRON	MODIFIER	SPATA21	weak_evidence	.	8,0	1,1	0.1	0.5
chr1	16421327	GCA	G	DOWNSTREAM	MODIFIER	SPATA21	normal_artifact;slippage;weak_evidence	STR	99,3	112,4	0.033	0.042
chr1	16535646	C	G	UPSTREAM	MODIFIER	RNU1-6P	germline;weak_evidence	.	8,0	9,2	0.1	0.231
chr1	16535691	G	A	UPSTREAM	MODIFIER	RP5-875O13.1	normal_artifact;weak_evidence	.	23,1	24,2	0.077	0.106
chr1	16536857	C	T	UPSTREAM	MODIFIER	RP5-875O13.1	map_qual;normal_artifact;strand_bias	.	321,4	414,10	0.014	0.023
chr1	16565360	G	A	INTRON	MODIFIER	NBPF1	clustered_events;map_qual;weak_evidence	.	14,0	20,3	0.061	0.158
chr1	16565410	G	A	INTRON	MODIFIER	NBPF1	clustered_events;normal_artifact	.	69,3	82,5	0.053	0.067
chr1	16565468	T	A	INTRON	MODIFIER	NBPF1	clustered_events;map_qual;normal_artifact	.	240,25	257,24	0.096	0.087
chr1	16565570	G	A	INTRON	MODIFIER	NBPF1	map_qual;normal_artifact	.	608,48	630,70	0.069	0.099
chr1	16565761	T	A,C	NON_SYNONYMOUS_CODING	MODERATE	NBPF1	map_qual;multiallelic;normal_artifact	.	89,4,10	72,5,13	0.046,0.103	0.063,0.150
chr1	16566994	C	T	INTRON	MODIFIER	NBPF1	map_qual;normal_artifact;weak_evidence	.	39,3	48,3	0.09	0.075
chr1	16574684	G	T	NON_SYNONYMOUS_CODING	MODERATE	NBPF1	normal_artifact;strand_bias;weak_evidence	.	200,8	220,3	0.043	0.018
chr1	16576328	G	C	SYNONYMOUS_CODING	LOW	NBPF1	map_qual;normal_artifact	.	519,42	528,44	0.074	0.076
chr1	16576448	T	C	SYNONYMOUS_CODING	LOW	NBPF1	clustered_events;normal_artifact	.	477,53	432,53	0.086	0.092
chr1	16576487	G	T	INTRON	MODIFIER	NBPF1	clustered_events;normal_artifact;weak_evidence	.	491,5	465,11	0.008105	0.022
chr1	16576613	A	T	INTRON	MODIFIER	NBPF1	clustered_events;haplotype;normal_artifact	.	232,8	219,10	0.036	0.04
chr1	16576625	T	C	INTRON	MODIFIER	NBPF1	clustered_events;haplotype;map_qual;normal_artifact	.	205,8	187,9	0.041	0.045
chr1	16577241	AG	CT	INTRON	MODIFIER	NBPF1	clustered_events;haplotype;normal_artifact	.	281,18	341,17	0.063	0.05
chr1	16577252	T	C	INTRON	MODIFIER	NBPF1	clustered_events;haplotype;normal_artifact	.	326,15	394,15	0.047	0.039
chr1	16577259	C	T	INTRON	MODIFIER	NBPF1	clustered_events;haplotype;normal_artifact	.	346,16	409,14	0.046	0.035
chr1	16577303	T	C	INTRON	MODIFIER	NBPF1	clustered_events;map_qual;normal_artifact;strand_bias	.	426,22	489,14	0.05	0.029
chr1	16577308	T	C	INTRON	MODIFIER	NBPF1	clustered_events;map_qual;normal_artifact;strand_bias	.	428,21	490,14	0.048	0.029
chr1	16580670	G	A	INTRON	MODIFIER	NBPF1	map_qual;normal_artifact	.	192,16	195,12	0.078	0.061
chr1	16580808	C	T	NON_SYNONYMOUS_CODING	MODERATE	NBPF1	haplotype;map_qual;normal_artifact;strand_bias	.	615,8	651,7	0.014	0.011
chr1	16580812	G	A	SYNONYMOUS_CODING	LOW	NBPF1	haplotype;map_qual;normal_artifact;strand_bias	.	613,10	655,8	0.017	0.013
chr1	16580971	G	A	INTRON	MODIFIER	NBPF1	map_qual;normal_artifact;weak_evidence	.	105,3	99,4	0.036	0.047
chr1	16581396	T	C	INTRON	MODIFIER	NBPF1	map_qual;normal_artifact;strand_bias	.	483,12	561,10	0.025	0.018
chr1	16581539	C	G	INTRON	MODIFIER	NBPF1	map_qual;normal_artifact;strand_bias	.	691,22	739,13	0.025	0.017
chr1	16581642	A	G	INTRON	MODIFIER	NBPF1	clustered_events;map_qual;normal_artifact	.	333,26	297,22	0.073	0.07
chr1	16581686	C	T	INTRON	MODIFIER	NBPF1	clustered_events;map_qual;normal_artifact;weak_evidence	.	189,16	158,5	0.081	0.035
chr1	16581728	T	A	INTRON	MODIFIER	NBPF1	clustered_events;normal_artifact;weak_evidence	.	86,2	68,4	0.032	0.066
chr1	16582364	A	T	INTRON	MODIFIER	NBPF1	germline;haplotype	.	14,0	15,6	0.063	0.3
chr1	16582369	C	A	INTRON	MODIFIER	NBPF1	germline;haplotype	.	15,0	15,6	0.059	0.299
chr1	16582725	T	C	NON_SYNONYMOUS_CODING	MODERATE	NBPF1	normal_artifact;strand_bias	.	22,1	26,3	0.079	0.129
chr1	16583512	C	T	INTRON	MODIFIER	NBPF1	clustered_events;haplotype;map_qual;normal_artifact	.	241,3	225,6	0.016	0.03
chr1	16583518	C	A	INTRON	MODIFIER	NBPF1	clustered_events;haplotype;map_qual;normal_artifact	.	260,4	249,9	0.019	0.038
chr1	16583529	C	T	INTRON	MODIFIER	NBPF1	clustered_events;haplotype;normal_artifact;strand_bias	.	297,6	292,14	0.023	0.049
chr1	16583568	CA	TG	INTRON	MODIFIER	NBPF1	clustered_events;map_qual;normal_artifact;strand_bias	.	443,27	473,32	0.059	0.063
chr1	16585601	G	A	SYNONYMOUS_CODING	LOW	NBPF1	clustered_events;haplotype;normal_artifact	.	75,3	90,3	0.05	0.042
chr1	16585604	G	C	NON_SYNONYMOUS_CODING	MODERATE	NBPF1	clustered_events;haplotype;normal_artifact	.	75,3	90,3	0.05	0.042
chr1	16585643	A	G	SYNONYMOUS_CODING	LOW	NBPF1	clustered_events;map_qual;normal_artifact;weak_evidence	.	84,6	108,7	0.071	0.053
chr1	16587576	G	A	INTRON	MODIFIER	NBPF1	normal_artifact	.	170,6	163,8	0.039	0.051
chr1	16587700	C	T	INTRON	MODIFIER	NBPF1	clustered_events;haplotype;normal_artifact;strand_bias	.	671,40	677,53	0.056	0.073
chr1	16587701	T	C	INTRON	MODIFIER	NBPF1	clustered_events;map_qual;normal_artifact	.	659,53	655,69	0.073	0.093
chr1	16587708	C	T	INTRON	MODIFIER	NBPF1	clustered_events;haplotype;map_qual;normal_artifact;strand_bias	.	717,36	721,51	0.049	0.067
chr1	16587844	G	C	INTRON	MODIFIER	NBPF1	clustered_events;map_qual;normal_artifact;strand_bias	.	622,15	671,25	0.022	0.03
chr1	16587991	C	T	INTRON	MODIFIER	NBPF1	normal_artifact	.	49,2	59,4	0.056	0.076
chr1	16589116	T	C	DOWNSTREAM	MODIFIER	NBPF1	map_qual;normal_artifact;weak_evidence	.	146,14	130,6	0.091	0.049
chr1	16589717	C	T	DOWNSTREAM	MODIFIER	NBPF1	map_qual;normal_artifact;weak_evidence	.	63,4	48,4	0.07	0.091
chr1	16589971	A	G	NON_SYNONYMOUS_CODING	MODERATE	NBPF1	clustered_events;normal_artifact;strand_bias	.	223,16	211,18	0.07	0.082
chr1	16589988	A	G	SYNONYMOUS_CODING	LOW	NBPF1	clustered_events;normal_artifact;strand_bias	.	217,12	210,10	0.056	0.049
chr1	16590000	C	T	SYNONYMOUS_CODING	LOW	NBPF1	clustered_events;normal_artifact;strand_bias	.	217,8	206,6	0.039	0.032
chr1	16591236	G	C	DOWNSTREAM	MODIFIER	NBPF1	germline;weak_evidence	.	8,0	5,3	0.1	0.4
chr1	16592222	C	T	UTR_5_PRIME	MODIFIER	NBPF1	map_qual;normal_artifact	.	52,3	53,18	0.069	0.26
chr1	16592239	G	C	START_GAINED	LOW	NBPF1	map_qual;normal_artifact	.	62,5	59,20	0.086	0.253
chr1	16611078	C	T	UPSTREAM	MODIFIER	NBPF1	germline;weak_evidence	.	8,0	10,4	0.091	0.309
chr1	16612192	C	T	UPSTREAM	MODIFIER	NBPF1	germline;weak_evidence	.	9,0	6,3	0.091	0.362
chr1	16619787	C	T	DOWNSTREAM	MODIFIER	RP5-1182A14.5	normal_artifact	.	68,4	69,10	0.068	0.135
chr1	16620250	G	A	DOWNSTREAM	MODIFIER	RP5-1182A14.5	germline;weak_evidence	.	11,0	6,2	0.077	0.305
chr1	16624174	T	C	DOWNSTREAM	MODIFIER	CROCCP2	PASS	.	23,0	29,3	0.039	0.117
chr1	16625553	G	A	DOWNSTREAM	MODIFIER	CROCCP2	weak_evidence	.	18,0	16,2	0.05	0.15
chr1	16626155	G	T	DOWNSTREAM	MODIFIER	CROCCP2	normal_artifact	.	206,17	181,29	0.079	0.137
chr1	16632678	G	A	INTRON	MODIFIER	CROCCP2	germline	.	12,0	8,4	0.072	0.356
chr1	16632769	G	T	INTRON	MODIFIER	CROCCP2	PASS	.	11,0	17,3	0.075	0.183
chr1	16634402	TGTGTGTGTGTGTGTGC	T	UPSTREAM	MODIFIER	CROCCP2	germline;normal_artifact	.	16,1	14,4	0.102	0.237
chr1	16636345	ACAAACAAACAAACAAC	A	UPSTREAM	MODIFIER	CROCCP2	weak_evidence	.	15,0	11,2	0.057	0.2
chr1	16642156	G	A	UPSTREAM	MODIFIER	MST1P2	germline;normal_artifact;weak_evidence	.	22,2	15,4	0.112	0.235
chr1	16642782	G	T	UPSTREAM	MODIFIER	MST1P2	normal_artifact	.	690,69	779,49	0.084	0.057
chr1	16642820	T	C	UPSTREAM	MODIFIER	MST1P2	normal_artifact	.	788,68	859,63	0.079	0.067
chr1	16645552	A	G	UPSTREAM	MODIFIER	CROCCP2	normal_artifact	.	962,86	960,96	0.08	0.09
chr1	16645639	C	T	UPSTREAM	MODIFIER	CROCCP2	clustered_events;normal_artifact	.	1168104	1153,96	0.08	0.074
chr1	16645687	C	T	UPSTREAM	MODIFIER	CROCCP2	clustered_events	.	1041,0	1015,20	0.0009522	0.019
chr1	16645695	T	C	UPSTREAM	MODIFIER	CROCCP2	clustered_events;normal_artifact	.	920,51	956,31	0.048	0.031
chr1	16645722	C	G	UPSTREAM	MODIFIER	CROCCP2	clustered_events;haplotype;map_qual;normal_artifact	.	730,16	770,18	0.018	0.023
chr1	16645744	G	A	UPSTREAM	MODIFIER	CROCCP2	clustered_events;haplotype;map_qual;normal_artifact	.	562,21	591,28	0.036	0.044
chr1	16645783	C	T	UPSTREAM	MODIFIER	CROCCP2	clustered_events;normal_artifact	.	312,11	347,9	0.037	0.028
chr1	16645799	T	C	UPSTREAM	MODIFIER	CROCCP2	clustered_events;normal_artifact	.	241,17	264,24	0.066	0.085
chr1	16646924	G	A	UPSTREAM	MODIFIER	CROCCP2	map_qual;normal_artifact;strand_bias	.	779,70	799,57	0.083	0.065
chr1	16647153	A	G	UPSTREAM	MODIFIER	CROCCP2	map_qual;normal_artifact;strand_bias	.	1123,31	1146,34	0.027	0.029
chr1	16647314	G	A	UPSTREAM	MODIFIER	CROCCP2	map_qual;normal_artifact;strand_bias	.	428,40	470,50	0.087	0.097
chr1	16647748	G	C	UPSTREAM	MODIFIER	CROCCP2	clustered_events;map_qual;normal_artifact;strand_bias	.	171,8	139,15	0.049	0.102
chr1	16647782	A	C	SPLICE_SITE_ACCEPTOR	HIGH	MST1P2	clustered_events;map_qual;normal_artifact;strand_bias	.	258,15	224,20	0.058	0.085
chr1	16647817	G	C	UPSTREAM	MODIFIER	CROCCP2	clustered_events;normal_artifact;strand_bias	.	375,27	321,24	0.068	0.072
chr1	16647966	GC	G	UPSTREAM	MODIFIER	CROCCP2	normal_artifact	.	945,48	908,39	0.028	0.022
chr1	16648054	C	G	UPSTREAM	MODIFIER	CROCCP2	normal_artifact;strand_bias	.	1495,9	1495,9	0.006584	0.005925
chr1	16648285	C	T	UPSTREAM	MODIFIER	CROCCP2	map_qual;normal_artifact;strand_bias	.	433,44	382,33	0.092	0.081
chr1	16648477	C	T	UPSTREAM	MODIFIER	CROCCP2	map_qual;normal_artifact	.	596,66	590,84	0.087	0.105
chr1	16648589	G	A	UPSTREAM	MODIFIER	CROCCP2	map_qual;normal_artifact	.	482,52	523,80	0.089	0.121
chr1	16648707	T	C	UPSTREAM	MODIFIER	CROCCP2	map_qual;normal_artifact	.	274,21	324,18	0.074	0.055
chr1	16648783	AC	A	UPSTREAM	MODIFIER	CROCCP2	map_qual;strand_bias;weak_evidence	STR	258,1	269,7	0.007127	0.025
chr1	16649373	T	A	UPSTREAM	MODIFIER	CROCCP2	map_qual;normal_artifact;strand_bias	.	263,19	253,23	0.068	0.084
chr1	16649417	CCCTGTT	C	UPSTREAM	MODIFIER	CROCCP2	map_qual;normal_artifact	.	241,6	231,5	0.028	0.025
chr1	16649939	G	A	EXON	MODIFIER	MST1P2	normal_artifact	.	372,21	382,14	0.055	0.036
chr1	16649956	G	A	INTRON	MODIFIER	MST1P2	map_qual;normal_artifact;strand_bias	.	376,34	353,40	0.082	0.099
chr1	16650074	G	A	EXON	MODIFIER	MST1P2	map_qual;normal_artifact	.	579,61	580,83	0.095	0.124
chr1	16650277	G	T	EXON	MODIFIER	MST1P2	normal_artifact;strand_bias	.	332,25	359,25	0.072	0.066
chr1	16650291	G	C	DOWNSTREAM	MODIFIER	MST1P2	map_qual;normal_artifact;strand_bias	.	277,13	279,12	0.047	0.044
chr1	16705509	G	A	DOWNSTREAM	MODIFIER	ESPNP	weak_evidence	.	8,0	0,1	0.097	0.667
chr1	16757082	C	T	DOWNSTREAM	MODIFIER	MST1L	map_qual;normal_artifact;weak_evidence	.	71,3	57,4	0.052	0.077
chr1	16757102	G	A	DOWNSTREAM	MODIFIER	MST1L	map_qual;normal_artifact	.	101,8	90,5	0.08	0.06
chr1	16757281	C	A	DOWNSTREAM	MODIFIER	MST1L	clustered_events;map_qual;normal_artifact	.	448,43	460,42	0.086	0.085
chr1	16757321	G	A	DOWNSTREAM	MODIFIER	MST1L	clustered_events;map_qual;normal_artifact;strand_bias;weak_evidence	.	517,8	544,7	0.014	0.014
chr1	16757377	G	A	DOWNSTREAM	MODIFIER	MST1L	clustered_events;normal_artifact	.	406,16	438,8	0.04	0.02
chr1	16757434	A	C	DOWNSTREAM	MODIFIER	MST1L	clustered_events;map_qual;normal_artifact	.	346,12	345,11	0.035	0.033
chr1	16757511	C	T	DOWNSTREAM	MODIFIER	MST1L	map_qual;normal_artifact	.	601,31	614,34	0.048	0.051
chr1	16758511	C	T	DOWNSTREAM	MODIFIER	MST1L	map_qual;normal_artifact	.	654,65	745109	0.087	0.122
chr1	16758533	G	A	DOWNSTREAM	MODIFIER	MST1L	map_qual;normal_artifact;strand_bias	.	692,13	807,19	0.019	0.023
chr1	16758676	TG	T	DOWNSTREAM	MODIFIER	MST1L	normal_artifact	STR	340,19	368,71	0.037	0.142
chr1	16758770	T	C	DOWNSTREAM	MODIFIER	MST1L	haplotype;map_qual;normal_artifact;strand_bias	.	665,18	727,12	0.026	0.017
chr1	16758772	A	G	DOWNSTREAM	MODIFIER	MST1L	haplotype;map_qual;normal_artifact;strand_bias	.	665,18	727,12	0.026	0.017
chr1	16758990	G	A	UPSTREAM	MODIFIER	MST1L	clustered_events;map_qual;normal_artifact;strand_bias	.	985,18	1073,13	0.017	0.012
chr1	16759047	G	A	UPSTREAM	MODIFIER	MST1L	clustered_events;map_qual;normal_artifact;strand_bias	.	844,43	912,34	0.047	0.036
chr1	16759069	A	G	UPSTREAM	MODIFIER	MST1L	clustered_events;map_qual;normal_artifact;strand_bias	.	816,71	905,58	0.079	0.06
chr1	16759296	G	A	UPSTREAM	MODIFIER	MST1L	clustered_events;normal_artifact;strand_bias	.	982,53	1096,55	0.05	0.046
chr1	16759300	G	T	UPSTREAM	MODIFIER	MST1L	clustered_events;normal_artifact;strand_bias	.	980,64	1051104	0.059	0.089
chr1	16759325	G	A	UPSTREAM	MODIFIER	MST1L	clustered_events;map_qual;normal_artifact;strand_bias	.	1031,17	1089,26	0.016	0.023
chr1	16760375	T	C	UPSTREAM	MODIFIER	MST1L	map_qual;normal_artifact	.	732,76	753,76	0.094	0.091
chr1	16760797	A	G	UPSTREAM	MODIFIER	MST1L	clustered_events;haplotype;map_qual;normal_artifact;strand_bias	.	932,35	981,20	0.037	0.021
chr1	16760804	T	C	UPSTREAM	MODIFIER	MST1L	clustered_events;haplotype;map_qual;normal_artifact;strand_bias	.	930,38	977,23	0.04	0.024
chr1	16760810	G	C	UPSTREAM	MODIFIER	MST1L	clustered_events;haplotype;map_qual;normal_artifact;strand_bias	.	888,41	951,26	0.045	0.027
chr1	16858860	T	C	DOWNSTREAM	MODIFIER	MIR3675	germline;map_qual	.	11,0	14,5	0.075	0.287
chr1	16868736	A	G	UPSTREAM	MODIFIER	RP11-108M9.3	map_qual;normal_artifact;strand_bias	.	127,4	98,6	0.037	0.066
chr1	16868756	C	G	UPSTREAM	MODIFIER	RP11-108M9.3	map_qual;normal_artifact;strand_bias	.	90,5	83,15	0.061	0.16
chr1	16940113	TG	T	UPSTREAM	MODIFIER	CROCC	PASS	STR	97,0	124,7	0.009898	0.053
chr1	16945549	A	G	SYNONYMOUS_CODING	LOW	CROCC	normal_artifact	.	277,9	261,10	0.034	0.039
chr1	16946784	G	A	SYNONYMOUS_CODING	LOW	CROCC	PASS	.	282,0	297,7	0.003467	0.025
chr1	16950991	C	T	STOP_GAINED	HIGH	CROCC	normal_artifact	.	70,3	33,15	0.053	0.311
chr1	16955264	C	CG	DOWNSTREAM	MODIFIER	CROCC	normal_artifact	STR	74,4	72,16	0.047	0.163
chr1	17027878	GGAA	G	UPSTREAM	MODIFIER	SDHB	normal_artifact;slippage	STR	107,1	66,4	0.017	0.068
chr1	17618489	CCCT	C	CODON_CHANGE_PLUS_CODON_DELETION	MODERATE	ARHGEF10L	normal_artifact;slippage;weak_evidence	STR	78,2	98,3	0.035	0.038
chr1	18335044	G	A	INTRON	MODIFIER	IGSF21	normal_artifact	.	174,13	168,37	0.069	0.18
chr1	18631409	T	TC	UPSTREAM	MODIFIER	PAX7	normal_artifact	STR	19,1	19,4	0.091	0.202
chr1	18676453	G	A	INTRON	MODIFIER	PAX7	weak_evidence	.	9,0	10,2	0.091	0.214
chr1	18744685	GATAA	G	INTRON	MODIFIER	PAX7	germline;normal_artifact	.	31,1	15,6	0.054	0.302
chr11	70338440	T	C	NON_SYNONYMOUS_CODING	MODERATE	PPFIA1	PASS	.	41,1	44,14	0.045	0.249
chr1	18855099	G	T	INTRON	MODIFIER	TAS1R2	normal_artifact	.	28,1	31,5	0.061	0.156
chr1	18896892	CAA	C,CAAA	DOWNSTREAM	MODIFIER	MIR1290	germline;normal_artifact	STR	19,9,1	25,16,4	0.312,0.023	0.353,0.094
chr1	18956231	CCCG	C	CODON_CHANGE_PLUS_CODON_DELETION	MODERATE	IFFO2	slippage;strand_bias;weak_evidence	STR	198,2	205,3	0.011	0.019
chr1	19147106	A	C	UPSTREAM	MODIFIER	UBR4	base_qual;strand_bias	.	53,0	60,8	0.018	0.092
chr1	19187076	TTATA	T,TTA,TTATATA	INTRON	MODIFIER	UBR4	germline;multiallelic;normal_artifact	STR	22,1,22,1	23,5,31,4	0.037,0.462,0.039	0.086,0.483,0.072
chr1	19192098	C	T	INTRON	MODIFIER	UBR4	PASS	.	37,0	42,5	0.026	0.122
chr1	19268764	C	CA	DOWNSTREAM	MODIFIER	AKR7L	normal_artifact	STR	189,16	206,24	0.073	0.086
chr1	19304435	T	C	DOWNSTREAM	MODIFIER	AKR7A2	normal_artifact;strand_bias	.	94,5	96,5	0.059	0.058
chr1	19608323	G	A	INTRON	MODIFIER	MINOS1	clustered_events	.	355,0	399,5	0.002801	0.015
chr1	19608342	A	G	INTRON	MODIFIER	MINOS1	clustered_events;haplotype	.	353,0	400,5	0.002803	0.015
chr1	19608344	CA	TG	INTRON	MODIFIER	MINOS1	clustered_events;haplotype;weak_evidence	.	354,0	401,4	0.002802	0.012
chr1	20345624	TG	T	INTRON	MODIFIER	VWA5B1	normal_artifact;weak_evidence	STR	52,3	36,3	0.053	0.098
chr1	20568460	C	T	INTERGENIC	MODIFIER		weak_evidence	.	10,0	3,2	0.084	0.446
chr1	20685897	C	T	UPSTREAM	MODIFIER	KIF17	normal_artifact	.	81,7	97,7	0.087	0.074
chr1	20726966	C	A	INTRON	MODIFIER	SH2D5	normal_artifact	.	193,15	205,25	0.075	0.109
chr1	20891471	GA	G	DOWNSTREAM	MODIFIER	EIF4G3	slippage;weak_evidence	STR	8,0	6,2	0.096	0.318
chr1	21298925	G	A	INTRON	MODIFIER	ECE1	PASS	.	84,0	80,7	0.012	0.09
chr1	21426337	C	T	UPSTREAM	MODIFIER	HS6ST1P1	map_qual;normal_artifact;strand_bias	.	240,19	232,22	0.076	0.089
chr1	21483357	T	C	NON_SYNONYMOUS_CODING	MODERATE	NBPF3	normal_artifact;strand_bias	.	72,2	66,6	0.039	0.094
chr1	21603937	CAG	C	INTRON	MODIFIER	RAP1GAP	normal_artifact;slippage	STR	149,7	153,9	0.044	0.055
chr1	21757663	CT	C	FRAME_SHIFT	HIGH	USP48	normal_artifact;weak_evidence	STR	103,9	131,5	0.083	0.04
chr1	21791176	A	G	INTERGENIC	MODIFIER		weak_evidence	.	8,0	2,2	0.1	0.5
chr1	21814452	G	A	NON_SYNONYMOUS_CODING	MODERATE	LDLRAD2	normal_artifact	.	422,38	472,22	0.083	0.045
chr1	21859988	G	A	SYNONYMOUS_CODING	LOW	HSPG2	normal_artifact	.	390,4	421,32	0.011	0.066
chr1	21874592	G	A	DOWNSTREAM	MODIFIER	HSPG2	normal_artifact	.	148,10	147,20	0.063	0.123
chr1	22002726	C	T	INTRON	MODIFIER	CELA3A	map_qual;normal_artifact;strand_bias	.	420,39	402,39	0.086	0.09
chr11	67611952	G	A	NON_SYNONYMOUS_CODING	MODERATE	NDUFV1	PASS	.	339,0	277,93	0.002894	0.246
chr1	22164379	G	T	INTERGENIC	MODIFIER		weak_evidence	.	10,0	2,2	0.083	0.518
chr1	22508201	TAC	T	DOWNSTREAM	MODIFIER	ZBTB40	normal_artifact;slippage	STR	44,2	46,5	0.055	0.111
chr1	22595720	G	T	INTRON	MODIFIER	EPHA8	weak_evidence	.	8,0	3,2	0.1	0.428
chr1	22597885	TC	T	INTRON	MODIFIER	EPHA8	normal_artifact	STR	245,18	226,34	0.054	0.124
chr1	22906122	T	C	INTRON	MODIFIER	EPHB2	normal_artifact	.	176,15	198,16	0.081	0.077
chr1	23030581	C	T	NON_SYNONYMOUS_CODING	MODERATE	KDM1A	normal_artifact	.	62,5	77,8	0.085	0.09
chr1	23094185	C	T	NON_SYNONYMOUS_CODING	MODERATE	LUZP1	normal_artifact	.	200,17	200,34	0.081	0.147
chr1	23193599	G	A	SYNONYMOUS_CODING	LOW	HTR1D	PASS	.	215,0	197,29	0.004551	0.129
chr1	23310381	A	AT	UTR_3_PRIME	MODIFIER	HNRNPR	normal_artifact;slippage;weak_evidence	STR	38,2	32,4	0.07	0.119
chr1	23581739	T	C	INTRON	MODIFIER	MDS2	normal_artifact;weak_evidence	.	25,1	33,5	0.067	0.123
chr1	23627048	GGA	G	UPSTREAM	MODIFIER	MDS2	normal_artifact;slippage;weak_evidence	STR	122,4	150,5	0.039	0.034
chr1	23652457	T	C	INTERGENIC	MODIFIER		weak_evidence	.	10,0	3,2	0.084	0.428
chr1	23743534	G	A	NON_SYNONYMOUS_CODING	MODERATE	TCEB3	normal_artifact	.	145,14	165,22	0.091	0.117
chr1	23756942	C	A	DOWNSTREAM	MODIFIER	TCEB3-AS1	normal_artifact;weak_evidence	.	11,1	26,2	0.101	0.1
chr11	46347688	C	A	NON_SYNONYMOUS_CODING	MODERATE	DGKZ	PASS	.	19,0	21,6	0.047	0.24
chr1	23961703	G	C	NON_SYNONYMOUS_CODING	MODERATE	PNRC2	map_qual;normal_artifact;weak_evidence	.	82,1	69,4	0.023	0.067
chr1	24092404	A	C	INTRON	MODIFIER	MYOM3	base_qual;weak_evidence	.	16,0	14,5	0.056	0.25
chr1	24180675	AG	CC	INTRON	MODIFIER	IFNLR1	base_qual;clustered_events;haplotype;normal_artifact;strand_bias	.	75,5	89,10	0.064	0.107
chr1	24180682	A	C	INTRON	MODIFIER	IFNLR1	clustered_events;haplotype;normal_artifact;strand_bias	.	84,5	99,10	0.058	0.098
chr1	24180686	A	C	INTRON	MODIFIER	IFNLR1	clustered_events;haplotype;normal_artifact;strand_bias	.	87,4	105,9	0.053	0.086
chr1	24180692	T	C	INTRON	MODIFIER	IFNLR1	clustered_events;haplotype;normal_artifact;strand_bias	.	89,2	113,5	0.032	0.05
chr1	24279218	C	A	INTERGENIC	MODIFIER		weak_evidence	.	9,0	3,2	0.091	0.428
chr1	24358427	AC	A	UTR_3_PRIME	MODIFIER	STPG1	normal_artifact	STR	249,27	201,12	0.083	0.051
chr1	24449551	A	C	SYNONYMOUS_CODING	LOW	NIPAL3	normal_artifact	.	116,5	122,10	0.042	0.082
chr1	24868846	T	C	INTERGENIC	MODIFIER		weak_evidence	.	11,0	3,2	0.077	0.427
chr1	25228342	AT	A	DOWNSTREAM	MODIFIER	SYF2	germline;weak_evidence	STR	8,0	7,2	0.1	0.271
chr1	25246385	C	T	UPSTREAM	MODIFIER	RSRP1	normal_artifact	.	192,7	196,20	0.04	0.095
chr1	25272713	A	C	UPSTREAM	MODIFIER	RSRP1	map_qual;normal_artifact;strand_bias	.	160,14	138,10	0.085	0.073
chr1	25390796	C	T	NON_SYNONYMOUS_CODING	MODERATE	RHCE	normal_artifact	.	323,27	357,25	0.077	0.067
chr1	25553770	CAAAAA	C,CA,CAA,CAAA,CAAAA,CAAAAAA	UPSTREAM	MODIFIER	LDLRAP1	germline;multiallelic;normal_artifact	STR	10,9,18,9,4,5,3	14,10,16,6,4,7,5	0.141,0.312,0.151,0.072,0.091,0.057	0.154,0.249,0.099,0.069,0.121,0.085
chr1	25563140	CT	C	FRAME_SHIFT	HIGH	LDLRAP1	normal_artifact	.	128,11	132,15	0.055	0.103
chr1	25618095	G	A	NON_SYNONYMOUS_CODING	MODERATE	MAN1C1	normal_artifact	.	176,5	190,19	0.033	0.094
chr1	25982385	G	A	SYNONYMOUS_CODING	LOW	PAFAH2	normal_artifact	.	101,5	102,11	0.053	0.103
chr1	26345479	CT	C	FRAME_SHIFT	HIGH	AIM1L	slippage	STR	129,1	124,11	0.015	0.079
chr1	26447629	TG	T	DOWNSTREAM	MODIFIER	DHDDS	normal_artifact	STR	99,10	118,10	0.094	0.073
chr1	26503002	G	T	INTERGENIC	MODIFIER		clustered_events;haplotype	.	8,0	4,2	0.1	0.375
chr1	26503012	A	G	INTERGENIC	MODIFIER		clustered_events;haplotype	.	8,0	5,2	0.1	0.333
chr1	26503014	C	T	INTERGENIC	MODIFIER		clustered_events;haplotype	.	9,0	5,2	0.091	0.333
chr1	26558819	TC	T	DOWNSTREAM	MODIFIER	RPS6KA1	normal_artifact	STR	170,10	163,20	0.049	0.1
chr1	26773690	CGCA	C	UPSTREAM	MODIFIER	ARID1A	normal_artifact;slippage;weak_evidence	STR	275,9	364,6	0.034	0.018
chr1	26780772	TC	T,TCC	DOWNSTREAM	MODIFIER	ARID1A	multiallelic;normal_artifact;slippage	STR	75,4,12	66,15,8	0.039,0.137	0.157,0.090
chr1	26863968	CG	C	UTR_3_PRIME	MODIFIER	SFN	clustered_events;haplotype;normal_artifact;strand_bias	.	77,5	96,12	0.071	0.114
chr1	26863972	A	C	UTR_3_PRIME	MODIFIER	SFN	clustered_events;haplotype;normal_artifact;strand_bias	.	77,5	94,12	0.071	0.116
chr1	26863975	G	C	UTR_3_PRIME	MODIFIER	SFN	clustered_events;haplotype;normal_artifact;strand_bias	.	76,5	89,12	0.072	0.121
chr1	26863980	G	C	UTR_3_PRIME	MODIFIER	SFN	clustered_events;haplotype;normal_artifact;strand_bias	.	75,5	85,9	0.073	0.104
chr1	26863983	CTG	C	UTR_3_PRIME	MODIFIER	SFN	clustered_events;haplotype;normal_artifact;strand_bias	.	73,4	81,9	0.063	0.108
chr1	26863991	T	C	UTR_3_PRIME	MODIFIER	SFN	clustered_events;haplotype;normal_artifact;strand_bias	.	67,2	81,7	0.042	0.089
chr1	26863993	CAGT	C	UTR_3_PRIME	MODIFIER	SFN	clustered_events;haplotype;normal_artifact;strand_bias	.	66,2	82,7	0.043	0.088
chr1	26950652	T	A	DOWNSTREAM	MODIFIER	NUDC	base_qual;normal_artifact;strand_bias;weak_evidence	.	49,5	63,11	0.058	0.114
chr1	27213708	T	C	DOWNSTREAM	MODIFIER	SNRPEP7	weak_evidence	.	9,0	3,2	0.092	0.428
chr1	27294616	TG	T	FRAME_SHIFT	HIGH	WDTC1	normal_artifact;slippage;weak_evidence	STR	97,13	90,11	0.098	0.082
chr1	27298007	G	A	SYNONYMOUS_CODING	LOW	WDTC1	PASS	.	174,0	136,39	0.005661	0.224
chr1	27325857	C	T	DOWNSTREAM	MODIFIER	RNU6-48P	weak_evidence	.	21,0	16,2	0.043	0.15
chr1	27332795	A	T	UPSTREAM	MODIFIER	TMEM222	weak_evidence	.	11,0	3,1	0.077	0.333
chr1	27332797	CA	GT	UPSTREAM	MODIFIER	TMEM222	weak_evidence	.	11,0	3,1	0.077	0.333
chr1	27335294	G	T	DOWNSTREAM	MODIFIER	TMEM222	normal_artifact	.	83,4	65,5	0.053	0.083
chr1	27416025	T	C	NON_SYNONYMOUS_CODING	MODERATE	WASF2	normal_artifact	.	111,9	84,27	0.079	0.245
chr1	27418298	A	G	SYNONYMOUS_CODING	LOW	WASF2	normal_artifact	.	58,5	52,6	0.082	0.116
chr1	27548841	AAGG	A	CODON_CHANGE_PLUS_CODON_DELETION	MODERATE	AHDC1	normal_artifact;slippage;weak_evidence	STR	113,1	145,3	0.016	0.026
chr1	27549270	G	A	NON_SYNONYMOUS_CODING	MODERATE	AHDC1	normal_artifact	.	175,17	176,30	0.091	0.146
chr1	27550993	C	CG	FRAME_SHIFT	HIGH	AHDC1	normal_artifact	STR	332,42	343,74	0.091	0.161
chr1	27882057	AAA	CCA,CCC	NON_SYNONYMOUS_CODING	MODERATE	THEMIS2	multiallelic;strand_bias	.	355,15,0	326,58,51	0.011,2.612e-03	0.117,0.117
chr1	28096456	CT	C,CTT	UPSTREAM	MODIFIER	SPCS2P4	germline;multiallelic;normal_artifact	STR	99,220,5	102,247,9	0.695,7.425e-03	0.693,0.025
chr1	28246782	GA	G,GAA	UPSTREAM	MODIFIER	RP5-1092A3.5	normal_artifact;slippage	STR	17,2,17	10,6,8	0.075,0.442	0.243,0.308
chr1	28268735	AAAGG	A	INTRON	MODIFIER	SESN2	germline;slippage	STR	12,0	10,5	0.07	0.356
chr1	28344524	T	C	INTERGENIC	MODIFIER		weak_evidence	.	8,0	3,2	0.1	0.428
chr1	28506201	CTTT	C,CTT,CTTTT	UPSTREAM	MODIFIER	SNHG3	germline;multiallelic;normal_artifact	STR	6,10,10,2	23,5,7,5	0.347,0.392,0.067	0.161,0.206,0.127
chr1	28516759	CAG	C	UPSTREAM	MODIFIER	RCC1	slippage;weak_evidence	STR	42,0	48,6	0.022	0.116
chr1	28532798	T	A	UPSTREAM	MODIFIER	RCC1	PASS	.	247,0	267,59	0.004001	0.18
chr1	28537969	C	T	PROTEIN_STRUCTURAL_INTERACTION_LOCUS	HIGH	RCC1	normal_artifact	.	119,10	144,11	0.083	0.076
chr1	28742384	CT	C	INTRON	MODIFIER	YTHDF2	normal_artifact;slippage	STR	54,3	68,16	0.069	0.186
chr1	29097809	TC	T	FRAME_SHIFT	HIGH	EPB41	normal_artifact	STR	116,5	170,14	0.041	0.071
chr1	29148706	CCTT	C	CODON_DELETION	MODERATE	SRSF4	normal_artifact;slippage;weak_evidence	STR	183,4	219,3	0.026	0.018
chr1	29283000	G	A	UPSTREAM	MODIFIER	PTPRU	normal_artifact	.	77,4	73,19	0.059	0.212
chr1	29515788	CCTT	C	INTERGENIC	MODIFIER		slippage;weak_evidence	STR	27,0	37,3	0.034	0.094
chr1	30742673	A	G	UPSTREAM	MODIFIER	MIR4420	normal_artifact	.	175,10	124,6	0.053	0.053
chr1	30916418	G	T	DOWNSTREAM	MODIFIER	RN7SL371P	weak_evidence	.	8,0	1,1	0.1	0.5
chr1	30941049	AAAC	A	INTRON	MODIFIER	PUM1	slippage;weak_evidence	STR	32,0	32,2	0.028	0.083
chr1	31227181	C	A	INTRON	MODIFIER	NKAIN1	weak_evidence	.	9,0	4,2	0.091	0.383
chr1	31422541	A	G	INTRON	MODIFIER	SERINC2	weak_evidence	.	8,0	2,1	0.1	0.4
chr1	31652558	AC	A	UTR_3_PRIME	MODIFIER	COL16A1	normal_artifact	.	95,8	97,15	0.08	0.108
chr1	31665146	CTT	C	UPSTREAM	MODIFIER	COL16A1	normal_artifact	STR	131,8	113,29	0.063	0.208
chr1	31691109	G	T	UPSTREAM	MODIFIER	COL16A1	normal_artifact	.	180,7	182,24	0.041	0.117
chr1	31733122	G	A	SYNONYMOUS_CODING	LOW	ADGRB2	normal_artifact	.	72,6	92,9	0.087	0.095
chr1	31744413	A	C	UPSTREAM	MODIFIER	ADGRB2	base_qual;strand_bias	.	67,0	61,22	0.014	0.229
chr1	31790971	TC	T	FRAME_SHIFT	HIGH	SPOCD1	normal_artifact	STR	162,17	173,41	0.091	0.18
chr1	31793204	AAG	A	DOWNSTREAM	MODIFIER	SPOCD1	germline;slippage	STR	11,0	9,4	0.077	0.333
chr1	32160859	A	G	INTRON	MODIFIER	KPNA6	PASS	.	32,1	21,10	0.032	0.333
chr1	32205702	T	A	SYNONYMOUS_CODING	LOW	IQCC	normal_artifact	.	157,11	140,35	0.069	0.195
chr1	32206226	G	T	STOP_GAINED	HIGH	IQCC	normal_artifact	.	276,22	284,73	0.075	0.202
chr1	32536773	C	A	UPSTREAM	MODIFIER	ZBTB8A	normal_artifact	.	47,3	26,7	0.077	0.221
chr1	32615452	C	T	INTRON	MODIFIER	ZBTB8OS	weak_evidence	.	8,0	8,3	0.1	0.305
chr1	32632587	G	GT	UPSTREAM	MODIFIER	ZBTB8OS	weak_evidence	STR	12,0	6,2	0.073	0.305
chr1	32656455	C	T	DOWNSTREAM	MODIFIER	RBBP4	weak_evidence	.	8,0	3,2	0.1	0.428
chr1	32768279	G	T	INTRON	MODIFIER	KIAA1522	strand_bias;weak_evidence	.	28,0	17,2	0.033	0.141
chr1	32789845	C	T	UPSTREAM	MODIFIER	YARS	weak_evidence	.	10,0	3,2	0.083	0.428
chr1	33010803	T	G	UTR_3_PRIME	MODIFIER	AK2	fragment;normal_artifact;weak_evidence	.	68,4	63,2	0.068	0.045
chr1	33031819	CA	C	UPSTREAM	MODIFIER	Metazoa_SRP	normal_artifact	STR	42,3	39,6	0.062	0.136
chr1	33176569	C	T	UPSTREAM	MODIFIER	TRIM62	normal_artifact	.	45,3	45,5	0.08	0.115
chr16	57565248	C	A	NON_SYNONYMOUS_CODING	MODERATE	ADGRG5	PASS	.	37,0	31,9	0.025	0.238
chr1	33488421	T	C	INTRON	MODIFIER	ZSCAN20	normal_artifact	.	61,4	80,12	0.075	0.133
chr1	33493390	G	A	NON_SYNONYMOUS_CODING	MODERATE	ZSCAN20	normal_artifact	.	371,24	332,99	0.06	0.228
chr1	33616897	C	T	INTRON	MODIFIER	CSMD2	normal_artifact	.	267,13	274,27	0.048	0.09
chr1	33739042	C	A	INTRON	MODIFIER	CSMD2	weak_evidence	.	21,0	15,2	0.043	0.158
chr1	33751869	C	T	INTRON	MODIFIER	CSMD2	weak_evidence	.	9,0	2,2	0.091	0.499
chr1	33864714	A	G	NON_SYNONYMOUS_CODING	MODERATE	HMGB4	normal_artifact	.	92,6	80,22	0.07	0.217
chr1	34905129	AC	A	FRAME_SHIFT	HIGH	DLGAP3	normal_artifact;slippage	STR	146,14	152,22	0.068	0.12
chr1	35010678	T	A	UPSTREAM	MODIFIER	ZMYM6	normal_artifact	.	52,3	47,4	0.07	0.094
chr1	35385662	G	GT	INTRON	MODIFIER	ZMYM4	slippage;weak_evidence	STR	64,0	56,9	0.014	0.113
chr1	35392446	T	C	UPSTREAM	MODIFIER	ZMYM4	normal_artifact	.	39,3	61,10	0.074	0.15
chr1	35412161	G	A	DOWNSTREAM	MODIFIER	ZMYM4	clustered_events;haplotype;weak_evidence	.	8,0	2,1	0.1	0.4
chr1	35412169	G	A	DOWNSTREAM	MODIFIER	ZMYM4	clustered_events;germline;haplotype;weak_evidence	.	8,0	2,1	0.1	0.4
chr1	35412171	A	T	DOWNSTREAM	MODIFIER	ZMYM4	clustered_events;haplotype;weak_evidence	.	8,0	2,1	0.1	0.4
chr1	35412174	TG	CA	DOWNSTREAM	MODIFIER	ZMYM4	clustered_events;haplotype;weak_evidence	.	8,0	2,1	0.1	0.4
chr1	35825858	TTTTG	T	INTRON	MODIFIER	AGO4	normal_artifact;slippage;weak_evidence	STR	186,2	190,4	0.016	0.025
chr1	35850817	C	CA	UPSTREAM	MODIFIER	AGO4	normal_artifact;slippage;weak_evidence	STR	85,2	66,5	0.033	0.084
chr1	35915652	T	C	INTRON	MODIFIER	AGO1	normal_artifact	.	29,1	24,4	0.062	0.167
chr1	36043600	C	T	INTRON	MODIFIER	AGO3	normal_artifact	.	44,2	49,8	0.062	0.152
chr1	36098779	G	T	NON_SYNONYMOUS_CODING	MODERATE	COL8A2	normal_artifact	.	302,26	339,72	0.079	0.174
chr1	36107785	T	G	INTRON	MODIFIER	COL8A2	weak_evidence	.	12,0	8,2	0.072	0.253
chr1	36176569	G	A	SYNONYMOUS_CODING	LOW	MAP7D1	normal_artifact	.	116,1	110,7	0.017	0.067
chr1	36179538	C	T	SYNONYMOUS_CODING	LOW	MAP7D1	normal_artifact	.	144,16	145,27	0.097	0.16
chr1	36220472	T	C	UPSTREAM	MODIFIER	THRAP3	weak_evidence	.	8,0	2,2	0.1	0.499
chr1	36270939	T	C	INTRON	MODIFIER	THRAP3	weak_evidence	.	10,0	1,1	0.083	0.5
chr1	36319345	C	G	UPSTREAM	MODIFIER	RP11-268J15.5	normal_artifact	.	229,23	212,46	0.093	0.18
chr1	36322541	GTCC	G	CODON_CHANGE_PLUS_CODON_DELETION	MODERATE	EVA1B	normal_artifact	STR	195,15	201,24	0.075	0.109
chr1	36341719	A	G	UTR_3_PRIME	MODIFIER	STK40	normal_artifact	.	40,1	29,6	0.047	0.191
chr1	36344088	GC	G	INTRON	MODIFIER	STK40	normal_artifact;slippage;weak_evidence	STR	169,27	201,20	0.103	0.058
chr1	36384053	A	G	INTRON	MODIFIER	STK40	PASS	.	8,0	7,2	0.1	0.273
chr1	36825838	CAG	C	INTRON	MODIFIER	GRIK3	normal_artifact;slippage	STR	142,3	158,11	0.026	0.067
chr1	37495709	A	C	DOWNSTREAM	MODIFIER	MEAF6	normal_artifact;weak_evidence	.	42,5	47,4	0.089	0.094
chr1	37540069	T	C	UPSTREAM	MODIFIER	FTH1P1	normal_artifact	.	57,1	53,6	0.033	0.114
chr1	37574590	CA	C	UPSTREAM	MODIFIER	GNL2	normal_artifact	STR	67,1	81,6	0.028	0.079
chr1	37583970	A	G	UPSTREAM	MODIFIER	GNL2	normal_artifact	.	84,4	79,10	0.054	0.12
chr1	37690015	GT	G	UPSTREAM	MODIFIER	CDCA8	normal_artifact;slippage	STR	34,1	29,10	0.053	0.262
chr1	37719565	TG	T	FRAME_SHIFT	HIGH	EPHA10	normal_artifact	STR	134,12	118,15	0.079	0.092
chr1	37722074	T	G	UPSTREAM	MODIFIER	EPHA10	base_qual;strand_bias	.	93,0	65,11	0.01	0.105
chr1	37734535	AAAAT	A	DOWNSTREAM	MODIFIER	Y_RNA	normal_artifact;slippage;weak_evidence	STR	65,1	41,3	0.029	0.086
chr1	37753193	C	T	NON_SYNONYMOUS_CODING	MODERATE	EPHA10	normal_artifact	.	39,1	31,8	0.047	0.212
chr1	37794331	G	A	NON_SYNONYMOUS_CODING	MODERATE	MANEAL	normal_artifact	.	76,7	97,14	0.092	0.127
chr1	37809191	T	C	UTR_3_PRIME	MODIFIER	C1orf122	normal_artifact	.	133,6	123,15	0.049	0.112
chr1	37857690	A	G	UTR_5_PRIME	MODIFIER	MTF1	PASS	.	23,0	31,4	0.04	0.134
chr1	38886444	CT	C	UTR_3_PRIME	MODIFIER	RHBDL2	normal_artifact;slippage;weak_evidence	STR	23,1	29,3	0.076	0.117
chr1	39327175	G	GT	UPSTREAM	MODIFIER	MACF1	normal_artifact;slippage	STR	71,7	58,13	0.081	0.173
chr1	39334030	T	C	NON_SYNONYMOUS_CODING	MODERATE	MACF1	normal_artifact	.	104,9	101,19	0.086	0.163
chr1	39387193	G	A	NON_SYNONYMOUS_CODING	MODERATE	MACF1	normal_artifact	.	46,2	37,7	0.06	0.166
chr1	39387200	C	A	NON_SYNONYMOUS_CODING	MODERATE	MACF1	weak_evidence	.	52,0	46,2	0.018	0.059
chr1	39410471	C	T	NON_SYNONYMOUS_CODING	MODERATE	MACF1	normal_artifact	.	81,5	82,5	0.068	0.067
chr1	39515736	G	A	INTRON	MODIFIER	BMP8A	map_qual;normal_artifact;strand_bias	.	417,6	505,12	0.016	0.024
chr1	39522473	T	C	SYNONYMOUS_CODING	LOW	BMP8A	map_qual;normal_artifact;strand_bias	.	221,6	251,7	0.03	0.03
chr1	39522547	C	T	INTRON	MODIFIER	BMP8A	haplotype;map_qual;normal_artifact	.	200,12	210,14	0.06	0.066
chr1	39522566	T	TG	INTRON	MODIFIER	RP11-69E11.4	haplotype;map_qual;normal_artifact	STR	178,12	174,14	0.067	0.079
chr1	39945550	CG	TA	UPSTREAM	MODIFIER	Y_RNA	weak_evidence	.	9,0	0,1	0.091	0.667
chr1	39967822	A	C	NON_SYNONYMOUS_CODING	MODERATE	MFSD2A	base_qual;strand_bias	.	186,0	167,23	0.005285	0.073
chr1	40037758	C	A	UPSTREAM	MODIFIER	CAP1	weak_evidence	.	8,0	0,2	0.1	0.75
chr1	40290870	GT	G	FRAME_SHIFT	HIGH	ZMPSTE24	slippage;weak_evidence	STR	68,2	80,10	0.018	0.093
chr1	40317010	T	C	UPSTREAM	MODIFIER	COL9A2	normal_artifact	.	87,5	86,11	0.064	0.121
chr1	40486715	C	A	UPSTREAM	MODIFIER	ZFP69	weak_evidence	.	9,0	0,1	0.088	0.667
chr1	40909394	TTTA	T	INTERGENIC	MODIFIER		slippage;weak_evidence	STR	9,0	7,2	0.091	0.273
chr1	41200165	A	G	INTRON	MODIFIER	SCMH1	weak_evidence	.	8,0	2,1	0.101	0.4
chr1	41513253	T	G	NON_SYNONYMOUS_CODING	MODERATE	HIVEP3	base_qual;normal_artifact;strand_bias	.	156,29	174,30	0.106	0.113
chr1	42410104	G	GGGT	DOWNSTREAM	MODIFIER	RP11-157D18.2	normal_artifact;slippage	STR	201,16	188,21	0.074	0.092
chr1	42500418	TC	T	UPSTREAM	MODIFIER	TMSB4XP1	normal_artifact;weak_evidence	.	137,8	145,8	0.041	0.05
chr1	42536528	AAG	A	UPSTREAM	MODIFIER	CCDC30	normal_artifact;slippage	STR	170,10	161,11	0.053	0.062
chr1	42758862	G	T	SYNONYMOUS_CODING	LOW	P3H1	normal_artifact	.	95,5	95,8	0.056	0.085
chr1	42948698	GC	CG	DOWNSTREAM	MODIFIER	SLC2A1	PASS	.	8,0	2,2	0.1	0.5
chr1	43232407	G	T	INTRON	MODIFIER	EBNA1BP2	normal_artifact	.	46,4	50,5	0.085	0.095
chr1	43273544	G	A	UTR_3_PRIME	MODIFIER	TMEM125	normal_artifact	.	25,1	22,6	0.071	0.233
chr1	43276816	G	T	DOWNSTREAM	MODIFIER	TMEM125	weak_evidence	.	21,0	20,2	0.044	0.124
chr1	43305286	G	A	NON_SYNONYMOUS_CODING	MODERATE	TIE1	normal_artifact	.	307,20	281,28	0.063	0.087
chr1	43314053	TTGTG	T,TTG,TTGTGTG	UPSTREAM	MODIFIER	TIE1	germline;multiallelic;normal_artifact	STR	140,4,21,18	118,7,45,13	0.024,0.108,0.095	0.038,0.232,0.072
chr1	43326829	AT	A	DOWNSTREAM	MODIFIER	TIE1	germline;slippage;weak_evidence	STR	9,0	2,2	0.094	0.527
chr1	43387456	TA	T	UPSTREAM	MODIFIER	SZT2	normal_artifact	STR	58,6	53,23	0.092	0.286
chr1	43389881	C	T	UPSTREAM	MODIFIER	MED8	normal_artifact	.	182,7	183,18	0.041	0.09
chr1	43453563	A	C	UPSTREAM	MODIFIER	HYI-AS1	base_qual;normal_artifact;strand_bias;weak_evidence	.	148,13	128,9	0.059	0.053
chr1	43701202	A	C	UPSTREAM	MODIFIER	ST3GAL3	weak_evidence	.	10,0	3,2	0.083	0.427
chr1	43702790	G	A	UPSTREAM	MODIFIER	ST3GAL3	weak_evidence	.	21,0	18,2	0.041	0.136
chr1	43838114	CAAA	C,CA,CAA,CAAAA	UPSTREAM	MODIFIER	MIR6079	germline;multiallelic;normal_artifact	STR	12,6,19,24,4	16,8,40,10,9	0.095,0.268,0.399,0.062	0.079,0.500,0.105,0.109
chr1	43879318	CT	C	INTRON	MODIFIER	ST3GAL3	normal_artifact;slippage	STR	69,9	73,17	0.108	0.169
chr1	43929962	T	C	UPSTREAM	MODIFIER	ARTN	PASS	.	132,0	114,6	0.007408	0.056
chr1	43958502	G	A	SYNONYMOUS_CODING	LOW	IPO13	normal_artifact	.	200,6	170,7	0.029	0.044
chr1	43958547	G	A	SYNONYMOUS_CODING	LOW	IPO13	normal_artifact	.	139,13	120,16	0.089	0.122
chr1	43966577	T	A	SYNONYMOUS_CODING	LOW	IPO13	normal_artifact	.	234,24	225,28	0.091	0.107
chr1	43981334	TAGC	T	UPSTREAM	MODIFIER	B4GALT2	normal_artifact;slippage;weak_evidence	STR	191,4	224,5	0.024	0.024
chr1	44001729	CT	C	INTRON	MODIFIER	SLC6A9	normal_artifact;slippage	STR	49,4	46,13	0.091	0.22
chr1	44011068	C	T	DOWNSTREAM	MODIFIER	SLC6A9	normal_artifact	.	31,2	19,3	0.085	0.166
chr1	44118835	A	C	UPSTREAM	MODIFIER	KLF17	haplotype;normal_artifact;strand_bias	.	120,4	98,16	0.032	0.146
chr1	44118837	A	C	UPSTREAM	MODIFIER	KLF17	haplotype;normal_artifact;strand_bias	.	120,4	98,16	0.032	0.146
chr1	44122597	T	G	UPSTREAM	MODIFIER	RP11-570P14.1	base_qual;normal_artifact;strand_bias;weak_evidence	.	156,8	146,12	0.008467	0.045
chr1	44132103	T	C	DOWNSTREAM	MODIFIER	KLF17	weak_evidence	.	9,0	2,1	0.091	0.4
chr1	44339164	C	T	NON_SYNONYMOUS_CODING	MODERATE	ERI3	normal_artifact	.	96,8	113,24	0.077	0.179
chr1	44488498	A	G	INTRON	MODIFIER	RNF220	germline;weak_evidence	.	8,0	4,3	0.097	0.441
chr1	44622741	G	A	SPLICE_SITE_ACCEPTOR	HIGH	RNF220	normal_artifact	.	111,7	127,25	0.065	0.166
chr1	44786247	TG	T	INTRON	MODIFIER	BEST4	normal_artifact	STR	194,11	185,15	0.045	0.068
chr1	44978230	CA	C	INTRON	MODIFIER	EIF2B3	slippage;weak_evidence	STR	48,0	50,4	0.02	0.09
chr1	45008540	G	A	STOP_GAINED	HIGH	HECTD3	normal_artifact	.	118,4	110,12	0.039	0.104
chr1	45337957	GA	G	UPSTREAM	MODIFIER	TOE1	slippage;weak_evidence	STR	11,0	12,2	0.077	0.187
chr1	45625014	G	A	UPSTREAM	MODIFIER	CCDC17	germline;weak_evidence	.	8,0	7,3	0.1	0.331
chr1	45700221	G	A	UPSTREAM	MODIFIER	RP11-767N6.7	weak_evidence	.	26,0	21,2	0.036	0.119
chr1	46031668	GGT	G	UPSTREAM	MODIFIER	MAST2	normal_artifact;slippage;weak_evidence	STR	129,6	146,4	0.047	0.033
chr1	46035472	C	T	SYNONYMOUS_CODING	LOW	MAST2	normal_artifact	.	484,32	479,55	0.061	0.1
chr1	46285157	T	C	UTR_3_PRIME	MODIFIER	LRRC41	PASS	.	88,0	88,11	0.011	0.118
chr1	46583397	GA	G,GAA	DOWNSTREAM	MODIFIER	MKNK1	germline;normal_artifact	STR	46,55,2	60,40,4	0.527,0.028	0.386,0.047
chr1	46706191	C	A	INTRON	MODIFIER	EFCAB14	weak_evidence	.	8,0	2,3	0.1	0.581
chr1	46934152	C	G	INTRON	MODIFIER	CYP4A11	map_qual;normal_artifact;strand_bias	.	431,11	413,16	0.025	0.039
chr1	47067719	TA	T	INTRON	MODIFIER	CYP4Z1	normal_artifact;slippage	STR	113,8	94,7	0.065	0.072
chr1	47116615	A	G	INTRON	MODIFIER	CYP4Z1	normal_artifact;strand_bias	.	44,5	48,4	0.115	0.092
chr1	47141606	C	T	NON_SYNONYMOUS_CODING	MODERATE	CYP4A22	normal_artifact	.	206,10	235,14	0.05	0.058
chr1	47144445	C	T	NON_SYNONYMOUS_CODING	MODERATE	CYP4A22	map_qual;normal_artifact;strand_bias	.	305,10	284,17	0.034	0.059
chr1	47185274	C	A	DOWNSTREAM	MODIFIER	LINC00853	weak_evidence	.	23,0	25,2	0.039	0.103
chr1	22005790	C	T	NON_SYNONYMOUS_CODING	MODERATE	CELA3A	PASS	.	16,0	19,5	0.054	0.23
chr1	47280792	A	C	NON_SYNONYMOUS_CODING	MODERATE	STIL	normal_artifact	.	122,9	100,20	0.074	0.172
chr1	47438323	C	A	NON_SYNONYMOUS_CODING	MODERATE	FOXD2	normal_artifact	.	65,3	62,6	0.056	0.097
chr1	47954693	G	T	INTRON	MODIFIER	TRABD2B	weak_evidence	.	8,0	2,2	0.1	0.499
chr1	48230783	CAG	C	UPSTREAM	MODIFIER	RP5-1024N4.4	normal_artifact;slippage	STR	85,8	57,14	0.091	0.202
chr1	48418821	G	T	INTRON	MODIFIER	SPATA6	weak_evidence	.	12,0	4,2	0.07	0.373
chr1	49245675	A	AT	INTRON	MODIFIER	AGBL4	normal_artifact;slippage;weak_evidence	STR	81,8	77,7	0.076	0.084
chr1	50418812	C	T	SYNONYMOUS_CODING	LOW	DMRTA2	normal_artifact	.	183,13	193,14	0.066	0.067
chr1	50420991	G	A	SYNONYMOUS_CODING	LOW	DMRTA2	PASS	.	84,0	85,10	0.012	0.107
chr1	50705857	G	A	SYNONYMOUS_CODING	LOW	FAF1	normal_artifact;weak_evidence	.	62,4	72,4	0.064	0.063
chr1	51158046	A	C	EXON	MODIFIER	CFL1P2	clustered_events;weak_evidence	.	40,0	38,2	0.024	0.071
chr1	51158067	T	C	EXON	MODIFIER	CFL1P2	clustered_events;haplotype;weak_evidence	.	49,0	55,2	0.02	0.051
chr1	51158071	G	T	EXON	MODIFIER	CFL1P2	clustered_events;haplotype;weak_evidence	.	50,0	56,2	0.019	0.05
chr1	51158124	G	A	EXON	MODIFIER	CFL1P2	clustered_events;haplotype	.	75,0	80,3	0.013	0.047
chr1	51158127	T	C	EXON	MODIFIER	CFL1P2	clustered_events;haplotype	.	74,0	81,3	0.013	0.046
chr1	51158138	A	T	EXON	MODIFIER	CFL1P2	clustered_events;haplotype	.	86,0	91,3	0.011	0.042
chr1	51158145	T	C	EXON	MODIFIER	CFL1P2	clustered_events;haplotype	.	95,0	93,3	0.01	0.041
chr1	51158154	A	G	EXON	MODIFIER	CFL1P2	clustered_events;haplotype	.	99,0	100,3	0.009819	0.038
chr1	51302238	TG	T	FRAME_SHIFT	HIGH	TTC39A	normal_artifact	STR	110,4	101,28	0.028	0.197
chr1	51409548	T	A	NON_SYNONYMOUS_CODING	MODERATE	EPS15	normal_artifact	.	154,7	149,15	0.047	0.095
chr1	51776989	C	T	INTRON	MODIFIER	OSBPL9	normal_artifact	.	77,5	86,10	0.07	0.105
chr1	51790569	A	C	SYNONYMOUS_CODING	LOW	NRDC	base_qual;strand_bias	.	132,0	125,23	0.007359	0.109
chr1	51791586	G	T	SYNONYMOUS_CODING	LOW	NRDC	normal_artifact	.	135,9	130,16	0.062	0.11
chr1	52252895	T	C	UPSTREAM	MODIFIER	DNAJC19P7	PASS	.	21,0	17,7	0.044	0.308
chr1	52353617	TC	T	FRAME_SHIFT	HIGH	CC2D1B	normal_artifact	STR	392,33	379,41	0.063	0.084
chr1	52359725	C	T	NON_SYNONYMOUS_CODING	MODERATE	CC2D1B	normal_artifact	.	157,13	120,31	0.081	0.206
chr1	52477845	A	G	NON_SYNONYMOUS_CODING	MODERATE	ZCCHC11	normal_artifact	.	90,4	87,12	0.051	0.127
chr1	52481761	CTA	C	INTRON	MODIFIER	ZCCHC11	normal_artifact;slippage;weak_evidence	STR	40,4	59,2	0.1	0.047
chr1	52772481	T	A	INTRON	MODIFIER	ZYG11B	PASS	.	15,0	16,4	0.059	0.227
chr1	52772489	C	G	INTRON	MODIFIER	ZYG11B	PASS	.	15,0	17,4	0.058	0.217
chr1	52772585	A	C	INTRON	MODIFIER	ZYG11B	clustered_events	.	20,0	22,7	0.044	0.25
chr1	52772626	T	C	INTRON	MODIFIER	ZYG11B	clustered_events;haplotype	.	20,0	17,6	0.045	0.28
chr1	52772628	A	G	INTRON	MODIFIER	ZYG11B	clustered_events;haplotype	.	20,0	17,6	0.045	0.28
chr1	52772635	C	T	INTRON	MODIFIER	ZYG11B	clustered_events;haplotype	.	20,0	15,5	0.045	0.273
chr1	52772640	A	G	INTRON	MODIFIER	ZYG11B	clustered_events;haplotype	.	19,0	14,5	0.048	0.286
chr1	52821420	G	GT	DOWNSTREAM	MODIFIER	ZYG11B	normal_artifact;slippage;weak_evidence	STR	91,9	77,5	0.072	0.058
chr1	52880049	C	A	DOWNSTREAM	MODIFIER	RP4-631H13.2	weak_evidence	.	8,0	0,2	0.1	0.75
chr1	52921600	G	A	NON_SYNONYMOUS_CODING	MODERATE	ECHDC2	normal_artifact	.	231,20	266,30	0.08	0.103
chr1	53047871	C	T	NON_SYNONYMOUS_CODING	MODERATE	SCP2	normal_artifact	.	82,6	86,12	0.076	0.125
chr1	53074523	T	G	UPSTREAM	MODIFIER	PODN	base_qual;normal_artifact;strand_bias	.	133,11	142,15	0.054	0.063
chr1	53082128	AGAG	A	DOWNSTREAM	MODIFIER	PODN	slippage;weak_evidence	STR	104,0	139,5	0.008799	0.039
chr1	53214969	T	TA	UPSTREAM	MODIFIER	RP5-1024G6.2	normal_artifact;slippage	STR	28,2	14,7	0.093	0.335
chr1	53327726	C	T	UPSTREAM	MODIFIER	LRP8	normal_artifact	.	93,5	83,13	0.059	0.136
chr1	53366383	G	C	DOWNSTREAM	MODIFIER	RP11-117D22.2	clustered_events;haplotype	.	9,0	0,2	0.091	0.75
chr1	53366391	A	G	DOWNSTREAM	MODIFIER	RP11-117D22.2	clustered_events;haplotype	.	9,0	0,2	0.091	0.75
chr1	53366395	A	G	DOWNSTREAM	MODIFIER	RP11-117D22.2	clustered_events;haplotype	.	8,0	0,2	0.1	0.75
chr1	53594279	C	T	SYNONYMOUS_CODING	LOW	GLIS1	normal_artifact	.	287,22	303,32	0.065	0.092
chr1	54017251	G	A	INTRON	MODIFIER	LDLRAD1	PASS	.	17,0	15,3	0.048	0.2
chr1	54139545	C	T	NON_SYNONYMOUS_CODING	MODERATE	CDCP2	normal_artifact	.	106,6	121,13	0.048	0.102
chr1	54381049	C	A	INTRON	MODIFIER	SSBP3	weak_evidence	.	12,0	2,2	0.072	0.499
chr1	54512998	C	A	DOWNSTREAM	MODIFIER	RP5-866L20.1	clustered_events;haplotype;weak_evidence	.	9,0	2,1	0.091	0.4
chr1	54513007	C	A	DOWNSTREAM	MODIFIER	RP5-866L20.1	clustered_events;haplotype;weak_evidence	.	8,0	2,1	0.1	0.4
chr1	54513011	C	A	DOWNSTREAM	MODIFIER	RP5-866L20.1	clustered_events;haplotype;weak_evidence	.	8,0	2,1	0.1	0.4
chr1	54706489	G	C	NON_SYNONYMOUS_CODING	MODERATE	MROH7	normal_artifact	.	162,9	185,15	0.057	0.077
chr1	54875788	C	T	INTRON	MODIFIER	DHCR24	normal_artifact	.	67,5	56,17	0.079	0.239
chr1	54886778	A	C	UPSTREAM	MODIFIER	RP11-67L3.5	base_qual;normal_artifact	.	117,15	107,9	0.062	0.057
chr1	55039879	ACTG	A	CODON_CHANGE_PLUS_CODON_DELETION	MODERATE	PCSK9	normal_artifact;slippage;weak_evidence	STR	121,2	137,6	0.024	0.047
chr1	55075701	T	A	UPSTREAM	MODIFIER	USP24	weak_evidence	.	17,0	19,2	0.053	0.13
chr1	55292009	G	A	INTERGENIC	MODIFIER		weak_evidence	.	8,0	0,1	0.1	0.667
chr1	56691372	CT	C	INTRON	MODIFIER	PRKAA2	normal_artifact;weak_evidence	STR	62,6	79,6	0.091	0.072
chr1	56819406	G	A	UPSTREAM	MODIFIER	C1orf168	normal_artifact	.	69,4	56,6	0.067	0.11
chr1	56943559	T	TA	INTRON	MODIFIER	C8B	normal_artifact	STR	36,3	19,4	0.097	0.199
chr1	56956887	C	T	SYNONYMOUS_CODING	LOW	C8B	normal_artifact	.	128,9	92,17	0.07	0.161
chr1	57033171	TAC	T,TACAC,TACACAC	INTRON	MODIFIER	DAB1	germline;multiallelic;normal_artifact;slippage	STR	1,9,8,0	1,8,4,2	0.432,0.435,0.046	0.444,0.280,0.166
chr1	58084538	C	T	DOWNSTREAM	MODIFIER	RP11-393I23.4	normal_artifact;weak_evidence	.	27,2	26,3	0.094	0.127
chr1	58305899	A	G	INTRON	MODIFIER	DAB1	weak_evidence	.	11,0	3,2	0.077	0.426
chr1	58576762	C	G	NON_SYNONYMOUS_CODING	MODERATE	TACSTD2	normal_artifact	.	372,25	351,41	0.061	0.104
chr1	58631398	C	A	EXON	MODIFIER	RP4-592A1.2	weak_evidence	.	21,0	16,2	0.043	0.151
chr1	58682036	C	T	SYNONYMOUS_CODING	LOW	MYSM1	normal_artifact	.	103,10	96,30	0.094	0.238
chr1	59638192	TC	T	UPSTREAM	MODIFIER	FGGY	normal_artifact	STR	71,9	53,9	0.109	0.133
chr1	59860117	CT	C	UPSTREAM	MODIFIER	HOOK1	normal_artifact	STR	35,2	34,11	0.077	0.237
chr1	60001236	ACAACAG	A	INTRON	MODIFIER	C1orf87	normal_artifact;weak_evidence	.	107,1	94,3	0.018	0.04
chr1	60920341	C	A	INTRON	MODIFIER	NFIA	weak_evidence	.	8,0	1,2	0.1	0.599
chr1	60980542	T	C	INTRON	MODIFIER	NFIA	weak_evidence	.	8,0	2,2	0.101	0.499
chr1	61077446	TA	T	UPSTREAM	MODIFIER	NFIA	normal_artifact;slippage;weak_evidence	STR	43,2	49,5	0.052	0.092
chr1	61406566	A	C	NON_SYNONYMOUS_CODING	MODERATE	NFIA	strand_bias;weak_evidence	.	96,1	103,5	0.01	0.04
chr1	61749253	G	A	INTRON	MODIFIER	PATJ	PASS	.	9,0	6,3	0.091	0.369
chr1	61952274	GAGAGAA	G	UPSTREAM	MODIFIER	PATJ	normal_artifact;weak_evidence	.	25,1	24,3	0.066	0.134
chr1	62113835	G	A	INTRON	MODIFIER	PATJ	weak_evidence	.	11,0	6,3	0.077	0.368
chr1	62203065	G	A	INTRON	MODIFIER	L1TD1	weak_evidence	.	16,0	3,2	0.056	0.427
chr1	62206780	T	G	NON_SYNONYMOUS_CODING	MODERATE	L1TD1	normal_artifact	.	90,3	67,8	0.04	0.116
chr1	62220578	T	C	INTERGENIC	MODIFIER		weak_evidence	.	8,0	1,2	0.1	0.599
chr1	62375551	C	A	INTERGENIC	MODIFIER		weak_evidence	.	9,0	3,2	0.092	0.426
chr1	62442419	G	A	INTRON	MODIFIER	USP1	weak_evidence	.	30,0	20,2	0.031	0.126
chr1	62474115	G	GT	UPSTREAM	MODIFIER	DOCK7	normal_artifact;strand_bias;weak_evidence	STR	35,2	41,4	0.078	0.109
chr19	15244452	T	C	NON_SYNONYMOUS_CODING	MODERATE	BRD4	PASS	.	21,0	30,8	0.043	0.225
chr1	62619812	TA	T	UPSTREAM	MODIFIER	DOCK7	normal_artifact;slippage	STR	35,4	26,6	0.101	0.211
chr1	63371079	TA	T	FRAME_SHIFT	HIGH	ALG6	normal_artifact;slippage	STR	56,5	58,5	0.054	0.093
chr1	64673561	T	C	INTRON	MODIFIER	CACHD1	normal_artifact	.	33,2	46,5	0.078	0.112
chr1	64781715	T	A	INTRON	MODIFIER	RAVER2	weak_evidence	.	9,0	12,2	0.085	0.185
chr1	64844645	CA	C	UPSTREAM	MODIFIER	JAK1	germline;normal_artifact;slippage	STR	29,2	15,13	0.092	0.453
chr1	64860149	CG	C	FRAME_SHIFT	HIGH	JAK1	normal_artifact	STR	194,9	191,18	0.028	0.062
chr1	65572303	T	G	DOWNSTREAM	MODIFIER	RP11-430H12.2	normal_artifact	.	45,5	49,10	0.092	0.167
chr1	65626105	T	C	DOWNSTREAM	MODIFIER	LEPR	PASS	.	50,1	39,12	0.036	0.243
chr1	65629233	AT	A,ATT	DOWNSTREAM	MODIFIER	LEPR	germline;normal_artifact	STR	24,30,0	26,46,4	0.519,0.018	0.573,0.059
chr1	66368641	A	AT	DOWNSTREAM	MODIFIER	PDE4B	normal_artifact;slippage	STR	39,5	13,13	0.104	0.497
chr1	66827054	TA	T	INTRON	MODIFIER	WDR78	normal_artifact;slippage	STR	70,3	75,7	0.032	0.075
chr1	66843019	G	A	INTRON	MODIFIER	WDR78	weak_evidence	.	8,0	2,2	0.094	0.499
chr1	67430184	T	C	SYNONYMOUS_CODING	LOW	SERBP1	normal_artifact	.	202,18	206,22	0.084	0.099
chr1	68058123	C	A	INTRON	MODIFIER	GNG12-AS1	clustered_events;weak_evidence	.	19,0	23,4	0.047	0.17
chr1	68058138	A	T	INTRON	MODIFIER	GNG12-AS1	clustered_events;haplotype	.	27,0	27,4	0.034	0.151
chr1	68058143	G	A	INTRON	MODIFIER	GNG12-AS1	clustered_events;haplotype	.	27,0	27,4	0.034	0.151
chr1	69516430	G	A	INTERGENIC	MODIFIER		weak_evidence	.	8,0	1,2	0.097	0.6
chr1	70232024	AT	A	DOWNSTREAM	MODIFIER	SRSF11	normal_artifact;slippage	STR	49,5	57,9	0.067	0.128
chr1	70421688	A	C	INTRON	MODIFIER	CTH	base_qual;strand_bias	.	136,0	119,16	0.007218	0.072
chr1	70430548	AT	A,ATT	UPSTREAM	MODIFIER	CTH	germline;normal_artifact;slippage	STR	7,1,4	6,2,7	0.101,0.335	0.170,0.457
chr1	70862372	G	A	SYNONYMOUS_CODING	LOW	PTGER3	PASS	.	164,0	136,9	0.005978	0.066
chr1	71072094	G	A	UPSTREAM	MODIFIER	ZRANB2	PASS	.	30,1	29,8	0.035	0.221
chr1	71698143	TA	T	INTRON	MODIFIER	NEGR1	normal_artifact	STR	103,2	94,11	0.028	0.094
chr1	73526824	A	G	INTERGENIC	MODIFIER		PASS	.	17,0	1,3	0.052	0.666
chr1	74571915	A	G	SYNONYMOUS_CODING	LOW	ERICH3	normal_artifact	.	512,38	449,52	0.067	0.104
chr1	75765185	G	T	DOWNSTREAM	MODIFIER	ACADM	weak_evidence	.	9,0	3,2	0.091	0.429
chr1	75842813	G	A	INTRON	MODIFIER	MSH4	map_qual;normal_artifact;weak_evidence	.	26,1	19,4	0.067	0.185
chr1	75842847	C	T	INTRON	MODIFIER	MSH4	germline;map_qual;normal_artifact	.	17,1	11,4	0.099	0.292
chr1	75912660	G	A	INTRON	MODIFIER	MSH4	normal_artifact	.	40,3	32,6	0.088	0.175
chr1	76868591	CGCA	C	CODON_CHANGE_PLUS_CODON_DELETION	MODERATE	ST6GALNAC5	normal_artifact;slippage;weak_evidence	STR	274,7	311,6	0.021	0.02
chr1	76975833	G	A	INTRON	MODIFIER	ST6GALNAC5	weak_evidence	.	9,0	0,1	0.092	0.667
chr1	77282351	G	A	NON_SYNONYMOUS_CODING	MODERATE	AK5	normal_artifact	.	338,19	372,35	0.052	0.083
chr1	77774789	T	C	UPSTREAM	MODIFIER	MIGA1	normal_artifact	.	90,7	89,9	0.079	0.099
chr1	77970017	TAA	T,TA,TAAA	INTRON	MODIFIER	FUBP1	germline;multiallelic;normal_artifact	STR	20,9,32,6	33,3,25,12	0.127,0.488,0.083	0.054,0.335,0.150
chr1	78125858	T	C	INTRON	MODIFIER	GIPC2	normal_artifact	.	64,3	51,12	0.058	0.192
chr1	78921559	GA	G	INTRON	MODIFIER	ADGRL4	normal_artifact;slippage	STR	82,10	72,5	0.091	0.077
chr1	78935849	C	T	INTRON	MODIFIER	ADGRL4	weak_evidence	.	10,0	3,2	0.083	0.427
chr1	81192189	T	C	INTERGENIC	MODIFIER		germline	.	8,0	0,3	0.1	0.8
chr1	81501781	TCAG	T	UPSTREAM	MODIFIER	RP5-837I24.6	normal_artifact;slippage;strand_bias;weak_evidence	STR	71,1	91,2	0.027	0.031
chr1	81503378	CCAG	C	UPSTREAM	MODIFIER	RP5-837I24.6	normal_artifact;slippage;strand_bias;weak_evidence	STR	369,9	378,3	0.025	0.01
chr1	81614846	TTAAAAAA	T	INTRON	MODIFIER	ADGRL2	germline;weak_evidence	.	8,0	0,2	0.1	0.75
chr1	81981239	T	C	UPSTREAM	MODIFIER	ADGRL2	normal_artifact	.	62,4	65,9	0.073	0.13
chr1	84078120	C	T	START_GAINED	LOW	PRKACB	normal_artifact	.	122,1	94,6	0.016	0.068
chr1	84173142	TA	T	INTRON	MODIFIER	PRKACB	germline;slippage	STR	9,0	12,6	0.091	0.334
chr1	84235374	A	C	UTR_3_PRIME	MODIFIER	PRKACB	base_qual;strand_bias	.	144,0	104,17	0.006756	0.119
chr1	84244444	T	C	EXON	MODIFIER	RP11-82H13.2	strand_bias;weak_evidence	.	40,0	39,2	0.024	0.07
chr1	84299675	ATT	A	UPSTREAM	MODIFIER	SAMD13	weak_evidence	STR	16,0	20,3	0.054	0.142
chr1	84299681	T	A	UPSTREAM	MODIFIER	SAMD13	weak_evidence	.	15,0	21,2	0.058	0.12
chr1	84480936	CT	C	INTRON	MODIFIER	RPF1	normal_artifact;slippage	STR	66,4	93,10	0.053	0.085
chr1	84952694	C	A	INTRON	MODIFIER	MCOLN2	weak_evidence	.	18,0	21,2	0.05	0.12
chr1	85158731	CA	C	UTR_3_PRIME	MODIFIER	SYDE2	normal_artifact;slippage;weak_evidence	STR	46,2	60,5	0.06	0.074
chr1	86156531	GA	G	UTR_5_PRIME	MODIFIER	COL24A1	normal_artifact;weak_evidence	STR	68,5	55,7	0.068	0.104
chr1	86500086	CT	C,CTT	UTR_3_PRIME	MODIFIER	CLCA1	germline;multiallelic;normal_artifact;slippage	STR	22,3,22	20,12,21	0.075,0.464	0.230,0.402
chr1	86634490	A	G	INTRON	MODIFIER	CLCA3P	normal_artifact	.	27,2	33,5	0.075	0.15
chr1	87045614	G	C	UPSTREAM	MODIFIER	RP11-384B12.3	clustered_events;haplotype;weak_evidence	.	79,0	79,2	0.012	0.036
chr1	87045635	G	A	UPSTREAM	MODIFIER	RP11-384B12.3	clustered_events;haplotype;weak_evidence	.	66,0	68,2	0.015	0.042
chr1	87045646	T	C	UPSTREAM	MODIFIER	RP11-384B12.3	clustered_events	.	62,0	61,4	0.016	0.073
chr1	87045657	G	A	UPSTREAM	MODIFIER	RP11-384B12.3	clustered_events	.	60,0	48,4	0.016	0.091
chr1	87045671	C	T	UPSTREAM	MODIFIER	RP11-384B12.3	clustered_events	.	56,0	45,5	0.017	0.114
chr1	87045704	A	G	UPSTREAM	MODIFIER	RP11-384B12.3	clustered_events;weak_evidence	.	40,0	43,4	0.023	0.099
chr1	87045775	T	C	UPSTREAM	MODIFIER	RP11-384B12.3	weak_evidence	.	27,0	28,2	0.034	0.094
chr1	87045785	A	G	UPSTREAM	MODIFIER	RP11-384B12.3	weak_evidence	.	24,0	29,2	0.039	0.091
chr1	87072864	C	A	INTRON	MODIFIER	HS2ST1	weak_evidence	.	31,0	28,2	0.03	0.094
chr1	88949257	G	A	SYNONYMOUS_CODING	LOW	KYAT3	normal_artifact;weak_evidence	.	84,6	79,3	0.075	0.047
chr1	88983536	G	A	SYNONYMOUS_CODING	LOW	RBMXL1	clustered_events;haplotype;normal_artifact;strand_bias	.	123,1	119,5	0.016	0.048
chr1	88983546	T	C	NON_SYNONYMOUS_CODING	MODERATE	RBMXL1	clustered_events;haplotype;normal_artifact;strand_bias	.	132,3	114,7	0.029	0.065
chr1	88983554	T	A	NON_SYNONYMOUS_CODING	MODERATE	RBMXL1	clustered_events;haplotype;normal_artifact;strand_bias	.	124,3	110,8	0.031	0.075
chr1	88983595	C	T	NON_SYNONYMOUS_CODING	MODERATE	RBMXL1	clustered_events;normal_artifact	.	110,10	89,17	0.084	0.166
chr1	88983800	C	G	NON_SYNONYMOUS_CODING	MODERATE	RBMXL1	normal_artifact	.	195,7	186,17	0.038	0.082
chr1	89058732	C	T	UPSTREAM	MODIFIER	GBP1	normal_artifact	.	22,1	29,5	0.079	0.165
chr1	89192861	AC	A	INTRON	MODIFIER	GBP4	normal_artifact	STR	199,4	224,27	0.014	0.086
chr7	128906293	G	A	NON_SYNONYMOUS_CODING	MODERATE	KCP	PASS	.	53,0	34,9	0.018	0.222
chr1	89592683	GT	G,GTT	INTRON	MODIFIER	FLJ27354	germline;multiallelic;normal_artifact;slippage	STR	40,7,14	41,16,21	0.071,0.195	0.177,0.247
chr11	46347717	G	A	NON_SYNONYMOUS_CODING	MODERATE	DGKZ	PASS	.	34,0	29,8	0.027	0.222
chr1	91385269	CA	C	INTRON	MODIFIER	HFM1	normal_artifact;slippage	STR	51,4	43,13	0.059	0.219
chr1	91568714	A	G	INTERGENIC	MODIFIER		weak_evidence	.	8,0	2,1	0.1	0.401
chr1	91643688	G	A	EXON	MODIFIER	HSP90B3P	normal_artifact	.	136,11	111,9	0.076	0.077
chr1	92141033	CTA	C	DOWNSTREAM	MODIFIER	BTBD8	normal_artifact;weak_evidence	STR	40,2	38,2	0.068	0.071
chr1	92166939	AT	A	UPSTREAM	MODIFIER	BTBD8	normal_artifact;slippage	STR	61,9	57,11	0.117	0.143
chr1	92167959	C	T	SYNONYMOUS_CODING	LOW	BTBD8	normal_artifact;weak_evidence	.	47,2	63,4	0.059	0.071
chr1	92513527	ATATATATATATATATATATATATATATATATATATATATG	A	UTR_3_PRIME	MODIFIER	EVI5	normal_artifact	.	33,2	24,5	0.08	0.193
chr1	92694264	CAA	C,CA,CAAA	INTRON	MODIFIER	EVI5	germline;multiallelic;normal_artifact	STR	20,4,17,2	26,4,24,5	0.095,0.371,0.063	0.079,0.402,0.096
chr7	98993679	C	T	NON_SYNONYMOUS_CODING	MODERATE	TRRAP	PASS	.	234,0	191,54	0.004207	0.22
chr1	92846635	CT	C,CTT	DOWNSTREAM	MODIFIER	RPL5	germline;normal_artifact;slippage;weak_evidence	STR	12,3,0	10,3,3	0.219,0.049	0.209,0.208
chr10	132836147	A	G	NON_SYNONYMOUS_CODING	MODERATE	CFAP46	PASS	.	48,0	42,12	0.02	0.219
chr1	93180088	A	C	NON_SYNONYMOUS_CODING	MODERATE	TMED5	normal_artifact	.	95,9	95,10	0.092	0.097
chr1	93218889	C	A	UPSTREAM	MODIFIER	CCDC18	weak_evidence	.	9,0	1,2	0.092	0.599
chr1	93576114	C	T	NON_SYNONYMOUS_CODING	MODERATE	BCAR3	normal_artifact	.	151,9	145,26	0.059	0.155
chr1	94010688	GA	G	UPSTREAM	MODIFIER	ABCA4	normal_artifact	STR	93,1	89,7	0.021	0.074
chr1	94083470	AAT	A	INTRON	MODIFIER	ABCA4	slippage	STR	147,0	114,14	0.006565	0.114
chr1	94276515	A	G	UPSTREAM	MODIFIER	ARHGAP29	weak_evidence	.	9,0	7,3	0.091	0.333
chr1	94418421	AGCC	A	UPSTREAM	MODIFIER	ABCD3	normal_artifact;slippage	STR	106,7	131,10	0.068	0.076
chr1	94899347	C	T	DOWNSTREAM	MODIFIER	SLC44A3	normal_artifact	.	48,4	53,13	0.092	0.205
chr1	96679579	A	C	EXON	MODIFIER	RPL7P9	map_qual	.	12,0	12,21	0.072	0.629
chr1	98342150	G	C	INTERGENIC	MODIFIER		base_qual;haplotype;weak_evidence	.	9,0	3,1	0.091	0.333
chr1	98342151	CTTGG	C	INTERGENIC	MODIFIER		base_qual;haplotype;weak_evidence	.	10,0	4,1	0.083	0.286
chr1	100110557	CA	C	INTRON	MODIFIER	SASS6	normal_artifact;slippage;weak_evidence	STR	52,4	60,7	0.085	0.088
chr1	100123245	TA	T	FRAME_SHIFT	HIGH	SASS6	normal_artifact;slippage	STR	92,9	56,17	0.063	0.232
chr1	100206309	TTA	T	DOWNSTREAM	MODIFIER	DBT	normal_artifact	.	105,12	93,26	0.056	0.192
chr1	100206310	TAAA	T,TA,AAAA	DOWNSTREAM	MODIFIER	DBT	germline;multiallelic;normal_artifact	.	54,11,44,2	43,9,54,6	0.083,0.409,0.025	0.079,0.479,0.053
chr1	100424280	AC	A	FRAME_SHIFT	HIGH	CDC14A	normal_artifact	STR	128,6	114,17	0.048	0.123
chr1	100424366	T	C	INTRON	MODIFIER	CDC14A	normal_artifact	.	119,2	92,17	0.024	0.16
chr1	100468266	T	C	INTRON	MODIFIER	CDC14A	PASS	.	22,0	25,12	0.042	0.333
chr1	101180245	C	T	INTERGENIC	MODIFIER		germline	.	8,0	0,3	0.1	0.8
chr1	102987802	G	GA	INTRON	MODIFIER	COL11A1	normal_artifact	STR	29,2	35,5	0.088	0.142
chr1	103005948	T	C	UPSTREAM	MODIFIER	COL11A1	normal_artifact	.	83,8	82,11	0.083	0.126
chr1	103575365	AT	A	UPSTREAM	MODIFIER	AMY2B	normal_artifact;slippage	STR	122,13	109,24	0.089	0.159
chr1	103620610	G	A	SYNONYMOUS_CODING	LOW	AMY2A	map_qual;normal_artifact	.	141,4	100,15	0.033	0.134
chr1	103754767	C	T	STOP_GAINED	HIGH	AMY1C	normal_artifact	.	258,25	230,27	0.089	0.107
chr1	106731034	AGGAGGAGGAGGAGG	A	INTERGENIC	MODIFIER		germline;weak_evidence	.	8,0	9,2	0.1	0.226
chr1	106853388	C	T	INTERGENIC	MODIFIER		weak_evidence	.	8,0	3,2	0.101	0.427
chr1	108807374	CT	C	INTRON	MODIFIER	STXBP3	normal_artifact;slippage;weak_evidence	STR	133,4	131,7	0.025	0.048
chr1	108912086	G	A	UPSTREAM	MODIFIER	GPSM2	weak_evidence	.	13,0	0,1	0.067	0.667
chr1	186087278	A	G	NON_SYNONYMOUS_CODING	MODERATE	HMCN1	PASS	.	109,0	125,35	0.008914	0.218
chr1	108992506	G	A	INTRON	MODIFIER	WDR47	PASS	.	85,0	98,5	0.011	0.057
chr1	109075181	CA	C,CAA	INTRON	MODIFIER	TAF13	germline;normal_artifact;slippage	STR	15,3,0	18,6,3	0.174,0.045	0.232,0.130
chr1	109090974	G	C	UPSTREAM	MODIFIER	RP5-1065J22.8	base_qual;clustered_events;haplotype;normal_artifact;strand_bias	.	118,4	151,6	0.025	0.037
chr1	109090980	T	C	UPSTREAM	MODIFIER	RP5-1065J22.8	base_qual;clustered_events;haplotype;normal_artifact;strand_bias	.	114,4	147,6	0.026	0.038
chr1	109090983	CAGCCCGG	C	UPSTREAM	MODIFIER	RP5-1065J22.8	clustered_events;haplotype;normal_artifact;weak_evidence	.	112,3	145,6	0.025	0.038
chr1	109113440	G	A	UPSTREAM	MODIFIER	C1orf194	PASS	.	26,1	25,9	0.039	0.257
chr1	201206340	T	C	NON_SYNONYMOUS_CODING	MODERATE	IGFN1	PASS	.	240,0	190,52	0.004097	0.216
chr1	109314223	G	T	INTRON	MODIFIER	SORT1	normal_artifact	.	51,5	45,11	0.08	0.202
chr1	109421935	TA	T	INTRON	MODIFIER	PSMA5	normal_artifact;slippage	STR	91,9	89,10	0.085	0.098
chr1	109490408	C	T	UPSTREAM	MODIFIER	CYB561D1	normal_artifact	.	144,11	182,10	0.076	0.056
chr1	109713126	C	T	SYNONYMOUS_CODING	LOW	GSTM5	map_qual;normal_artifact;strand_bias	.	146,7	170,10	0.051	0.056
chr1	109715937	C	A	UTR_3_PRIME	MODIFIER	GSTM5	normal_artifact	.	205,8	189,10	0.041	0.051
chr1	109737752	C	A	SPLICE_SITE_ACCEPTOR	HIGH	GSTM3	normal_artifact	.	52,2	37,6	0.04	0.156
chr1	109985283	C	T	UTR_5_PRIME	MODIFIER	AHCYL1	weak_evidence	.	62,0	55,3	0.015	0.066
chr1	110226256	TC	T	DOWNSTREAM	MODIFIER	KCNC4	normal_artifact	STR	132,7	146,18	0.042	0.092
chr1	110363804	CA	C	FRAME_SHIFT	HIGH	SLC16A4	normal_artifact;slippage	STR	92,9	88,13	0.078	0.121
chr1	110458289	G	A	UPSTREAM	MODIFIER	RP11-470L19.5	weak_evidence	.	9,0	3,1	0.091	0.334
chr1	110458300	G	A	UPSTREAM	MODIFIER	RP11-470L19.5	weak_evidence	.	10,0	2,2	0.083	0.499
chr1	111241410	G	T	SYNONYMOUS_CODING	LOW	CHI3L2	normal_artifact	.	153,13	150,11	0.082	0.067
chr1	111290960	AAT	A	DOWNSTREAM	MODIFIER	CHIAP2	slippage	STR	31,0	29,4	0.028	0.141
chr1	111503586	G	A	UTR_5_PRIME	MODIFIER	ADORA3	PASS	.	19,0	12,3	0.048	0.235
chr1	111649014	T	C	DOWNSTREAM	MODIFIER	RNU6-151P	normal_artifact	.	49,3	52,5	0.074	0.101
chr1	111760855	A	G	UTR_5_PRIME	MODIFIER	DDX20	normal_artifact	.	111,7	87,6	0.067	0.073
chr1	112653571	TTTTA	T	DOWNSTREAM	MODIFIER	CAPZA1	weak_evidence	.	22,0	23,4	0.041	0.171
chr1	112689066	A	G	NON_SYNONYMOUS_CODING	MODERATE	MOV10	normal_artifact	.	138,9	123,7	0.065	0.059
chr1	112714933	G	A	UTR_5_PRIME	MODIFIER	PPM1J	normal_artifact	.	106,7	90,16	0.069	0.155
chr1	112924197	C	T	UPSTREAM	MODIFIER	SLC16A1	normal_artifact	.	79,4	86,10	0.057	0.111
chr1	113580750	CT	C	UPSTREAM	MODIFIER	MTND5P20	normal_artifact	STR	51,2	41,10	0.044	0.205
chr1	113643729	AT	A	INTRON	MODIFIER	MAGI3	normal_artifact	STR	84,4	59,30	0.04	0.326
chr1	113711802	C	T	NON_SYNONYMOUS_CODING	MODERATE	PHTF1	normal_artifact	.	71,2	77,15	0.037	0.166
chr1	113768440	CA	C	UPSTREAM	MODIFIER	RSBN1	normal_artifact;slippage	STR	23,3	22,6	0.113	0.218
chr1	113777166	TA	T	INTRON	MODIFIER	RSBN1	normal_artifact;slippage;weak_evidence	STR	62,7	54,5	0.099	0.084
chr1	113899716	CA	C,CAA	UPSTREAM	MODIFIER	AP4B1	germline;multiallelic;normal_artifact;slippage	STR	52,20,6	65,18,9	0.244,0.072	0.194,0.105
chr1	114092311	ACTCT	A	DOWNSTREAM	MODIFIER	SYT6	germline;weak_evidence	STR	9,0	9,4	0.064	0.318
chr1	114421351	TA	T	INTRON	MODIFIER	TRIM33	germline;normal_artifact;slippage;weak_evidence	STR	19,1	7,3	0.091	0.324
chr1	114427987	C	T	INTRON	MODIFIER	TRIM33	normal_artifact	.	48,3	43,5	0.073	0.12
chr1	114677399	C	T	NON_SYNONYMOUS_CODING	MODERATE	AMPD1	normal_artifact	.	189,14	182,44	0.072	0.197
chr1	114718820	T	C	UPSTREAM	MODIFIER	NRAS	normal_artifact	.	131,13	128,21	0.09	0.145
chr1	114994979	G	GA	FRAME_SHIFT	HIGH	SYCP1	normal_artifact;slippage	STR	52,7	57,9	0.102	0.125
chr1	115482510	A	G	DOWNSTREAM	MODIFIER	RP4-663N10.3	weak_evidence	.	11,0	0,2	0.078	0.75
chr1	115651252	CT	C	UPSTREAM	MODIFIER	VANGL1	normal_artifact;slippage	STR	66,9	69,8	0.097	0.105
chr1	116035196	C	T	SYNONYMOUS_CODING	LOW	SLC22A15	normal_artifact	.	116,8	138,19	0.065	0.122
chr1	116275447	C	A	UPSTREAM	MODIFIER	U3	weak_evidence	.	8,0	1,2	0.1	0.599
chr1	117368556	CT	C	UPSTREAM	MODIFIER	RP11-188D8.1	normal_artifact;slippage	STR	40,4	26,5	0.088	0.181
chr1	117510430	C	A	INTRON	MODIFIER	MAN1A2	normal_artifact	.	63,5	44,6	0.084	0.134
chr1	117778709	T	A	UPSTREAM	MODIFIER	PNRC2P1	PASS	.	8,0	10,4	0.1	0.312
chr1	117906535	C	CT	FRAME_SHIFT	HIGH	GDAP2	normal_artifact	STR	68,5	54,13	0.069	0.183
chr1	117940729	GACA	G	DOWNSTREAM	MODIFIER	WDR3	slippage;weak_evidence	STR	21,0	27,2	0.042	0.095
chr1	117946163	T	C	NON_SYNONYMOUS_CODING	MODERATE	WDR3	normal_artifact	.	140,7	131,7	0.051	0.056
chr1	117950097	T	C	SYNONYMOUS_CODING	LOW	WDR3	normal_artifact	.	89,6	119,6	0.071	0.055
chr1	117992540	G	C	NON_SYNONYMOUS_CODING	MODERATE	SPAG17	normal_artifact	.	88,5	99,15	0.062	0.136
chr1	118884651	T	G	UTR_3_PRIME	MODIFIER	TBX15	normal_artifact	.	57,4	64,4	0.079	0.071
chr1	118884716	G	T	UTR_3_PRIME	MODIFIER	TBX15	normal_artifact	.	117,8	132,8	0.056	0.053
chr1	119034080	A	T	DOWNSTREAM	MODIFIER	WARS2	normal_artifact;weak_evidence	.	57,4	67,4	0.079	0.067
chr1	119747701	TCTC	T	DOWNSTREAM	MODIFIER	PHGDH	germline;slippage;weak_evidence	STR	11,0	10,3	0.075	0.261
chr1	119759138	AT	A	FRAME_SHIFT	HIGH	HMGCS2	PASS	STR	87,2	98,18	0.013	0.157
chr1	119923474	T	C	INTRON	MODIFIER	NOTCH2	normal_artifact	.	29,1	43,5	0.062	0.12
chr1	119948425	T	A	NON_SYNONYMOUS_CODING	MODERATE	NOTCH2	normal_artifact	.	82,6	68,11	0.077	0.147
chr1	215235108	C	T	NON_SYNONYMOUS_CODING	MODERATE	KCNK2	PASS	.	112,0	107,29	0.008687	0.216
chr1	120163401	A	G	INTRON	MODIFIER	SEC22B	map_qual;normal_artifact	.	21,2	26,19	0.096	0.425
chr1	120233304	A	G	INTRON	MODIFIER	CH17-472G23.1	map_qual;normal_artifact	.	94,8	76,6	0.086	0.082
chr1	120449170	G	A	INTRON	MODIFIER	NBPF8	normal_artifact	.	123,2	157,8	0.022	0.053
chr1	120449337	A	G	EXON	MODIFIER	NBPF8	clustered_events;normal_artifact	.	392,11	469,20	0.028	0.042
chr1	120449369	G	T	EXON	MODIFIER	NBPF8	clustered_events;map_qual;normal_artifact;strand_bias;weak_evidence	.	301,9	341,6	0.028	0.017
chr1	120449444	A	G	INTRON	MODIFIER	NBPF8	clustered_events;normal_artifact;weak_evidence	.	145,1	159,3	0.013	0.024
chr1	120449452	TTCTC	T	INTRON	MODIFIER	NBPF8	clustered_events;normal_artifact;weak_evidence	STR	124,1	134,3	0.015	0.029
chr1	120449493	T	G	INTRON	MODIFIER	NBPF8	clustered_events;haplotype;normal_artifact	.	73,1	71,3	0.026	0.052
chr1	120449501	T	C	INTRON	MODIFIER	NBPF8	clustered_events;haplotype;normal_artifact	.	64,1	64,3	0.03	0.058
chr1	120449504	TG	CA	INTRON	MODIFIER	NBPF8	clustered_events;normal_artifact;weak_evidence	.	64,1	61,3	0.03	0.061
chr1	120460742	C	T	INTRON	MODIFIER	NBPF8	map_qual;normal_artifact;weak_evidence	.	62,5	58,4	0.086	0.077
chr1	120491797	C	T	INTRON	MODIFIER	CH17-472G23.4	map_qual;normal_artifact	.	88,9	104,15	0.1	0.131
chr1	120491829	C	A	INTRON	MODIFIER	CH17-472G23.4	map_qual;normal_artifact;strand_bias	.	68,5	72,8	0.079	0.109
chr1	120664362	G	A	INTRON	MODIFIER	CH17-472G23.4	map_qual	.	10,0	10,3	0.084	0.269
chr1	120701202	A	G	EXON	MODIFIER	CH17-472G23.4	map_qual;normal_artifact;strand_bias	.	76,7	73,9	0.094	0.118
chr1	120701281	C	G	EXON	MODIFIER	CH17-472G23.4	map_qual;normal_artifact;strand_bias	.	130,13	128,19	0.096	0.133
chr1	120807620	T	C	SYNONYMOUS_CODING	LOW	NBPF26	haplotype;map_qual;normal_artifact;strand_bias	.	233,11	213,15	0.047	0.068
chr1	120807627	C	G	NON_SYNONYMOUS_CODING	MODERATE	NBPF26	haplotype;map_qual;normal_artifact	.	243,9	225,20	0.036	0.08
chr1	120809791	C	T	UPSTREAM	MODIFIER	NBPF26	clustered_events;map_qual;normal_artifact;strand_bias	.	352,9	348,11	0.026	0.032
chr1	120809980	A	G	UPSTREAM	MODIFIER	NBPF26	clustered_events;haplotype;map_qual;normal_artifact	.	239,5	242,12	0.024	0.05
chr1	120809984	C	T	UPSTREAM	MODIFIER	NBPF26	clustered_events;haplotype;map_qual;normal_artifact	.	233,5	237,12	0.025	0.051
chr1	120810541	C	T	NON_SYNONYMOUS_CODING	MODERATE	NBPF26	map_qual;normal_artifact	.	322,17	337,26	0.052	0.073
chr1	120812107	T	A	UPSTREAM	MODIFIER	NBPF26	clustered_events;normal_artifact;strand_bias	.	185,3	163,4	0.021	0.03
chr1	120812120	C	T	UPSTREAM	MODIFIER	NBPF26	clustered_events;normal_artifact;strand_bias	.	164,4	148,6	0.029	0.045
chr1	120812133	C	T	UPSTREAM	MODIFIER	NBPF26	clustered_events;haplotype;normal_artifact;strand_bias	.	145,5	129,7	0.039	0.058
chr1	120812136	G	T	UPSTREAM	MODIFIER	NBPF26	clustered_events;haplotype;normal_artifact;strand_bias	.	143,5	128,7	0.04	0.058
chr1	120812145	TTCTC	T	UPSTREAM	MODIFIER	NBPF26	clustered_events;normal_artifact	STR	131,6	105,7	0.05	0.07
chr1	120812198	G	A	UPSTREAM	MODIFIER	NBPF26	clustered_events;normal_artifact	.	73,7	55,10	0.095	0.162
chr1	120814068	C	T	INTRON	MODIFIER	NBPF26	map_qual;normal_artifact	.	132,7	115,11	0.056	0.093
chr1	120824058	T	C	SYNONYMOUS_CODING	LOW	NBPF26	normal_artifact	.	100,4	134,11	0.045	0.08
chr1	120825025	T	A	INTRON	MODIFIER	NBPF26	normal_artifact	.	24,1	22,3	0.073	0.148
chr1	120825299	CCT	C,CCTCT	INTRON	MODIFIER	NBPF26	germline;multiallelic;normal_artifact;slippage	STR	40,2,19	52,3,13	0.044,0.312	0.054,0.191
chr1	120825397	A	G	INTRON	MODIFIER	NBPF26	normal_artifact;weak_evidence	.	21,1	25,2	0.084	0.103
chr1	120830197	CCT	C,CCTCT	INTRON	MODIFIER	NBPF26	germline;map_qual;multiallelic;normal_artifact;slippage	STR	47,20,0	48,19,6	0.298,0.013	0.259,0.090
chr1	120830338	T	C	INTRON	MODIFIER	NBPF26	map_qual;normal_artifact	.	71,6	83,6	0.087	0.075
chr1	121097245	A	C	DOWNSTREAM	MODIFIER	FCGR1B	map_qual;normal_artifact;strand_bias;weak_evidence	.	97,2	116,4	0.029	0.04
chr1	121374786	TA	T	INTRON	MODIFIER	SRGAP2-AS1	normal_artifact;slippage	STR	122,9	93,12	0.077	0.112
chr1	124377185	G	C	INTERGENIC	MODIFIER		clustered_events;weak_evidence	.	8,0	42,4	0.1	0.099
chr1	124377221	T	G	INTERGENIC	MODIFIER		clustered_events;map_qual	.	9,0	60,3	0.092	0.061
chr1	124377249	A	G	INTERGENIC	MODIFIER		clustered_events;map_qual	.	9,0	61,5	0.091	0.088
chr1	124714928	C	G	INTERGENIC	MODIFIER		map_qual;weak_evidence	.	9,0	58,2	0.091	0.048
chr1	124714938	T	A	INTERGENIC	MODIFIER		map_qual	.	9,0	61,4	0.091	0.075
chr1	125178998	T	C	INTERGENIC	MODIFIER		clustered_events;weak_evidence	.	21,0	175,4	0.044	0.026
chr1	125179042	C	T	INTERGENIC	MODIFIER		clustered_events;map_qual;weak_evidence	.	21,0	147,7	0.043	0.048
chr1	125179053	G	T	INTERGENIC	MODIFIER		clustered_events;map_qual;weak_evidence	.	20,0	142,4	0.045	0.027
chr1	125179127	T	C	INTERGENIC	MODIFIER		haplotype;map_qual	.	10,0	85,5	0.083	0.064
chr1	125179145	C	G	INTERGENIC	MODIFIER		haplotype;map_qual	.	9,0	83,3	0.091	0.045
chr1	125179279	C	T	INTERGENIC	MODIFIER		clustered_events;map_qual;weak_evidence	.	17,0	155,7	0.053	0.046
chr1	125179288	TC	AC,AT	INTERGENIC	MODIFIER		clustered_events;map_qual;normal_artifact	.	15,2,0	147,15,4	0.149,0.050	0.093,0.029
chr1	125179343	C	T	INTERGENIC	MODIFIER		clustered_events;map_qual	.	11,0	125,16	0.075	0.117
chr1	125180067	G	A	INTERGENIC	MODIFIER		clustered_events;map_qual;normal_artifact	.	27,2	270,16	0.094	0.057
chr1	125180079	C	T	INTERGENIC	MODIFIER		clustered_events;normal_artifact	.	38,1	338,11	0.048	0.033
chr1	125180080	G	C	INTERGENIC	MODIFIER		clustered_events;normal_artifact	.	34,3	353,11	0.084	0.032
chr1	125180112	A	G	INTERGENIC	MODIFIER		clustered_events;normal_artifact	.	50,1	519,13	0.037	0.024
chr1	125180152	G	A	INTERGENIC	MODIFIER		clustered_events;normal_artifact	.	56,1	598,22	0.034	0.023
chr1	125180155	C	A	INTERGENIC	MODIFIER		clustered_events	.	58,0	623,12	0.017	0.019
chr1	125180184	G	C	INTERGENIC	MODIFIER		clustered_events;map_qual	.	64,0	659,11	0.015	0.014
chr1	125180186	T	A	INTERGENIC	MODIFIER		clustered_events;map_qual;normal_artifact	.	63,2	648,22	0.045	0.03
chr1	125180192	C	T	INTERGENIC	MODIFIER		clustered_events;normal_artifact	.	66,3	654,20	0.056	0.028
chr1	125180196	T	C	INTERGENIC	MODIFIER		clustered_events;haplotype	.	66,0	674,6	0.015	0.01
chr1	125180208	G	A	INTERGENIC	MODIFIER		clustered_events;map_qual;normal_artifact	.	59,2	636,31	0.047	0.045
chr1	125180209	T	A	INTERGENIC	MODIFIER		clustered_events;haplotype	.	61,0	666,6	0.016	0.01
chr1	125180212	TG	T	INTERGENIC	MODIFIER		clustered_events;haplotype;normal_artifact	.	60,2	674,10	0.047	0.015
chr1	125180222	C	T	INTERGENIC	MODIFIER		clustered_events	.	54,1	635,27	0.021	0.036
chr1	125180223	G	A	INTERGENIC	MODIFIER		clustered_events;haplotype	.	57,0	662,8	0.016	0.01
chr1	125180227	C	T	INTERGENIC	MODIFIER		clustered_events;weak_evidence	.	59,0	650,9	0.016	0.011
chr1	125180237	A	T	INTERGENIC	MODIFIER		clustered_events;haplotype;normal_artifact	.	55,2	639,9	0.051	0.015
chr1	125180244	C	T	INTERGENIC	MODIFIER		clustered_events;haplotype	.	57,0	628,9	0.017	0.012
chr1	125180250	A	T	INTERGENIC	MODIFIER		clustered_events;normal_artifact	.	54,1	600,19	0.035	0.031
chr1	125180258	C	T	INTERGENIC	MODIFIER		clustered_events;normal_artifact	.	55,1	586,12	0.033	0.02
chr1	125180281	A	T	INTERGENIC	MODIFIER		clustered_events;map_qual	.	52,0	593,13	0.019	0.021
chr1	125180305	T	G	INTERGENIC	MODIFIER		clustered_events;weak_evidence	.	51,0	569,15	0.018	0.021
chr1	125180330	G	A	INTERGENIC	MODIFIER		clustered_events;normal_artifact;weak_evidence	.	44,2	495,7	0.062	0.011
chr1	125180334	A	T	INTERGENIC	MODIFIER		clustered_events;haplotype	.	47,0	480,9	0.02	0.02
chr1	125180352	G	T	INTERGENIC	MODIFIER		clustered_events;normal_artifact	.	36,3	370,26	0.095	0.065
chr1	125180356	A	T	INTERGENIC	MODIFIER		clustered_events;haplotype	.	41,0	380,7	0.023	0.021
chr1	125180365	A	C	INTERGENIC	MODIFIER		clustered_events;normal_artifact	.	35,1	318,12	0.052	0.038
chr1	125180384	T	A	INTERGENIC	MODIFIER		clustered_events;normal_artifact	.	30,2	257,8	0.088	0.033
chr1	125180432	A	T	INTERGENIC	MODIFIER		clustered_events;map_qual;weak_evidence	.	27,0	166,5	0.035	0.033
chr1	125180483	G	C	INTERGENIC	MODIFIER		clustered_events;map_qual	.	18,0	98,10	0.05	0.098
chr1	125181529	T	G	INTERGENIC	MODIFIER		map_qual;weak_evidence	.	11,0	54,5	0.079	0.097
chr1	125181611	A	C	INTERGENIC	MODIFIER		map_qual	.	15,0	86,7	0.059	0.083
chr1	125182429	T	C	INTERGENIC	MODIFIER		clustered_events;map_qual;weak_evidence	.	18,0	80,2	0.05	0.036
chr1	125182471	GA	TT,TA	INTERGENIC	MODIFIER		clustered_events;map_qual;normal_artifact	.	20,3,0	104,9,2	0.153,0.038	0.084,0.025
chr1	125182485	T	A	INTERGENIC	MODIFIER		clustered_events;map_qual	.	24,0	104,7	0.038	0.068
chr1	125182490	A	T	INTERGENIC	MODIFIER		clustered_events;haplotype;map_qual	.	26,0	107,8	0.035	0.075
chr1	125182493	C	A	INTERGENIC	MODIFIER		clustered_events;map_qual;normal_artifact	.	26,1	101,16	0.067	0.138
chr1	125182500	GT	G	INTERGENIC	MODIFIER		clustered_events;haplotype;map_qual	STR	26,0	111,8	0.035	0.072
chr1	125182523	T	A	INTERGENIC	MODIFIER		clustered_events;map_qual;strand_bias;weak_evidence	.	29,0	141,3	0.032	0.027
chr1	125182531	A	T	INTERGENIC	MODIFIER		clustered_events;map_qual;normal_artifact;weak_evidence	.	30,1	145,4	0.059	0.032
chr1	125182553	TTCCATTCGGG	T	INTERGENIC	MODIFIER		clustered_events;map_qual;normal_artifact	.	34,1	189,9	0.054	0.05
chr1	125182627	A	T	INTERGENIC	MODIFIER		clustered_events;map_qual;normal_artifact	.	39,1	238,16	0.047	0.066
chr1	125182642	A	G	INTERGENIC	MODIFIER		clustered_events;map_qual;normal_artifact	.	33,1	229,16	0.055	0.069
chr1	125182646	G	C	INTERGENIC	MODIFIER		clustered_events;map_qual;weak_evidence	.	33,0	227,9	0.029	0.038
chr1	125182651	T	C	INTERGENIC	MODIFIER		clustered_events;map_qual	.	32,0	227,9	0.029	0.04
chr1	125182656	C	T	INTERGENIC	MODIFIER		clustered_events;map_qual;normal_artifact;weak_evidence	.	30,3	229,3	0.112	0.017
chr1	125183665	G	A	INTERGENIC	MODIFIER		clustered_events	.	17,0	111,7	0.052	0.066
chr1	125183680	T	C,A	INTERGENIC	MODIFIER		clustered_events;normal_artifact	.	12,0,5	136,3,4	0.048,0.300	0.026,0.034
chr1	125183701	G	A	INTERGENIC	MODIFIER		clustered_events;weak_evidence	.	20,0	163,3	0.045	0.023
chr1	125183750	G	A	INTERGENIC	MODIFIER		clustered_events;strand_bias;weak_evidence	.	20,0	182,4	0.045	0.026
chr1	125183824	G	T	INTERGENIC	MODIFIER		map_qual	.	9,0	90,8	0.091	0.089
chr1	125183835	A	G	INTERGENIC	MODIFIER		PASS	.	8,0	74,4	0.1	0.062
chr1	143193080	A	G	INTERGENIC	MODIFIER		haplotype;map_qual;strand_bias	.	17,0	52,4	0.053	0.086
chr1	143193082	C	G	INTERGENIC	MODIFIER		haplotype;map_qual;strand_bias	.	17,0	52,4	0.053	0.086
chr1	143213117	C	G	INTERGENIC	MODIFIER		clustered_events;map_qual	.	14,0	136,13	0.063	0.091
chr1	143213121	T	G	INTERGENIC	MODIFIER		clustered_events;map_qual;weak_evidence	.	14,0	159,3	0.063	0.024
chr1	143213144	G	A	INTERGENIC	MODIFIER		clustered_events;haplotype;map_qual;strand_bias	.	17,0	213,4	0.053	0.023
chr1	143213154	A	C	INTERGENIC	MODIFIER		clustered_events;map_qual;normal_artifact	.	17,1	215,26	0.099	0.109
chr1	143213164	G	C	INTERGENIC	MODIFIER		clustered_events;haplotype;map_qual;strand_bias	.	22,0	261,4	0.042	0.019
chr1	143213178	C	A	INTERGENIC	MODIFIER		clustered_events;map_qual;normal_artifact	.	23,2	278,24	0.109	0.076
chr1	143213182	C	T	INTERGENIC	MODIFIER		clustered_events;haplotype;map_qual;strand_bias	.	26,0	307,4	0.035	0.016
chr1	143213204	T	A	INTERGENIC	MODIFIER		clustered_events;map_qual;weak_evidence	.	34,0	392,5	0.027	0.014
chr1	143213206	G	C	INTERGENIC	MODIFIER		clustered_events;map_qual;weak_evidence	.	34,0	386,6	0.027	0.016
chr1	143213214	A	G	INTERGENIC	MODIFIER		clustered_events;map_qual;normal_artifact	.	32,2	379,10	0.083	0.025
chr1	143213240	A	G	INTERGENIC	MODIFIER		clustered_events;normal_artifact;weak_evidence	.	33,2	385,7	0.079	0.018
chr1	143213247	C	T,A	INTERGENIC	MODIFIER		clustered_events;map_qual;normal_artifact	.	26,6,1	331,38,5	0.193,0.053	0.102,0.013
chr1	143213300	G	A	INTERGENIC	MODIFIER		clustered_events;map_qual;strand_bias	.	25,0	260,4	0.037	0.019
chr1	143213316	A	C	INTERGENIC	MODIFIER		clustered_events;map_qual	.	19,0	204,9	0.048	0.042
chr1	143213339	A	T	INTERGENIC	MODIFIER		clustered_events;haplotype;map_qual	.	13,0	146,4	0.067	0.033
chr1	143213342	A	T	INTERGENIC	MODIFIER		clustered_events;haplotype;map_qual	.	12,0	137,4	0.071	0.035
chr1	143213350	TCT	AGG	INTERGENIC	MODIFIER		clustered_events;haplotype;map_qual	.	9,0	101,3	0.091	0.038
chr1	143214626	G	A	INTERGENIC	MODIFIER		map_qual	.	10,0	86,6	0.081	0.073
chr1	143214655	T	A	INTERGENIC	MODIFIER		normal_artifact	.	18,1	145,15	0.093	0.098
chr1	143214713	C	T	INTERGENIC	MODIFIER		clustered_events;normal_artifact	.	43,2	316,10	0.061	0.031
chr1	143214727	G	A	INTERGENIC	MODIFIER		clustered_events;haplotype;weak_evidence	.	48,0	339,3	0.02	0.012
chr1	143214731	G	T	INTERGENIC	MODIFIER		clustered_events;normal_artifact	.	46,2	333,12	0.06	0.037
chr1	143214736	C	T	INTERGENIC	MODIFIER		clustered_events;haplotype;weak_evidence	.	49,0	344,3	0.02	0.011
chr1	143214743	C	A	INTERGENIC	MODIFIER		clustered_events;weak_evidence	.	47,0	338,9	0.02	0.026
chr1	143214778	A	C	INTERGENIC	MODIFIER		clustered_events;haplotype;map_qual;normal_artifact	.	48,1	338,9	0.039	0.029
chr1	143214780	A	G	INTERGENIC	MODIFIER		clustered_events;haplotype;map_qual;normal_artifact	.	48,1	337,9	0.039	0.029
chr1	143214781	T	C	INTERGENIC	MODIFIER		clustered_events;normal_artifact	.	48,1	330,15	0.038	0.041
chr1	143214794	G	T	INTERGENIC	MODIFIER		clustered_events;map_qual;normal_artifact	.	40,3	287,21	0.088	0.068
chr1	143214815	CC	TC,AA	INTERGENIC	MODIFIER		clustered_events;map_qual;multiallelic;normal_artifact	.	38,1,1	229,17,9	0.046,0.045	0.069,0.035
chr1	143214851	G	C	INTERGENIC	MODIFIER		clustered_events;normal_artifact	.	20,1	125,11	0.086	0.087
chr1	143217266	C	A,T	INTERGENIC	MODIFIER		clustered_events;map_qual;multiallelic;normal_artifact	.	11,0,1	91,7,8	0.067,0.134	0.064,0.082
chr1	143217279	C	G	INTERGENIC	MODIFIER		clustered_events;map_qual;weak_evidence	.	15,0	128,5	0.059	0.042
chr1	143217293	G	A	INTERGENIC	MODIFIER		clustered_events;haplotype;map_qual;weak_evidence	.	15,0	161,3	0.059	0.024
chr1	143217300	G	A	INTERGENIC	MODIFIER		clustered_events;haplotype;map_qual;weak_evidence	.	16,0	174,3	0.053	0.022
chr1	143217318	C	T	INTERGENIC	MODIFIER		clustered_events;normal_artifact	.	20,1	198,17	0.086	0.082
chr1	143217319	G	C	INTERGENIC	MODIFIER		clustered_events;map_qual;normal_artifact	.	21,1	202,12	0.084	0.052
chr1	143217348	T	A	INTERGENIC	MODIFIER		clustered_events;haplotype;strand_bias;weak_evidence	.	25,0	219,3	0.037	0.018
chr1	143217358	A	C	INTERGENIC	MODIFIER		clustered_events;haplotype;strand_bias;weak_evidence	.	25,0	221,3	0.037	0.018
chr1	143217389	G	C	INTERGENIC	MODIFIER		clustered_events;strand_bias;weak_evidence	.	21,0	198,7	0.043	0.034
chr1	143217403	C	G	INTERGENIC	MODIFIER		clustered_events;map_qual	.	22,0	175,10	0.042	0.056
chr1	143217425	AA	CC	INTERGENIC	MODIFIER		clustered_events;haplotype;map_qual;weak_evidence	.	20,0	150,3	0.045	0.026
chr1	143217430	T	A	INTERGENIC	MODIFIER		clustered_events;haplotype;map_qual;weak_evidence	.	19,0	144,3	0.048	0.027
chr1	143217441	C	T	INTERGENIC	MODIFIER		clustered_events;weak_evidence	.	19,0	122,6	0.048	0.051
chr1	143217452	A	G	INTERGENIC	MODIFIER		clustered_events;map_qual;normal_artifact;strand_bias	.	16,1	102,8	0.102	0.079
chr1	143231440	G	A	INTERGENIC	MODIFIER		clustered_events;map_qual	.	10,0	105,6	0.083	0.052
chr1	143231444	C	T	INTERGENIC	MODIFIER		clustered_events;haplotype;map_qual;weak_evidence	.	10,0	114,2	0.083	0.025
chr1	143231455	A	T	INTERGENIC	MODIFIER		clustered_events;haplotype;map_qual;weak_evidence	.	10,0	118,2	0.083	0.025
chr1	143231462	G	A	INTERGENIC	MODIFIER		clustered_events;haplotype;map_qual;weak_evidence	.	10,0	121,2	0.081	0.024
chr1	143231477	C	G	INTERGENIC	MODIFIER		haplotype;map_qual	.	10,0	109,3	0.083	0.035
chr1	143231484	T	A	INTERGENIC	MODIFIER		haplotype;map_qual	.	10,0	109,3	0.083	0.035
chr1	143253009	C	A	INTERGENIC	MODIFIER		clustered_events	.	13,0	37,4	0.067	0.115
chr1	143253125	T	C	INTERGENIC	MODIFIER		clustered_events;haplotype;weak_evidence	.	15,0	94,2	0.059	0.031
chr1	143253158	C	T	INTERGENIC	MODIFIER		clustered_events;haplotype;weak_evidence	.	11,0	73,2	0.077	0.039
chr1	143264604	A	T	INTERGENIC	MODIFIER		strand_bias	.	10,0	103,6	0.083	0.062
chr1	143264608	GATGGAAACGAATGGAATCATCATCGA	G	INTERGENIC	MODIFIER		PASS	.	11,0	149,7	0.077	0.05
chr1	143499027	G	C,A	UPSTREAM	MODIFIER	CH17-13I23.1	germline;multiallelic;normal_artifact	.	139,53,3	128,64,7	0.271,0.016	0.322,0.034
chr1	143599982	A	G	EXON	MODIFIER	NBPF17P	normal_artifact	.	164,8	167,28	0.05	0.144
chr1	143607460	G	A	INTRON	MODIFIER	NBPF17P	weak_evidence	.	13,0	12,2	0.067	0.186
chr1	143766459	C	T	UPSTREAM	MODIFIER	FAM91A3P	normal_artifact	.	34,1	26,7	0.053	0.219
chr1	143766602	C	T	EXON	MODIFIER	FAM91A3P	map_qual;normal_artifact	.	68,6	72,8	0.092	0.103
chr1	143883609	G	A	DOWNSTREAM	MODIFIER	FCGR1CP	map_qual;normal_artifact;weak_evidence	.	32,2	21,3	0.082	0.153
chr1	143884776	G	T	DOWNSTREAM	MODIFIER	FCGR1CP	map_qual;normal_artifact;strand_bias	.	67,6	66,6	0.093	0.094
chr1	143885048	G	T	DOWNSTREAM	MODIFIER	FCGR1CP	normal_artifact	.	103,3	100,17	0.035	0.147
chr1	143904429	T	C	UPSTREAM	MODIFIER	RP5-998N21.7	map_qual;normal_artifact;strand_bias	.	423,19	454,16	0.044	0.034
chr1	144423381	TAAA	T,TA,TAAAA	UPSTREAM	MODIFIER	RP11-763B22.4	germline;normal_artifact	STR	20,5,17,1	16,3,16,3	0.129,0.381,0.041	0.092,0.408,0.092
chr1	144436925	T	C	NON_SYNONYMOUS_CODING	MODERATE	NBPF15	map_qual;normal_artifact;strand_bias	.	197,5	202,9	0.028	0.042
chr1	144436988	C	A	NON_SYNONYMOUS_CODING	MODERATE	NBPF15	map_qual;normal_artifact;strand_bias	.	333,16	365,18	0.047	0.048
chr1	144437787	T	C	UPSTREAM	MODIFIER	PFN1P6	clustered_events;map_qual;normal_artifact;weak_evidence	.	82,2	73,4	0.034	0.062
chr1	144437860	TA	CC	UPSTREAM	MODIFIER	PFN1P6	clustered_events;haplotype;map_qual;normal_artifact;weak_evidence	.	199,2	237,3	0.015	0.017
chr1	144437863	C	T	UPSTREAM	MODIFIER	PFN1P6	clustered_events;haplotype;map_qual;normal_artifact;weak_evidence	.	202,2	240,3	0.015	0.016
chr1	144437870	A	T	UPSTREAM	MODIFIER	PFN1P6	clustered_events;haplotype;map_qual;normal_artifact;weak_evidence	.	215,2	250,3	0.014	0.016
chr1	144437887	C	T	UPSTREAM	MODIFIER	PFN1P6	clustered_events;map_qual;normal_artifact;weak_evidence	.	224,2	279,3	0.013	0.014
chr1	144438017	A	G	NON_SYNONYMOUS_CODING	MODERATE	NBPF15	map_qual;normal_artifact;strand_bias	.	214,13	295,10	0.058	0.035
chr1	144905217	G	A	SYNONYMOUS_CODING	LOW	SRGAP2B	map_qual;normal_artifact	.	200,6	233,9	0.033	0.039
chr1	144914716	C	T	START_LOST	HIGH	SRGAP2B	map_qual;normal_artifact;weak_evidence	.	44,3	41,4	0.08	0.104
chr1	145403340	T	C	UPSTREAM	MODIFIER	NBPF20	clustered_events;map_qual;normal_artifact;strand_bias	.	188,10	251,11	0.054	0.044
chr1	145403381	T	C	UPSTREAM	MODIFIER	NBPF20	clustered_events;map_qual;normal_artifact	.	176,10	206,13	0.057	0.061
chr1	145403401	C	T	UPSTREAM	MODIFIER	NBPF20	clustered_events;map_qual;normal_artifact;strand_bias;weak_evidence	.	171,3	185,5	0.021	0.03
chr1	145403477	C	A	UPSTREAM	MODIFIER	NBPF20	clustered_events;map_qual;normal_artifact;strand_bias	.	102,8	98,10	0.079	0.099
chr1	145405250	C	A	NON_SYNONYMOUS_CODING	MODERATE	NBPF20	normal_artifact	.	193,4	314,8	0.02	0.027
chr1	145513198	C	T	DOWNSTREAM	MODIFIER	CH17-262O2.2	PASS	.	61,2	62,46	0.046	0.424
chr1	145518519	G	A	EXON	MODIFIER	CH17-262O2.1	clustered_events;normal_artifact;strand_bias	.	41,3	115,4	0.073	0.041
chr1	145518602	G	T	INTRON	MODIFIER	CH17-262O2.1	clustered_events;normal_artifact	.	47,4	108,6	0.092	0.057
chr1	145518676	G	A	INTRON	MODIFIER	CH17-262O2.1	clustered_events;haplotype;normal_artifact;strand_bias	.	94,4	173,7	0.05	0.044
chr1	145518680	T	G	INTRON	MODIFIER	CH17-262O2.1	clustered_events;haplotype;normal_artifact;strand_bias	.	96,4	175,7	0.049	0.043
chr1	145574752	T	C	INTRON	MODIFIER	NBPF25P	map_qual;normal_artifact	.	121,9	177,16	0.069	0.076
chr1	145574884	T	A	EXON	MODIFIER	NBPF25P	map_qual;normal_artifact;strand_bias	.	48,2	72,6	0.056	0.087
chr1	145849514	GC	G	FRAME_SHIFT	HIGH	PIAS3	normal_artifact	STR	152,12	223,37	0.075	0.135
chr1	145876054	AAC	A	INTRON	MODIFIER	ANKRD35	normal_artifact;slippage	STR	162,8	269,17	0.052	0.058
chr1	145903002	GACAC	G,GAC	DOWNSTREAM	MODIFIER	ITGA10	normal_artifact	STR	94,0,8	177,3,14	7.967e-03,0.079	0.019,0.070
chr1	145903024	TACACAC	T,TAC,TACAC,TACACACAC	DOWNSTREAM	MODIFIER	ITGA10	germline;multiallelic;normal_artifact	STR	5,12,42,17,4	16,19,45,53,6	0.130,0.516,0.214,0.059	0.119,0.323,0.383,0.050
chr1	145907100	TC	T	FRAME_SHIFT	HIGH	ITGA10	PASS	STR	113,3	118,85	0.017	0.422
chr1	146121874	C	T	INTRON	MODIFIER	NBPF10	normal_artifact	.	34,2	73,9	0.079	0.1
chr1	146121959	G	C	INTRON	MODIFIER	NBPF10	strand_bias	.	17,0	38,5	0.052	0.134
chr1	146136268	TA	CC	INTRON	MODIFIER	NBPF10	clustered_events;haplotype;map_qual;normal_artifact;strand_bias	.	167,8	226,16	0.051	0.07
chr1	146136271	C	T	INTRON	MODIFIER	NBPF10	clustered_events;haplotype;map_qual;normal_artifact;strand_bias	.	170,8	228,16	0.05	0.069
chr1	146136278	G	T	INTRON	MODIFIER	NBPF10	clustered_events;map_qual;normal_artifact;strand_bias	.	170,8	233,21	0.05	0.084
chr1	146136295	C	T	INTRON	MODIFIER	NBPF10	clustered_events;haplotype;map_qual;normal_artifact;strand_bias	.	195,10	241,27	0.053	0.101
chr1	146228812	CGCG	C	UTR_5_PRIME	MODIFIER	NOTCH2NL	normal_artifact	.	241,2	518,9	0.011	0.018
chr1	146644037	G	A	INTRON	MODIFIER	HYDIN2	map_qual;normal_artifact	.	27,1	14,4	0.067	0.25
chr1	146881433	C	T	EXON	MODIFIER	HYDIN2	map_qual;normal_artifact	.	274,16	293,37	0.057	0.111
chr1	146963189	G	C	NON_SYNONYMOUS_CODING	MODERATE	NBPF12	map_qual;normal_artifact;strand_bias	.	205,4	204,10	0.019	0.05
chr1	146964453	A	T	INTRON	MODIFIER	NBPF12	normal_artifact	.	307,7	301,14	0.02	0.045
chr1	146964485	A	G	INTRON	MODIFIER	NBPF12	normal_artifact	.	257,6	257,14	0.021	0.05
chr1	146964580	A	G	INTRON	MODIFIER	NBPF12	haplotype;map_qual;normal_artifact	.	57,2	70,5	0.049	0.078
chr1	146964589	A	G	INTRON	MODIFIER	NBPF12	haplotype;map_qual;normal_artifact	.	50,2	61,5	0.056	0.088
chr1	146968574	G	A	INTRON	MODIFIER	NBPF12	map_qual;normal_artifact;strand_bias	.	245,14	275,21	0.054	0.073
chr1	146984802	C	T	INTRON	MODIFIER	NBPF12	clustered_events;normal_artifact	.	214,19	215,21	0.084	0.091
chr1	146984876	T	G	NON_SYNONYMOUS_CODING	MODERATE	NBPF12	clustered_events;normal_artifact	.	337,16	348,18	0.044	0.047
chr1	146984882	A	G	SYNONYMOUS_CODING	LOW	NBPF12	clustered_events;normal_artifact	.	346,6	356,9	0.02	0.024
chr1	146984913	T	C	NON_SYNONYMOUS_CODING	MODERATE	NBPF12	clustered_events;map_qual;normal_artifact;strand_bias	.	369,9	349,11	0.026	0.03
chr1	146985528	CA	C	INTRON	MODIFIER	NBPF12	map_qual;normal_artifact	STR	585,35	610,36	0.049	0.049
chr1	146985566	C	T	INTRON	MODIFIER	NBPF12	map_qual;normal_artifact	.	752,13	794,21	0.015	0.025
chr1	146985824	G	C	INTRON	MODIFIER	NBPF12	normal_artifact;strand_bias;weak_evidence	.	638,22	633,8	0.034	0.013
chr1	146985977	G	A	INTRON	MODIFIER	NBPF12	normal_artifact	.	249,23	283,39	0.086	0.121
chr1	146986564	C	T	INTRON	MODIFIER	NBPF12	normal_artifact	.	338,11	384,17	0.032	0.043
chr1	146988604	C	T	INTRON	MODIFIER	NBPF12	map_qual;normal_artifact;weak_evidence	.	79,1	69,4	0.024	0.065
chr1	146989340	G	A	INTRON	MODIFIER	NBPF12	normal_artifact	.	32,2	35,3	0.081	0.1
chr1	146989753	A	T	INTRON	MODIFIER	NBPF12	clustered_events;normal_artifact	.	1932,58	1949,49	0.028	0.023
chr1	146989803	T	C	INTRON	MODIFIER	NBPF12	clustered_events;haplotype;normal_artifact	.	1294,30	1235,32	0.023	0.025
chr1	146989809	T	C	INTRON	MODIFIER	NBPF12	clustered_events;haplotype;normal_artifact	.	1301,30	1238,33	0.023	0.026
chr1	146989958	C	A	INTRON	MODIFIER	NBPF12	map_qual;normal_artifact;weak_evidence	.	96,6	68,4	0.066	0.067
chr1	146990899	CCT	C	INTRON	MODIFIER	NBPF12	map_qual;normal_artifact;slippage	STR	22,1	16,5	0.076	0.261
chr1	146991505	G	A	INTRON	MODIFIER	NBPF12	map_qual;normal_artifact;strand_bias;weak_evidence	.	250,6	241,7	0.023	0.031
chr1	147077985	GA	G	UPSTREAM	MODIFIER	RNVU1-8	normal_artifact	STR	81,1	91,11	0.024	0.098
chr1	147619694	A	AC	DOWNSTREAM	MODIFIER	BCL9	normal_artifact;slippage;weak_evidence	STR	183,19	319,10	0.069	0.021
chr1	147670165	A	G	UTR_5_PRIME	MODIFIER	ACP6	normal_artifact	.	24,1	59,6	0.074	0.105
chr1	148107758	A	G	SYNONYMOUS_CODING	LOW	NBPF11	normal_artifact;strand_bias;weak_evidence	.	302,4	315,4	0.015	0.015
chr1	148110169	T	C	INTRON	MODIFIER	NBPF11	PASS	.	11,0	34,6	0.077	0.166
chr1	148117798	C	T	INTRON	MODIFIER	NBPF11	map_qual	.	22,0	39,7	0.042	0.165
chr1	148117837	C	T	INTRON	MODIFIER	NBPF11	map_qual	.	13,0	22,6	0.065	0.232
chr1	148125000	C	G	NON_SYNONYMOUS_CODING	MODERATE	NBPF11	map_qual;normal_artifact	.	190,23	341,55	0.107	0.136
chr1	148535220	A	G	INTRON	MODIFIER	NBPF14	normal_artifact	.	33,1	50,9	0.055	0.163
chr1	148535265	G	C	INTRON	MODIFIER	NBPF14	normal_artifact	.	43,1	65,9	0.043	0.13
chr1	148536001	C	T	INTRON	MODIFIER	NBPF14	map_qual;normal_artifact	.	42,4	93,5	0.102	0.059
chr1	148536195	C	T	INTRON	MODIFIER	NBPF14	normal_artifact	.	69,4	125,5	0.066	0.044
chr1	148575914	A	T	INTRON	MODIFIER	NBPF14	PASS	.	16,0	14,3	0.056	0.209
chr1	148576077	T	C	INTRON	MODIFIER	NBPF14	strand_bias	.	16,0	42,4	0.056	0.104
chr1	148576128	T	C	INTRON	MODIFIER	NBPF14	strand_bias;weak_evidence	.	19,0	42,3	0.048	0.085
chr1	148585226	A	G	INTRON	MODIFIER	NBPF14	normal_artifact	.	193,12	226221	0.057	0.493
chr1	148586409	C	T	SYNONYMOUS_CODING	LOW	NBPF14	map_qual;normal_artifact;strand_bias	.	144,11	263,20	0.072	0.068
chr1	148586447	C	T	NON_SYNONYMOUS_CODING	MODERATE	NBPF14	map_qual;normal_artifact;strand_bias	.	127,15	265,18	0.109	0.065
chr1	148591335	C	T	INTRON	MODIFIER	NBPF14	map_qual;normal_artifact;strand_bias	.	103,6	167,14	0.062	0.081
chr1	148593582	T	A	INTRON	MODIFIER	NBPF14	map_qual;normal_artifact;strand_bias;weak_evidence	.	131,4	251,14	0.029	0.038
chr1	148593719	G	A	UPSTREAM	MODIFIER	NBPF14	map_qual;strand_bias;weak_evidence	.	88,0	209,7	0.011	0.035
chr1	148931874	C	G	NON_SYNONYMOUS_CODING	MODERATE	PDE4DIP	normal_artifact	.	203,13	179,73	0.061	0.291
chr1	148953097	C	T	NON_SYNONYMOUS_CODING	MODERATE	PDE4DIP	map_qual;normal_artifact;strand_bias	.	209,13	352,19	0.062	0.053
chr1	148967683	G	T	INTRON	MODIFIER	PDE4DIP	PASS	.	55,1	83,4	0.018	0.056
chr1	149003572	A	T	UPSTREAM	MODIFIER	PDE4DIP	PASS	.	181,0	213,10	0.005398	0.044
chr1	149005097	A	G	NON_SYNONYMOUS_CODING	MODERATE	PDE4DIP	map_qual;normal_artifact;strand_bias;weak_evidence	.	171,6	298,7	0.037	0.025
chr1	149009712	A	G	SYNONYMOUS_CODING	LOW	PDE4DIP	map_qual;normal_artifact;strand_bias	.	126,3	213,7	0.03	0.036
chr1	149020967	T	C	UPSTREAM	MODIFIER	PDE4DIP	normal_artifact	.	66,5	137,7	0.082	0.054
chr1	149063776	C	T	NON_SYNONYMOUS_CODING	MODERATE	NBPF9	map_qual;normal_artifact;strand_bias;weak_evidence	.	36,3	75,5	0.095	0.071
chr1	149065432	A	C	INTRON	MODIFIER	NBPF9	map_qual;normal_artifact	.	153,8	228,17	0.054	0.071
chr1	149071689	A	G	INTRON	MODIFIER	NBPF9	map_qual;normal_artifact;strand_bias	.	200,1	367,16	0.009798	0.041
chr1	149071703	A	G	INTRON	MODIFIER	NBPF9	map_qual;normal_artifact;strand_bias	.	167,11	321,18	0.066	0.055
chr1	149075573	T	A	INTRON	MODIFIER	NBPF9	clustered_events;normal_artifact	.	71,1	148,5	0.027	0.039
chr1	149075594	C	T	INTRON	MODIFIER	NBPF9	clustered_events;normal_artifact;strand_bias	.	97,2	187,7	0.03	0.04
chr1	149075614	G	A	INTRON	MODIFIER	NBPF9	clustered_events;map_qual;normal_artifact;strand_bias	.	109,6	235,18	0.059	0.074
chr1	149075617	G	A	INTRON	MODIFIER	NBPF9	clustered_events;map_qual;normal_artifact;strand_bias	.	123,1	259,9	0.016	0.033
chr1	149075662	G	C	NON_SYNONYMOUS_CODING	MODERATE	NBPF9	clustered_events;map_qual;normal_artifact	.	180,16	399,32	0.084	0.073
chr1	149075708	T	C	NON_SYNONYMOUS_CODING	MODERATE	NBPF9	clustered_events;map_qual;normal_artifact	.	215,20	427,35	0.086	0.074
chr1	149075770	G	C	NON_SYNONYMOUS_CODING	MODERATE	NBPF9	clustered_events;map_qual;normal_artifact;strand_bias	.	198,5	392,16	0.028	0.041
chr1	149077757	C	G	UPSTREAM	MODIFIER	NBPF9	map_qual;strand_bias	.	113,1	212,5	0.015	0.027
chr1	149080154	C	G	NON_SYNONYMOUS_CODING	MODERATE	NBPF9	map_qual;normal_artifact;strand_bias	.	103,9	174,15	0.086	0.083
chr1	149176002	CCTT	C	UPSTREAM	MODIFIER	CH17-189H20.1	weak_evidence	.	14,0	15,2	0.063	0.156
chr1	149177158	AT	A	INTRON	MODIFIER	CH17-189H20.1	map_qual;normal_artifact;weak_evidence	STR	50,3	65,4	0.073	0.065
chr1	149197768	C	T	DOWNSTREAM	MODIFIER	WI2-1896O14.1	map_qual;normal_artifact;strand_bias;weak_evidence	.	78,5	127,5	0.07	0.044
chr1	149240552	G	A	INTRON	MODIFIER	CH17-189H20.1	map_qual;normal_artifact	.	63,2	113,11	0.042	0.084
chr1	149475900	C	T	UTR_5_PRIME	MODIFIER	NBPF19	map_qual;normal_artifact;weak_evidence	.	72,4	93,5	0.063	0.059
chr1	149475995	C	T	SYNONYMOUS_CODING	LOW	NBPF19	clustered_events;haplotype;map_qual;normal_artifact;strand_bias	.	308,7	428,6	0.025	0.016
chr1	149476000	C	A	NON_SYNONYMOUS_CODING	MODERATE	NBPF19	clustered_events;haplotype;map_qual;normal_artifact;strand_bias	.	318,13	444,8	0.042	0.02
chr1	149476006	G	A	NON_SYNONYMOUS_CODING	MODERATE	NBPF19	clustered_events;haplotype;map_qual;normal_artifact;strand_bias	.	328,14	459,8	0.043	0.019
chr1	149633097	C	T	UPSTREAM	MODIFIER	LINC00869	PASS	.	8,0	3,2	0.101	0.429
chr1	149633109	T	C	UPSTREAM	MODIFIER	LINC00869	PASS	.	8,0	4,2	0.097	0.373
chr1	149812045	G	A	SYNONYMOUS_CODING	LOW	HIST2H2BF	map_qual;normal_artifact;strand_bias	.	447,44	546,35	0.091	0.06
chr1	149910510	C	T	INTRON	MODIFIER	SV2A	PASS	.	24,0	30,7	0.038	0.205
chr1	150076063	AATAT	A,AAT,AATATAT	UPSTREAM	MODIFIER	VPS45	multiallelic;normal_artifact	STR	9,0,5,1	14,3,3,5	0.050,0.318,0.105	0.136,0.139,0.203
chr1	150081990	A	G	NON_SYNONYMOUS_CODING	MODERATE	VPS45	normal_artifact	.	42,2	43,5	0.065	0.12
chr1	150283838	A	C	NON_SYNONYMOUS_CODING	MODERATE	CIART	base_qual;strand_bias;weak_evidence	.	95,1	82,13	0.011	0.089
chr1	150302735	C	G	INTRON	MODIFIER	MRPS21	normal_artifact	.	108,2	101,14	0.024	0.126
chr1	150311530	G	A	DOWNSTREAM	MODIFIER	MRPS21	weak_evidence	.	35,0	30,2	0.027	0.088
chr1	150470622	A	G	SYNONYMOUS_CODING	LOW	RPRD2	normal_artifact	.	105,8	117,22	0.078	0.162
chr1	150550992	A	AT	UPSTREAM	MODIFIER	ADAMTSL4	slippage;strand_bias;weak_evidence	STR	154,1	187,6	0.012	0.032
chr1	150714556	CA	C	INTRON	MODIFIER	HORMAD1	normal_artifact;slippage;weak_evidence	STR	35,1	43,3	0.053	0.084
chr1	150812032	AG	A	FRAME_SHIFT	HIGH	ARNT	normal_artifact;weak_evidence	STR	105,11	116,13	0.098	0.077
chr1	150816359	G	GA	FRAME_SHIFT	HIGH	ARNT	normal_artifact	STR	59,2	56,11	0.031	0.168
chr1	150853281	CA	C	INTRON	MODIFIER	ARNT	normal_artifact;slippage	STR	32,2	48,14	0.068	0.221
chr1	150969110	G	A	UTR_5_PRIME	MODIFIER	CERS2	normal_artifact	.	95,8	80,14	0.084	0.156
chr1	151000083	CT	C,CTT	DOWNSTREAM	MODIFIER	ANXA9	germline;normal_artifact	STR	18,35,0	11,34,5	0.650,0.017	0.687,0.113
chr1	151246901	AT	A	INTRON	MODIFIER	PIP5K1A	normal_artifact;slippage	STR	135,8	145,18	0.045	0.08
chr1	151287154	A	G	NON_SYNONYMOUS_CODING	MODERATE	ZNF687	normal_artifact	.	604,57	605110	0.086	0.152
chr1	151365570	G	A	NON_SYNONYMOUS_CODING	MODERATE	SELENBP1	normal_artifact	.	170,13	153,47	0.074	0.236
chr1	151376409	A	G	UPSTREAM	MODIFIER	SELENBP1	weak_evidence	.	8,0	2,1	0.1	0.4
chr1	151408022	AAAAAAAAAAG	A	INTRON	MODIFIER	POGZ	normal_artifact;weak_evidence	.	32,4	37,5	0.114	0.125
chr1	151529482	CG	C	UPSTREAM	MODIFIER	CGN	normal_artifact	STR	107,6	112,12	0.038	0.099
chr1	151564140	A	G	UPSTREAM	MODIFIER	TUFT1	normal_artifact	.	84,7	87,8	0.084	0.092
chr1	151714491	T	G	UTR_5_PRIME	MODIFIER	RIIAD1	base_qual;strand_bias	.	196,2	208,23	0.00527	0.063
chr1	151760903	CAAAAA	C,CA,CAAA,CAAAAAA	UPSTREAM	MODIFIER	RP11-98D18.2	germline;multiallelic;normal_artifact;weak_evidence	STR	6,4,8,10,1	3,13,10,8,5	0.086,0.283,0.464,0.027	0.246,0.284,0.260,0.129
chr1	151831702	A	T	INTRON	MODIFIER	RORC	normal_artifact	.	258,18	249,22	0.067	0.083
chr1	151831729	T	G	SYNONYMOUS_CODING	LOW	RORC	base_qual;strand_bias	.	238,1	203,25	0.004176	0.072
chr1	151838160	A	C	NON_SYNONYMOUS_CODING	MODERATE	C2CD4D	base_qual;normal_artifact;strand_bias	.	283,29	320,36	0.045	0.048
chr1	151838187	A	C	NON_SYNONYMOUS_CODING	MODERATE	C2CD4D	base_qual;normal_artifact;strand_bias	.	237,13	257,34	0.017	0.05
chr1	152021390	G	A	INTRON	MODIFIER	AL591893.1	normal_artifact	.	62,4	81,8	0.073	0.098
chr1	152036888	G	A	INTRON	MODIFIER	S100A11	normal_artifact	.	126,3	167,7	0.031	0.044
chr1	152110480	GCTC	G	CODON_DELETION	MODERATE	TCHH	normal_artifact;slippage	STR	309,1	403,8	0.006196	0.021
chr1	152214046	T	C	NON_SYNONYMOUS_CODING	MODERATE	HRNR	map_qual;normal_artifact	.	468,24	448,27	0.048	0.058
chr1	152214232	C	T	NON_SYNONYMOUS_CODING	MODERATE	HRNR	map_qual;normal_artifact	.	1192,59	1411,97	0.046	0.063
chr1	152214326	T	C	NON_SYNONYMOUS_CODING	MODERATE	HRNR	clustered_events;map_qual;normal_artifact;strand_bias	.	1722,62	2164,61	0.034	0.027
chr1	152214361	C	T	NON_SYNONYMOUS_CODING	MODERATE	HRNR	clustered_events;map_qual;normal_artifact	.	1702152	2076208	0.08	0.09
chr1	152214433	C	T	NON_SYNONYMOUS_CODING	MODERATE	HRNR	clustered_events;map_qual;normal_artifact;strand_bias	.	1699,36	1970,51	0.02	0.024
chr1	152214723	G	A	SYNONYMOUS_CODING	LOW	HRNR	map_qual;normal_artifact	.	1338,82	1449,81	0.057	0.052
chr1	152215112	C	T	NON_SYNONYMOUS_CODING	MODERATE	HRNR	map_qual;normal_artifact	.	1244,82	1476,94	0.061	0.058
chr1	152215736	C	T	NON_SYNONYMOUS_CODING	MODERATE	HRNR	map_qual;normal_artifact;strand_bias;weak_evidence	.	1482,12	1701,15	0.007624	0.007864
chr1	152215843	C	T	NON_SYNONYMOUS_CODING	MODERATE	HRNR	normal_artifact	.	783,34	944,38	0.04	0.039
chr1	152215938	G	A	SYNONYMOUS_CODING	LOW	HRNR	normal_artifact	.	1039,82	1172,79	0.072	0.063
chr1	152216133	G	A	SYNONYMOUS_CODING	LOW	HRNR	map_qual;normal_artifact	.	1235127	1270109	0.091	0.078
chr1	152216293	C	T	NON_SYNONYMOUS_CODING	MODERATE	HRNR	map_qual;normal_artifact	.	767,54	695,42	0.065	0.056
chr1	152216485	C	T	NON_SYNONYMOUS_CODING	MODERATE	HRNR	clustered_events;map_qual;normal_artifact	.	1251101	1333117	0.071	0.078
chr1	152216488	C	T	NON_SYNONYMOUS_CODING	MODERATE	HRNR	clustered_events;map_qual;normal_artifact	.	1224,77	1335,76	0.058	0.052
chr1	152216575	G	A	NON_SYNONYMOUS_CODING	MODERATE	HRNR	clustered_events;map_qual;normal_artifact	.	732,48	785,43	0.06	0.051
chr1	152311173	T	C	NON_SYNONYMOUS_CODING	MODERATE	FLG	normal_artifact	.	1013,86	1192103	0.077	0.077
chr1	152314522	T	C	NON_SYNONYMOUS_CODING	MODERATE	FLG	normal_artifact	.	103,7	92,18	0.065	0.165
chr1	152357218	A	G	NON_SYNONYMOUS_CODING	MODERATE	FLG2	normal_artifact	.	190,5	194,42	0.026	0.179
chr1	152399517	A	C	UPSTREAM	MODIFIER	HMGN3P1	clustered_events;haplotype;weak_evidence	.	113,0	122,2	0.008631	0.024
chr1	152399520	T	C	UPSTREAM	MODIFIER	HMGN3P1	clustered_events;haplotype	.	113,0	123,3	0.008696	0.031
chr1	152399538	C	T	UPSTREAM	MODIFIER	HMGN3P1	clustered_events;haplotype	.	106,0	118,4	0.009259	0.04
chr1	152399559	A	T	UPSTREAM	MODIFIER	HMGN3P1	clustered_events	.	107,0	116,6	0.009147	0.057
chr1	152399571	C	T	UPSTREAM	MODIFIER	HMGN3P1	clustered_events;haplotype	.	107,0	111,6	0.009139	0.059
chr1	152399574	C	T	UPSTREAM	MODIFIER	HMGN3P1	clustered_events;haplotype	.	106,0	113,6	0.00926	0.058
chr1	152399580	A	C	INTRON	MODIFIER	FLG-AS1	clustered_events;haplotype	.	100,0	108,6	0.009722	0.06
chr1	152399620	C	A	INTRON	MODIFIER	FLG-AS1	clustered_events	.	70,0	69,10	0.014	0.129
chr1	152399651	T	C	INTRON	MODIFIER	FLG-AS1	clustered_events;haplotype	.	61,0	57,8	0.016	0.134
chr1	152399657	C	G	INTRON	MODIFIER	FLG-AS1	clustered_events;haplotype	.	57,0	57,8	0.017	0.134
chr1	152399671	A	G	INTRON	MODIFIER	FLG-AS1	clustered_events;haplotype	.	60,0	59,8	0.016	0.13
chr1	152399678	C	G	INTRON	MODIFIER	FLG-AS1	clustered_events;haplotype	.	64,0	59,7	0.015	0.118
chr1	152399694	G	A	INTRON	MODIFIER	FLG-AS1	clustered_events	.	58,0	56,5	0.016	0.095
chr1	152399741	G	A	INTRON	MODIFIER	FLG-AS1	clustered_events	.	46,0	47,4	0.021	0.094
chr1	152399760	A	G	INTRON	MODIFIER	FLG-AS1	clustered_events;haplotype	.	41,0	40,3	0.023	0.089
chr1	152399766	A	AGG	INTRON	MODIFIER	FLG-AS1	clustered_events;haplotype;strand_bias;weak_evidence	.	40,0	40,2	0.024	0.068
chr1	153150021	CG	C	FRAME_SHIFT	HIGH	SPRR2G	normal_artifact	STR	135,10	133,18	0.064	0.116
chr1	153534609	CA	C	UTR_3_PRIME	MODIFIER	S100A6	normal_artifact;slippage	STR	57,5	63,7	0.072	0.115
chr1	153607094	TCTG	T	UTR_3_PRIME	MODIFIER	S100A16	normal_artifact;slippage;weak_evidence	STR	45,2	71,5	0.06	0.075
chr1	153663956	TTAC	T,TTACTAC	DOWNSTREAM	MODIFIER	SNAPIN	multiallelic;slippage	STR	13,0,8	14,6,3	0.040,0.359	0.266,0.152
chr1	153663986	CTA	C	DOWNSTREAM	MODIFIER	SNAPIN	weak_evidence	.	28,0	20,2	0.031	0.121
chr1	153689120	AC	A	DOWNSTREAM	MODIFIER	MIR8083	normal_artifact;slippage	STR	243,22	260,60	0.066	0.171
chr1	153698017	G	T	DOWNSTREAM	MODIFIER	NPR1	weak_evidence	.	14,0	3,2	0.063	0.428
chr1	153930918	T	A	DOWNSTREAM	MODIFIER	DENND4B	base_qual;normal_artifact;strand_bias;weak_evidence	.	80,6	114,9	0.071	0.059
chr1	154010209	TA	T	INTRON	MODIFIER	NUP210L	normal_artifact;slippage;weak_evidence	STR	40,3	47,5	0.065	0.098
chr1	154041548	C	T	UPSTREAM	MODIFIER	RNU6-179P	weak_evidence	.	10,0	8,3	0.084	0.307
chr1	154090075	TAAA	T	INTRON	MODIFIER	NUP210L	germline;weak_evidence	STR	9,0	1,1	0.091	0.523
chr1	154117724	C	A	SPLICE_SITE_DONOR	HIGH	NUP210L	base_qual;normal_artifact;strand_bias	.	70,6	86,16	0.024	0.109
chr1	154122720	A	T	INTRON	MODIFIER	NUP210L	germline	.	11,0	5,9	0.075	0.625
chr1	154122731	A	G	INTRON	MODIFIER	NUP210L	germline	.	12,0	4,9	0.072	0.664
chr1	154171310	C	T	UPSTREAM	MODIFIER	TPM3	normal_artifact	.	28,1	23,4	0.064	0.172
chr1	154214283	G	GA	UPSTREAM	MODIFIER	C1orf43	normal_artifact;slippage	STR	27,1	31,5	0.066	0.159
chr1	154254816	GTT	G,GT,GTTT	UPSTREAM	MODIFIER	UBAP2L	germline;multiallelic;normal_artifact	STR	46,13,58,5	63,16,47,19	0.104,0.485,0.041	0.104,0.324,0.095
chr1	154259199	CTT	C,CT,CTTT	UPSTREAM	MODIFIER	UBAP2L	germline;multiallelic;normal_artifact	STR	16,4,16,1	19,6,14,3	0.108,0.422,0.050	0.149,0.300,0.088
chr1	154322023	G	A	NON_SYNONYMOUS_CODING	MODERATE	AQP10	map_qual;normal_artifact	.	279,11	331,16	0.037	0.047
chr1	154454470	AT	A	DOWNSTREAM	MODIFIER	IL6R	normal_artifact;slippage	STR	115,2	74,12	0.025	0.128
chr1	154571834	C	T	SYNONYMOUS_CODING	LOW	CHRNB2	normal_artifact	.	256,18	284,14	0.065	0.044
chr1	154607872	GAC	G	INTRON	MODIFIER	ADAR	normal_artifact;slippage	STR	232,19	338,22	0.074	0.054
chr2	10603125	G	A	NON_SYNONYMOUS_CODING	MODERATE	NOL10	PASS	.	48,1	42,11	0.039	0.216
chr1	154990204	C	T	NON_SYNONYMOUS_CODING	MODERATE	FLAD1	normal_artifact	.	175,16	217,20	0.087	0.084
chr1	154992442	CA	C	UPSTREAM	MODIFIER	LENEP	normal_artifact;slippage	STR	53,3	44,10	0.046	0.174
chr1	155047968	GCA	G	UPSTREAM	MODIFIER	ADAM15	normal_artifact;slippage	STR	190,11	235,11	0.049	0.046
chr1	155051650	A	AG	UPSTREAM	MODIFIER	ADAM15	PASS	STR	16,0	11,4	0.056	0.295
chr1	155052692	C	T	STOP_GAINED	HIGH	ADAM15	normal_artifact	.	82,8	100,8	0.096	0.08
chr1	155058446	G	A	NON_SYNONYMOUS_CODING	MODERATE	ADAM15	normal_artifact	.	193,13	199,43	0.066	0.178
chr1	155062204	AC	A	UPSTREAM	MODIFIER	EFNA4	PASS	STR	20,0	19,11	0.045	0.369
chr1	155081929	TCGC	T	UPSTREAM	MODIFIER	EFNA3	slippage;weak_evidence	STR	11,0	7,2	0.075	0.269
chr1	155135612	G	A	UTR_5_PRIME	MODIFIER	SLC50A1	normal_artifact	.	155,14	198,17	0.087	0.08
chr1	155187419	CG	C	DOWNSTREAM	MODIFIER	TRIM46	PASS	STR	214,3	254,43	0.005343	0.137
chr1	155310141	G	A	NON_SYNONYMOUS_CODING	MODERATE	FDPS	normal_artifact	.	367,19	372,69	0.051	0.157
chr1	155321117	C	T	UPSTREAM	MODIFIER	RUSC1	normal_artifact	.	201,15	233,7	0.069	0.032
chr1	155342062	A	G	SYNONYMOUS_CODING	LOW	ASH1L	normal_artifact	.	122,5	97,16	0.047	0.143
chr1	155381640	T	C	INTRON	MODIFIER	ASH1L	weak_evidence	.	8,0	2,2	0.1	0.499
chr1	155555246	C	T	INTRON	MODIFIER	ASH1L	weak_evidence	.	10,0	3,2	0.083	0.427
chr1	155562425	AGCG	A	UTR_5_PRIME	MODIFIER	ASH1L	normal_artifact;slippage	STR	234,1	250,8	0.008128	0.034
chr1	155562929	T	G	UPSTREAM	MODIFIER	ASH1L	base_qual;normal_artifact;strand_bias	.	87,4	91,16	0.014	0.102
chr1	155615648	A	G	DOWNSTREAM	MODIFIER	MSTO1	normal_artifact	.	328,25	371,26	0.072	0.066
chr1	155661579	A	G	UPSTREAM	MODIFIER	RP11-29H23.5	PASS	.	15,0	34,3	0.057	0.102
chr1	155661588	CG	TA	UPSTREAM	MODIFIER	RP11-29H23.5	weak_evidence	.	15,0	31,2	0.057	0.086
chr1	155824486	T	A	UPSTREAM	MODIFIER	GON4L	weak_evidence	.	8,0	2,1	0.101	0.396
chr1	155952512	T	G	UPSTREAM	MODIFIER	MIR6738	base_qual;weak_evidence	.	32,0	33,5	0.029	0.115
chr1	155955135	C	CT	UPSTREAM	MODIFIER	ARHGEF2	slippage;strand_bias;weak_evidence	STR	60,0	79,4	0.015	0.059
chr1	155966340	G	A	UPSTREAM	MODIFIER	ARHGEF2	normal_artifact	.	55,1	51,7	0.035	0.134
chr1	156053739	GCTC	G	UTR_5_PRIME	MODIFIER	UBQLN4	slippage;weak_evidence	STR	23,0	16,3	0.037	0.189
chr1	156076895	AGAG	A	CODON_CHANGE_PLUS_CODON_DELETION	MODERATE	MEX3A	normal_artifact;slippage;weak_evidence	STR	143,4	195,7	0.033	0.037
chr1	156115182	C	T	SYNONYMOUS_CODING	LOW	LMNA	normal_artifact	.	504,43	557,46	0.079	0.076
chr1	156139588	GGA	G,GGAGA	DOWNSTREAM	MODIFIER	LMNA	slippage;weak_evidence	STR	15,1,0	18,2,6	0.104,0.051	0.101,0.230
chr1	156174783	T	G	UPSTREAM	MODIFIER	SEMA4A	base_qual;strand_bias	.	65,1	93,16	0.016	0.092
chr1	156213022	G	A	NON_SYNONYMOUS_CODING	MODERATE	PMF1	normal_artifact	.	113,8	114,10	0.071	0.086
chr1	156217544	G	T	DOWNSTREAM	MODIFIER	SLC25A44	weak_evidence	.	8,0	2,1	0.101	0.4
chr1	156312435	G	T	INTRON	MODIFIER	CCT3	haplotype;weak_evidence	.	8,0	4,1	0.1	0.286
chr1	156312440	G	T	INTRON	MODIFIER	CCT3	base_qual;haplotype;weak_evidence	.	8,0	4,1	0.1	0.286
chr1	156429633	C	T	UPSTREAM	MODIFIER	C1orf61	normal_artifact;weak_evidence	.	29,2	29,3	0.089	0.115
chr1	156529916	CAAAAA	C,CA,CAA,CAAAA	INTRON	MODIFIER	IQGAP3	germline;multiallelic;normal_artifact	STR	0,7,16,31,0	3,5,13,26,3	0.115,0.256,0.597,0.017	0.105,0.246,0.512,0.073
chr1	156530052	GCA	G	INTRON	MODIFIER	IQGAP3	normal_artifact;slippage;weak_evidence	STR	440,21	506,14	0.042	0.023
chr1	156659232	G	A	UTR_3_PRIME	MODIFIER	BCAN	normal_artifact	.	79,5	102,10	0.06	0.091
chr1	156729433	CTT	C	UPSTREAM	MODIFIER	ISG20L2	PASS	STR	24,0	12,5	0.035	0.314
chr1	156816766	G	A	UTR_5_PRIME	MODIFIER	SH2D2A	normal_artifact	.	201,16	237,45	0.074	0.16
chr1	156826589	G	A	INTRON	MODIFIER	NTRK1	weak_evidence	.	9,0	1,2	0.091	0.599
chr1	156849029	C	T	NON_SYNONYMOUS_CODING	MODERATE	INSRR	normal_artifact	.	284,15	282,62	0.05	0.181
chr1	156868073	T	A	DOWNSTREAM	MODIFIER	NTRK1	normal_artifact	.	591,63	694,72	0.093	0.091
chr1	156954672	T	A	DOWNSTREAM	MODIFIER	ARHGEF11	normal_artifact	.	22,1	9,4	0.08	0.333
chr1	156963479	CA	C	DOWNSTREAM	MODIFIER	ARHGEF11	normal_artifact;slippage	STR	99,1	111,8	0.019	0.065
chr1	157060431	T	C	EXON	MODIFIER	RP11-110J1.2	clustered_events;haplotype;weak_evidence	.	19,0	30,2	0.048	0.088
chr1	157060441	A	G	EXON	MODIFIER	RP11-110J1.2	clustered_events;haplotype;weak_evidence	.	19,0	32,2	0.048	0.083
chr1	157060481	T	A	EXON	MODIFIER	RP11-110J1.2	clustered_events;haplotype;weak_evidence	.	29,0	39,2	0.032	0.07
chr1	157060488	T	C	EXON	MODIFIER	RP11-110J1.2	clustered_events;haplotype;weak_evidence	.	30,0	41,2	0.031	0.067
chr1	157770032	G	A	SYNONYMOUS_CODING	LOW	FCRL2	normal_artifact	.	203,7	167,12	0.037	0.072
chr1	157803798	C	G	UPSTREAM	MODIFIER	FCRL1	normal_artifact	.	76,5	98,17	0.072	0.153
chr1	157834801	C	T	DOWNSTREAM	MODIFIER	CD5L	normal_artifact	.	87,5	139,13	0.063	0.09
chr1	157956451	G	GGAAGAA	INTERGENIC	MODIFIER		weak_evidence	STR	14,0	12,3	0.06	0.232
chr1	158254783	CTCTGTGTG	C	INTRON	MODIFIER	CD1A	normal_artifact;weak_evidence	.	48,6	51,7	0.112	0.121
chr1	158254801	G	C	INTRON	MODIFIER	CD1A	normal_artifact;weak_evidence	.	43,3	43,8	0.063	0.152
chr1	158636252	G	A	UPSTREAM	MODIFIER	SPTA1	PASS	.	16,0	13,4	0.054	0.263
chr1	158681343	A	G	INTRON	MODIFIER	SPTA1	normal_artifact	.	86,3	68,24	0.044	0.261
chr1	159204954	G	A	UTR_5_PRIME	MODIFIER	ACKR1	normal_artifact	.	218,25	264,20	0.102	0.073
chr1	159440220	A	G	SYNONYMOUS_CODING	LOW	OR10J1	PASS	.	181,0	148,22	0.005452	0.13
chr1	159781112	GC	G	FRAME_SHIFT	HIGH	DUSP23	normal_artifact	STR	156,15	136,22	0.079	0.126
chr1	159833373	G	T	DOWNSTREAM	MODIFIER	C1orf204	normal_artifact	.	146,9	113,31	0.062	0.211
chr1	159919336	C	T	SYNONYMOUS_CODING	LOW	TAGLN2	normal_artifact	.	147,12	140,8	0.08	0.053
chr1	160074202	C	A	UPSTREAM	MODIFIER	KCNJ10	weak_evidence	.	10,0	10,2	0.083	0.205
chr1	160166592	C	T	NON_SYNONYMOUS_CODING	MODERATE	ATP1A4	normal_artifact	.	241,24	288,39	0.092	0.12
chr1	160173892	C	T	UPSTREAM	MODIFIER	ATP1A4	weak_evidence	.	8,0	4,2	0.094	0.375
chr1	160195652	GC	G	UPSTREAM	MODIFIER	CASQ1	normal_artifact;slippage;weak_evidence	STR	84,6	46,3	0.064	0.077
chr1	160218109	C	T	DOWNSTREAM	MODIFIER	PEA15	weak_evidence	.	15,0	9,2	0.057	0.231
chr1	160225153	AC	A	UPSTREAM	MODIFIER	DCAF8	normal_artifact	STR	179,18	179,14	0.064	0.061
chr1	160225278	AG	A	UPSTREAM	MODIFIER	DCAF8	normal_artifact	STR	119,10	96,8	0.073	0.077
chr1	160307140	T	C	UPSTREAM	MODIFIER	COPA	normal_artifact	.	154,9	165,14	0.06	0.081
chr1	160317339	T	C	UPSTREAM	MODIFIER	SUMO1P3	PASS	.	52,0	56,3	0.018	0.065
chr1	160895640	C	T	EXON	MODIFIER	RP11-312J18.5	weak_evidence	.	8,0	7,2	0.1	0.277
chr1	160895651	A	G	EXON	MODIFIER	RP11-312J18.5	base_qual;weak_evidence	.	8,0	6,4	0.101	0.39
chr1	160895764	A	G	EXON	MODIFIER	RP11-312J18.5	PASS	.	13,0	13,2	0.067	0.176
chr1	160895768	A	G	EXON	MODIFIER	RP11-312J18.5	PASS	.	13,0	13,2	0.065	0.175
chr1	160935560	C	T	UPSTREAM	MODIFIER	RP11-312J18.6	PASS	.	37,0	43,10	0.025	0.199
chr1	161041946	GGA	G,GGAGA	UPSTREAM	MODIFIER	TSTD1	germline;multiallelic;normal_artifact;slippage	STR	69,17,4	66,13,7	0.181,0.044	0.150,0.082
chr1	161212574	CT	C	UPSTREAM	MODIFIER	FCER1G	normal_artifact;slippage;weak_evidence	STR	32,1	34,3	0.052	0.101
chr1	161214213	TC	T	UPSTREAM	MODIFIER	FCER1G	normal_artifact	STR	60,7	69,20	0.093	0.211
chr1	161223055	CCACACA	C,CCA,CCACA,CCACACACA	UTR_3_PRIME	MODIFIER	APOA2	germline;multiallelic;normal_artifact	STR	12,22,36,46,1	25,21,41,33,6	0.176,0.303,0.395,0.015	0.158,0.327,0.268,0.051
chr1	161236548	A	C	NON_SYNONYMOUS_CODING	MODERATE	NR1I3	base_qual;strand_bias	.	258,0	314,38	0.003842	0.063
chr1	161237965	T	C	UPSTREAM	MODIFIER	NR1I3	normal_artifact	.	82,6	99,9	0.076	0.09
chr1	161518015	T	C	NON_SYNONYMOUS_CODING	MODERATE	FCGR2A	map_qual;normal_artifact;strand_bias	.	138,14	172,7	0.094	0.044
chr1	161548536	T	G	SYNONYMOUS_CODING	LOW	FCGR3A	base_qual;strand_bias	.	1040,4	1231114	0.001703	0.032
chr1	161589926	T	C	UPSTREAM	MODIFIER	FCGR2C	PASS	.	60,0	74,11	0.016	0.137
chr1	161591404	A	C	UPSTREAM	MODIFIER	FCGR2C	normal_artifact	.	169,12	196,9	0.067	0.048
chr1	161595497	G	C	UPSTREAM	MODIFIER	FCGR2C	PASS	.	104,0	136,12	0.009325	0.086
chr1	161673235	C	A	DOWNSTREAM	MODIFIER	RP11-25K21.1	map_qual;normal_artifact	.	94,5	81,4	0.059	0.057
chr1	161725642	C	CA	UPSTREAM	MODIFIER	FCRLB	PASS	STR	25,0	20,6	0.035	0.237
chr1	161998003	TG	T	FRAME_SHIFT	HIGH	OLFML2B	normal_artifact	STR	147,9	148,25	0.053	0.143
chr1	162357097	CCAG	C	CODON_DELETION	MODERATE	NOS1AP	normal_artifact;slippage;weak_evidence	STR	280,5	269,5	0.02	0.021
chr1	162397325	GA	G	INTRON	MODIFIER	SH2D1B	normal_artifact;slippage	STR	72,6	63,13	0.071	0.158
chr1	162590570	TTC	T,TTCTC,TTCTCTC	UPSTREAM	MODIFIER	RP11-359K18.4	germline;multiallelic;normal_artifact;slippage	STR	19,2,38,5	26,4,49,14	0.039,0.596,0.085	0.047,0.527,0.151
chr1	164357143	C	G	EXON	MODIFIER	HMGB3P6	PASS	.	67,0	91,4	0.014	0.051
chr1	164357147	A	G	EXON	MODIFIER	HMGB3P6	PASS	.	67,0	91,4	0.015	0.051
chr1	164357274	A	AG	EXON	MODIFIER	HMGB3P6	strand_bias;weak_evidence	STR	45,0	51,3	0.021	0.072
chr1	165022132	C	A	INTERGENIC	MODIFIER		weak_evidence	.	9,0	12,2	0.091	0.187
chr1	165801300	G	T	INTRON	MODIFIER	TMCO1	weak_evidence	.	8,0	3,2	0.097	0.425
chr1	165819735	T	C	INTRON	MODIFIER	TMCO1	PASS	.	24,0	20,6	0.039	0.251
chr1	165896460	G	A	UPSTREAM	MODIFIER	UCK2	weak_evidence	.	23,0	27,2	0.039	0.097
chr1	165920727	A	G	INTERGENIC	MODIFIER		weak_evidence	.	9,0	3,1	0.091	0.333
chr1	166070270	G	T	NON_SYNONYMOUS_CODING	MODERATE	FAM78B	normal_artifact	.	139,8	120,18	0.06	0.134
chr1	166166309	CG	C	UTR_5_PRIME	MODIFIER	FAM78B	weak_evidence	STR	9,0	6,2	0.091	0.297
chr1	166276465	A	G	EXON	MODIFIER	RP11-9L18.2	weak_evidence	.	37,0	48,2	0.026	0.058
chr1	166276486	T	C	EXON	MODIFIER	RP11-9L18.2	PASS	.	42,0	46,3	0.023	0.077
chr1	166849261	GA	G	FRAME_SHIFT	HIGH	POGK	normal_artifact	STR	299,36	311,34	0.099	0.081
chr1	167486854	A	G	INTRON	MODIFIER	CD247	weak_evidence	.	8,0	2,2	0.1	0.499
chr1	168085630	GC	G	FRAME_SHIFT	HIGH	GPR161	normal_artifact	STR	528,43	487,52	0.062	0.078
chr1	168199065	C	T	INTRON	MODIFIER	TIPRL	normal_artifact	.	87,2	88,12	0.032	0.126
chr1	168293285	G	GTGTT	UPSTREAM	MODIFIER	TBX19	weak_evidence	.	19,0	19,4	0.039	0.193
chr1	168580239	G	A	UPSTREAM	MODIFIER	RP4-738P11.4	map_qual;normal_artifact;strand_bias;weak_evidence	.	149,4	158,4	0.031	0.03
chr1	168700898	TGTGTGTGTGG	T	INTRON	MODIFIER	DPT	weak_evidence	.	37,0	11,2	0.025	0.197
chr1	169111499	G	GAT	SPLICE_SITE_DONOR	HIGH	ATP1B1	clustered_events;fragment;haplotype;weak_evidence	.	93,0	90,3	0.01	0.042
chr1	169111502	A	AC	INTRON	MODIFIER	ATP1B1	clustered_events;fragment;haplotype;weak_evidence	.	94,0	90,3	0.01	0.042
chr1	169111503	A	ACAGATTCCTCAG	INTRON	MODIFIER	ATP1B1	clustered_events;fragment;haplotype;position;weak_evidence	.	93,0	88,3	0.011	0.043
chr1	169701560	CT	C	FRAME_SHIFT	HIGH	SELL	normal_artifact	STR	68,5	44,13	0.068	0.214
chr1	169827641	CA	C	INTRON	MODIFIER	C1orf112	normal_artifact;slippage;weak_evidence	STR	819,4	757,12	0.004251	0.014
chr1	169827926	GT	G,GTT	INTRON	MODIFIER	C1orf112	multiallelic;normal_artifact;slippage;strand_bias	STR	511,18,13	468,13,11	0.029,0.023	0.025,0.021
chr1	170958432	T	C	INTRON	MODIFIER	MROH9	normal_artifact	.	116,17	147,32	0.103	0.124
chr1	170983635	GT	G	INTRON	MODIFIER	MROH9	slippage;weak_evidence	STR	24,0	18,3	0.037	0.174
chr1	171413821	C	T	INTERGENIC	MODIFIER		germline;weak_evidence	.	8,0	9,3	0.1	0.284
chr1	171536317	AT	A	DOWNSTREAM	MODIFIER	PRRC2C	normal_artifact;slippage;weak_evidence	STR	40,2	64,4	0.067	0.071
chr1	171557860	AG	CC	NON_SYNONYMOUS_CODING	MODERATE	PRRC2C	normal_artifact;strand_bias;weak_evidence	.	106,2	133,6	0.02	0.039
chr1	171670653	T	C	EXON	MODIFIER	PFN1P1	clustered_events;haplotype;strand_bias	.	206,0	269,4	0.004789	0.018
chr1	171670662	A	G	EXON	MODIFIER	PFN1P1	clustered_events;haplotype;strand_bias	.	215,0	293,4	0.004609	0.017
chr1	171670669	GTA	G	EXON	MODIFIER	PFN1P1	clustered_events;haplotype;strand_bias;weak_evidence	STR	225,0	316,4	0.00439	0.015
chr1	171670887	T	C	EXON	MODIFIER	PFN1P1	normal_artifact	.	223,11	208,82	0.05	0.282
chr1	171709559	G	C	INTRON	MODIFIER	VAMP4	normal_artifact	.	93,4	164,12	0.051	0.065
chr1	172585039	A	G	NON_SYNONYMOUS_CODING	MODERATE	SUCO	normal_artifact	.	90,6	95,5	0.071	0.059
chr1	172748866	C	T	UPSTREAM	MODIFIER	RP3-332O11.2	normal_artifact	.	55,4	73,8	0.081	0.101
chr1	173521524	G	A	INTRON	MODIFIER	SLC9C2	weak_evidence	.	8,0	10,2	0.096	0.212
chr1	173533842	G	A	INTRON	MODIFIER	SLC9C2	PASS	.	20,0	23,3	0.045	0.143
chr1	173576768	G	GA	UPSTREAM	MODIFIER	SLC9C2	normal_artifact;slippage;weak_evidence	STR	46,3	73,7	0.07	0.082
chr1	173828312	TTCC	T,TC	UPSTREAM	MODIFIER	CENPL	multiallelic;normal_artifact	.	72,7,52	92,103,58	0.051,0.390	0.397,0.227
chr1	173864772	A	G	UPSTREAM	MODIFIER	ZBTB37	normal_artifact	.	97,7	104,69	0.075	0.399
chr1	173904099	C	T	DOWNSTREAM	MODIFIER	ZBTB37	normal_artifact	.	75,7	114,14	0.088	0.113
chr1	173907402	C	T	DOWNSTREAM	MODIFIER	ZBTB37	PASS	.	53,2	42,30	0.05	0.42
chr1	173980940	G	A	PROTEIN_STRUCTURAL_INTERACTION_LOCUS	HIGH	RC3H1	normal_artifact	.	49,4	55,10	0.09	0.159
chr1	173992697	C	G,CAG	INTRON	MODIFIER	RC3H1	multiallelic	.	42,0,0	24,4,8	0.021,0.020	0.121,0.214
chr1	173993078	CTT	C,CT	UTR_5_PRIME	MODIFIER	RC3H1	germline;multiallelic;normal_artifact	STR	8,0,13	6,6,21	0.039,0.580	0.202,0.600
chr1	174304943	T	G	INTRON	MODIFIER	RABGAP1L	normal_artifact	.	50,3	44,14	0.06	0.245
chr1	174964990	GT	G	INTRON	MODIFIER	RABGAP1L	normal_artifact;slippage	STR	59,2	56,5	0.048	0.099
chr1	175014928	ATTTTC	A	UPSTREAM	MODIFIER	MRPS14	normal_artifact;slippage;weak_evidence	STR	23,3	20,4	0.088	0.186
chr1	175356461	G	A	SYNONYMOUS_CODING	LOW	TNR	normal_artifact	.	115,2	113,6	0.023	0.057
chr1	175359592	G	A	INTRON	MODIFIER	TNR	normal_artifact	.	44,3	40,4	0.081	0.108
chr1	176793587	TC	T	FRAME_SHIFT	HIGH	PAPPA2	PASS	STR	169,4	156,84	0.029	0.348
chr1	177023577	G	T	INTRON	MODIFIER	ASTN1	PASS	.	73,0	50,41	0.013	0.452
chr1	177948085	A	G	INTRON	MODIFIER	SEC16B	normal_artifact	.	49,3	43,52	0.074	0.547
chr1	177948369	C	G	INTRON	MODIFIER	SEC16B	normal_artifact;strand_bias	.	48,3	107,5	0.075	0.053
chr1	178411954	AC	A	INTRON	MODIFIER	RASAL2	normal_artifact	STR	167,28	343,25	0.122	0.041
chr1	179109268	TG	T	FRAME_SHIFT	HIGH	ABL2	normal_artifact	STR	215,21	210227	0.081	0.52
chr1	179133016	G	A	UPSTREAM	MODIFIER	RP11-345I18.1	PASS	.	12,0	15,3	0.071	0.201
chr1	179277170	AT	A	INTERGENIC	MODIFIER		germline;slippage	STR	8,0	9,8	0.094	0.472
chr1	179411079	TA	T	INTRON	MODIFIER	AXDND1	weak_evidence	STR	18,0	32,3	0.05	0.109
chr1	179907913	CTTTTT	C,CT,CTT	DOWNSTREAM	MODIFIER	TOR1AIP1	germline;multiallelic;normal_artifact	STR	19,0,0,4	9,7,14,17	0.031,0.033,0.177	0.136,0.311,0.392
chr1	180062146	AT	A	INTRON	MODIFIER	CEP350	slippage;weak_evidence	STR	15,0	14,3	0.059	0.212
chr12	12813517	G	A	SPLICE_SITE_DONOR	HIGH	DDX47	PASS	.	118,0	95,26	0.00828	0.216
chr1	180501910	AAAAAAAAAC	A	INTRON	MODIFIER	ACBD6	normal_artifact	.	140,11	164,21	0.063	0.098
chr1	180941299	C	T	DOWNSTREAM	MODIFIER	RP11-46A10.5	normal_artifact	.	127,8	247,21	0.064	0.08
chr1	181710965	AAG	A	FRAME_SHIFT	HIGH	CACNA1E	normal_artifact;slippage	STR	98,7	80,29	0.07	0.269
chr1	181766491	T	G	INTRON	MODIFIER	CACNA1E	base_qual;strand_bias	.	162,0	207,27	0.006093	0.067
chr1	181783633	AT	A,ATTT	INTRON	MODIFIER	CACNA1E	germline;normal_artifact	STR	26,32,1	26,38,3	0.485,0.035	0.571,0.059
chr1	181798142	T	C	INTRON	MODIFIER	CACNA1E	weak_evidence	.	31,0	24,2	0.03	0.106
chr1	182085642	AGAGG	A	UPSTREAM	MODIFIER	RP11-538D16.3	slippage;weak_evidence	STR	15,0	6,2	0.059	0.3
chr19	14097868	C	T	NON_SYNONYMOUS_CODING	MODERATE	PRKACA	PASS	.	270,1	237,63	0.007174	0.211
chr1	182602515	GA	G	INTRON	MODIFIER	RGS16	slippage;weak_evidence	STR	52,0	37,5	0.018	0.123
chr1	182806398	GC	G	FRAME_SHIFT	HIGH	NPL	normal_artifact	STR	218,15	201,18	0.051	0.075
chr1	182814635	A	G	UPSTREAM	MODIFIER	NPL	weak_evidence	.	24,0	30,2	0.039	0.088
chr1	183020485	CT	C	UPSTREAM	MODIFIER	LAMC1	germline;slippage;weak_evidence	STR	8,0	3,2	0.101	0.43
chr1	183218657	AAC	A	INTRON	MODIFIER	LAMC2	slippage;weak_evidence	STR	28,0	21,2	0.032	0.119
chr1	183526798	A	G	DOWNSTREAM	MODIFIER	SMG7	normal_artifact	.	105,6	96,17	0.061	0.156
chr1	183529056	G	GT	DOWNSTREAM	MODIFIER	SMG7	normal_artifact;slippage;weak_evidence	STR	112,13	101,7	0.077	0.056
chr1	183648358	G	A	SYNONYMOUS_CODING	LOW	APOBEC4	normal_artifact	.	107,3	102,20	0.036	0.168
chr20	25685594	T	C	NON_SYNONYMOUS_CODING	MODERATE	ZNF337	PASS	.	132,0	100,25	0.007436	0.204
chr1	184440476	C	A	INTRON	MODIFIER	C1orf21	weak_evidence	.	8,0	1,1	0.1	0.5
chr1	184440499	G	T	INTRON	MODIFIER	C1orf21	weak_evidence	.	9,0	1,1	0.088	0.5
chr1	184701516	T	C	SYNONYMOUS_CODING	LOW	EDEM3	normal_artifact	.	47,1	46,7	0.04	0.144
chr1	184706534	TA	T	INTRON	MODIFIER	EDEM3	normal_artifact;slippage;weak_evidence	STR	54,1	48,9	0.034	0.136
chr1	184803609	C	A	NON_SYNONYMOUS_CODING	MODERATE	FAM129A	normal_artifact	.	107,3	98,6	0.034	0.065
chr1	184824517	C	T	UPSTREAM	MODIFIER	RNU7-13P	normal_artifact	.	24,1	18,5	0.074	0.239
chr1	185027334	A	G	INTERGENIC	MODIFIER		weak_evidence	.	9,0	3,2	0.091	0.428
chr1	185984151	C	T,CT	INTRON	MODIFIER	HMCN1	normal_artifact;weak_evidence	.	77,0,7	47,2,6	0.011,0.066	0.051,0.108
chr1	186053917	G	A	NON_SYNONYMOUS_CODING	MODERATE	HMCN1	normal_artifact	.	85,6	98,7	0.068	0.074
chr1	234429299	C	T	NON_SYNONYMOUS_CODING	MODERATE	TARBP1	PASS	.	115,0	89,22	0.0085	0.203
chr1	186350094	GT	G,GTT	DOWNSTREAM	MODIFIER	TPR	germline;normal_artifact;slippage;weak_evidence	STR	6,2,0	4,2,2	0.272,0.088	0.273,0.273
chr1	186398882	T	TC	UPSTREAM	MODIFIER	AL596220.1	normal_artifact	.	24,1	20,3	0.073	0.16
chr1	189170791	G	A	INTERGENIC	MODIFIER		germline	.	8,0	4,2	0.101	0.375
chr1	190264943	T	C	SYNONYMOUS_CODING	LOW	BRINP3	PASS	.	144,0	106,6	0.00677	0.058
chr1	191146546	G	A	UPSTREAM	MODIFIER	RP11-309H21.3	normal_artifact	.	82,4	58,8	0.055	0.13
chr1	192246973	T	TG	UPSTREAM	MODIFIER	RP11-142L4.2	weak_evidence	.	27,0	15,2	0.035	0.155
chr1	193051712	GTA	G	INTRON	MODIFIER	UCHL5	slippage;weak_evidence	STR	123,0	98,4	0.007895	0.044
chr1	193051909	A	G	INTRON	MODIFIER	UCHL5	normal_artifact	.	103,4	126,5	0.038	0.045
chr1	193076425	AT	A	DOWNSTREAM	MODIFIER	TROVE2	normal_artifact;weak_evidence	STR	33,1	40,3	0.055	0.09
chr1	193236326	G	A	NON_SYNONYMOUS_CODING	MODERATE	CDC73	normal_artifact	.	159,9	150,15	0.058	0.095
chr1	193236363	T	C	DOWNSTREAM	MODIFIER	Metazoa_SRP	normal_artifact	.	114,8	98,20	0.072	0.174
chr1	194189240	G	A	INTRON	MODIFIER	RP11-563D10.1	normal_artifact	.	57,3	53,7	0.064	0.129
chr1	194356961	A	ATG	DOWNSTREAM	MODIFIER	RP11-476H20.1	normal_artifact;slippage	STR	23,1	30,4	0.072	0.137
chr1	196273362	T	C	INTRON	MODIFIER	KCNT2	PASS	.	22,0	33,4	0.041	0.128
chr1	196828162	G	C	NON_SYNONYMOUS_CODING	MODERATE	CFHR1	normal_artifact;strand_bias	.	61,3	49,8	0.061	0.152
chr1	197062796	AT	A	INTRON	MODIFIER	F13B	normal_artifact	STR	69,5	57,14	0.079	0.193
chr1	197172105	CTA	C	INTRON	MODIFIER	ZBTB41	slippage;strand_bias	STR	38,0	42,4	0.024	0.102
chr1	197928893	CAAA	C,CAAAAA	INTRON	MODIFIER	LHX9	germline;normal_artifact	STR	8,13,0	8,10,3	0.539,0.043	0.441,0.168
chr1	197929265	GT	G,GTT	UTR_3_PRIME	MODIFIER	LHX9	germline;multiallelic;normal_artifact	STR	28,43,3	37,36,8	0.584,0.052	0.445,0.100
chr1	198165085	C	T	INTRON	MODIFIER	NEK7	weak_evidence	.	8,0	1,2	0.101	0.599
chr1	200329196	A	G	UPSTREAM	MODIFIER	RP11-469A15.2	weak_evidence	.	11,0	9,2	0.077	0.231
chr1	200329198	G	A	UPSTREAM	MODIFIER	RP11-469A15.2	weak_evidence	.	11,0	9,2	0.077	0.229
chr1	200409430	A	AG	FRAME_SHIFT	HIGH	ZNF281	normal_artifact;slippage;weak_evidence	STR	116,14	144,9	0.096	0.054
chr1	200484140	C	A	UPSTREAM	MODIFIER	RP11-121P12.1	weak_evidence	.	8,0	3,2	0.1	0.427
chr1	200581370	TA	T	INTRON	MODIFIER	KIF14	normal_artifact;slippage;weak_evidence	STR	49,6	41,4	0.109	0.108
chr1	200603352	GA	G	INTRON	MODIFIER	KIF14	normal_artifact;slippage;weak_evidence	STR	58,6	61,7	0.062	0.099
chr1	200857891	TA	T	FRAME_SHIFT	HIGH	CAMSAP2	PASS	STR	187,0	215,14	0.005223	0.048
chr1	200873647	TTGC	T	CODON_DELETION	MODERATE	GPR25	normal_artifact;slippage	STR	339,10	339,8	0.031	0.025
chr1	200913410	CCTG	C	UPSTREAM	MODIFIER	MROH3P	normal_artifact;slippage;weak_evidence	STR	307,5	308,5	0.018	0.019
chr1	201094163	AC	A	INTRON	MODIFIER	CACNA1S	PASS	STR	14,0	15,5	0.06	0.271
chr7	6466100	C	T	NON_SYNONYMOUS_CODING	MODERATE	KDELR2	PASS	.	121,2	106,26	0.024	0.201
chr1	201211115	A	G	SYNONYMOUS_CODING	LOW	IGFN1	normal_artifact;strand_bias	.	558,11	580,11	0.021	0.02
chr1	201312994	C	T	UPSTREAM	MODIFIER	PKP1	normal_artifact	.	63,2	42,6	0.044	0.139
chr1	201468547	GC	G	FRAME_SHIFT	HIGH	PHLDA3	normal_artifact	STR	448,26	444,44	0.047	0.075
chr1	201718499	C	T	NON_SYNONYMOUS_CODING	MODERATE	NAV1	normal_artifact	.	187,15	178,56	0.074	0.24
chr1	201910666	C	A	INTRON	MODIFIER	LMOD1	haplotype;weak_evidence	.	8,0	0,1	0.1	0.667
chr1	201910668	G	T	INTRON	MODIFIER	LMOD1	base_qual;haplotype;weak_evidence	.	8,0	0,1	0.1	0.667
chr1	201929019	G	A	INTRON	MODIFIER	LMOD1	weak_evidence	.	10,0	2,2	0.083	0.517
chr1	201957258	C	CT	UPSTREAM	MODIFIER	TIMM17A	normal_artifact;slippage;weak_evidence	STR	104,6	101,10	0.037	0.07
chr1	201989576	G	A	DOWNSTREAM	MODIFIER	RNPEP	normal_artifact	.	87,4	76,5	0.054	0.071
chr1	202025504	TTGG	T	UPSTREAM	MODIFIER	RP11-510N19.2	germline;slippage;weak_evidence	STR	8,0	8,2	0.097	0.249
chr1	202103025	G	A	INTERGENIC	MODIFIER		clustered_events;haplotype;weak_evidence	.	8,0	4,1	0.1	0.286
chr1	202103034	AG	CA	INTERGENIC	MODIFIER		clustered_events;haplotype;weak_evidence	.	9,0	4,1	0.091	0.286
chr1	202103050	A	C	INTERGENIC	MODIFIER		clustered_events;haplotype;weak_evidence	.	8,0	4,1	0.1	0.286
chr1	202103071	TG	CA	INTERGENIC	MODIFIER		clustered_events;haplotype;weak_evidence	.	8,0	4,1	0.1	0.286
chr1	202103079	GA	TT	INTERGENIC	MODIFIER		clustered_events;haplotype;weak_evidence	.	8,0	4,1	0.1	0.286
chr1	202128396	ACTG	A	CODON_CHANGE_PLUS_CODON_DELETION	MODERATE	GPR37L1	normal_artifact;slippage	STR	379,10	386,12	0.027	0.032
chr1	202138294	AACAC	A,AAC,AACACAC	UPSTREAM	MODIFIER	ARL8A	germline;multiallelic;normal_artifact	STR	8,0,27,7	12,7,14,12	0.020,0.588,0.172	0.154,0.309,0.263
chr1	202449058	G	A	SYNONYMOUS_CODING	LOW	PPP1R12B	normal_artifact	.	156,12	175,13	0.076	0.072
chr1	202853079	C	T	DOWNSTREAM	MODIFIER	RP11-480I12.5	normal_artifact	.	65,3	43,6	0.057	0.136
chr1	202858216	T	C	UPSTREAM	MODIFIER	RP11-480I12.9	normal_artifact	.	103,9	93,15	0.086	0.145
chr1	202861379	A	C	UPSTREAM	MODIFIER	RP11-480I12.9	base_qual;haplotype;strand_bias	.	95,1	121,5	0.011	0.039
chr1	202861382	GA	CC	UPSTREAM	MODIFIER	RP11-480I12.9	base_qual;haplotype;strand_bias	.	100,1	135,5	0.01	0.035
chr1	203353380	GGA	G	UPSTREAM	MODIFIER	FMOD	PASS	STR	82,1	71,13	0.023	0.163
chr1	204096411	GTATT	G	INTRON	MODIFIER	SOX13	germline;slippage;weak_evidence	STR	8,0	7,2	0.097	0.27
chr1	204223276	A	G	INTRON	MODIFIER	PLEKHA6	PASS	.	32,0	31,7	0.029	0.199
chr1	204261550	G	T	INTRON	MODIFIER	PLEKHA6	normal_artifact	.	40,2	34,12	0.067	0.27
chr1	204425760	CA	C	INTRON	MODIFIER	PIK3C2B	normal_artifact	STR	51,2	39,4	0.054	0.11
chr1	204467204	G	T	INTRON	MODIFIER	PIK3C2B	normal_artifact	.	25,2	30,3	0.101	0.115
chr1	204529603	TG	T	EXON	MODIFIER	RP11-430C7.2	germline;normal_artifact;slippage;weak_evidence	STR	24,3	11,4	0.113	0.277
chr1	205064524	G	A	UPSTREAM	MODIFIER	CNTN2	normal_artifact	.	157,10	159,16	0.06	0.095
chr1	205271336	T	TG	DOWNSTREAM	MODIFIER	TMCC2	normal_artifact	STR	122,7	117,14	0.054	0.105
chr1	205620847	TAA	T,TA	UPSTREAM	MODIFIER	RP11-6B6.3	germline;normal_artifact	STR	44,1,41	37,5,58	0.021,0.484	0.049,0.587
chr1	205646552	T	TA	INTERGENIC	MODIFIER		slippage	STR	39,0	18,7	0.024	0.298
chr1	205660782	C	A	INTRON	MODIFIER	SLC45A3	weak_evidence	.	8,0	2,2	0.1	0.499
chr1	205774804	T	C	INTRON	MODIFIER	RAB29	base_qual;clustered_events;haplotype;normal_artifact;strand_bias;weak_evidence	.	48,2	59,2	0.043	0.048
chr1	205774810	T	C	INTRON	MODIFIER	RAB29	clustered_events;haplotype;normal_artifact;strand_bias;weak_evidence	.	53,1	75,2	0.036	0.038
chr1	205774815	A	C	INTRON	MODIFIER	RAB29	base_qual;clustered_events;haplotype;strand_bias;weak_evidence	.	59,0	83,2	0.016	0.034
chr1	205850167	G	A	UPSTREAM	MODIFIER	PM20D1	weak_evidence	.	11,0	8,2	0.075	0.25
chr1	205894858	T	C	INTERGENIC	MODIFIER		weak_evidence	.	9,0	1,1	0.091	0.5
chr1	205915518	CTG	C,CTGTG	INTRON	MODIFIER	SLC26A9	germline;normal_artifact;slippage;weak_evidence	STR	9,8,1	4,5,3	0.424,0.082	0.401,0.259
chr1	205924605	CT	C	DOWNSTREAM	MODIFIER	SLC26A9	normal_artifact;slippage	STR	57,2	44,8	0.048	0.146
chr1	206010015	ATGTG	A	UTR_3_PRIME	MODIFIER	CTSE	weak_evidence	STR	22,0	26,2	0.04	0.1
chr1	206458710	C	T	SYNONYMOUS_CODING	LOW	SRGAP2	normal_artifact	.	541,31	547,68	0.05	0.109
chr1	206474924	T	C	SYNONYMOUS_CODING	LOW	IKBKE	normal_artifact	.	110,3	96,17	0.033	0.156
chr1	206612170	C	T	UPSTREAM	MODIFIER	EIF2D	PASS	.	289,4	230,55	0.016	0.193
chr1	206932940	G	A	UPSTREAM	MODIFIER	PIGR	normal_artifact	.	126,11	126,13	0.085	0.098
chr1	206934846	C	CAT	UPSTREAM	MODIFIER	PIGR	normal_artifact;slippage	STR	67,4	75,11	0.067	0.132
chr1	206938100	A	G	INTRON	MODIFIER	PIGR	weak_evidence	.	14,0	10,2	0.062	0.214
chr1	206960668	T	G	NON_SYNONYMOUS_CODING	MODERATE	FCAMR	base_qual;strand_bias	.	309,3	261,67	0.003366	0.15
chr1	207063885	T	TGGGG	DOWNSTREAM	MODIFIER	PFKFB2	normal_artifact;strand_bias;weak_evidence	STR	91,5	65,5	0.06	0.079
chr1	207471004	G	A	SYNONYMOUS_CODING	LOW	CR2	normal_artifact	.	76,6	87,10	0.082	0.11
chr1	207577784	A	G	INTRON	MODIFIER	CR1	normal_artifact	.	213,12	189,22	0.056	0.106
chr1	207669604	C	T	INTRON	MODIFIER	CR1L	PASS	.	20,0	17,4	0.045	0.203
chr1	207678344	A	T	DOWNSTREAM	MODIFIER	CR1L	normal_artifact	.	120,9	88,20	0.076	0.189
chr1	208287808	T	C	INTERGENIC	MODIFIER		weak_evidence	.	8,0	0,2	0.097	0.75
chr1	208869283	C	G	INTERGENIC	MODIFIER		weak_evidence	.	9,0	3,2	0.091	0.427
chr1	209622741	C	A	DOWNSTREAM	MODIFIER	LAMB3	normal_artifact	.	176,10	165,30	0.059	0.156
chr1	209828045	C	T	UTR_5_PRIME	MODIFIER	DIEXF	normal_artifact	.	142,9	134,10	0.065	0.074
chr1	210233994	T	A	UPSTREAM	MODIFIER	SERTAD4-AS1	normal_artifact	.	62,3	50,7	0.036	0.12
chr1	210241780	T	C	NON_SYNONYMOUS_CODING	MODERATE	SERTAD4	normal_artifact	.	165,9	134,11	0.056	0.081
chr1	210362834	CTT	C,CT,CTTT	UPSTREAM	MODIFIER	HHAT	germline;multiallelic;normal_artifact	STR	61,93,9,7	56,101,15,8	0.540,0.031,0.028	0.562,0.074,0.041
chr1	210418168	G	A	SYNONYMOUS_CODING	LOW	HHAT	normal_artifact	.	230,18	165,22	0.075	0.119
chr1	210631027	C	A	INTRON	MODIFIER	HHAT	normal_artifact	.	67,4	39,12	0.069	0.246
chr1	210920205	T	TA	INTRON	MODIFIER	KCNH1	normal_artifact;weak_evidence	STR	40,4	43,4	0.093	0.102
chr1	211372349	C	T	NON_SYNONYMOUS_CODING	MODERATE	TRAF5	normal_artifact	.	113,9	143,16	0.079	0.105
chr1	212035730	G	A	START_GAINED	LOW	DTL	PASS	.	136,0	116,10	0.007191	0.072
chr1	212051604	G	T	INTRON	MODIFIER	DTL	germline	.	10,0	8,4	0.083	0.356
chr1	212335198	G	A	UPSTREAM	MODIFIER	RP11-384C4.7	weak_evidence	.	9,0	1,2	0.091	0.599
chr1	212385494	A	C	INTRON	MODIFIER	TMEM206	base_qual;strand_bias	.	146,4	126,23	0.007691	0.1
chr1	212804684	G	A	DOWNSTREAM	MODIFIER	TATDN3	normal_artifact	.	92,10	78,16	0.104	0.176
chr1	213167845	CT	C	INTRON	MODIFIER	RPS6KC1	normal_artifact;slippage	STR	119,17	119,22	0.112	0.135
chr1	213917348	TTCC	T	INTRON	MODIFIER	PROX1-AS1	slippage;weak_evidence	STR	43,0	26,2	0.021	0.1
chr7	128906285	T	C	NON_SYNONYMOUS_CODING	MODERATE	KCP	PASS	.	56,0	39,9	0.017	0.2
chr1	214318038	TA	T	INTRON	MODIFIER	SMYD2	normal_artifact	STR	81,11	72,13	0.109	0.147
chr1	214336479	C	T	INTRON	MODIFIER	SMYD2	weak_evidence	.	21,0	9,2	0.043	0.229
chr1	214383705	GCCT	G	CODON_CHANGE_PLUS_CODON_DELETION	MODERATE	PTPN14	normal_artifact;slippage	STR	382,13	442,14	0.034	0.031
chr1	214383887	C	T	NON_SYNONYMOUS_CODING	MODERATE	PTPN14	normal_artifact	.	275,26	327,13	0.088	0.04
chr1	214483443	A	G	UPSTREAM	MODIFIER	RP11-365D23.4	germline	.	12,0	6,3	0.07	0.364
chr1	214644465	G	A	UPSTREAM	MODIFIER	CENPF	weak_evidence	.	20,0	25,2	0.045	0.103
chr1	214655473	G	A	DOWNSTREAM	MODIFIER	CENPF	PASS	.	74,0	56,9	0.013	0.148
chr10	44375958	G	A	NON_SYNONYMOUS_CODING	MODERATE	CXCL12	PASS	.	35,0	39,9	0.026	0.2
chr1	215573827	C	CT	FRAME_SHIFT	HIGH	KCTD3	normal_artifact;slippage	STR	95,10	76,13	0.086	0.123
chr9	12704559	C	T	NON_SYNONYMOUS_CODING	MODERATE	TYRP1	PASS	.	28,0	23,5	0.033	0.199
chr1	216791333	A	G	INTRON	MODIFIER	ESRRG	weak_evidence	.	9,0	2,2	0.091	0.5
chr1	217683512	C	T	INTRON	MODIFIER	SPATA17	PASS	.	22,0	29,3	0.041	0.118
chr1	217859485	G	A	UPSTREAM	MODIFIER	SPATA17	base_qual;weak_evidence	.	8,0	2,2	0.097	0.482
chr1	218017714	C	A	INTERGENIC	MODIFIER		PASS	.	21,0	13,7	0.044	0.363
chr1	218501017	TC	T	INTERGENIC	MODIFIER		weak_evidence	STR	10,0	4,3	0.085	0.433
chr1	219193149	T	C	PROTEIN_STRUCTURAL_INTERACTION_LOCUS	HIGH	LYPLAL1	normal_artifact	.	86,5	106,20	0.062	0.163
chr1	220032361	TTA	T	INTRON	MODIFIER	EPRS	weak_evidence	.	101,0	75,12	0.009809	0.106
chr1	220106014	A	C	NON_SYNONYMOUS_CODING	MODERATE	IARS2	base_qual;strand_bias	.	217,0	180,32	0.004527	0.101
chr1	220253557	A	G	UPSTREAM	MODIFIER	MORF4L1P1	weak_evidence	.	10,0	17,2	0.081	0.142
chr1	220253577	G	C	INTRON	MODIFIER	RAB3GAP2	weak_evidence	.	12,0	21,2	0.071	0.119
chr1	220253734	G	A	INTRON	MODIFIER	RAB3GAP2	strand_bias;weak_evidence	.	21,0	28,2	0.043	0.094
chr1	221133979	C	T	EXON	MODIFIER	RP11-453O22.1	PASS	.	41,0	42,9	0.023	0.187
chr1	222476218	A	G	DOWNSTREAM	MODIFIER	RP11-378J18.9	normal_artifact	.	81,4	74,8	0.055	0.105
chr1	222641766	G	A	UPSTREAM	MODIFIER	MIA3	clustered_events;haplotype;strand_bias;weak_evidence	.	50,0	48,2	0.019	0.058
chr1	222641775	G	C	UPSTREAM	MODIFIER	MIA3	clustered_events;haplotype;strand_bias;weak_evidence	.	45,0	46,2	0.021	0.06
chr1	222641792	T	C	UPSTREAM	MODIFIER	MIA3	clustered_events;haplotype;weak_evidence	.	44,0	43,2	0.022	0.064
chr1	222722372	A	G	DOWNSTREAM	MODIFIER	BROX	normal_artifact	.	56,2	72,6	0.05	0.079
chr1	223005492	C	A	SYNONYMOUS_CODING	LOW	DISP1	normal_artifact	.	151,10	140,12	0.067	0.084
chr1	223113215	G	GT	INTRON	MODIFIER	TLR5	normal_artifact;slippage	STR	19,1	9,5	0.089	0.374
chr1	223544473	C	T	UPSTREAM	MODIFIER	CAPN8	weak_evidence	.	15,0	12,2	0.059	0.186
chr1	223746945	T	C	UPSTREAM	MODIFIER	CAPN2	normal_artifact	.	115,10	106,10	0.081	0.092
chr1	223755515	C	T	PROTEIN_STRUCTURAL_INTERACTION_LOCUS	HIGH	CAPN2	normal_artifact	.	113,13	123,9	0.104	0.064
chr1	224413202	C	CA	INTRON	MODIFIER	WDR26	haplotype;normal_artifact;weak_evidence	STR	88,10	127,7	0.069	0.048
chr1	224413217	CC	AA	INTRON	MODIFIER	WDR26	haplotype;normal_artifact	.	97,10	145,11	0.061	0.056
chr1	224433614	CTT	C	UPSTREAM	MODIFIER	CNIH3	normal_artifact;strand_bias	.	23,1	19,3	0.075	0.166
chr1	224433620	CTA	C	UPSTREAM	MODIFIER	CNIH3	base_qual;strand_bias;weak_evidence	.	28,0	24,2	0.033	0.106
chr1	224598154	T	C	INTRON	MODIFIER	CNIH3	weak_evidence	.	8,0	0,1	0.1	0.667
chr1	224877159	G	T	INTERGENIC	MODIFIER		PASS	.	8,0	4,3	0.1	0.444
chr1	224896396	A	G	INTRON	MODIFIER	DNAH14	normal_artifact	.	101,7	91,8	0.071	0.083
chr1	225419508	A	G	UPSTREAM	MODIFIER	LBR	normal_artifact	.	23,1	31,3	0.077	0.112
chr1	225519567	TG	T	UPSTREAM	MODIFIER	ENAH	normal_artifact	STR	30,2	53,12	0.065	0.15
chr1	226159258	T	G	NON_SYNONYMOUS_CODING	MODERATE	ACBD3	base_qual;strand_bias	.	101,0	112,16	0.00944	0.077
chr1	226548932	ACGG	A	CODON_CHANGE_PLUS_CODON_DELETION	MODERATE	STUM	normal_artifact;slippage;weak_evidence	STR	235,4	228,3	0.02	0.017
chr1	226601910	A	G	INTRON	MODIFIER	STUM	normal_artifact	.	149,10	141,9	0.067	0.063
chr1	226981985	AC	A	UPSTREAM	MODIFIER	COQ8A	normal_artifact	STR	203,15	189,54	0.057	0.211
chr1	226984034	TGG	T,TG	INTRON	MODIFIER	COQ8A	germline;normal_artifact	STR	51,0,57	66,4,71	8.434e-03,0.522	0.033,0.496
chr1	226986430	T	C	DOWNSTREAM	MODIFIER	CDC42BPA	normal_artifact	.	145,11	176,16	0.076	0.087
chr1	227016033	TC	T	INTRON	MODIFIER	CDC42BPA	weak_evidence	STR	55,0	89,7	0.018	0.072
chr1	227059189	CA	C,CAA	INTRON	MODIFIER	CDC42BPA	normal_artifact;slippage	STR	48,2,0	38,5,5	0.058,0.019	0.118,0.100
chr1	227141876	G	A	INTRON	MODIFIER	CDC42BPA	germline;weak_evidence	.	8,0	2,1	0.1	0.414
chr1	227411206	GA	CG	INTRON	MODIFIER	CTD-2090I13.1	haplotype;map_qual;weak_evidence	.	23,0	23,2	0.04	0.111
chr1	227411221	AT	GG	INTRON	MODIFIER	CTD-2090I13.1	base_qual;haplotype;map_qual	.	25,0	22,2	0.037	0.115
chr1	227456622	C	A	INTERGENIC	MODIFIER		germline	.	8,0	2,2	0.1	0.5
chr1	227655378	CT	C	FRAME_SHIFT	HIGH	ZNF678	normal_artifact	.	404,33	410,15	0.074	0.036
chr1	227843789	G	T	INTRON	MODIFIER	PRSS38	weak_evidence	.	8,0	1,2	0.1	0.599
chr1	227947990	G	C	UPSTREAM	MODIFIER	WNT9A	normal_artifact;weak_evidence	.	19,1	15,3	0.091	0.198
chr1	227968742	G	C	INTERGENIC	MODIFIER		map_qual;normal_artifact;weak_evidence	.	40,1	22,3	0.045	0.147
chr1	227968845	C	G	INTERGENIC	MODIFIER		clustered_events;map_qual;strand_bias;weak_evidence	.	39,0	35,3	0.024	0.1
chr1	227968899	C	G,T	INTERGENIC	MODIFIER		clustered_events;map_qual;multiallelic;strand_bias	.	32,0,4	40,3,5	0.025,0.128	0.079,0.117
chr1	227968914	C	G	INTERGENIC	MODIFIER		clustered_events;map_qual;strand_bias	.	37,0	44,3	0.026	0.082
chr1	227972157	C	G	DOWNSTREAM	MODIFIER	CICP26	normal_artifact;weak_evidence	.	25,1	23,2	0.071	0.111
chr1	227973766	TGG	CCA	DOWNSTREAM	MODIFIER	CICP26	clustered_events;haplotype;normal_artifact	.	60,2	52,6	0.047	0.117
chr1	227973779	G	A	DOWNSTREAM	MODIFIER	CICP26	clustered_events;haplotype;normal_artifact	.	63,2	58,4	0.045	0.078
chr1	227973781	C	T	DOWNSTREAM	MODIFIER	CICP26	clustered_events;haplotype;normal_artifact	.	63,2	61,4	0.045	0.075
chr1	228315934	A	G	NON_SYNONYMOUS_CODING	MODERATE	OBSCN	normal_artifact	.	243,14	222,27	0.058	0.111
chr1	228317454	T	C	INTRON	MODIFIER	OBSCN	normal_artifact	.	155,8	147,25	0.055	0.147
chr1	228342423	G	A	INTRON	MODIFIER	OBSCN	normal_artifact	.	93,7	66,8	0.076	0.118
chr1	228360293	T	A	SYNONYMOUS_CODING	LOW	OBSCN	PASS	.	245,1	234,15	0.008024	0.06
chr1	228376762	C	T	INTRON	MODIFIER	OBSCN	normal_artifact	.	312,16	308,26	0.049	0.079
chr1	228409077	A	AC	FRAME_SHIFT	HIGH	TRIM17	normal_artifact;slippage	STR	174,15	190,24	0.067	0.091
chr1	228411211	A	G	UPSTREAM	MODIFIER	TRIM11	normal_artifact	.	193,13	160,46	0.066	0.223
chr1	228458655	CGTGT	C,CGT	UPSTREAM	MODIFIER	HIST3H2A	germline;multiallelic;normal_artifact	STR	37,2,17	29,5,21	0.049,0.291	0.102,0.370
chr1	229021245	CTCT	C	DOWNSTREAM	MODIFIER	RP5-1065P14.3	slippage;weak_evidence	STR	10,0	21,3	0.072	0.15
chr1	229275913	A	G	UPSTREAM	MODIFIER	RP5-1061H20.4	weak_evidence	.	9,0	3,2	0.091	0.428
chr1	229431440	G	GC	UTR_3_PRIME	MODIFIER	ACTA1	germline;normal_artifact	STR	22,1	24,10	0.079	0.298
chr1	230063047	T	C	UPSTREAM	MODIFIER	GALNT2	weak_evidence	.	8,0	1,1	0.1	0.5
chr1	230332904	A	G	NON_SYNONYMOUS_CODING	MODERATE	PGBD5	normal_artifact	.	208,21	227,18	0.091	0.075
chr1	230476677	TA	T	INTERGENIC	MODIFIER		slippage;weak_evidence	STR	10,0	8,7	0.084	0.463
chr1	230663212	GA	G	DOWNSTREAM	MODIFIER	COG2	normal_artifact;slippage	STR	55,7	58,7	0.095	0.119
chr1	230929054	AG	A	FRAME_SHIFT	HIGH	TTC13	normal_artifact	STR	81,7	81,22	0.082	0.2
chr1	231118127	A	G	EXON	MODIFIER	RP5-1097F14.1	normal_artifact	.	116,6	132,15	0.056	0.107
chr1	231163724	AGCC	A	CODON_CHANGE_PLUS_CODON_DELETION	MODERATE	TRIM67	normal_artifact;slippage;weak_evidence	STR	180,2	161,6	0.016	0.039
chr1	231317499	C	A	INTERGENIC	MODIFIER		weak_evidence	.	8,0	3,2	0.1	0.427
chr1	231353137	GT	G	DOWNSTREAM	MODIFIER	SPRTN	normal_artifact	STR	129,9	117,20	0.066	0.143
chr1	231585831	G	A	INTRON	MODIFIER	TSNAX-DISC1	weak_evidence	.	12,0	2,2	0.07	0.5
chr1	232403756	A	T	UPSTREAM	MODIFIER	SIPA1L2	PASS	.	17,0	23,8	0.051	0.273
chr1	232428418	C	T	NON_SYNONYMOUS_CODING	MODERATE	SIPA1L2	normal_artifact	.	51,3	70,10	0.069	0.132
chr1	232514891	TG	T	FRAME_SHIFT	HIGH	SIPA1L2	normal_artifact	STR	182,19	172,16	0.08	0.083
chr1	232986617	C	A	UPSTREAM	MODIFIER	PCNX2	normal_artifact	.	61,5	41,10	0.088	0.207
chr1	233095700	C	T	INTRON	MODIFIER	PCNX2	normal_artifact	.	60,4	53,7	0.074	0.129
chr1	233353959	TTG	T	INTRON	MODIFIER	RP5-862P8.2	normal_artifact;slippage;strand_bias;weak_evidence	STR	63,3	84,3	0.058	0.044
chr1	233617636	G	T	INTRON	MODIFIER	KCNK1	weak_evidence	.	8,0	2,2	0.1	0.499
chr1	233836209	C	T	EXON	MODIFIER	RP11-301G21.1	clustered_events	.	12,0	9,5	0.071	0.363
chr1	233836237	T	C	EXON	MODIFIER	RP11-301G21.1	clustered_events	.	17,0	11,3	0.052	0.248
chr1	233836272	A	T	EXON	MODIFIER	RP11-301G21.1	clustered_events;haplotype	.	27,0	22,3	0.034	0.148
chr1	233836285	G	A	EXON	MODIFIER	RP11-301G21.1	clustered_events;haplotype	.	29,0	24,3	0.032	0.138
chr1	233836300	T	G	EXON	MODIFIER	RP11-301G21.1	clustered_events;haplotype	.	28,0	26,3	0.033	0.129
chr1	233836310	T	C	EXON	MODIFIER	RP11-301G21.1	clustered_events;haplotype	.	29,0	27,3	0.031	0.125
chr1	234309113	AT	A	DOWNSTREAM	MODIFIER	MIR4671	normal_artifact	STR	89,4	84,8	0.041	0.08
chr1	234326015	GA	G	DOWNSTREAM	MODIFIER	SLC35F3	germline;weak_evidence	STR	9,0	7,2	0.084	0.271
chr13	102747413	T	C	NON_SYNONYMOUS_CODING	MODERATE	CCDC168	PASS	.	91,1	92,22	0.02	0.198
chr1	234609544	GCGC	G	UPSTREAM	MODIFIER	IRF2BP2	slippage;weak_evidence	STR	17,0	20,2	0.046	0.122
chr1	234950531	A	G	INTERGENIC	MODIFIER		weak_evidence	.	9,0	3,2	0.091	0.427
chr1	235687156	AT	A	INTRON	MODIFIER	LYST	slippage;weak_evidence	STR	30,1	30,4	0.038	0.125
chr1	235702797	G	A	STOP_GAINED	HIGH	LYST	normal_artifact	.	155,4	157,13	0.031	0.081
chr1	235728337	TA	T	UPSTREAM	MODIFIER	LYST	normal_artifact;slippage	STR	19,1	19,8	0.087	0.301
chr1	236013693	A	AC	INTRON	MODIFIER	NID1	weak_evidence	STR	52,0	45,7	0.018	0.13
chr1	236099417	G	T	INTERGENIC	MODIFIER		weak_evidence	.	9,0	1,2	0.092	0.599
chr1	236235932	CT	C	INTRON	MODIFIER	ERO1B	normal_artifact;slippage	STR	23,2	22,4	0.063	0.179
chr1	236483209	T	C	UTR_3_PRIME	MODIFIER	EDARADD	fragment	.	9,0	11,3	0.092	0.251
chr1	236484362	T	C	UTR_3_PRIME	MODIFIER	EDARADD	weak_evidence	.	33,0	23,3	0.028	0.141
chr1	236484458	CCA	TTG	UTR_3_PRIME	MODIFIER	EDARADD	PASS	.	17,0	12,3	0.052	0.234
chr1	236484492	A	G	UTR_3_PRIME	MODIFIER	EDARADD	PASS	.	13,0	9,2	0.067	0.231
chr1	236565913	G	A	INTRON	MODIFIER	HEATR1	normal_artifact	.	177,6	210,20	0.038	0.087
chr1	236568885	TAA	T	INTRON	MODIFIER	HEATR1	germline;normal_artifact	STR	27,2	28,10	0.096	0.237
chr1	236603293	T	C	NON_SYNONYMOUS_CODING	MODERATE	HEATR1	normal_artifact	.	166,16	156,9	0.091	0.054
chr1	236831996	C	T	NON_SYNONYMOUS_CODING	MODERATE	MTR	normal_artifact	.	148,10	127,22	0.068	0.151
chr1	236861072	AT	A	INTRON	MODIFIER	MTR	normal_artifact;slippage	STR	51,2	23,8	0.055	0.252
chr1	236874698	CTTT	C	INTRON	MODIFIER	MTR	normal_artifact	STR	82,3	66,14	0.014	0.141
chr1	237246352	T	TC	INTRON	MODIFIER	RYR2	weak_evidence	STR	8,0	0,1	0.101	0.667
chr1	237341466	AT	A	INTRON	MODIFIER	RYR2	normal_artifact	STR	92,4	72,7	0.052	0.098
chr1	237388081	T	G	INTRON	MODIFIER	RYR2	normal_artifact	.	120,5	88,12	0.046	0.126
chr1	237454511	G	A	SYNONYMOUS_CODING	LOW	RYR2	normal_artifact	.	75,4	61,4	0.06	0.074
chr1	237625660	G	T	SPLICE_SITE_ACCEPTOR	HIGH	RYR2	normal_artifact	.	53,4	40,5	0.084	0.126
chr1	237628095	T	C	INTRON	MODIFIER	RYR2	normal_artifact	.	89,4	80,5	0.051	0.061
chr1	237631470	A	C	NON_SYNONYMOUS_CODING	MODERATE	RYR2	base_qual;strand_bias	.	75,1	54,16	0.014	0.181
chr1	237660892	A	G	NON_SYNONYMOUS_CODING	MODERATE	RYR2	normal_artifact	.	74,7	67,6	0.081	0.092
chr1	238397848	G	C	INTERGENIC	MODIFIER		weak_evidence	.	9,0	3,2	0.091	0.427
chr1	240123505	CAAAAA	C,CA,CAA	INTRON	MODIFIER	FMN2	germline;multiallelic;weak_evidence	STR	7,0,0,1	4,2,3,3	0.073,0.075,0.118	0.185,0.266,0.237
chr1	240144624	C	A	INTRON	MODIFIER	FMN2	normal_artifact	.	58,2	47,8	0.046	0.157
chr1	240258052	T	A	INTRON	MODIFIER	FMN2	normal_artifact	.	62,2	54,6	0.045	0.104
chr1	240493541	AT	A,ATT	INTRON	MODIFIER	GREM2	germline;multiallelic;normal_artifact	STR	30,61,9	36,48,8	0.600,0.096	0.532,0.079
chr1	240800552	AAC	A	INTRON	MODIFIER	RGS7	normal_artifact;slippage;weak_evidence	STR	126,5	94,3	0.042	0.038
chr1	240803024	T	C	INTRON	MODIFIER	RGS7	normal_artifact	.	46,1	42,8	0.04	0.173
chr1	240813777	G	A	INTRON	MODIFIER	RGS7	weak_evidence	.	30,0	22,2	0.031	0.114
chr1	240823354	G	T	INTRON	MODIFIER	RGS7	strand_bias;weak_evidence	.	38,0	36,2	0.025	0.075
chr1	240827176	G	T	UPSTREAM	MODIFIER	RFKP1	normal_artifact	.	163,6	155,14	0.036	0.087
chr1	241143363	T	C	INTRON	MODIFIER	RGS7	weak_evidence	.	10,0	3,2	0.081	0.428
chr1	241548810	AT	A	UPSTREAM	MODIFIER	KMO	normal_artifact;slippage	STR	54,1	36,6	0.035	0.149
chr1	241671155	A	T	STOP_GAINED	HIGH	WDR64	normal_artifact	.	61,5	59,8	0.086	0.129
chr1	241783571	G	A	INTRON	MODIFIER	WDR64	PASS	.	17,0	13,2	0.053	0.177
chr1	241998384	CA	C	DOWNSTREAM	MODIFIER	CFL1P4	normal_artifact	STR	101,2	78,8	0.028	0.095
chr1	242089923	G	A	SYNONYMOUS_CODING	LOW	PLD5	PASS	.	102,0	101,16	0.009474	0.142
chr1	244409551	C	A	UTR_3_PRIME	MODIFIER	ADSS	normal_artifact	.	31,1	43,8	0.059	0.169
chr1	244686250	C	CTG	INTRON	MODIFIER	DESI2	germline;slippage;weak_evidence	STR	11,0	12,3	0.077	0.234
chr1	244887284	CT	C	INTERGENIC	MODIFIER		slippage;weak_evidence	STR	8,0	3,3	0.103	0.491
chr1	246063932	G	A	INTRON	MODIFIER	SMYD3	germline	.	9,0	2,4	0.091	0.625
chr1	246506994	CCCCT	C	DOWNSTREAM	MODIFIER	RP11-690C23.4	normal_artifact	.	54,5	52,17	0.096	0.238
chr1	246849919	T	C	SYNONYMOUS_CODING	LOW	AHCTF1	normal_artifact	.	130,5	140,11	0.043	0.077
chr1	247021346	G	T	DOWNSTREAM	MODIFIER	RP11-551G24.3	weak_evidence	.	8,0	2,2	0.1	0.501
chr1	247123796	GA	G	UTR_3_PRIME	MODIFIER	ZNF124	normal_artifact;strand_bias	.	83,1	83,4	0.023	0.056
chr1	247156606	GT	G	FRAME_SHIFT	HIGH	ZNF124	normal_artifact;weak_evidence	STR	107,9	101,10	0.066	0.075
chr1	247329298	A	G	NON_SYNONYMOUS_CODING	MODERATE	ZNF496	normal_artifact	.	236,24	244,37	0.094	0.134
chr1	247424766	G	A	SYNONYMOUS_CODING	LOW	NLRP3	normal_artifact	.	523,30	523,55	0.055	0.096
chr1	247429681	T	C	SYNONYMOUS_CODING	LOW	NLRP3	PASS	.	175,0	121,16	0.005667	0.122
chr1	247566033	T	C	INTRON	MODIFIER	GCSAML	weak_evidence	.	25,0	29,2	0.037	0.091
chr1	247815388	C	A	SYNONYMOUS_CODING	LOW	OR14A16	PASS	.	82,0	54,7	0.012	0.12
chr1	247934159	C	T	NON_SYNONYMOUS_CODING	MODERATE	OR2AJ1	normal_artifact	.	174,16	164,12	0.085	0.068
chr1	247949492	G	C	NON_SYNONYMOUS_CODING	MODERATE	OR2L8	normal_artifact	.	331,15	324,18	0.046	0.053
chr1	247978155	G	A	DOWNSTREAM	MODIFIER	OR2L9P	weak_evidence	.	11,0	6,2	0.077	0.3
chr1	247991166	T	C	EXON	MODIFIER	OR2L1P	normal_artifact	.	301,27	326,27	0.083	0.076
chr1	248003828	A	G	EXON	MODIFIER	OR2L6P	haplotype;normal_artifact;strand_bias	.	282,19	287,9	0.065	0.034
chr1	248003835	G	A	EXON	MODIFIER	OR2L6P	haplotype;normal_artifact;strand_bias	.	280,16	296,9	0.057	0.033
chr1	248061293	C	T	SYNONYMOUS_CODING	LOW	OR2L3	map_qual;normal_artifact;weak_evidence	.	258,2	264,5	0.011	0.018
chr1	248084443	GC	G	EXON	MODIFIER	OR2T32P	haplotype;normal_artifact;strand_bias;weak_evidence	STR	141,3	137,3	0.027	0.028
chr1	248084445	C	T	EXON	MODIFIER	OR2T32P	haplotype;normal_artifact;strand_bias;weak_evidence	.	143,3	141,3	0.027	0.027
chr1	248273610	T	C	NON_SYNONYMOUS_CODING	MODERATE	OR2T33	map_qual;normal_artifact;strand_bias	.	128,12	156,12	0.091	0.076
chr1	248816962	CAG	C	UPSTREAM	MODIFIER	SH3BP5L	slippage;weak_evidence	STR	126,0	101,4	0.007543	0.043
chr1	248818047	G	T	UPSTREAM	MODIFIER	SH3BP5L	weak_evidence	.	8,0	0,1	0.1	0.667
chr2	263884	C	A	UPSTREAM	MODIFIER	ACP1	normal_artifact	.	195,9	201,18	0.048	0.081
chr2	287761	GC	G	FRAME_SHIFT	HIGH	FAM150B	normal_artifact	STR	47,2	58,8	0.046	0.126
chr2	546072	G	A	INTRON	MODIFIER	AC093326.2	germline	.	9,0	2,3	0.091	0.573
chr2	909707	C	G	UPSTREAM	MODIFIER	AC113607.2	map_qual;normal_artifact	.	127,10	144,13	0.075	0.088
chr2	1143792	G	C	INTRON	MODIFIER	SNTG2	weak_evidence	.	8,0	0,2	0.101	0.75
chr2	1649467	G	A	SYNONYMOUS_CODING	LOW	PXDN	normal_artifact	.	230,15	218,16	0.064	0.07
chr2	1652727	T	C	INTRON	MODIFIER	PXDN	weak_evidence	.	9,0	2,1	0.088	0.4
chr2	2219825	T	A	INTRON	MODIFIER	MYT1L	weak_evidence	.	12,0	6,3	0.072	0.363
chr2	3388439	GC	G	FRAME_SHIFT	HIGH	TRAPPC12	normal_artifact	STR	345,36	364,30	0.092	0.068
chr2	3558259	A	C	START_LOST	HIGH	RNASEH1	base_qual;normal_artifact;strand_bias	.	183,23	189,36	0.065	0.109
chr2	3928718	G	T	INTERGENIC	MODIFIER		germline	.	8,0	5,4	0.1	0.454
chr2	5143510	T	C	INTERGENIC	MODIFIER		germline	.	9,0	5,3	0.091	0.4
chr2	5693393	GGAC	G	UPSTREAM	MODIFIER	LINC01248	normal_artifact;slippage;weak_evidence	STR	81,3	91,5	0.046	0.058
chr2	6877746	A	G	START_GAINED	LOW	RSAD2	normal_artifact	.	89,5	55,5	0.063	0.096
chr2	6990385	TACACACACACACACAC	T,TACAC	INTRON	MODIFIER	RNF144A	germline;weak_evidence	STR	8,0,2	7,2,2	0.072,0.214	0.206,0.203
chr2	8747790	T	C	INTRON	MODIFIER	KIDINS220	normal_artifact	.	41,1	36,6	0.045	0.16
chr2	9269042	C	A	DOWNSTREAM	MODIFIER	EIF1P7	weak_evidence	.	8,0	0,2	0.1	0.75
chr2	9400824	G	A	SYNONYMOUS_CODING	LOW	ASAP2	normal_artifact	.	179,14	148,49	0.076	0.249
chr2	9954891	G	GT	INTRON	MODIFIER	GRHL1	normal_artifact;slippage;weak_evidence	STR	116,3	113,7	0.018	0.056
chr2	10066001	T	C	INTRON	MODIFIER	CYS1	normal_artifact	.	108,6	101,24	0.059	0.194
chr2	10455405	CT	C	DOWNSTREAM	MODIFIER	RP11-320M2.1	normal_artifact	STR	186,9	172,19	0.046	0.095
chr2	10577608	TA	T	INTRON	MODIFIER	NOL10	PASS	STR	82,0	83,11	0.012	0.114
chr2	10601714	T	C	INTRON	MODIFIER	NOL10	weak_evidence	.	10,0	0,1	0.083	0.684
chr22	29512074	G	A	NON_SYNONYMOUS_CODING	MODERATE	THOC5	PASS	.	131,0	114,28	0.007537	0.196
chr2	10640926	T	C	INTRON	MODIFIER	NOL10	weak_evidence	.	8,0	0,1	0.1	0.667
chr2	10677832	A	G	INTRON	MODIFIER	NOL10	weak_evidence	.	8,0	2,1	0.1	0.4
chr2	10913313	G	A	NON_SYNONYMOUS_CODING	MODERATE	KCNF1	normal_artifact	.	238,20	254,26	0.078	0.092
chr2	11133310	GCA	G	UPSTREAM	MODIFIER	AC062028.1	normal_artifact;slippage	STR	247,22	267,23	0.073	0.07
chr2	11576307	CAAA	C,CAAAA	INTRON	MODIFIER	GREB1	germline;multiallelic;normal_artifact	STR	23,27,1	23,29,5	0.507,0.038	0.494,0.102
chr2	11580759	C	T	SYNONYMOUS_CODING	LOW	GREB1	normal_artifact	.	248,22	308,41	0.081	0.118
chr2	11585053	GAA	G,GA,GAAA	DOWNSTREAM	MODIFIER	GREB1	germline;multiallelic;normal_artifact	STR	44,55,7,14	46,46,13,13	0.448,0.069,0.101	0.390,0.091,0.095
chr2	11597830	G	A	SYNONYMOUS_CODING	LOW	GREB1	normal_artifact	.	114,10	135,15	0.077	0.102
chr2	12723487	C	T	SYNONYMOUS_CODING	LOW	TRIB2	normal_artifact	.	171,16	183,19	0.089	0.094
chr2	12828309	G	A	INTERGENIC	MODIFIER		weak_evidence	.	8,0	3,2	0.094	0.439
chr2	15595444	AT	A	UPSTREAM	MODIFIER	DDX1	PASS	STR	89,0	61,16	0.011	0.194
chr2	15934982	A	G	DOWNSTREAM	MODIFIER	MYCNOS	weak_evidence	.	9,0	0,2	0.091	0.75
chr2	15940687	G	C	UTR_5_PRIME	MODIFIER	MYCN	haplotype;normal_artifact;strand_bias	.	53,4	38,7	0.077	0.141
chr2	15940691	A	C	UTR_5_PRIME	MODIFIER	MYCN	haplotype;normal_artifact;strand_bias	.	53,3	40,6	0.067	0.13
chr2	15940974	CG	C	DOWNSTREAM	MODIFIER	MYCNUT	normal_artifact	STR	207,6	149,24	0.018	0.135
chr2	15941111	AG	A	INTRON	MODIFIER	MYCNOS	normal_artifact	STR	106,9	119,13	0.079	0.093
chr2	15945892	T	C	NON_SYNONYMOUS_CODING	MODERATE	MYCN	normal_artifact	.	233,20	218,34	0.081	0.137
chr2	16284190	A	G	INTERGENIC	MODIFIER		weak_evidence	.	10,0	1,1	0.083	0.5
chr2	16345331	A	G	INTERGENIC	MODIFIER		weak_evidence	.	9,0	0,2	0.091	0.75
chr2	17187955	G	A	INTERGENIC	MODIFIER		weak_evidence	.	8,0	1,1	0.1	0.5
chr2	17770929	AT	A	UPSTREAM	MODIFIER	GEN1	normal_artifact;slippage	STR	47,5	35,13	0.097	0.261
chr2	17931508	T	C	NON_SYNONYMOUS_CODING	MODERATE	KCNS3	normal_artifact	.	329,25	250,35	0.071	0.124
chr2	19913779	TA	T	INTRON	MODIFIER	WDR35	slippage;weak_evidence	STR	40,0	25,3	0.023	0.134
chr2	19930427	A	G	SYNONYMOUS_CODING	LOW	WDR35	normal_artifact	.	119,6	109,8	0.054	0.074
chr2	19994213	C	T	UPSTREAM	MODIFIER	WDR35	normal_artifact	.	56,2	44,15	0.049	0.263
chr2	20102728	G	GAA	INTRON	MODIFIER	AC098828.2	normal_artifact;weak_evidence	.	45,3	34,5	0.076	0.141
chr2	20102763	A	AGAAGAC	INTRON	MODIFIER	AC098828.2	normal_artifact;weak_evidence	.	76,7	66,6	0.092	0.093
chr2	20203270	G	A	DOWNSTREAM	MODIFIER	SDC1	normal_artifact	.	169,15	176,27	0.086	0.134
chr2	20278832	TA	T	INTRON	MODIFIER	PUM2	slippage;weak_evidence	STR	79,0	78,7	0.012	0.071
chr2	20318462	TA	T	INTRON	MODIFIER	PUM2	slippage	STR	57,1	72,19	0.033	0.19
chr2	20402036	C	T	UPSTREAM	MODIFIER	RNA5SP86	germline	.	8,0	2,7	0.1	0.726
chr2	20425653	ACAG	A	INTERGENIC	MODIFIER		slippage;weak_evidence	STR	46,0	56,5	0.02	0.093
chr2	20443760	C	T	UPSTREAM	MODIFIER	RHOB	weak_evidence	.	8,0	2,2	0.097	0.499
chr2	20479931	ACTG	A,ACTGCTG	UPSTREAM	MODIFIER	Y_RNA	germline;normal_artifact;slippage	STR	12,0,15	15,2,19	0.030,0.534	0.075,0.514
chr2	20685500	G	A	UTR_3_PRIME	MODIFIER	LDAH	PASS	.	116,1	76,18	0.015	0.196
chr2	21043879	CCAG	C	CODON_DELETION	MODERATE	APOB	normal_artifact;slippage;weak_evidence	STR	34,1	31,3	0.052	0.108
chr2	21137941	T	C	SYNONYMOUS_CODING	LOW	TDRD15	normal_artifact	.	145,7	153,23	0.051	0.134
chr2	23856514	C	T	INTRON	MODIFIER	ATAD2B	normal_artifact	.	67,4	71,5	0.059	0.076
chr2	24022207	T	C	DOWNSTREAM	MODIFIER	MFSD2B	PASS	.	80,1	48,15	0.024	0.243
chr2	24024130	C	A	NON_SYNONYMOUS_CODING	MODERATE	MFSD2B	weak_evidence	.	113,0	127,3	0.008457	0.03
chr2	24079491	TA	T	FRAME_SHIFT	HIGH	TP53I3	normal_artifact	STR	93,7	73,14	0.072	0.157
chr2	24119555	A	C	UPSTREAM	MODIFIER	RP11-507M3.1	normal_artifact	.	48,4	40,6	0.091	0.146
chr2	24706799	C	T	SYNONYMOUS_CODING	LOW	NCOA1	normal_artifact	.	148,10	175,18	0.067	0.094
chr2	25130147	A	G	INTRON	MODIFIER	EFR3B	normal_artifact	.	185,10	185,31	0.055	0.146
chr2	25161399	G	A	SYNONYMOUS_CODING	LOW	POMC	normal_artifact	.	276,29	253,64	0.085	0.194
chr2	25771546	GA	G	INTRON	MODIFIER	ASXL2	normal_artifact;slippage	STR	147,7	163,16	0.043	0.066
chr2	25798478	G	A	INTRON	MODIFIER	ASXL2	weak_evidence	.	8,0	12,3	0.097	0.236
chr2	25799434	ACTG	A	CODON_CHANGE_PLUS_CODON_DELETION	MODERATE	ASXL2	slippage	STR	131,0	148,6	0.007259	0.044
chr2	25799558	A	T	INTRON	MODIFIER	ASXL2	normal_artifact	.	96,4	99,11	0.049	0.101
chr2	25856621	C	T	INTRON	MODIFIER	ASXL2	normal_artifact	.	71,2	71,6	0.037	0.087
chr2	25969947	C	CAATGTTAAAAAATCCTTTAACTTTTT	INTRON	MODIFIER	KIF3C	weak_evidence	.	8,0	3,1	0.096	0.333
chr2	26280259	TA	T,TAA	DOWNSTREAM	MODIFIER	HADHB	multiallelic;slippage	STR	17,0,2	15,5,4	0.042,0.079	0.197,0.184
chr2	26311395	A	G	NON_SYNONYMOUS_CODING	MODERATE	ADGRF3	normal_artifact	.	304,24	325,40	0.072	0.11
chr2	26459944	ATG	A	DOWNSTREAM	MODIFIER	DRC1	normal_artifact;slippage	STR	108,4	83,10	0.044	0.111
chr2	26778539	C	A	UTR_3_PRIME	MODIFIER	SLC35F6	PASS	.	90,0	60,4	0.011	0.066
chr2	26948461	G	A	UTR_3_PRIME	MODIFIER	DPYSL5	germline	.	9,0	5,3	0.091	0.399
chr2	27067683	G	A	UPSTREAM	MODIFIER	RP11-195B17.1	normal_artifact	.	160,10	156,15	0.063	0.091
chr2	27128599	G	T	NON_SYNONYMOUS_CODING	MODERATE	ABHD1	normal_artifact	.	121,14	108,13	0.098	0.109
chr2	27206073	G	A	SYNONYMOUS_CODING	LOW	SLC5A6	normal_artifact	.	149,16	149,22	0.1	0.131
chr2	27235591	T	G	NON_SYNONYMOUS_CODING	MODERATE	CAD	normal_artifact	.	213,11	209,26	0.052	0.11
chr2	27257897	G	A	UPSTREAM	MODIFIER	SLC30A3	normal_artifact	.	252,16	266,26	0.061	0.089
chr2	27280009	T	TC	UPSTREAM	MODIFIER	TRIM54	normal_artifact;weak_evidence	STR	41,3	38,4	0.042	0.115
chr2	27283035	G	A	DOWNSTREAM	MODIFIER	DNAJC5G	normal_artifact;weak_evidence	.	55,3	53,4	0.055	0.083
chr2	27435150	AC	A	UPSTREAM	MODIFIER	NRBP1	normal_artifact	STR	197,19	197,45	0.077	0.175
chr2	27437234	CT	C	UPSTREAM	MODIFIER	NRBP1	normal_artifact;slippage	STR	69,5	58,10	0.064	0.134
chr2	27454303	C	A	UPSTREAM	MODIFIER	IFT172	normal_artifact	.	160,8	118,7	0.052	0.063
chr2	27601481	CTT	C,CT	DOWNSTREAM	MODIFIER	ZNF512	germline;multiallelic;normal_artifact	STR	22,1,12	26,3,4	0.052,0.343	0.110,0.144
chr2	27722918	T	TTTATTA	INTERGENIC	MODIFIER		germline;weak_evidence	STR	10,0	2,2	0.081	0.5
chr2	27779411	AT	A	DOWNSTREAM	MODIFIER	RBKS	normal_artifact;slippage	STR	83,9	81,13	0.074	0.13
chr2	28543270	T	C	SPLICE_SITE_DONOR	HIGH	PLB1	normal_artifact	.	185,17	195,23	0.084	0.107
chr2	28593947	CTTT	C,CT,CTT,CTTTT,CTTTTT	DOWNSTREAM	MODIFIER	PLB1	germline;multiallelic;normal_artifact	STR	6,1,12,22,11,26	4,6,12,18,6,8	0.021,0.146,0.295,0.135,0.336	0.115,0.189,0.352,0.109,0.152
chr2	28701927	T	C	INTERGENIC	MODIFIER		weak_evidence	.	8,0	3,2	0.1	0.428
chr2	28752118	C	T	START_GAINED	LOW	PPP1CB	normal_artifact	.	136,9	116,9	0.067	0.079
chr2	28785359	C	T	INTRON	MODIFIER	PPP1CB	weak_evidence	.	9,0	2,2	0.092	0.499
chr2	29003346	T	A	INTRON	MODIFIER	FAM179A	normal_artifact;strand_bias	.	90,8	81,10	0.089	0.113
chr2	29014347	G	A	UPSTREAM	MODIFIER	FAM179A	normal_artifact	.	68,2	84,10	0.03	0.112
chr2	29296722	AGT	A,AGTGTGTGT	INTRON	MODIFIER	ALK	germline;multiallelic;normal_artifact;slippage	STR	14,0,13	15,3,15	0.033,0.463	0.109,0.443
chr2	29496952	C	T	INTRON	MODIFIER	ALK	germline	.	9,0	4,3	0.091	0.445
chr2	30231866	G	A	UPSTREAM	MODIFIER	LBH	normal_artifact	.	75,3	74,7	0.049	0.096
chr2	30232233	CG	C	UPSTREAM	MODIFIER	LBH	normal_artifact;weak_evidence	STR	23,1	25,3	0.071	0.132
chr2	31137852	C	T	INTRON	MODIFIER	GALNT14	normal_artifact	.	223,13	200,18	0.059	0.086
chr2	31201789	C	A	INTRON	MODIFIER	CAPN14	normal_artifact	.	79,5	68,17	0.061	0.206
chr2	31266287	G	A	SYNONYMOUS_CODING	LOW	EHD3	normal_artifact	.	172,11	128,18	0.064	0.127
chr2	31526416	C	T	UPSTREAM	MODIFIER	AL133247.2	weak_evidence	.	14,0	11,2	0.061	0.2
chr2	32509973	G	A	NON_SYNONYMOUS_CODING	MODERATE	BIRC6	normal_artifact	.	87,7	53,11	0.082	0.181
chr2	32947621	ACCG	A	UPSTREAM	MODIFIER	Y_RNA	slippage;weak_evidence	STR	82,0	97,2	0.011	0.029
chr2	33259635	CT	C	INTRON	MODIFIER	LTBP1	normal_artifact;slippage	STR	87,6	95,14	0.037	0.1
chr2	33840022	G	A	INTRON	MODIFIER	LINC01317	clustered_events;haplotype;weak_evidence	.	32,0	31,2	0.029	0.086
chr2	33840030	T	C	INTRON	MODIFIER	LINC01317	clustered_events;haplotype;weak_evidence	.	33,0	28,2	0.029	0.094
chr2	33840038	T	C	INTRON	MODIFIER	LINC01317	clustered_events;haplotype;weak_evidence	.	32,0	25,2	0.029	0.103
chr2	33840048	G	C	INTRON	MODIFIER	LINC01317	clustered_events;haplotype;weak_evidence	.	25,0	23,2	0.037	0.111
chr2	37028819	CA	C	FRAME_SHIFT	HIGH	HEATR5B	normal_artifact	STR	145,17	160,11	0.096	0.057
chr2	37220315	CAAA	C,CAA	DOWNSTREAM	MODIFIER	CEBPZOS	germline;normal_artifact	STR	20,1,8	22,2,7	0.064,0.274	0.094,0.238
chr2	37247222	AT	A	DOWNSTREAM	MODIFIER	PRKD3	slippage;weak_evidence	STR	36,0	34,5	0.027	0.133
chr2	37277728	C	T	DOWNSTREAM	MODIFIER	PRKD3	normal_artifact	.	34,1	32,4	0.054	0.131
chr2	37817311	AG	GA	EXON	MODIFIER	AC010878.3	clustered_events	.	26,0	31,3	0.036	0.111
chr2	37817334	C	T	EXON	MODIFIER	AC010878.3	clustered_events;weak_evidence	.	22,0	27,2	0.041	0.096
chr2	37817352	AAG	A	EXON	MODIFIER	AC010878.3	clustered_events;haplotype;weak_evidence	.	20,0	27,2	0.045	0.096
chr2	37817357	TC	T	EXON	MODIFIER	AC010878.3	clustered_events;haplotype;weak_evidence	STR	20,0	27,2	0.045	0.097
chr2	37817361	A	G	EXON	MODIFIER	AC010878.3	clustered_events;haplotype;weak_evidence	.	19,0	26,2	0.048	0.1
chr2	38012589	AT	A	INTRON	MODIFIER	RMDN2-AS1	normal_artifact	STR	93,6	60,12	0.047	0.16
chr2	38074824	C	T	PROTEIN_STRUCTURAL_INTERACTION_LOCUS	HIGH	CYP1B1	normal_artifact;strand_bias	.	114,9	123,4	0.079	0.038
chr2	38300255	ACT	A	INTRON	MODIFIER	ATL2	normal_artifact;slippage	STR	89,3	92,9	0.037	0.092
chr2	38481925	A	G	INTRON	MODIFIER	AC016995.3	clustered_events;haplotype;normal_artifact	.	196,1	206,9	0.01	0.046
chr2	38481937	C	T	INTRON	MODIFIER	AC016995.3	clustered_events;haplotype;normal_artifact	.	209,1	229,9	0.009334	0.042
chr2	38482002	TC	CT	INTRON	MODIFIER	AC016995.3	clustered_events;normal_artifact	.	353,1	397,7	0.005566	0.02
chr2	38482097	T	C	INTRON	MODIFIER	AC016995.3	PASS	.	513,0	597,11	0.001919	0.019
chr2	38482467	AA	TC	INTRON	MODIFIER	AC016995.3	strand_bias	.	272,0	253,5	0.003561	0.023
chr2	38565968	GT	G	INTRON	MODIFIER	HNRNPLL	normal_artifact;slippage	STR	58,6	59,10	0.095	0.134
chr2	38973932	CTA	C,CTATA	DOWNSTREAM	MODIFIER	ARHGEF33	normal_artifact;slippage	STR	40,5,2	29,6,2	0.110,0.057	0.170,0.074
chr2	39023236	GA	G	DOWNSTREAM	MODIFIER	SOS1	normal_artifact	STR	64,7	76,9	0.093	0.11
chr2	39288315	A	G	UPSTREAM	MODIFIER	SNORA67	normal_artifact	.	36,2	27,5	0.075	0.176
chr2	39351950	C	T	DOWNSTREAM	MODIFIER	MAP4K3	PASS	.	8,0	3,4	0.1	0.554
chr2	39581331	G	A	INTRON	MODIFIER	AC007246.3	weak_evidence	.	10,0	3,2	0.083	0.428
chr2	40018464	T	C	INTRON	MODIFIER	SLC8A1-AS1	fragment;weak_evidence	.	8,0	0,1	0.1	0.667
chr2	41872186	C	T	UPSTREAM	MODIFIER	AC104654.1	weak_evidence	.	9,0	3,2	0.091	0.427
chr2	41953909	GCGCACACACA	G,GCACA	UPSTREAM	MODIFIER	C2orf91	germline;multiallelic;normal_artifact	.	8,0,8	9,2,5	0.048,0.523	0.133,0.329
chr2	42055297	T	TG	DOWNSTREAM	MODIFIER	PKDCC	weak_evidence	STR	151,0	183,10	0.006421	0.037
chr2	42265098	CT	C	DOWNSTREAM	MODIFIER	EML4	slippage;weak_evidence	STR	42,0	32,3	0.021	0.108
chr2	42544255	G	A	INTRON	MODIFIER	MTA3	weak_evidence	.	8,0	1,2	0.1	0.599
chr2	43194013	C	A	INTERGENIC	MODIFIER		weak_evidence	.	9,0	2,2	0.091	0.5
chr2	43224600	CCTG	C	CODON_DELETION	MODERATE	ZFP36L2	normal_artifact;slippage;weak_evidence	STR	81,4	80,4	0.056	0.057
chr2	43700644	GT	G	DOWNSTREAM	MODIFIER	PLEKHH2	normal_artifact	STR	74,7	84,7	0.087	0.077
chr2	43738465	A	G	NON_SYNONYMOUS_CODING	MODERATE	PLEKHH2	normal_artifact	.	76,8	63,8	0.096	0.121
chr2	43792700	G	A	SYNONYMOUS_CODING	LOW	DYNC2LI1	normal_artifact	.	98,2	95,12	0.029	0.118
chr2	43831752	C	CG	INTRON	MODIFIER	ABCG5	normal_artifact	STR	49,1	69,8	0.038	0.097
chr2	43948223	G	GA	DOWNSTREAM	MODIFIER	LRPPRC	normal_artifact	STR	98,3	151,16	0.023	0.086
chr2	44024255	G	T	INTERGENIC	MODIFIER		clustered_events;haplotype	.	23,0	17,3	0.04	0.182
chr2	44024268	T	A	INTERGENIC	MODIFIER		clustered_events;haplotype	.	28,0	20,4	0.033	0.192
chr2	44024280	C	T	INTERGENIC	MODIFIER		clustered_events;haplotype	.	31,0	27,4	0.03	0.152
chr2	44024285	A	T	INTERGENIC	MODIFIER		clustered_events;haplotype	.	31,0	26,4	0.03	0.156
chr2	44024330	T	C	INTERGENIC	MODIFIER		clustered_events;haplotype	.	43,0	41,6	0.022	0.143
chr2	44024332	A	G	INTERGENIC	MODIFIER		clustered_events;haplotype	.	43,0	41,6	0.022	0.143
chr2	44201252	C	T	NON_SYNONYMOUS_CODING	MODERATE	PPM1B	normal_artifact	.	114,7	101,12	0.064	0.112
chr2	44255905	G	C	INTERGENIC	MODIFIER		germline;weak_evidence	.	9,0	0,1	0.091	0.667
chr2	44346528	G	T	INTRON	MODIFIER	PREPL	PASS	.	11,0	17,3	0.077	0.182
chr2	44942290	AGGC	A	UPSTREAM	MODIFIER	SIX3-AS1	normal_artifact;slippage;weak_evidence	STR	106,1	100,4	0.018	0.046
chr2	45488509	T	C	INTRON	MODIFIER	SRBD1	germline	.	8,0	5,10	0.1	0.645
chr2	45984754	TA	T	DOWNSTREAM	MODIFIER	PRKCE	normal_artifact	STR	67,5	77,7	0.068	0.093
chr2	46001252	CAT	C,CATAT,CATATAT,CATATATAT	DOWNSTREAM	MODIFIER	AC017078.1	multiallelic;slippage	STR	1,0,12,3,5	5,6,3,4,4	0.037,0.508,0.145,0.233	0.242,0.135,0.208,0.207
chr2	46356133	ACC	A	INTRON	MODIFIER	EPAS1	weak_evidence	STR	19,0	12,4	0.043	0.271
chr2	46581112	T	G	UTR_3_PRIME	MODIFIER	RHOQ	PASS	.	16,0	14,2	0.054	0.168
chr2	47024301	C	T	NON_SYNONYMOUS_CODING	MODERATE	TTC7A	normal_artifact	.	185,12	196,24	0.064	0.111
chr2	47512509	C	CA	DOWNSTREAM	MODIFIER	KCNK12	normal_artifact	STR	49,4	53,12	0.077	0.174
chr2	47521625	G	A	NON_SYNONYMOUS_CODING	MODERATE	KCNK12	normal_artifact	.	211,16	169,33	0.073	0.164
chr2	47521669	G	A	SYNONYMOUS_CODING	LOW	KCNK12	normal_artifact	.	234,15	202,25	0.062	0.113
chr2	47570250	GGCA	G	CODON_DELETION	MODERATE	KCNK12	normal_artifact;slippage;strand_bias;weak_evidence	STR	97,2	118,3	0.029	0.032
chr2	47795854	G	A	DOWNSTREAM	MODIFIER	RPL36AP15	PASS	.	40,0	32,9	0.023	0.231
chr2	48461933	GA	G	UPSTREAM	MODIFIER	PPP1R21	normal_artifact;slippage	STR	26,2	11,4	0.1	0.294
chr2	48989174	T	C	INTRON	MODIFIER	FSHR	PASS	.	19,0	14,6	0.046	0.318
chr2	49973869	T	C	UTR_5_PRIME	MODIFIER	NRXN1	PASS	.	52,0	34,4	0.019	0.125
chr2	50538544	GC	G	FRAME_SHIFT	HIGH	NRXN1	normal_artifact	STR	199,2	187,18	0.014	0.077
chr2	51028205	G	A	SYNONYMOUS_CODING	LOW	NRXN1	normal_artifact	.	159,7	163,18	0.042	0.1
chr2	53814903	C	T	SYNONYMOUS_CODING	LOW	ERLEC1	normal_artifact	.	96,2	85,17	0.03	0.173
chr2	53898048	G	GA	INTRON	MODIFIER	PSME4	normal_artifact;slippage;weak_evidence	STR	43,2	31,3	0.026	0.111
chr2	53936717	G	GA	UPSTREAM	MODIFIER	PSME4	normal_artifact;slippage;weak_evidence	STR	56,4	55,5	0.062	0.1
chr2	54082473	TG	T	UPSTREAM	MODIFIER	RP11-477N3.1	weak_evidence	STR	12,0	0,1	0.072	0.667
chr2	54138848	A	G	INTRON	MODIFIER	ACYP2	normal_artifact	.	21,1	19,6	0.082	0.261
chr2	54526457	G	T	NON_SYNONYMOUS_CODING	MODERATE	SPTBN1	normal_artifact	.	143,7	185,11	0.052	0.056
chr2	54645198	C	T	INTRON	MODIFIER	SPTBN1	normal_artifact	.	93,8	73,21	0.086	0.229
chr2	54699242	C	T	INTERGENIC	MODIFIER		weak_evidence	.	9,0	2,2	0.091	0.499
chr2	55462550	G	T	INTERGENIC	MODIFIER		weak_evidence	.	13,0	7,2	0.067	0.273
chr2	55581792	T	C	INTRON	MODIFIER	PPP4R3B	normal_artifact;weak_evidence	.	48,1	44,3	0.039	0.068
chr2	55597327	A	G	DOWNSTREAM	MODIFIER	PPP4R3B	weak_evidence	.	9,0	3,2	0.091	0.426
chr2	56184842	T	C	NON_SYNONYMOUS_CODING	MODERATE	CCDC85A	normal_artifact	.	68,4	69,7	0.068	0.099
chr2	56372645	C	T	INTRON	MODIFIER	CCDC85A	normal_artifact	.	35,1	23,4	0.053	0.172
chr2	57582371	A	G	INTERGENIC	MODIFIER		weak_evidence	.	10,0	6,2	0.084	0.304
chr2	58135015	CA	C,CAA	INTRON	MODIFIER	VRK2	germline;normal_artifact;slippage	STR	23,10,2	11,12,3	0.289,0.064	0.442,0.137
chr2	58194239	G	A	INTRON	MODIFIER	FANCL	normal_artifact	.	132,8	112,16	0.053	0.126
chr2	59019560	C	CAT	INTRON	MODIFIER	LINC01122	normal_artifact;slippage;weak_evidence	STR	37,2	29,2	0.072	0.091
chr2	60761727	AT	A	INTRON	MODIFIER	PAPOLG	normal_artifact;slippage;weak_evidence	STR	45,2	41,5	0.062	0.11
chr2	60779639	C	T	PROTEIN_STRUCTURAL_INTERACTION_LOCUS	HIGH	PAPOLG	normal_artifact	.	62,3	69,8	0.058	0.113
chr2	60916859	T	A	INTRON	MODIFIER	REL	normal_artifact	.	43,5	51,12	0.098	0.184
chr2	61059526	G	T	INTERGENIC	MODIFIER		weak_evidence	.	9,0	2,2	0.092	0.499
chr2	61106939	A	C	INTRON	MODIFIER	KIAA1841	weak_evidence	.	8,0	3,1	0.1	0.333
chr2	61214188	G	A	NON_SYNONYMOUS_CODING	MODERATE	USP34	normal_artifact	.	168,11	152,18	0.066	0.109
chr2	61229470	A	C	INTRON	MODIFIER	USP34	PASS	.	17,0	9,5	0.047	0.356
chr2	61259554	ATTT	A,ATT,ATTTT	UPSTREAM	MODIFIER	USP34	germline;multiallelic;normal_artifact	STR	8,6,5,0	8,8,5,3	0.303,0.262,0.044	0.322,0.219,0.146
chr2	61325453	T	C	NON_SYNONYMOUS_CODING	MODERATE	USP34	weak_evidence	.	45,0	57,3	0.021	0.064
chr2	61347887	ATGG	A	CODON_CHANGE_PLUS_CODON_DELETION	MODERATE	USP34	slippage;weak_evidence	STR	103,0	83,5	0.009145	0.065
chr2	61421797	A	G	UPSTREAM	MODIFIER	AC016894.1	weak_evidence	.	19,0	15,3	0.046	0.192
chr2	61495765	A	G	UPSTREAM	MODIFIER	XPO1	weak_evidence	.	14,1	14,2	0.078	0.166
chr2	61872542	C	T	NON_SYNONYMOUS_CODING	MODERATE	CCT4	normal_artifact	.	87,7	105,8	0.076	0.077
chr2	61875078	G	A	INTRON	MODIFIER	CCT4	weak_evidence	.	8,0	2,2	0.1	0.499
chr2	61969135	GT	G	INTRON	MODIFIER	COMMD1	slippage;weak_evidence	STR	9,0	13,3	0.086	0.227
chr2	61997208	T	C	INTRON	MODIFIER	COMMD1	PASS	.	9,0	4,2	0.091	0.375
chr2	62864763	A	T	NON_SYNONYMOUS_CODING	MODERATE	EHBP1	normal_artifact	.	85,5	65,6	0.061	0.094
chr2	62948598	C	T	SYNONYMOUS_CODING	LOW	EHBP1	normal_artifact	.	116,9	106,27	0.073	0.206
chr2	62993857	CT	C	INTRON	MODIFIER	EHBP1	slippage	STR	23,0	24,4	0.038	0.17
chr2	63251785	C	T	INTRON	MODIFIER	WDPCP	germline;weak_evidence	.	9,0	0,2	0.091	0.75
chr2	63492640	A	G	INTRON	MODIFIER	WDPCP	weak_evidence	.	9,0	2,1	0.091	0.396
chr2	63531040	A	G	INTRON	MODIFIER	WDPCP	normal_artifact;weak_evidence	.	30,1	28,2	0.061	0.094
chr2	64465853	C	T	DOWNSTREAM	MODIFIER	LGALSL	germline;weak_evidence	.	10,0	2,2	0.083	0.5
chr2	65136323	C	A	INTERGENIC	MODIFIER		weak_evidence	.	8,0	2,2	0.1	0.499
chr2	66567399	AC	A	INTRON	MODIFIER	MEIS1	normal_artifact;weak_evidence	STR	160,7	137,10	0.035	0.052
chr2	66881271	TA	CT	UPSTREAM	MODIFIER	AC009474.2	PASS	.	13,0	15,6	0.067	0.304
chr2	67877753	ACAG	A	INTERGENIC	MODIFIER		normal_artifact;slippage	STR	58,4	43,10	0.064	0.199
chr2	68131082	AT	A	UTR_3_PRIME	MODIFIER	WDR92	slippage;weak_evidence	STR	13,0	6,2	0.067	0.297
chr2	68162425	TTA	T	UPSTREAM	MODIFIER	WDR92	normal_artifact;slippage	STR	90,3	90,9	0.041	0.094
chr2	68186654	TA	T	INTRON	MODIFIER	PPP3R1	normal_artifact;slippage	STR	115,2	95,19	0.025	0.159
chr2	68464357	C	A	NON_SYNONYMOUS_CODING	MODERATE	FBXO48	normal_artifact	.	129,13	101,11	0.092	0.094
chr2	68529164	AG	A	UPSTREAM	MODIFIER	APLF	normal_artifact	STR	254,22	231,41	0.061	0.134
chr2	68816132	CTT	C,CT	UPSTREAM	MODIFIER	ARHGAP25	germline;normal_artifact	STR	40,0,43	28,5,32	0.012,0.529	0.079,0.505
chr2	68816135	T	A	UPSTREAM	MODIFIER	ARHGAP25	weak_evidence	.	84,0	60,5	0.012	0.075
chr2	69152006	A	G	INTRON	MODIFIER	ANTXR1	PASS	.	23,0	23,6	0.04	0.225
chr2	69193442	GTC	G	INTRON	MODIFIER	ANTXR1	normal_artifact;slippage;weak_evidence	STR	51,5	54,6	0.098	0.104
chr2	69328282	C	T	NON_SYNONYMOUS_CODING	MODERATE	GFPT1	normal_artifact	.	96,6	76,19	0.066	0.205
chr2	69465482	T	C	DOWNSTREAM	MODIFIER	AAK1	normal_artifact	.	81,4	106,21	0.056	0.167
chr2	69513685	G	T	UPSTREAM	MODIFIER	AAK1	weak_evidence	.	9,0	2,2	0.091	0.499
chr2	69542590	C	CA	FRAME_SHIFT	HIGH	AAK1	PASS	STR	71,4	99,14	0.03	0.118
chr2	70456300	T	C	DOWNSTREAM	MODIFIER	TGFA	normal_artifact	.	69,6	81,18	0.09	0.188
chr2	70683670	C	A	NON_SYNONYMOUS_CODING	MODERATE	ADD2	normal_artifact	.	369,36	348,31	0.089	0.083
chr2	70706509	G	A	INTRON	MODIFIER	ADD2	normal_artifact	.	84,7	98,10	0.086	0.1
chr2	70922983	G	A	INTRON	MODIFIER	VAX2	weak_evidence	.	8,0	1,2	0.1	0.599
chr2	71055447	C	G	UPSTREAM	MODIFIER	OR7E62P	normal_artifact	.	151,3	124,15	0.026	0.11
chr2	71074668	A	G	UPSTREAM	MODIFIER	NAGK	weak_evidence	.	13,0	2,2	0.065	0.502
chr2	71188506	C	A	NON_SYNONYMOUS_CODING	MODERATE	PAIP2B	normal_artifact	.	87,7	110,9	0.076	0.082
chr2	71423418	GA	G	UPSTREAM	MODIFIER	ZNF638	normal_artifact;slippage	STR	65,5	63,8	0.07	0.109
chr2	71570745	A	T	INTRON	MODIFIER	DYSF	normal_artifact	.	237,25	208,33	0.097	0.138
chr2	73088154	AC	A	FRAME_SHIFT	HIGH	RAB11FIP5	normal_artifact	STR	341,38	402,28	0.088	0.053
chr2	73248025	GC	G	DOWNSTREAM	MODIFIER	CCT7	normal_artifact	STR	93,9	117,14	0.084	0.099
chr2	73448697	AT	A	UPSTREAM	MODIFIER	ALMS1	normal_artifact	STR	259,21	233,25	0.059	0.093
chr2	73602167	CT	C	UPSTREAM	MODIFIER	ALMS1	normal_artifact;slippage;weak_evidence	STR	59,1	80,5	0.033	0.062
chr2	73849495	G	GA	UPSTREAM	MODIFIER	STAMBP	normal_artifact;slippage;weak_evidence	STR	114,6	119,5	0.032	0.048
chr2	73950509	TTC	T	DOWNSTREAM	MODIFIER	DGUOK	normal_artifact;slippage;weak_evidence	STR	77,2	77,5	0.029	0.068
chr2	74208865	G	GT	DOWNSTREAM	MODIFIER	MTHFD2	normal_artifact;slippage;strand_bias	STR	68,5	71,6	0.051	0.09
chr2	74421818	T	C	SPLICE_SITE_DONOR	HIGH	WDR54	normal_artifact	.	92,6	122,6	0.07	0.053
chr2	74460282	AC	A,ACCC	DOWNSTREAM	MODIFIER	INO80B	germline;multiallelic;normal_artifact	STR	53,195,22	53,212,32	0.714,0.087	0.724,0.109
chr2	74502990	AG	A	UTR_5_PRIME	MODIFIER	LBX2	normal_artifact	STR	189,12	183,34	0.06	0.158
chr2	74528984	G	GA,GAA	UPSTREAM	MODIFIER	HTRA2	germline;normal_artifact	STR	87,88,5	92,68,5	0.491,0.029	0.406,0.035
chr2	74536448	G	A	SYNONYMOUS_CODING	LOW	LOXL3	normal_artifact	.	146,11	113,11	0.075	0.094
chr2	74628754	G	A	INTRON	MODIFIER	M1AP	normal_artifact	.	89,6	84,8	0.07	0.094
chr2	75645923	G	A	UPSTREAM	MODIFIER	MRPL19	weak_evidence	.	9,0	2,1	0.088	0.401
chr2	79687541	A	G	INTRON	MODIFIER	CTNNA2	normal_artifact	.	74,6	58,8	0.084	0.131
chr2	80162580	C	T	INTRON	MODIFIER	CTNNA2	normal_artifact	.	63,4	61,11	0.071	0.162
chr2	80581680	G	T	DOWNSTREAM	MODIFIER	AC008067.2	normal_artifact	.	168,13	154,18	0.073	0.105
chr2	81200913	AT	A	EXON	MODIFIER	AC105342.1	normal_artifact;slippage	STR	49,6	43,17	0.092	0.266
chr2	81459690	GTA	G	DOWNSTREAM	MODIFIER	AC012075.2	clustered_events;weak_evidence	.	8,0	4,2	0.1	0.377
chr2	81459696	C	G	DOWNSTREAM	MODIFIER	AC012075.2	clustered_events;germline	.	8,0	3,3	0.1	0.489
chr2	81459700	G	A	DOWNSTREAM	MODIFIER	AC012075.2	clustered_events;germline	.	8,0	2,3	0.1	0.574
chr2	81921889	A	G	INTERGENIC	MODIFIER		weak_evidence	.	8,0	2,1	0.1	0.4
chr2	82446663	C	T	INTERGENIC	MODIFIER		normal_artifact	.	27,1	23,5	0.067	0.201
chr2	84423732	A	AT	UTR_3_PRIME	MODIFIER	SUCLG1	slippage;weak_evidence	STR	66,3	88,4	0.026	0.054
chr2	84443404	A	C	UPSTREAM	MODIFIER	SUCLG1	PASS	.	113,0	93,9	0.008613	0.095
chr2	85197310	C	T	INTRON	MODIFIER	TCF7L1	weak_evidence	.	9,0	0,1	0.088	0.667
chr2	85341468	A	G	DOWNSTREAM	MODIFIER	RETSAT	normal_artifact	.	33,1	31,3	0.055	0.111
chr2	85560284	T	C	UPSTREAM	MODIFIER	VAMP8	weak_evidence	.	9,0	2,1	0.091	0.4
chr2	86045298	G	A	SYNONYMOUS_CODING	LOW	POLR1A	normal_artifact	.	124,14	126,14	0.099	0.104
chr2	86206341	G	GT	INTRON	MODIFIER	MRPL35	normal_artifact;slippage	STR	80,3	60,8	0.036	0.12
chr2	86337702	CC	GG	UPSTREAM	MODIFIER	REEP1	PASS	.	8,0	4,2	0.1	0.371
chr2	86337705	A	G	UPSTREAM	MODIFIER	REEP1	PASS	.	8,0	4,2	0.1	0.375
chr2	86785841	GA	G	UTR_3_PRIME	MODIFIER	CD8A	normal_artifact	STR	111,6	91,15	0.051	0.122
chr2	86930067	G	C	DOWNSTREAM	MODIFIER	AC111200.7	map_qual;normal_artifact;strand_bias	.	338,3	381,8	0.01	0.022
chr2	86930230	T	C	DOWNSTREAM	MODIFIER	AC111200.7	normal_artifact	.	82,7	73,13	0.081	0.16
chr2	86984751	T	C	INTRON	MODIFIER	RGPD1	weak_evidence	.	16,0	31,4	0.056	0.132
chr2	87187207	T	C	EXON	MODIFIER	AC083899.3	map_qual;normal_artifact;strand_bias	.	161,16	142,13	0.093	0.089
chr2	87418945	C	T	INTERGENIC	MODIFIER		PASS	.	8,0	3,3	0.1	0.499
chr2	87825696	G	C	NON_SYNONYMOUS_CODING	MODERATE	RGPD2	haplotype;normal_artifact;strand_bias	.	68,4	72,6	0.067	0.087
chr2	87825715	T	C	SYNONYMOUS_CODING	LOW	RGPD2	haplotype;normal_artifact;strand_bias	.	69,3	67,5	0.054	0.081
chr2	87973343	G	C	DOWNSTREAM	MODIFIER	NDUFB4P7	map_qual;normal_artifact;strand_bias	.	94,8	88,6	0.086	0.072
chr2	88185286	TC	T	DOWNSTREAM	MODIFIER	THNSL2	normal_artifact;slippage	STR	132,17	123,14	0.099	0.091
chr2	88562260	CT	C	INTRON	MODIFIER	EIF2AK3	normal_artifact;slippage;weak_evidence	STR	63,6	79,8	0.086	0.085
chr2	88593147	AAT	A	INTRON	MODIFIER	EIF2AK3	normal_artifact;slippage;weak_evidence	STR	31,1	34,2	0.059	0.079
chr2	88966221	G	A	INTERGENIC	MODIFIER		normal_artifact	.	222,12	244,19	0.052	0.075
chr2	89117499	G	A	NON_SYNONYMOUS_CODING	MODERATE	IGKV1-17	haplotype;normal_artifact;strand_bias	.	245,9	237,13	0.038	0.053
chr2	89117520	T	A	NON_SYNONYMOUS_CODING	MODERATE	IGKV1-17	haplotype;map_qual;strand_bias;weak_evidence	.	238,1	237,4	0.007834	0.02
chr2	89128884	T	C	EXON	MODIFIER	IGKV2-18	normal_artifact	.	358,18	317,36	0.05	0.103
chr2	89610894	T	C	INTERGENIC	MODIFIER		normal_artifact	.	261,24	240,11	0.086	0.047
chr2	90039306	C	T	STOP_GAINED	HIGH	IGKV3D-20	normal_artifact;strand_bias	.	71,6	52,7	0.088	0.13
chr2	91443348	G	A	INTERGENIC	MODIFIER		map_qual;weak_evidence	.	10,0	6,2	0.083	0.3
chr2	91443469	A	G	INTERGENIC	MODIFIER		clustered_events;haplotype;normal_artifact;weak_evidence	.	101,6	85,3	0.063	0.044
chr2	91443476	C	T	INTERGENIC	MODIFIER		clustered_events;haplotype;normal_artifact	.	108,7	86,4	0.065	0.053
chr2	91443488	G	A	INTERGENIC	MODIFIER		clustered_events;haplotype;normal_artifact	.	131,9	102,5	0.064	0.053
chr2	91443497	A	G	INTERGENIC	MODIFIER		clustered_events;haplotype;normal_artifact	.	147,9	109,5	0.057	0.05
chr2	91443601	C	A	INTERGENIC	MODIFIER		clustered_events;haplotype;normal_artifact	.	172,7	126,5	0.044	0.045
chr2	91443607	C	A	INTERGENIC	MODIFIER		clustered_events;haplotype;normal_artifact	.	170,6	125,5	0.039	0.045
chr2	91443617	G	C	INTERGENIC	MODIFIER		clustered_events;haplotype;normal_artifact;strand_bias;weak_evidence	.	157,5	112,2	0.037	0.026
chr2	91586774	C	G	UPSTREAM	MODIFIER	AC116050.1	clustered_events;haplotype	.	13,0	6,5	0.067	0.462
chr2	91586776	C	T	UPSTREAM	MODIFIER	AC116050.1	clustered_events;haplotype	.	13,0	6,5	0.067	0.462
chr2	91586780	A	G	UPSTREAM	MODIFIER	AC116050.1	clustered_events;haplotype	.	12,0	6,3	0.071	0.364
chr2	91589105	G	C	UPSTREAM	MODIFIER	AC116050.1	weak_evidence	.	8,0	9,2	0.1	0.231
chr2	91589139	G	C	UPSTREAM	MODIFIER	AC116050.1	weak_evidence	.	8,0	8,2	0.097	0.256
chr2	91710737	A	G	INTRON	MODIFIER	AC027612.3	PASS	.	8,0	15,4	0.1	0.238
chr2	91749636	A	G	UPSTREAM	MODIFIER	AC027612.1	map_qual;normal_artifact	.	77,2	73,7	0.036	0.096
chr2	91755977	T	C	EXON	MODIFIER	AC027612.4	map_qual;normal_artifact	.	260,6	224,10	0.025	0.045
chr2	91756103	T	C	EXON	MODIFIER	AC027612.4	clustered_events;map_qual;normal_artifact	.	203,9	200,15	0.045	0.069
chr2	91756125	C	T	EXON	MODIFIER	AC027612.4	clustered_events;haplotype;map_qual;normal_artifact	.	185,8	194,12	0.045	0.062
chr2	91756135	G	A	EXON	MODIFIER	AC027612.4	clustered_events;haplotype;map_qual;normal_artifact	.	175,4	188,9	0.028	0.05
chr2	91859019	C	A	UPSTREAM	MODIFIER	AC127391.3	weak_evidence	.	8,0	3,2	0.101	0.427
chr2	91879479	C	T	DOWNSTREAM	MODIFIER	SLC9B1P2	germline;map_qual;normal_artifact	.	19,2	23,17	0.106	0.428
chr2	91887557	C	T	DOWNSTREAM	MODIFIER	SLC9B1P2	clustered_events;haplotype;normal_artifact	.	94,1	125,7	0.021	0.06
chr2	91887570	C	T	DOWNSTREAM	MODIFIER	SLC9B1P2	clustered_events;haplotype;normal_artifact	.	92,1	126,7	0.021	0.059
chr2	91887584	G	T	DOWNSTREAM	MODIFIER	SLC9B1P2	clustered_events;normal_artifact	.	83,5	122,7	0.067	0.061
chr2	91887603	C	A	DOWNSTREAM	MODIFIER	SLC9B1P2	clustered_events;map_qual;normal_artifact	.	80,3	111,6	0.047	0.059
chr2	91887655	G	C	DOWNSTREAM	MODIFIER	SLC9B1P2	clustered_events	.	43,0	62,5	0.022	0.086
chr2	91934667	A	G	UPSTREAM	MODIFIER	SLC9B1P2	germline	.	8,0	5,5	0.1	0.5
chr2	91941255	G	A	EXON	MODIFIER	ACTR3BP2	map_qual;normal_artifact	.	85,7	85,4	0.084	0.054
chr2	91941325	G	A	EXON	MODIFIER	ACTR3BP2	map_qual;normal_artifact;weak_evidence	.	136,5	125,6	0.038	0.051
chr2	94199131	G	A	INTERGENIC	MODIFIER		normal_artifact;weak_evidence	.	44,1	39,2	0.041	0.069
chr2	94199259	A	G	INTERGENIC	MODIFIER		map_qual;normal_artifact	.	215,15	267,20	0.067	0.068
chr2	94246871	AC	A	INTERGENIC	MODIFIER		PASS	STR	9,0	3,5	0.092	0.595
chr2	94818711	CA	C	UPSTREAM	MODIFIER	ANKRD20A8P	normal_artifact	STR	48,5	31,11	0.078	0.252
chr2	94871900	T	G	SYNONYMOUS_CODING	LOW	TEKT4	base_qual;strand_bias	.	227,1	203,22	0.004421	0.061
chr2	94953490	G	A	EXON	MODIFIER	AC103563.2	normal_artifact	.	124,9	131,18	0.073	0.125
chr2	95046229	C	T	DOWNSTREAM	MODIFIER	MAL	weak_evidence	.	8,0	9,3	0.097	0.285
chr2	95106369	A	C	UPSTREAM	MODIFIER	MRPS5	normal_artifact;strand_bias;weak_evidence	.	65,1	67,3	0.029	0.044
chr2	95164803	G	T	UPSTREAM	MODIFIER	ZNF2	PASS	.	8,0	5,2	0.1	0.331
chr2	95282140	A	G	SPLICE_SITE_ACCEPTOR	HIGH	PROM2	normal_artifact	.	254,18	281,34	0.068	0.108
chr2	95287334	T	G	UPSTREAM	MODIFIER	PROM2	base_qual;normal_artifact;strand_bias	.	104,11	119,10	0.086	0.072
chr2	95578109	A	C	INTRON	MODIFIER	TRIM51JP	strand_bias	.	36,0	28,5	0.026	0.149
chr2	95891893	A	G	INTRON	MODIFIER	ANKRD36C	normal_artifact;strand_bias	.	108,4	99,8	0.044	0.083
chr2	95910452	A	G	UPSTREAM	MODIFIER	ANKRD36C	clustered_events;haplotype;map_qual;normal_artifact	.	95,3	90,6	0.04	0.071
chr2	95910458	T	G	UPSTREAM	MODIFIER	ANKRD36C	clustered_events;haplotype;map_qual;normal_artifact	.	96,4	97,7	0.049	0.075
chr2	95910463	C	T	UPSTREAM	MODIFIER	ANKRD36C	clustered_events;haplotype;map_qual;normal_artifact	.	95,4	95,7	0.049	0.076
chr2	95935412	C	T	INTRON	MODIFIER	ANKRD36C	map_qual;normal_artifact;weak_evidence	.	48,4	47,3	0.092	0.076
chr2	95935552	T	TTAATTGAG	INTRON	MODIFIER	ANKRD36C	normal_artifact	.	205,16	195,18	0.072	0.086
chr2	95935653	CA	C	INTRON	MODIFIER	ANKRD36C	normal_artifact	STR	120,8	126,8	0.064	0.057
chr2	95938704	C	A	INTRON	MODIFIER	ANKRD36C	normal_artifact	.	110,8	80,4	0.075	0.058
chr2	95938725	T	A	INTRON	MODIFIER	ANKRD36C	normal_artifact	.	148,11	107,15	0.071	0.128
chr2	95938858	C	A	NON_SYNONYMOUS_CODING	MODERATE	ANKRD36C	normal_artifact	.	381,28	404,22	0.057	0.048
chr2	95938988	G	A	NON_SYNONYMOUS_CODING	MODERATE	ANKRD36C	normal_artifact;weak_evidence	.	116,3	114,4	0.032	0.041
chr2	95939757	G	A	INTRON	MODIFIER	ANKRD36C	germline	.	9,0	8,8	0.091	0.5
chr2	95939820	C	T	INTRON	MODIFIER	ANKRD36C	clustered_events;haplotype	.	20,0	18,4	0.045	0.208
chr2	95939837	G	A	INTRON	MODIFIER	ANKRD36C	clustered_events;haplotype	.	22,0	18,4	0.04	0.208
chr2	95939897	A	C	INTRON	MODIFIER	ANKRD36C	clustered_events;haplotype;normal_artifact;strand_bias	.	47,1	31,4	0.04	0.135
chr2	95939904	CAA	C,CA	INTRON	MODIFIER	ANKRD36C	clustered_events;germline;multiallelic;normal_artifact	STR	28,1,22	17,4,15	0.037,0.423	0.122,0.417
[truncated: 13,648 more rows]

## Sheet: GATK origin results
CHROM	POS	REF	ALT	ANN[0].EFFECT	ANN[0].IMPACT	ANN[0].GENE	ANN[0].GENEID	#CHROM	POS	ID	REF	ALT	QUAL	FILTER	INFO	CONTQ	DP	ECNT	EFF	FS	GERMQ	MBQ	MFRL	MMQ	MPOS	NALOD	NCount	NLOD	OCM	PON	POPAF	ROQ	RPA	RU	SEQQ	STR	STRANDQ	STRQ	TLOD	UNIQ_ALT_READ_COUNT	AD|AWT	AD|BMUT	AF|AWT	AF|BMUT	DP|AWT	DP|BMUT	F1R2|AWT	F1R2|BMUT	F2R1|AWT
chr1	14752	G	A	DOWNSTREAM	MODIFIER	DDX11L1		chr1	14752	.	G	A	.	map_qual;weak_evidence	.	93	103	1	DOWNSTREAM(MODIFIER||343||DDX11L1|processed_transcript|NON_CODING|ENST00000456328|)	GGTGGCGGCA[G/A]AGGAGGGATG	93	20,35	237238	25,24	53	1.74	.	16.2	.	.	2.62	.	.	.	1	.	17	.	4.22	.	54,0	44,4	0.018	0.099	54	48	34,0	24,3	20,0
chr1	15738	A	AT	DOWNSTREAM	MODIFIER	DDX11L1		chr1	15738	.	A	AT	.	map_qual;weak_evidence	.	93	33	1	DOWNSTREAM(MODIFIER||1330||DDX11L1|processed_transcript|NON_CODING|ENST00000456328|)	CAGGGCTGGA[-/T]GGGGAGGAGG	59	20,33	234261	27,29	38	1.28	.	5.38	.	.	6	.	.	.	1	.	28	.	4.66	.	18,0	13,2	0.05	0.177	18	15	13,0	4,0	5,0
chr1	16996	T	C	DOWNSTREAM	MODIFIER	DDX11L1		chr1	16996	.	T	C	.	map_qual;normal_artifact;strand_bias;weak_evidence	.	93	264	1	DOWNSTREAM(MODIFIER||2587||DDX11L1|processed_transcript|NON_CODING|ENST00000456328|)	GCAGGTAGGA[T/C]GGAACATCAA	93	33,36	279279	23,20	45	-5.428	.	23.27	.	.	1.12	.	.	.	1	.	1	.	3.59	.	136,8	112,6	0.059	0.056	144	118	74,4	58,1	62,4
chr1	17519	G	T	UPSTREAM	MODIFIER	MIR6859-1		chr1	17519	.	G	T	.	clustered_events;normal_artifact	.	93	503	4	UPSTREAM(MODIFIER||83||MIR6859-1|miRNA|NON_CODING|ENST00000619216|)	TGGCCTATGT[G/T]CTGTACCTGT	93	37,33	245245	43,43	36	-34.01	.	5.59	.	.	1.82	.	.	.	93	.	48	.	33.8	.	218,21	232,21	0.09	0.083	239	253	116,7	129,9	98,14
chr1	17538	C	A	UPSTREAM	MODIFIER	MIR6859-1		chr1	17538	.	C	A	.	clustered_events;normal_artifact	.	93	464	4	UPSTREAM(MODIFIER||102||MIR6859-1|miRNA|NON_CODING|ENST00000619216|)	GTGTCTGATG[C/A]CCTGGGTCCC	93	37,26	247211	43,39	31	-5.946	.	45.08	.	.	0.536	.	.	.	69	.	34	.	12.04	.	211,7	225,12	0.032	0.05	218	237	110,4	108,11	97,2
chr1	17594	C	T	UPSTREAM	MODIFIER	MIR6859-1		chr1	17594	.	C	T	.	clustered_events;normal_artifact	.	93	353	4	UPSTREAM(MODIFIER||158||MIR6859-1|miRNA|NON_CODING|ENST00000619216|)	CGGCCCTGCC[C/T]TCTGGCCATA	93	35,20	250251	40,40	39	-19.5	.	10.5	.	.	1.36	.	.	.	93	.	93	.	29.64	.	161,15	149,21	0.082	0.121	176	170	84,6	72,8	76,7
chr1	17614	G	A	UPSTREAM	MODIFIER	MIR6859-1		chr1	17614	.	G	A	.	clustered_events;normal_artifact	.	93	324	4	UPSTREAM(MODIFIER||178||MIR6859-1|miRNA|NON_CODING|ENST00000619216|)	ACAGGTTCTC[G/A]GTGGTGTTGA	93	29,20	253230	40,40	28	-16.39	.	9.89	.	.	1.13	.	.	.	93	.	85	.	33	.	138,12	135,19	0.077	0.124	150	154	71,6	59,8	65,4
chr1	19248	C	T	UPSTREAM	MODIFIER	MIR6859-1		chr1	19248	.	C	T	.	map_qual;weak_evidence	.	93	31	1	UPSTREAM(MODIFIER||1812||MIR6859-1|miRNA|NON_CODING|ENST00000619216|)	CCACACTCCA[C/T]GTGCAGAGCA	10	30,33	263263	23,21	51	1.15	.	3.9	.	.	1.44	.	.	.	1	.	8	.	3.75	.	13,0	15,3	0.067	0.199	13	18	7,0	6,2	6,0
chr1	137886	A	T	UPSTREAM	MODIFIER	RP11-34P13.7		chr1	137886	.	A	T	.	normal_artifact	.	93	175	1	UPSTREAM(MODIFIER||4320||RP11-34P13.7|lincRNA|NON_CODING|ENST00000453576|)	TCGGGCCTGG[A/T]GACCCAACCA	93	31,20	232215	40,38	40	-1.826	.	14.53	.	.	6	.	.	.	41	.	49	.	9.29	.	74,3	85,8	0.049	0.093	77	93	40,1	38,3	33,2
chr1	182469	T	A	UTR_5_PRIME	MODIFIER	FO538757.2		chr1	182469	.	T	A	.	map_qual;normal_artifact	.	93	82	1	UTR_5_PRIME(MODIFIER||240||FO538757.2|protein_coding|CODING|ENST00000624431|1)	ACTTCCCGTG[T/A]CCTTTCCACC	93	31,34	311294	25,25	20	-1.58	.	4.82	.	.	6	.	.	.	40	.	9	.	9.19	.	34,2	35,6	0.077	0.162	36	41	20,0	20,3	13,2
chr1	182572	C	T	START_GAINED	LOW	FO538757.2		chr1	182572	.	C	T	.	map_qual;normal_artifact	.	93	340	2	START_GAINED(LOW||||FO538757.2|protein_coding|CODING|ENST00000624431|1)	AGGGTGCAAG[C/T]TGAGCACTGG	93	38,31	253234	25,23	38	-10.84	.	17.37	.	.	6	.	.	.	21	.	5	.	7.23	.	142,10	151,9	0.07	0.056	152	160	77,4	81,2	60,6
chr1	182597	G	A	START_GAINED	LOW	FO538757.2		chr1	182597	.	G	A	.	map_qual;normal_artifact	.	93	477	2	START_GAINED(LOW||||FO538757.2|protein_coding|CODING|ENST00000624431|1)	GAGTTTTCCT[G/A]TGGAGAGGAG	93	35,31	242230	25,23	40	-11.46	.	33.09	.	.	6	.	.	.	52	.	9	.	10.4	.	210,13	231,11	0.057	0.048	223	242	123,5	118,4	86,6
chr1	182785	A	G	DOWNSTREAM	MODIFIER	FO538757.1		chr1	182785	.	A	G	.	map_qual;normal_artifact;strand_bias	.	93	208	1	DOWNSTREAM(MODIFIER||2140||FO538757.1|protein_coding|CODING|ENST00000623083|)	GCTGTGATAC[A/G]TGGCCAGCCC	93	20,35	239202	60,28	3	-6.616	.	11.24	.	.	6	.	.	.	93	.	1	.	19.77	.	87,5	88,11	0.063	0.118	92	99	47,3	48,3	35,2
chr1	183078	G	A	DOWNSTREAM	MODIFIER	FO538757.1		chr1	183078	.	G	A	.	map_qual;normal_artifact	.	93	183	2	DOWNSTREAM(MODIFIER||1847||FO538757.1|protein_coding|CODING|ENST00000623083|)	ATGGTAGAAC[G/A]GAGCAGCTGG	93	30,34	293311	25,25	43	-11.14	.	5.38	.	.	6	.	.	.	83	.	7	.	13.44	.	88,7	73,9	0.082	0.119	95	82	47,5	34,4	40,2
chr1	183129	C	T	SYNONYMOUS_CODING	LOW	FO538757.2		chr1	183129	.	C	T	.	map_qual;normal_artifact	.	93	415	2	SYNONYMOUS_CODING(LOW|SILENT|ccC/ccT|P18|FO538757.2|protein_coding|CODING|ENST00000624431|2)	TGTCTCCCCC[C/T]AGGTGTGTGG	93	36,37	270276	25,25	38	-23.98	.	11.49	.	.	6	.	.	.	93	.	7	.	28.3	.	192,18	181,20	0.086	0.1	210	201	85,12	78,11	106,5
chr1	183598	C	G	DOWNSTREAM	MODIFIER	FO538757.1		chr1	183598	.	C	G	.	clustered_events;normal_artifact;strand_bias	.	93	867	4	DOWNSTREAM(MODIFIER||1327||FO538757.1|protein_coding|CODING|ENST00000623083|)	CCAGCTGGGT[C/G]GACAGACAGG	93	37,38	261277	46,40	31	-67.7	.	6.69	.	.	6	.	.	.	93	.	1	.	39.1	.	382,32	400,19	0.077	0.047	414	419	182,19	202,11	196,12
chr1	183662	G	C	DOWNSTREAM	MODIFIER	FO538757.1		chr1	183662	.	G	C	.	clustered_events;normal_artifact	.	93	1948	4	DOWNSTREAM(MODIFIER||1263||FO538757.1|protein_coding|CODING|ENST00000623083|)	TCTCCTACCT[G/C]AGGCTGAGGA	93	38,38	248245	40,40	36	-144.2	.	29.47	.	.	6	.	.	.	93	.	72	.	151.55	.	886,74	865,74	0.077	0.079	960	939	429,39	439,34	447,35
chr1	183697	G	A	DOWNSTREAM	MODIFIER	FO538757.1		chr1	183697	.	G	A	.	clustered_events;normal_artifact	.	93	2856	4	DOWNSTREAM(MODIFIER||1228||FO538757.1|protein_coding|CODING|ENST00000623083|)	CACTGTTGGG[G/A]AGGCAGCTGT	93	37,33	242243	40,40	30	-153.2	.	102.02	.	.	6	.	.	.	93	.	93	.	148.15	.	1295108	1259104	0.075	0.075	1403	1363	613,60	647,52	665,47
chr1	183733	C	T	DOWNSTREAM	MODIFIER	FO538757.1		chr1	183733	.	C	T	.	clustered_events;normal_artifact	.	93	3409	4	DOWNSTREAM(MODIFIER||1192||FO538757.1|protein_coding|CODING|ENST00000623083|)	CCTCTGTTCC[C/T]ACGAAGGCAG	93	36,36	237238	40,40	44	-186.7	.	129.65	.	.	6	.	.	.	93	.	93	.	203.91	.	1552116	1553127	0.069	0.074	1668	1680	746,65	781,61	782,51
chr1	184057	G	A	NON_SYNONYMOUS_CODING	MODERATE	FO538757.2		chr1	184057	.	G	A	.	normal_artifact;strand_bias	.	93	2099	1	NON_SYNONYMOUS_CODING(MODERATE|MISSENSE|Ggt/Agt|G101S|FO538757.2|protein_coding|CODING|ENST00000624431|3)	CGCTGGAGAC[G/A]GTGTTTGTCA	93	29,37	261284	40,40	18	-31.6	.	214.59	.	.	6	.	.	.	93	.	1	.	40.82	.	959,22	1006,29	0.023	0.027	981	1035	472,11	494,14	455,11
chr1	185262	C	A	SYNONYMOUS_CODING	LOW	FO538757.1		chr1	185262	.	C	A	.	clustered_events;map_qual;normal_artifact	.	93	258	3	SYNONYMOUS_CODING(LOW|SILENT|ccG/ccT|P450|FO538757.1|protein_coding|CODING|ENST00000623083|11)	GTGGCTGCTG[C/A]GGTGGCGGCA	93	36,33	255265	25,25	42	-11.07	.	11.74	.	.	6	.	.	.	85	.	59	.	13.72	.	121,10	108,11	0.081	0.098	131	119	66,3	51,3	54,7
chr1	185313	G	A	SYNONYMOUS_CODING	LOW	FO538757.1		chr1	185313	.	G	A	.	clustered_events;map_qual;normal_artifact	.	93	309	3	SYNONYMOUS_CODING(LOW|SILENT|ccC/ccT|P433|FO538757.1|protein_coding|CODING|ENST00000623083|11)	AGGCTCCTCC[G/A]GGCCCCTCAC	93	20,20	251245	25,25	42	-14.87	.	11.82	.	.	6	.	.	.	89	.	73	.	14.07	.	148,14	128,14	0.089	0.102	162	142	77,8	62,3	68,6
chr1	185336	C	T	NON_SYNONYMOUS_CODING	MODERATE	FO538757.1		chr1	185336	.	C	T	.	clustered_events;map_qual;normal_artifact	.	93	275	3	NON_SYNONYMOUS_CODING(MODERATE|MISSENSE|Gga/Aga|G426R|FO538757.1|protein_coding|CODING|ENST00000623083|11)	GCCCCAGGTC[C/T]TTTCCCAGAG	93	24,20	255243	25,25	46	-10.27	.	13.57	.	.	6	.	.	.	93	.	56	.	16.64	.	128,11	116,14	0.083	0.112	139	130	66,7	47,11	60,4
chr1	187490	C	CA	FRAME_SHIFT	HIGH	FO538757.1		chr1	187490	.	C	CA	.	normal_artifact	.	93	530	1	FRAME_SHIFT(HIGH||att/attT|I255I?|FO538757.1|protein_coding|CODING|ENST00000623083|7)	GGTCGTTGGC[-/A]AATGCCGGAC	93	20,20	228208	44,44	46	-15.69	.	33.29	.	.	6	.	2,3	A	5	STR	93	93	6.62	.	240,18	251,19	0.061	0.054	258	270	121,8	129,14	111,10
chr1	188138	G	A	SYNONYMOUS_CODING	LOW	FO538757.1		chr1	188138	.	G	A	.	map_qual;normal_artifact;weak_evidence	.	93	248	1	SYNONYMOUS_CODING(LOW|SILENT|acC/acT|T178|FO538757.1|protein_coding|CODING|ENST00000623083|5)	ACAGGTTCTC[G/A]GTGGTGTTGA	93	29,28	224222	24,24	47	-13.24	.	3.24	.	.	6	.	.	.	1	.	16	.	3.09	.	103,13	120,5	0.109	0.045	116	125	43,6	52,2	57,5
chr1	188252	G	T	NON_SYNONYMOUS_CODING	MODERATE	FO538757.1		chr1	188252	.	G	T	.	clustered_events;map_qual;normal_artifact	.	93	394	3	NON_SYNONYMOUS_CODING(MODERATE|MISSENSE|gaC/gaA|D140E|FO538757.1|protein_coding|CODING|ENST00000623083|5)	ACACAGGAAA[G/T]TCCTTCAGCT	93	34,20	226199	25,21	30	-7.354	.	35.77	.	.	6	.	.	.	4	.	41	.	5.36	.	192,9	183,10	0.047	0.05	201	193	89,3	79,3	102,6
chr1	188277	C	T	UPSTREAM	MODIFIER	MIR6859-2		chr1	188277	.	C	T	.	clustered_events;map_qual;normal_artifact;weak_evidence	.	93	382	3	UPSTREAM(MODIFIER||319||MIR6859-2|miRNA|NON_CODING|ENST00000612080|)	CTGGGAGGGC[C/T]AGGATGGCCA	93	36,31	226202	25,22	31	-4.952	.	39.37	.	.	6	.	.	.	1	.	9	.	3.05	.	184,6	172,6	0.035	0.037	190	178	90,2	80,3	92,4
chr1	188329	T	C	UPSTREAM	MODIFIER	MIR6859-2		chr1	188329	.	T	C	.	clustered_events;map_qual;normal_artifact;strand_bias	.	93	257	3	UPSTREAM(MODIFIER||371||MIR6859-2|miRNA|NON_CODING|ENST00000612080|)	TCAGCTGCCA[T/C]CCCATCCCAG	93	20,38	232254	25,22	23	-8.687	.	16.02	.	.	6	.	.	.	30	.	1	.	8.11	.	125,9	110,8	0.072	0.074	134	118	64,4	51,4	57,5
chr1	189695	G	A	UPSTREAM	MODIFIER	MIR6859-2		chr1	189695	.	G	A	.	map_qual;normal_artifact;weak_evidence	.	93	54	1	UPSTREAM(MODIFIER||1737||MIR6859-2|miRNA|NON_CODING|ENST00000612080|)	TGTGTAACAC[G/A]ACATCCTCCT	57	37,33	246297	23,20	33	-1.072	.	2.56	.	.	6	.	.	.	1	.	5	.	4.75	.	23,2	24,4	0.108	0.165	25	28	8,0	10,3	14,2
chr1	736890	C	T	INTRON	MODIFIER	RP11-206L10.2		chr1	736890	.	C	T	.	weak_evidence	.	93	26	1	INTRON(MODIFIER||||RP11-206L10.2|processed_transcript|NON_CODING|ENST00000506640|13)	GAGAATCTAA[C/T]GCTGCTGCTC	27	30,33	265226	48,33	43	1.11	.	3.61	.	.	3.83	.	.	.	1	.	9	.	3.9	.	12,0	11,2	0.071	0.199	12	13	7,0	7,2	5,0
chr1	873711	A	G	UPSTREAM	MODIFIER	FAM41C		chr1	873711	.	A	G	.	clustered_events;map_qual;normal_artifact;strand_bias;weak_evidence	.	93	685	3	UPSTREAM(MODIFIER||3510||FAM41C|lincRNA|NON_CODING|ENST00000432963|)	GTCTGCTACC[A/G]TGAGTGGGGT	93	31,29	240277	57,23	48	-5.316	.	69.46	.	.	2.75	.	.	.	1	.	1	.	3.74	.	303,9	347,6	0.028	0.019	312	353	145,4	170,3	143,3
chr1	873743	G	A	UPSTREAM	MODIFIER	FAM41C		chr1	873743	.	G	A	.	clustered_events;haplotype;map_qual;normal_artifact;strand_bias	.	93	641	3	UPSTREAM(MODIFIER||3542||FAM41C|lincRNA|NON_CODING|ENST00000432963|)	TGCGCTTCCC[G/A]GGCCAGCTGA	93	30,33	243250	56,26	33	-36.32	.	25.09	.	.	1.82	.	.	.	93	.	1	.	21.08	.	276,14	330,10	0.051	0.031	290	340	135,6	171,4	134,8
chr1	873755	C	T	UPSTREAM	MODIFIER	FAM41C		chr1	873755	.	C	T	.	clustered_events;haplotype;map_qual;normal_artifact;strand_bias	.	93	620	3	UPSTREAM(MODIFIER||3554||FAM41C|lincRNA|NON_CODING|ENST00000432963|)	GCCAGCTGAA[C/T]GCTGACCTGC	93	29,32	244245	57,24	41	-34.2	.	25.17	.	.	1.92	.	.	.	93	.	1	.	24.56	.	265,13	318,12	0.05	0.038	278	330	126,6	157,6	130,7
chr1	873939	C	T	UPSTREAM	MODIFIER	FAM41C		chr1	873939	.	C	T	.	normal_artifact;strand_bias	.	93	548	2	UPSTREAM(MODIFIER||3738||FAM41C|lincRNA|NON_CODING|ENST00000432963|)	CCGTCACGGC[C/T]GCTACCTAAC	93	29,33	236204	46,36	22	-28.35	.	16.68	.	.	2.75	.	.	.	93	.	1	.	24.11	.	233,19	255,17	0.078	0.062	252	272	138,10	133,8	90,9
chr1	873966	CA	AG	UPSTREAM	MODIFIER	FAM41C		chr1	873966	.	CA	AG	.	normal_artifact;strand_bias	.	93	511	2	UPSTREAM(MODIFIER||3765||FAM41C|lincRNA|NON_CODING|ENST00000432963|)	TGCCATTTTC[CA/AG]GGGTCGCATG	93	36,37	242193	60,38	11	-10.44	.	46.04	.	.	6	.	.	.	88	.	1	.	14.96	.	223,5	261,7	0.026	0.03	228	268	128,4	146,1	90,1
chr1	942724	GC	G	DOWNSTREAM	MODIFIER	NOC2L		chr1	942724	.	GC	G	.	normal_artifact	.	93	187	1	DOWNSTREAM(MODIFIER||1479||NOC2L|protein_coding|CODING|ENST00000327044|)	GCTGGCCCTG[C/-]CCCCCCAGGG	93	38,38	252249	60,60	25	-6.756	.	9.83	.	.	6	.	7,6	C	93	STR	26	93	18.9	.	91,8	63,13	0.077	0.171	99	76	48,3	37,5	41,5
chr1	960704	G	A	NON_SYNONYMOUS_CODING	MODERATE	KLHL17		chr1	960704	.	G	A	.	normal_artifact	.	93	135	1	NON_SYNONYMOUS_CODING(MODERATE|MISSENSE|cGc/cAc|R4H|KLHL17|protein_coding|CODING|ENST00000338591|1)	ATGCAGCCCC[G/A]CAGCGAGCGC	93	29,20	244190	60,60	32	-7.24	.	2.55	.	.	6	.	.	.	41	.	47	.	9.23	.	56,5	60,8	0.094	0.126	61	68	31,4	25,4	25,1
chr1	973370	G	A	DOWNSTREAM	MODIFIER	PERM1		chr1	973370	.	G	A	.	normal_artifact	.	93	227	1	DOWNSTREAM(MODIFIER||1835||PERM1|retained_intron|CODING|ENST00000479361|)	GGTTCCCACC[G/A]TTCCGCACCA	93	30,34	257262	60,60	22	-9.103	.	12.11	.	.	3.33	.	.	.	93	.	30	.	21.86	.	99,5	96,10	0.056	0.101	104	106	61,4	52,7	36,1
chr1	979987	G	A	NON_SYNONYMOUS_CODING	MODERATE	PERM1		chr1	979987	.	G	A	.	normal_artifact	.	93	912	1	NON_SYNONYMOUS_CODING(MODERATE|MISSENSE|cCt/cTt|P234L|PERM1|protein_coding|CODING|ENST00000341290|3)	CTCAGAGGCA[G/A]GTGTAGACAC	93	35,20	244235	60,60	41	-39.17	.	47.63	.	.	6	.	.	.	93	.	93	.	65.3	.	409,28	385,48	0.056	0.103	437	433	210,12	201,16	190,10
chr1	1086138	C	T	UPSTREAM	MODIFIER	C1orf159		chr1	1086138	.	C	T	.	normal_artifact;weak_evidence	.	93	44	1	UPSTREAM(MODIFIER||2066||C1orf159|processed_transcript|CODING|ENST00000464905|)	ACGGGACCGG[C/T]TGTGGGTGCC	57	38,35	307277	60,60	8	-1.339	.	2.8	.	.	6	.	.	.	1	.	8	.	4.24	.	22,1	18,2	0.08	0.136	23	20	12,0	7,1	9,1
chr1	1142929	T	TC	EXON	MODIFIER	LINC01342		chr1	1142929	.	T	TC	.	normal_artifact;slippage	.	93	753	1	EXON(MODIFIER||||LINC01342|lincRNA|NON_CODING|ENST00000416774|3|INFO_REALIGN_3_PRIME)	AATGCCAGGT[-/C]CCCCCCCCAG	93	31,32	238234	60,60	39	-30.66	.	20.14	.	.	2.79	.	8,9	C	93	STR	93	1	66.63	.	296,32	300,65	0.087	0.161	328	365	151,23	141,24	139,9
chr1	1180842	CG	C	UPSTREAM	MODIFIER	TTLL10-AS1		chr1	1180842	.	CG	C	.	normal_artifact;slippage	.	93	361	1	UPSTREAM(MODIFIER||1288||TTLL10-AS1|antisense|NON_CODING|ENST00000379317|)	GCAAGGTGCC[G/-]GGGGGGGTCC	93	29,29	230228	60,60	42	-8.258	.	18.51	.	.	3.43	.	8,7	G	93	STR	45	1	16.9	.	142,13	132,15	0.069	0.097	155	147	77,8	73,6	60,5
chr1	1312209	C	G	UPSTREAM	MODIFIER	ACAP3		chr1	1312209	.	C	G	.	base_qual;normal_artifact	.	93	116	1	UPSTREAM(MODIFIER||4191||ACAP3|protein_coding|CODING|ENST00000354700|)	GGGGGGGGGG[C/G]GGGGCCGGGC	93	38,11	244254	60,60	10	-0.789	.	9.65	.	.	0.78	.	.	.	12	.	16	.	6.35	.	51,4	45,5	0.049	0.094	55	50	30,1	25,2	17,0
chr1	1342120	G	A	SYNONYMOUS_CODING	LOW	DVL1		chr1	1342120	.	G	A	.	PASS	.	93	365	1	SYNONYMOUS_CODING(LOW|SILENT|aaC/aaT|N133|DVL1|protein_coding|CODING|ENST00000378891|4)	TGCCTGTCTC[G/A]TTGTCCATCC	93	30,31	236205	60,60	52	2.25	.	52.49	.	.	4.61	.	.	.	93	.	86	.	25.95	.	175,0	164,17	0.005631	0.094	175	181	84,0	78,8	86,0
chr1	1353771	C	T	UPSTREAM	MODIFIER	DVL1		chr1	1353771	.	C	T	.	normal_artifact	.	93	262	1	UPSTREAM(MODIFIER||4659||DVL1|protein_coding|CODING|ENST00000378891|)	CTGGTGCCTG[C/T]CATCGTTGGT	93	37,31	246235	60,60	42	-5.526	.	22.82	.	.	6	.	.	.	93	.	73	.	28.68	.	121,4	108,17	0.039	0.138	125	125	54,2	52,7	64,2
chr1	1354134	C	T	UPSTREAM	MODIFIER	DVL1		chr1	1354134	.	C	T	.	normal_artifact	.	93	560	1	UPSTREAM(MODIFIER||4999||DVL1|protein_coding|CODING|ENST00000610709|)	GAGGAGGTTA[C/T]AGCTGGGTGG	93	27,31	234244	60,60	35	-14.52	.	39.96	.	.	6	.	.	.	93	.	66	.	23.38	.	237,10	282,17	0.044	0.057	247	299	132,6	137,7	94,4
chr1	1361437	T	TG,TGG	UTR_5_PRIME	MODIFIER	MXRA8		chr1	1361437	.	T	TG,TGG	.	germline;normal_artifact;weak_evidence	.	93	50	1	UTR_5_PRIME(MODIFIER||175||MXRA8|protein_coding|CODING|ENST00000477278|1)	AGACAGGGGT[-/G]CGGGGGGCGC	1	33,21,32	277279285	60,60,60	44,14	-1.487e+01,1.05	.	-1.487e+01,3.51	.	.	6.00,6.00	.	.	.	1	.	38	.	4.71,3.33	.	12,6,0	19,3,2	0.333,0.043	0.147,0.110	18	24	8,3,0	10,2,1	3,1,0
chr1	1387577	C	T	NON_SYNONYMOUS_CODING	MODERATE	CCNL2		chr1	1387577	.	C	T	.	normal_artifact	.	93	473	1	NON_SYNONYMOUS_CODING(MODERATE|MISSENSE|aGt/aAt|S406N|CCNL2|protein_coding|CODING|ENST00000400809|11)	GCCGCTGTCA[C/T]TTTTCCTGGG	93	35,31	231250	60,60	32	-28.27	.	3.91	.	.	6	.	.	.	93	.	89	.	48.86	.	175,16	244,28	0.087	0.103	191	272	91,5	123,15	81,10
chr1	1392835	CA	C	UPSTREAM	MODIFIER	CCNL2		chr1	1392835	.	CA	C	.	normal_artifact	.	93	261	1	UPSTREAM(MODIFIER||4123||CCNL2|retained_intron|CODING|ENST00000463260|)	AAGAAAAGTC[A/-]AAATAGGTTC	93	20,20	231227	60,60	26	-6.05	.	12.22	.	.	6	.	4,3	A	7	STR	93	93	6.41	.	105,11	122,13	0.083	0.082	116	135	55,5	58,7	43,6
chr1	1421007	TG	T	UTR_5_PRIME	MODIFIER	ANKRD65		chr1	1421007	.	TG	T	.	normal_artifact	.	93	463	1	UTR_5_PRIME(MODIFIER||3||ANKRD65|protein_coding|CODING|ENST00000442470|1)	GAGTCCATCT[G/-]GGGGGGAGCA	93	28,33	238243	60,60	43	-0.9032	.	52.33	.	.	6	.	7,6	G	49	STR	85	93	10.6	.	211,3	208,12	0.018	0.052	214	220	95,2	99,6	104,1
chr1	1439598	G	T	SYNONYMOUS_CODING	LOW	VWA1		chr1	1439598	.	G	T	.	PASS	.	93	59	1	SYNONYMOUS_CODING(LOW|SILENT|gcG/gcT|A383|VWA1|protein_coding|CODING|ENST00000476993|3)	AGGTGCCCGC[G/T]GGCCGCAACT	86	20,20	229211	60,60	57	1.32	.	5.69	.	.	6	.	.	.	51	.	58	.	10.41	.	19,0	30,7	0.046	0.195	19	37	11,0	16,2	8,0
chr1	1457000	G	A	INTRON	MODIFIER	ATAD3C		chr1	1457000	.	G	A	.	PASS	.	93	134	1	INTRON(MODIFIER||||ATAD3C|protein_coding|CODING|ENST00000378785|7)	CCAGGACTTA[G/A]GGCTCCGTGG	93	38,31	262248	60,60	40	1.76	.	16.75	.	.	6	.	.	.	44	.	20	.	9.53	.	56,0	70,6	0.017	0.089	56	76	29,0	38,3	25,0
chr1	1459411	T	C	UPSTREAM	MODIFIER	ATAD3C		chr1	1459411	.	T	C	.	normal_artifact;weak_evidence	.	93	110	1	UPSTREAM(MODIFIER||3072||ATAD3C|retained_intron|CODING|ENST00000484537|)	GGGGTGTCAC[T/C]GAGGAACATG	93	23,29	232246	60,60	35	-2.619	.	5.92	.	.	6	.	.	.	1	.	18	.	4.36	.	44,3	56,4	0.068	0.08	47	60	16,0	33,3	27,2
chr1	1462685	G	A	NON_SYNONYMOUS_CODING	MODERATE	ATAD3C		chr1	1462685	.	G	A	.	normal_artifact	.	93	533	1	NON_SYNONYMOUS_CODING(MODERATE|MISSENSE|Gca/Aca|A356T|ATAD3C|protein_coding|CODING|ENST00000378785|11)	CCGGAAGATC[G/A]CACAGCTGGC	93	20,31	227237	60,60	41	-1.9	.	70.66	.	.	4.13	.	.	.	48	.	32	.	10.28	.	269,3	235,9	0.014	0.039	272	244	141,1	121,8	122,2
chr1	1483127	TA	T	UPSTREAM	MODIFIER	ATAD3B		chr1	1483127	.	TA	T	.	normal_artifact;slippage;weak_evidence	.	93	74	1	UPSTREAM(MODIFIER||357||ATAD3B|retained_intron|CODING|ENST00000485748|)	TGTCTCTACT[A/-]AAAAAAAGAA	28	31,31	251270	60,60	41	-0.7769	.	2.64	.	.	3.83	.	8,7	A	1	STR	8	1	5.2	.	24,3	23,4	0.108	0.167	27	27	10,2	12,0	12,1
chr1	1485413	A	G	DOWNSTREAM	MODIFIER	ATAD3B		chr1	1485413	.	A	G	.	normal_artifact	.	93	93	1	DOWNSTREAM(MODIFIER||2751||ATAD3B|processed_transcript|CODING|ENST00000378736|)	GCCTGGGAGC[A/G]CATCGGGGTC	93	31,38	270278	48,48	28	-1.045	.	9.28	.	.	6	.	.	.	73	.	8	.	12.44	.	45,1	40,5	0.042	0.128	46	45	21,0	24,3	20,1
chr1	1517419	G	A	UPSTREAM	MODIFIER	ATAD3A		chr1	1517419	.	G	A	.	normal_artifact	.	93	65	1	UPSTREAM(MODIFIER||202||ATAD3A|retained_intron|CODING|ENST00000429957|)	GGCCGTAAGA[G/A]CGCAAGAGGC	91	38,31	271265	40,40	19	0.099	.	7.21	.	.	6	.	.	.	82	.	11	.	13.59	.	33,1	23,6	0.054	0.226	34	29	15,0	13,2	17,1
chr1	1564739	C	T	SYNONYMOUS_CODING	LOW	SSU72		chr1	1564739	.	C	T	.	normal_artifact	.	93	309	1	SYNONYMOUS_CODING(LOW|SILENT|ccG/ccA|P86|SSU72|protein_coding|CODING|ENST00000359060|2)	GAGGACCACA[C/T]GGGGGGTTTT	93	20,32	230232	60,60	40	-12.1	.	11	.	.	4.61	.	.	.	93	.	91	.	48.02	.	121,10	148,23	0.077	0.139	131	171	61,6	73,15	57,2
chr1	1625471	AG	CC	UPSTREAM	MODIFIER	MIB2		chr1	1625471	.	AG	CC	.	base_qual;clustered_events;normal_artifact;strand_bias;weak_evidence	.	93	222	4	UPSTREAM(MODIFIER||1389||MIB2|retained_intron|CODING|ENST00000505370|)	CTGCCCTCCC[AG/CC]CCCTCCGCCC	93	36,10	231237	60,60	11	0.34	.	10.28	.	.	6	.	.	.	2	.	1	.	4.8	.	102,6	99,15	0.063	0.135	108	114	44,1	47,4	46,0
chr1	1625476	T	C	UPSTREAM	MODIFIER	MIB2		chr1	1625476	.	T	C	.	clustered_events;haplotype;normal_artifact;strand_bias	.	93	226	4	UPSTREAM(MODIFIER||1384||MIB2|retained_intron|CODING|ENST00000505370|)	CTCCCAGCCC[T/C]CCGCCCCCTC	93	33,22	231247	60,60	8	-8.712	.	14.91	.	.	3.57	.	.	.	93	.	1	.	28.2	.	107,5	102,12	0.051	0.105	112	114	47,2	52,4	52,2
chr1	1625479	G	C,GC	UPSTREAM	MODIFIER	MIB2		chr1	1625479	.	G	C,GC	.	clustered_events;germline;multiallelic;normal_artifact	.	93	246	4	UPSTREAM(MODIFIER||1381||MIB2|retained_intron|CODING|ENST00000505370|)	CCAGCCCTCC[G/C]CCCCCTCAGC	1	37,24,37	227251235	60,60,60	8,32	-6.976e+00,-9.049e+01	.	18.87,-9.071e+01	.	.	6.00,6.00	.	.	.	93	.	93	.	24.47,75.35	.	62,4,46	54,10,52	0.039,0.412	0.083,0.447	112	116	30,0,22	29,5,25	32,0,21
chr1	1625485	T	C	UPSTREAM	MODIFIER	MIB2		chr1	1625485	.	T	C	.	clustered_events;haplotype;normal_artifact;strand_bias	.	93	261	4	UPSTREAM(MODIFIER||1375||MIB2|retained_intron|CODING|ENST00000505370|)	CTCCGCCCCC[T/C]CAGCCCCTTC	93	33,20	229231	60,60	5	-0.3109	.	32.82	.	.	3.53	.	.	.	93	.	1	.	18.17	.	123,1	130,7	0.016	0.058	124	137	55,0	62,4	56,1
chr1	1626770	A	C	UPSTREAM	MODIFIER	MIB2		chr1	1626770	.	A	C	.	base_qual;normal_artifact;strand_bias	.	93	467	1	UPSTREAM(MODIFIER||90||MIB2|retained_intron|CODING|ENST00000505370|)	TCCCCCTGCC[A/C]CCCCCGCCGC	93	20,10	237254	60,60	40	-3.113	.	38.58	.	.	2.36	.	.	.	29	.	1	.	7.98	.	185,11	239,14	0.027	0.035	196	253	67,1	92,0	83,0
chr1	1634380	T	G	DOWNSTREAM	MODIFIER	MIB2		chr1	1634380	.	T	G	.	weak_evidence	.	93	71	1	DOWNSTREAM(MODIFIER||3775||MIB2|protein_coding|CODING|ENST00000505820|)	CGGGCGGCCT[T/G]GGGGCAGGGG	93	33,26	244242	57,36	32	1.3	.	11.12	.	.	6	.	.	.	1	.	31	.	4.11	.	38,0	28,4	0.025	0.136	38	32	13,0	11,1	18,0
chr1	1645363	G	GT	INTRON	MODIFIER	CDK11B		chr1	1645363	.	G	GT	.	normal_artifact;slippage	.	93	2221	1	INTRON(MODIFIER||||CDK11B|protein_coding|CODING|ENST00000407249|5)	ATCCGTGAAG[-/T]TTTTTTTTTC	93	20,20	219221	48,47	34	-29.59	.	129.75	.	.	4.61	.	9,10	T	93	STR	93	1	16.94	.	831,76	955,66	0.051	0.032	907	1021	397,31	484,42	405,41
chr1	1647642	C	T	INTRON	MODIFIER	CDK11B		chr1	1647642	.	C	T	.	normal_artifact;strand_bias	.	93	542	2	INTRON(MODIFIER||||CDK11B|protein_coding|CODING|ENST00000407249|5)	TCTGCCAGGT[C/T]CTTTCACGCA	93	20,33	231303	60,40	23	-30.98	.	21.29	.	.	6	.	.	.	93	.	1	.	33.48	.	251,16	245,18	0.063	0.069	267	263	135,10	123,12	112,6
chr1	1647727	A	G	INTRON	MODIFIER	CDK11B		chr1	1647727	.	A	G	.	normal_artifact;weak_evidence	.	93	371	2	INTRON(MODIFIER||||CDK11B|protein_coding|CODING|ENST00000407249|5)	GTCTTTGGCG[A/G]GATCACAGCT	93	34,37	233396	60,40	32	0.384	.	53.2	.	.	6	.	.	.	1	.	11	.	3.84	.	190,1	169,4	0.01	0.027	191	173	95,0	85,2	95,1
chr1	1668612	C	G	UPSTREAM	MODIFIER	RP11-345P4.6		chr1	1668612	.	C	G	.	normal_artifact;weak_evidence	.	93	201	2	UPSTREAM(MODIFIER||3378||RP11-345P4.6|processed_transcript|NON_CODING|ENST00000596308|)	ATGCCTCGAG[C/G]GGACAGCTGG	93	29,36	242265	60,33	57	-6.477	.	16.28	.	.	1.8	.	.	.	1	.	14	.	3.55	.	96,3	91,3	0.039	0.032	99	94	41,1	51,3	52,2
chr1	1668622	G	A	UPSTREAM	MODIFIER	RP11-345P4.6		chr1	1668622	.	G	A	.	normal_artifact;weak_evidence	.	93	176	2	UPSTREAM(MODIFIER||3368||RP11-345P4.6|processed_transcript|NON_CODING|ENST00000596308|)	CGGACAGCTG[G/A]ACTGTGCACT	93	38,33	248265	60,33	48	-6.434	.	14.19	.	.	1.74	.	.	.	1	.	14	.	4.21	.	89,3	81,3	0.043	0.044	92	84	41,1	43,2	44,2
chr1	1707487	G	A	SYNONYMOUS_CODING	LOW	CDK11A		chr1	1707487	.	G	A	.	normal_artifact	.	93	889	1	SYNONYMOUS_CODING(LOW|SILENT|ggC/ggT|G392|CDK11A|protein_coding|CODING|ENST00000378633|11)	GCACATAGTC[G/A]CCCTCTGTCA	93	20,20	232232	48,48	50	-12.21	.	81.56	.	.	6	.	.	.	93	.	39	.	25.95	.	388,13	447,23	0.033	0.049	401	470	214,9	227,10	163,4
chr1	1707623	T	C	UPSTREAM	MODIFIER	CDK11A		chr1	1707623	.	T	C	.	map_qual;normal_artifact;strand_bias	.	93	348	1	UPSTREAM(MODIFIER||3068||CDK11A|retained_intron|CODING|ENST00000468397|)	TAGGAGTAAG[T/C]AAGGATCATG	93	30,39	236304	48,27	25	-20.67	.	7.65	.	.	0.291	.	.	.	25	.	1	.	7.84	.	150,13	166,7	0.084	0.045	163	173	89,6	75,3	61,7
chr1	1734864	T	C	UPSTREAM	MODIFIER	RP1-283E3.4		chr1	1734864	.	T	C	.	map_qual;normal_artifact;strand_bias	.	93	330	1	UPSTREAM(MODIFIER||953||RP1-283E3.4|transcribed_processed_pseudogene|NON_CODING|ENST00000418950|)	GGTACTCTAT[T/C]GGTTTCCATT	93	20,30	238204	46,27	15	-21.3	.	7.44	.	.	2.03	.	.	.	93	.	1	.	18.05	.	158,15	131,13	0.088	0.095	173	144	84,5	57,8	71,9
chr1	1752908	CCCT	C,CCCTCCT	CODON_INSERTION	MODERATE	NADK		chr1	1752908	.	CCCT	C,CCCTCCT	.	germline;multiallelic;normal_artifact;slippage	.	93	732	1	CODON_INSERTION(MODERATE||gag/gAGGag|E590EE|NADK|protein_coding|CODING|ENST00000378625|14)	TTGACCTAGC[CCT/-]CCTCCTCCTC	1	36,20,29	239203227	60,60,60	47,40	-5.377e+00,-4.525e+02	.	59.04,-4.530e+02	.	.	4.13,1.77	.	9,8,10	CCT	93	STR	93	1	9.88,335.78	.	150,5,158	159,10,133	0.018,0.504	0.034,0.438	313	302	65,2,79	87,2,65	80,3,71
chr1	1757384	TAA	T,TA	UPSTREAM	MODIFIER	NADK		chr1	1757384	.	TAA	T,TA	.	germline;normal_artifact	.	93	224	1	UPSTREAM(MODIFIER||1058||NADK|retained_intron|CODING|ENST00000480499|)	CTTAGAAAAT[AA/-]AAAAAAAAAT	1	31,31,31	246231236	60,60,60	35,31	0.323,-8.469e+01	.	5.83,-8.417e+01	.	.	4.31,2.00	.	11,9,10	A	93	STR	93	93	4.39,107.87	.	29,1,53	40,6,64	0.023,0.626	0.053,0.593	83	110	16,1,31	20,4,35	13,0,20
chr1	1758959	C	T	UPSTREAM	MODIFIER	NADK		chr1	1758959	.	C	T	.	PASS	.	93	72	1	UPSTREAM(MODIFIER||384||NADK|protein_coding|CODING|ENST00000342348|)	GCGTTCCCTG[C/T]CTCCTAGCCC	93	38,32	276249	60,60	43	1.59	.	11.09	.	.	6	.	.	.	8	.	7	.	5.87	.	37,0	28,3	0.025	0.121	37	31	22,0	15,3	14,0
chr1	1865039	G	T	INTRON	MODIFIER	GNB1		chr1	1865039	.	G	T	.	weak_evidence	.	93	14	1	INTRON(MODIFIER||||GNB1|protein_coding|CODING|ENST00000378609|1)	GAGGCGGGCA[G/T]ATCACAAGGT	22	20,20	237181	60,60	50	0.999	.	2.7	.	.	6	.	.	.	1	.	32	.	3.17	.	9,0	3,2	0.091	0.428	9	5	5,0	2,2	4,0
chr1	1874419	G	C	INTRON	MODIFIER	GNB1		chr1	1874419	.	G	C	.	germline;weak_evidence	.	93	11	1	INTRON(MODIFIER||||GNB1|protein_coding|CODING|ENST00000378609|1)	GACCAGCCTG[G/C]GCAACACGGT	1	20,38	227275	60,60	47	0.954	.	2.4	.	.	1.1	.	.	.	1	.	11	.	3.2	.	8,0	2,1	0.1	0.4	8	3	3,0	2,1	5,0
chr1	1876492	CGA	C	INTRON	MODIFIER	GNB1		chr1	1876492	.	CGA	C	.	germline;slippage	.	93	15	1	INTRON(MODIFIER||||GNB1|protein_coding|CODING|ENST00000378609|1)	ATGTGCACAC[GA/-]GAGAGAGAGA	2	23,30	234212	60,60	42	0.728	.	2.34	.	.	6	.	11,10	GA	3	STR	50	1	8.05	.	8,0	2,3	0.095	0.571	8	5	4,0	0,2	3,0
chr1	1918487	C	A	NON_SYNONYMOUS_CODING	MODERATE	TMEM52		chr1	1918487	.	C	A	.	normal_artifact	.	93	416	1	NON_SYNONYMOUS_CODING(MODERATE|MISSENSE|Ggt/Tgt|G24C|TMEM52|protein_coding|CODING|ENST00000378602|1)	GCACCTGCAC[C/A]CTGGGGAATG	93	36,20	242252	60,60	30	-18.95	.	23.61	.	.	6	.	.	.	93	.	93	.	26.9	.	204,13	175,20	0.063	0.105	217	195	94,8	82,12	108,5
chr1	2187303	CT	C,CTT	UPSTREAM	MODIFIER	RP11-181G12.2		chr1	2187303	.	CT	C,CTT	.	germline;multiallelic;normal_artifact;slippage	.	93	71	1	UPSTREAM(MODIFIER||3429||RP11-181G12.2|antisense|NON_CODING|ENST00000333854|)	TTTCTTTTTC[T/-]TTTTTTTTTC	1	37,38,38	247245246	60,60,60	24,19	-1.746e+01,0.832	.	-1.761e+01,4.07	.	.	3.31,2.54	.	10,9,11	T	93	STR	93	1	19.65,7.83	.	7,11,1	8,13,5	0.556,0.065	0.474,0.203	19	26	1,5,1	3,5,0	4,5,0
chr1	2198302	AC	A	UPSTREAM	MODIFIER	FAAP20		chr1	2198302	.	AC	A	.	normal_artifact	.	93	123	1	UPSTREAM(MODIFIER||3529||FAAP20|protein_coding|CODING|ENST00000378546|)	ATCAGAGCCA[C/-]CCATCTCCTA	93	31,31	241261	60,60	40	-2.246	.	8.94	.	.	6	.	3,2	C	38	STR	77	93	9.56	.	52,2	53,8	0.053	0.133	54	61	33,0	28,7	19,2
chr1	2356177	T	C	UPSTREAM	MODIFIER	RP4-740C4.5		chr1	2356177	.	T	C	.	germline	.	93	20	1	UPSTREAM(MODIFIER||3357||RP4-740C4.5|processed_transcript|NON_CODING|ENST00000602865|)	GTGCCATCTG[T/C]GCAAATCCTG	1	20,20	224201	60,60	33	0.954	.	2.4	.	.	0.312	.	.	.	93	.	93	.	18.32	.	8,0	4,8	0.1	0.644	8	12	6,0	0,7	2,0
chr1	2378817	G	A	UTR_3_PRIME	MODIFIER	MORN1		chr1	2378817	.	G	A	.	PASS	.	93	27	1	UTR_3_PRIME(MODIFIER||405||MORN1|nonsense_mediated_decay|CODING|ENST00000378525|7)	AACTAGGAGT[G/A]TGGGGGACGG	43	39,32	250287	60,60	34	1.11	.	3.61	.	.	6	.	.	.	17	.	9	.	7.18	.	12,0	11,3	0.071	0.249	12	14	6,0	6,2	6,0
chr1	2400835	T	C	UPSTREAM	MODIFIER	RER1		chr1	2400835	.	T	C	.	normal_artifact	.	93	137	1	UPSTREAM(MODIFIER||1116||RER1|retained_intron|CODING|ENST00000462129|)	GTGCCCTCCC[T/C]GATGGTTGCT	93	36,35	240251	60,60	25	-0.6664	.	13.67	.	.	6	.	.	.	93	.	36	.	17.62	.	61,2	61,9	0.034	0.138	63	70	29,1	28,2	30,0
chr1	2629379	CCAG	C	CODON_DELETION	MODERATE	MMEL1		chr1	2629379	.	CCAG	C	.	normal_artifact;slippage	.	93	139	1	CODON_DELETION(MODERATE||ctg/|L35|MMEL1|protein_coding|CODING|ENST00000502556|1)	CAGCGGTCAC[CAG/-]CAGCAGCAGC	93	20,37	235215	49,54	37	-5.405	.	7.61	.	.	2.45	.	7,6	CAG	4	STR	32	1	7.32	.	62,3	52,3	0.059	0.07	65	55	29,2	32,2	30,1
chr1	2820633	T	TG	INTERGENIC	MODIFIER			chr1	2820633	.	T	TG	.	weak_evidence	.	93	24	1	INTERGENIC(MODIFIER||||||||)	TCAGGGTCTT[-/G]GGGGTACCAC	28	33,30	234260	60,60	38	1.05	.	2.95	.	.	6	.	4,5	G	1	STR	8	93	3.58	.	10,0	10,2	0.081	0.213	10	12	6,0	4,2	3,0
chr1	3412821	A	C	INTRON	MODIFIER	PRDM16		chr1	3412821	.	A	C	.	base_qual;strand_bias	.	93	333	1	INTRON(MODIFIER||||PRDM16|protein_coding|CODING|ENST00000270722|9)	CCCCAGCCTC[A/C]CTGGCTCTCC	93	22,14	236228	60,60	38	2.21	.	47.55	.	.	6	.	.	.	5	.	1	.	5.46	.	159,0	140,27	0.006114	0.092	159	167	80,0	75,0	75,0
chr1	3495918	C	CG	FRAME_SHIFT	HIGH	MEGF6		chr1	3495918	.	C	CG	.	strand_bias;weak_evidence	.	93	239	1	FRAME_SHIFT(HIGH||ccg/ccCg|P1281P?|MEGF6|protein_coding|CODING|ENST00000356575|30)	GGCTCTCCCC[-/G]GGGGGGCAGA	93	28,37	236277	60,60	54	1.72	.	28.98	.	.	6	.	6,7	G	1	STR	1	93	3.67	.	100,0	120,4	0.009639	0.04	100	124	64,0	64,2	35,0
chr1	3508562	A	C	NON_SYNONYMOUS_CODING	MODERATE	MEGF6		chr1	3508562	.	A	C	.	base_qual;strand_bias	.	93	305	1	NON_SYNONYMOUS_CODING(MODERATE|MISSENSE|aaT/aaG|N552K|MEGF6|protein_coding|CODING|ENST00000356575|13)	CCTCACTCTC[A/C]TTGCAGATGA	93	32,14	238208	60,60	27	2.19	.	46.02	.	.	6	.	.	.	46	.	1	.	9.69	.	154,0	124,19	0.006377	0.09	154	143	78,0	57,0	70,0
chr1	3575039	A	G	INTRON	MODIFIER	MEGF6		chr1	3575039	.	A	G	.	weak_evidence	.	93	10	1	INTRON(MODIFIER||||MEGF6|protein_coding|CODING|ENST00000356575|4)	CTGAGACCAG[A/G]TCAAGAGATC	7	20,34	237318	60,60	8	0.953	.	2.39	.	.	4.61	.	.	.	1	.	15	.	3.1	.	8,0	1,1	0.1	0.5	8	2	4,0	1,1	4,0
chr1	3781609	GA	G	UPSTREAM	MODIFIER	RN7SL574P		chr1	3781609	.	GA	G	.	weak_evidence	.	93	123	1	UPSTREAM(MODIFIER||1205||RN7SL574P|misc_RNA|NON_CODING|ENST00000581512|)	ACCTTAAAAG[A/-]AAAAAACATT	93	20,20	240227	60,60	40	1.75	.	15.51	.	.	6	.	7,6	A	1	STR	87	93	3.12	.	54,0	51,8	0.018	0.113	54	59	24,0	23,1	26,0
chr1	3869564	C	T	INTRON	MODIFIER	DFFB		chr1	3869564	.	C	T	.	normal_artifact	.	93	169	1	INTRON(MODIFIER||||DFFB|protein_coding|CODING|ENST00000378209|4)	GGTTTTGGGG[C/T]GCTGTGCACC	93	38,31	254255	60,60	36	-8.69	.	5.29	.	.	3.38	.	.	.	93	.	5	.	24.58	.	72,5	71,11	0.075	0.143	77	82	36,4	35,4	36,1
chr1	3933507	C	T	INTERGENIC	MODIFIER			chr1	3933507	.	C	T	.	weak_evidence	.	93	16	1	INTERGENIC(MODIFIER||||||||)	GTTGGCCAGG[C/T]TGGTCTCAAA	26	37,20	227228	60,60	36	1.09	.	3.3	.	.	6	.	.	.	1	.	35	.	3.45	.	11,0	2,2	0.075	0.499	11	4	6,0	2,2	5,0
chr1	4711886	TC	T	INTRON	MODIFIER	AJAP1		chr1	4711886	.	TC	T	.	normal_artifact	.	93	562	1	INTRON(MODIFIER||||AJAP1|protein_coding|CODING|ENST00000378191|1|INFO_REALIGN_3_PRIME)	TCTCTCCTTT[C/-]CCCCCCGCAC	93	21,34	227238	60,60	40	-26.24	.	13.26	.	.	4.31	.	7,6	C	93	STR	93	93	19.15	.	233,25	251,23	0.089	0.07	258	274	128,14	123,13	98,9
chr1	4712522	GCCA	G	DOWNSTREAM	MODIFIER	AJAP1		chr1	4712522	.	GCCA	G	.	normal_artifact;slippage	.	93	872	1	DOWNSTREAM(MODIFIER||358||AJAP1|processed_transcript|CODING|ENST00000466761|)	ACTGTGGCCG[CCA/-]CCACCACCAC	93	29,29	234235	60,60	37	-16.66	.	76.45	.	.	4.61	.	7,6	CCA	82	STR	93	1	16.17	.	373,10	347,11	0.028	0.032	383	358	172,3	187,5	184,7
chr1	4849332	C	T	INTERGENIC	MODIFIER			chr1	4849332	.	C	T	.	weak_evidence	.	93	14	1	INTERGENIC(MODIFIER||||||||)	CCTTCTGTAA[C/T]CATAGTAAAT	22	28,20	248262	60,60	19	0.999	.	2.7	.	.	6	.	.	.	1	.	32	.	3.15	.	9,0	3,2	0.091	0.427	9	5	3,0	3,2	6,0
chr1	5247908	G	A	INTERGENIC	MODIFIER			chr1	5247908	.	G	A	.	germline	.	93	15	1	INTERGENIC(MODIFIER||||||||)	TACTTAGGAG[G/A]CTGAGGCAGA	1	20,23	183220	60,60	44	0.951	.	2.35	.	.	0.359	.	.	.	25	.	61	.	9.03	.	8,0	3,4	0.101	0.556	8	7	4,0	1,1	3,0
chr1	5813674	GGAGGAGGAGGAGGAT	G	INTERGENIC	MODIFIER			chr1	5813674	.	GGAGGAGGAGGAGGAT	G	.	weak_evidence	.	93	63	1	INTERGENIC(MODIFIER||||||||)	GGACGAGGAG[GAGGAGGAGGAGGAT/-]GAGGAGGAGG	93	36,31	224233	60,60	38	1.5	.	8.57	.	.	6	.	.	.	1	.	93	.	3.68	.	29,0	19,2	0.031	0.129	29	21	16,0	7,0	8,0
chr1	6087235	T	C	DOWNSTREAM	MODIFIER	KCNAB2		chr1	6087235	.	T	C	.	PASS	.	93	34	1	DOWNSTREAM(MODIFIER||1986||KCNAB2|retained_intron|CODING|ENST00000435937|)	TCCCACTGCC[T/C]GACTCACAGT	65	37,37	279323	60,60	70	1.26	.	5.12	.	.	6	.	.	.	31	.	9	.	8.44	.	17,0	14,3	0.053	0.21	17	17	6,0	8,3	11,0
chr1	6113423	CAA	C,CA,CAAA	INTRON	MODIFIER	CHD5		chr1	6113423	.	CAA	C,CA,CAAA	.	germline;multiallelic;normal_artifact	.	93	175	1	INTRON(MODIFIER||||CHD5|protein_coding|CODING|ENST00000262450|33)	ACGCTGTTTC[AA/-]AAAAAAACAG	1	27,32,37,36	222244227224	60,60,60,60	51,47,43	-4.445e+00,-6.051e+01,-3.790e-01	.	-4.042e+00,-6.507e+01,15.15	.	.	6.00,3.71,6.00	.	9,7,8,10	A	93	STR	93	93	10.14,42.64,16.12	.	30,5,38,3	28,9,32,17	0.065,0.485,0.036	0.105,0.378,0.190	76	86	13,3,22,2	11,3,14,5	17,2,14,0
chr1	6143808	A	C	INTRON	MODIFIER	CHD5		chr1	6143808	.	A	C	.	base_qual;normal_artifact;strand_bias;weak_evidence	.	93	118	1	INTRON(MODIFIER||||CHD5|protein_coding|CODING|ENST00000262450|13)	CTGCTGCCCC[A/C]CCCTCCCCAC	93	30,11	241241	60,60	9	-1.453	.	11.02	.	.	6	.	.	.	1	.	1	.	4.14	.	56,3	53,3	0.041	0.069	59	56	17,0	22,0	35,1
chr1	6144029	G	C	SYNONYMOUS_CODING	LOW	CHD5		chr1	6144029	.	G	C	.	normal_artifact	.	93	440	1	SYNONYMOUS_CODING(LOW|SILENT|ggC/ggG|G643|CHD5|protein_coding|CODING|ENST00000262450|12)	CCCACCTGTG[G/C]CCCCAGTAGG	93	37,25	240233	60,60	44	-12.55	.	32.11	.	.	6	.	.	.	93	.	83	.	34.97	.	202,10	194,20	0.049	0.092	212	214	105,5	98,7	92,5
chr1	6422207	G	A	UPSTREAM	MODIFIER	HES2		chr1	6422207	.	G	A	.	PASS	.	93	18	1	UPSTREAM(MODIFIER||2288||HES2|protein_coding|CODING|ENST00000377834|)	TTCGAGACCA[G/A]CCTGGCCAAC	13	20,20	198262	60,60	22	0.999	.	2.7	.	.	6	.	.	.	20	.	88	.	8.88	.	9,0	3,6	0.091	0.625	9	9	2,0	1,2	7,0
chr1	6462546	G	A	DOWNSTREAM	MODIFIER	ESPN		chr1	6462546	.	G	A	.	normal_artifact	.	93	623	1	DOWNSTREAM(MODIFIER||1602||ESPN|protein_coding|CODING|ENST00000377828|)	GGTGCTGGCC[G/A]CGTGCCAAGC	93	20,31	232250	60,60	39	-36.55	.	15.79	.	.	2.95	.	.	.	93	.	93	.	58.61	.	267,21	282,34	0.075	0.109	288	316	117,10	145,17	144,11
chr1	6469122	TTCC	T	CODON_CHANGE_PLUS_CODON_DELETION	MODERATE	PLEKHG5		chr1	6469122	.	TTCC	T	.	normal_artifact;slippage	.	93	448	1	CODON_CHANGE_PLUS_CODON_DELETION(MODERATE||gaggaa/gaa|EE722E|PLEKHG5|protein_coding|CODING|ENST00000377725|19)	GTCCTCGCCT[TCC/-]TCCTCCTCCT	93	31,35	243258	60,60	40	-15.23	.	22.21	.	.	4.6	.	8,7	TCC	3	STR	19	1	7.6	.	170,9	175,5	0.05	0.032	179	180	57,4	67,1	84,5
chr1	6785517	CGAG	C	UPSTREAM	MODIFIER	RP11-312B8.1		chr1	6785517	.	CGAG	C	.	slippage;weak_evidence	.	93	72	1	UPSTREAM(MODIFIER||675||RP11-312B8.1|antisense|NON_CODING|ENST00000442889|)	TCCCGGTCGC[GAG/-]GAGGAGGAGG	93	20,20	225159	60,60	37	1.5	.	9.31	.	.	2.8	.	4,3	GAG	1	STR	32	1	3.27	.	31,0	36,3	0.03	0.096	31	39	13,0	16,3	16,0
chr1	6806822	A	T	INTRON	MODIFIER	CAMTA1		chr1	6806822	.	A	T	.	PASS	.	93	19	1	INTRON(MODIFIER||||CAMTA1|protein_coding|CODING|ENST00000303635|1)	TTACAATAAA[A/T]TTGTGACATT	14	35,31	306287	60,60	41	0.951	.	2.36	.	.	6	.	.	.	55	.	43	.	11.8	.	8,0	6,5	0.101	0.461	8	11	3,0	2,3	4,0
chr1	7322949	C	CCCTGG	INTRON	MODIFIER	CAMTA1		chr1	7322949	.	C	CCCTGG	.	germline;weak_evidence	.	93	10	1	INTRON(MODIFIER||||CAMTA1|protein_coding|CODING|ENST00000303635|5|INFO_REALIGN_3_PRIME)	CTTTCCCTCC[-/CCTGG]CCTCCCCTCC	1	36,30	230244	60,60	30	0.954	.	2.41	.	.	6	.	.	.	1	.	93	.	3.72	.	8,0	1,1	0.1	0.5	8	2	3,0	1,0	5,0
chr1	7467769	TCTTC	T	INTRON	MODIFIER	CAMTA1		chr1	7467769	.	TCTTC	T	.	normal_artifact;slippage;weak_evidence	.	93	500	1	INTRON(MODIFIER||||CAMTA1|protein_coding|CODING|ENST00000303635|5|INFO_REALIGN_3_PRIME)	GTTGCGCCGT[CTTC/-]CTTCCTTCCT	93	20,25	235240	60,60	44	0.259	.	66.56	.	.	4.61	.	5,4	CTTC	1	STR	50	1	7.69	.	236,1	220,5	0.008255	0.026	237	225	101,1	87,0	101,0
chr1	7771440	G	C	UPSTREAM	MODIFIER	VAMP3		chr1	7771440	.	G	C	.	normal_artifact	.	93	314	1	UPSTREAM(MODIFIER||1267||VAMP3|protein_coding|CODING|ENST00000470357|)	GGCAGCTCGC[G/C]CTGGGACCGC	93	20,29	223211	60,60	36	-17.68	.	7.41	.	.	6	.	.	.	93	.	50	.	21.24	.	132,11	150,13	0.078	0.082	143	163	59,8	80,11	70,2
chr1	8324509	A	C	SYNONYMOUS_CODING	LOW	SLC45A1		chr1	8324509	.	A	C	.	base_qual;normal_artifact;strand_bias;weak_evidence	.	93	554	1	SYNONYMOUS_CODING(LOW|SILENT|ccA/ccC|P60|SLC45A1|protein_coding|CODING|ENST00000289877|1)	GTCCCTCCCC[A/C]CCCCCGCCCC	93	31,11	232246	60,60	5	-5.843	.	39.48	.	.	1.43	.	.	.	2	.	1	.	4.98	.	224,20	253,25	0.052	0.054	244	278	88,2	84,4	113,0
chr1	8325425	GA	G	UPSTREAM	MODIFIER	SLC45A1		chr1	8325425	.	GA	G	.	normal_artifact;slippage	.	93	232	1	UPSTREAM(MODIFIER||4712||SLC45A1|retained_intron|CODING|ENST00000497660|)	AATGGAGAGG[A/-]AAAAAAAAAG	51	20,20	228239	60,60	28	-7.883	.	3.88	.	.	2.32	.	10,9	A	93	STR	93	1	23.19	.	83,14	90,31	0.117	0.23	97	121	49,7	35,12	24,6
chr1	8358719	G	A	SYNONYMOUS_CODING	LOW	RERE		chr1	8358719	.	G	A	.	normal_artifact	.	93	481	1	SYNONYMOUS_CODING(LOW|SILENT|caC/caT|H1272|RERE|protein_coding|CODING|ENST00000337907|21)	TGTAGAAGGG[G/A]TGGTTGCGGT	93	35,32	238242	60,60	37	-23.31	.	23.33	.	.	6	.	.	.	93	.	93	.	44.31	.	222,14	212,26	0.06	0.111	236	238	130,9	98,10	87,4
chr1	8843055	G	A	INTERGENIC	MODIFIER			chr1	8843055	.	G	A	.	weak_evidence	.	93	15	1	INTERGENIC(MODIFIER||||||||)	CTGGATTAGC[G/A]TGGGCTTTCA	9	21,20	241220	60,60	40	1.02	.	2.7	.	.	4.61	.	.	.	1	.	32	.	3.17	.	9,0	3,2	0.088	0.428	9	5	6,0	1,2	3,0
chr1	9014989	C	A	INTRON	MODIFIER	SLC2A7		chr1	9014989	.	C	A	.	normal_artifact;weak_evidence	.	93	67	1	INTRON(MODIFIER||||SLC2A7|protein_coding|CODING|ENST00000400906|6)	CCAGTTGCCA[C/A]CCCCCCACCC	93	36,20	248222	60,60	35	0.079	.	6.54	.	.	6	.	.	.	1	.	21	.	3.67	.	30,2	28,5	0.063	0.12	32	33	12,1	10,1	15,1
chr1	9037599	G	A	NON_SYNONYMOUS_CODING	MODERATE	SLC2A5		chr1	9037599	.	G	A	.	normal_artifact	.	93	215	1	NON_SYNONYMOUS_CODING(MODERATE|MISSENSE|aCt/aTt|T498I|SLC2A5|protein_coding|CODING|ENST00000377424|12)	CTGTTCCGAA[G/A]TGACAGGTGG	93	36,35	238217	60,60	32	-8.075	.	13.48	.	.	6	.	.	.	5	.	14	.	5.58	.	100,5	97,5	0.055	0.056	105	102	54,2	44,3	45,3
chr1	9611908	C	G	DOWNSTREAM	MODIFIER	TMEM201		chr1	9611908	.	C	G	.	base_qual;normal_artifact;strand_bias	.	93	209	2	DOWNSTREAM(MODIFIER||4223||TMEM201|processed_transcript|CODING|ENST00000510900|)	CCCTGAGGTG[C/G]GGGAGGGGAG	93	30,10	227229	60,60	31	-3.509	.	13.78	.	.	6	.	.	.	35	.	1	.	8.65	.	81,4	96,11	0.056	0.088	85	107	31,0	41,0	43,0
chr1	9611912	A	T	DOWNSTREAM	MODIFIER	TMEM201		chr1	9611912	.	A	T	.	base_qual;normal_artifact;strand_bias;weak_evidence	.	93	198	2	DOWNSTREAM(MODIFIER||4227||TMEM201|processed_transcript|CODING|ENST00000510900|)	GAGGTGCGGG[A/T]GGGGAGGGGG	93	33,7	230229	60,60	26	-0.1391	.	16.55	.	.	6	.	.	.	2	.	1	.	4.85	.	77,4	98,9	0.05	0.069	81	107	24,0	34,1	34,0
chr1	9715830	AG	CC	UPSTREAM	MODIFIER	PIK3CD		chr1	9715830	.	AG	CC	.	clustered_events;haplotype;normal_artifact;strand_bias	.	93	672	5	UPSTREAM(MODIFIER||446||PIK3CD|retained_intron|CODING|ENST00000479223|)	CCGCTGACCC[AG/CC]CCCTCCCCAC	93	37,24	245244	60,60	11	-24.53	.	40.85	.	.	6	.	.	.	93	.	1	.	26.84	.	291,15	339,17	0.047	0.044	306	356	137,3	148,7	139,7
chr1	9715835	T	C	UPSTREAM	MODIFIER	PIK3CD		chr1	9715835	.	T	C	.	base_qual;clustered_events;haplotype;normal_artifact;strand_bias	.	93	664	5	UPSTREAM(MODIFIER||441||PIK3CD|retained_intron|CODING|ENST00000479223|)	GACCCAGCCC[T/C]CCCCACCCCG	93	33,10	244245	60,60	7	-24.06	.	41.42	.	.	6	.	.	.	93	.	1	.	26.16	.	288,14	346,15	0.045	0.041	302	361	135,0	145,2	131,1
chr1	9715840	A	C	UPSTREAM	MODIFIER	PIK3CD		chr1	9715840	.	A	C	.	clustered_events;normal_artifact;strand_bias	.	93	658	5	UPSTREAM(MODIFIER||436||PIK3CD|retained_intron|CODING|ENST00000479223|)	AGCCCTCCCC[A/C]CCCCGCAGGC	93	31,25	243249	60,60	8	-21.02	.	44.02	.	.	6	.	.	.	93	.	1	.	27.55	.	280,11	336,17	0.036	0.042	291	353	123,1	118,6	118,5
chr1	9715845	G	C	UPSTREAM	MODIFIER	PIK3CD		chr1	9715845	.	G	C	.	clustered_events;haplotype;normal_artifact;strand_bias	.	93	663	5	UPSTREAM(MODIFIER||431||PIK3CD|retained_intron|CODING|ENST00000479223|)	TCCCCACCCC[G/C]CAGGCCTCCA	93	37,35	242253	60,60	3	-7.078	.	70.7	.	.	6	.	.	.	68	.	1	.	13.49	.	293,5	357,7	0.017	0.022	298	364	136,1	162,3	135,3
chr1	9715846	CAGG	C	FRAME_SHIFT	HIGH	PIK3CD		chr1	9715846	.	CAGG	C	.	clustered_events;haplotype;normal_artifact;strand_bias;weak_evidence	.	93	680	5	FRAME_SHIFT(HIGH||ggc/|G124|PIK3CD|protein_coding|CODING|ENST00000361110|4)	CCCACCCCGC[AGG/-]CCTCCACGAG	93	37,20	242253	60,60	2	-7.074	.	70.68	.	.	6	.	.	.	1	.	1	.	8.14	.	293,5	361,5	0.017	0.016	298	366	138,1	165,3	144,4
chr1	9749900	GT	G	FRAME_SHIFT	HIGH	CLSTN1		chr1	9749900	.	GT	G	.	normal_artifact;weak_evidence	.	93	202	1	FRAME_SHIFT(HIGH||aac/|N221|CLSTN1|protein_coding|CODING|ENST00000377298|6)	TTTCTCTGTG[T/-]TTTTTATATA	93	20,36	234240	60,60	35	-9.223	.	5.41	.	.	6	.	6,5	T	1	STR	57	93	3.48	.	86,8	93,7	0.088	0.06	94	100	43,5	45,3	39,3
chr1	10015705	TA	T	INTRON	MODIFIER	RBP7		chr1	10015705	.	TA	T	.	weak_evidence	.	93	128	1	INTRON(MODIFIER||||RBP7|protein_coding|CODING|ENST00000294435|3|INFO_REALIGN_3_PRIME)	AAAACACAAT[A/-]AAAAATAAGT	93	31,31	247251	60,60	19	1.74	.	16.3	.	.	6	.	6,5	A	1	STR	4	93	5.13	.	58,1	61,4	0.018	0.075	59	65	35,0	31,2	19,1
chr1	10117505	C	T	NON_SYNONYMOUS_CODING	MODERATE	UBE4B		chr1	10117505	.	C	T	.	normal_artifact	.	93	233	1	NON_SYNONYMOUS_CODING(MODERATE|MISSENSE|Cat/Tat|H415Y|UBE4B|protein_coding|CODING|ENST00000343090|8)	CTACAGTGAC[C/T]ATTTCACCAT	93	20,31	230235	60,60	43	-11.79	.	7.57	.	.	6	.	.	.	93	.	60	.	25.16	.	102,8	109,13	0.079	0.112	110	122	59,6	35,6	41,2
chr1	10295463	G	A	UPSTREAM	MODIFIER	RNU6-37P		chr1	10295463	.	G	A	.	normal_artifact	.	93	81	1	UPSTREAM(MODIFIER||3503||RNU6-37P|snRNA|NON_CODING|ENST00000362692|)	TGGTATATCA[G/A]TGCTCCTTGT	93	37,35	251278	60,60	11	-0.7977	.	7.44	.	.	6	.	.	.	10	.	4	.	6.18	.	37,1	38,3	0.049	0.093	38	41	17,1	22,2	20,0
chr1	10400659	AT	A	DOWNSTREAM	MODIFIER	PGD		chr1	10400659	.	AT	A	.	normal_artifact;slippage	.	93	154	1	DOWNSTREAM(MODIFIER||652||PGD|retained_intron|CODING|ENST00000487775|)	ACTCTAGAGA[T/-]TTTTTTTTTT	93	31,31	249270	60,60	26	-4.469	.	5.95	.	.	2.88	.	11,10	T	17	STR	5	1	7.41	.	61,6	59,6	0.087	0.105	67	65	23,4	28,5	35,2
chr1	10500851	A	T	INTRON	MODIFIER	PEX14		chr1	10500851	.	A	T	.	weak_evidence	.	93	13	1	INTRON(MODIFIER||||PEX14|protein_coding|CODING|ENST00000356607|2)	CTGGGATTGC[A/T]GGCATGAGCC	17	20,20	198224	60,60	38	0.954	.	2.4	.	.	6	.	.	.	1	.	35	.	3.48	.	8,0	2,2	0.1	0.517	8	4	4,0	1,2	4,0
chr1	11037653	G	A	DOWNSTREAM	MODIFIER	MASP2		chr1	11037653	.	G	A	.	normal_artifact	.	93	144	1	DOWNSTREAM(MODIFIER||40||MASP2|retained_intron|CODING|ENST00000478645|)	ACATTTCAAA[G/A]CAATCGTCAT	93	37,24	249256	60,60	27	-4.299	.	6.25	.	.	6	.	.	.	65	.	36	.	11.7	.	56,4	68,7	0.079	0.103	60	75	28,2	36,3	27,2
chr1	11069680	G	A	SYNONYMOUS_CODING	LOW	EXOSC10		chr1	11069680	.	G	A	.	normal_artifact	.	93	229	1	SYNONYMOUS_CODING(LOW|SILENT|acC/acT|T789|EXOSC10|protein_coding|CODING|ENST00000376936|22)	TCTGTTCTGT[G/A]GTCCTTGGGT	93	26,32	231221	60,60	32	-6.144	.	17.67	.	.	6	.	.	.	93	.	93	.	29.5	.	105,4	98,16	0.044	0.143	109	114	39,2	40,6	62,2
chr1	11098007	G	A	UPSTREAM	MODIFIER	RP4-635E18.6		chr1	11098007	.	G	A	.	normal_artifact	.	93	169	1	UPSTREAM(MODIFIER||1668||RP4-635E18.6|antisense|NON_CODING|ENST00000435388|)	AGAAAACAAA[G/A]TACAGTACTT	93	37,34	236232	60,60	43	-9.778	.	3.91	.	.	6	.	.	.	93	.	38	.	19.05	.	76,7	71,10	0.086	0.126	83	81	43,2	31,2	31,4
chr1	11109279	G	A	INTRON	MODIFIER	MTOR		chr1	11109279	.	G	A	.	normal_artifact	.	93	263	1	INTRON(MODIFIER||||MTOR|protein_coding|CODING|ENST00000361445|56)	GTAAACACAT[G/A]ACACACTCAC	93	37,20	241229	60,60	37	-8.807	.	10.39	.	.	6	.	.	.	73	.	45	.	12.43	.	101,8	135,10	0.079	0.073	109	145	51,2	56,3	49,6
chr1	11167522	G	A	INTRON	MODIFIER	MTOR		chr1	11167522	.	G	A	.	normal_artifact	.	93	145	1	INTRON(MODIFIER||||MTOR|protein_coding|CODING|ENST00000361445|28)	TTAATGCTGA[G/A]AAAACAAAGG	93	20,33	220235	60,60	57	-3.341	.	10.32	.	.	6	.	.	.	43	.	14	.	9.43	.	68,4	63,5	0.066	0.086	72	68	38,2	32,2	27,2
chr1	11212831	CAACTT	C	FRAME_SHIFT	HIGH	MTOR		chr1	11212831	.	CAACTT	C	.	PASS	.	93	137	1	FRAME_SHIFT(HIGH||aagttg/|KL1120|MTOR|protein_coding|CODING|ENST00000361445|22)	GGCATCAAAC[AACTT/-]AACAATAGGA	93	20,35	239210	60,60	54	1.9	.	23.47	.	.	6	.	.	.	69	.	93	.	14.16	.	78,0	51,5	0.012	0.103	78	56	27,0	30,3	47,0
chr1	11311192	GT	G	INTERGENIC	MODIFIER			chr1	11311192	.	GT	G	.	weak_evidence	.	93	10	1	INTERGENIC(MODIFIER||||||||)	TCATCCTCTG[T/-]TTTTTTATGT	8	28,33	189310	60,60	37	0.946	.	2.29	.	.	6	.	7,6	T	1	STR	51	93	5.76	.	8,0	0,2	0.102	0.75	8	2	6,0	0,1	2,0
chr1	11315414	A	C	INTERGENIC	MODIFIER			chr1	11315414	.	A	C	.	strand_bias	.	93	59	1	INTERGENIC(MODIFIER||||||||)	ACGGAGGCTC[A/C]TGCCTGTAAT	93	20,28	223256	60,60	51	1.38	.	6.9	.	.	6	.	.	.	3	.	1	.	5.23	.	23,0	29,5	0.04	0.144	23	34	9,0	16,0	13,0
chr1	11519482	C	T	SYNONYMOUS_CODING	LOW	DISP3		chr1	11519482	.	C	T	.	normal_artifact	.	93	921	1	SYNONYMOUS_CODING(LOW|SILENT|Ctg/Ttg|L673|DISP3|protein_coding|CODING|ENST00000294484|8)	CATCCCCTTG[C/T]TGGAGGTCGA	93	20,20	229233	60,60	39	-54.19	.	13.35	.	.	6	.	.	.	93	.	70	.	31.6	.	375,39	463,28	0.091	0.054	414	491	178,23	227,10	188,13
chr1	11680162	AT	A	INTRON	MODIFIER	MAD2L2		chr1	11680162	.	AT	A	.	PASS	.	93	67	1	INTRON(MODIFIER||||MAD2L2|protein_coding|CODING|ENST00000376692|3)	GCCCGGCTAA[T/-]TTTTGTATTT	93	35,34	281263	60,60	11	1.49	.	8.7	.	.	6	.	5,4	T	35	STR	8	93	9.35	.	29,0	29,5	0.031	0.166	29	34	13,0	14,1	15,0
chr1	11772237	C	T	NON_SYNONYMOUS_CODING	MODERATE	C1orf167		chr1	11772237	.	C	T	.	normal_artifact	.	93	278	1	NON_SYNONYMOUS_CODING(MODERATE|MISSENSE|Cac/Tac|H680Y|C1orf167|protein_coding|CODING|ENST00000433342|8)	GAGCCCCCAG[C/T]ACCAGAGAGC	93	37,31	238244	60,60	35	-16.06	.	4.58	.	.	6	.	.	.	93	.	93	.	58.85	.	110,9	120,30	0.082	0.201	119	150	52,4	59,13	56,4
chr1	11800680	T	G	INTRON	MODIFIER	MTHFR		chr1	11800680	.	T	G	.	weak_evidence	.	93	22	1	INTRON(MODIFIER||||MTHFR|protein_coding|CODING|ENST00000376592|2)	CCTGGGAGAA[T/G]TTTCTACTCA	36	35,35	274259	60,60	30	0.954	.	2.41	.	.	6	.	.	.	1	.	9	.	4.9	.	8,0	11,2	0.1	0.199	8	13	2,0	6,2	6,0
chr1	11819639	C	T	INTRON	MODIFIER	CLCN6		chr1	11819639	.	C	T	.	normal_artifact	.	93	144	1	INTRON(MODIFIER||||CLCN6|protein_coding|CODING|ENST00000346436|5)	TAACAGTAAG[C/T]ATAGTATTAG	93	38,31	248249	60,60	29	-4.207	.	8.48	.	.	6	.	.	.	17	.	21	.	6.89	.	61,3	70,5	0.061	0.077	64	75	29,2	31,0	29,1
chr1	11838429	C	T	NON_SYNONYMOUS_CODING	MODERATE	CLCN6		chr1	11838429	.	C	T	.	normal_artifact	.	93	830	1	NON_SYNONYMOUS_CODING(MODERATE|MISSENSE|cCg/cTg|P797L|CLCN6|protein_coding|CODING|ENST00000346436|21)	CTGCTCAACC[C/T]GCGCATGATC	93	30,20	239229	60,60	41	-40.18	.	39.55	.	.	6	.	.	.	93	.	93	.	75.48	.	396,30	337,40	0.07	0.106	426	377	194,13	164,13	198,17
chr1	11846260	C	A	UPSTREAM	MODIFIER	NPPA-AS1_3		chr1	11846260	.	C	A	.	PASS	.	93	45	1	UPSTREAM(MODIFIER||1182||NPPA-AS1_3|misc_RNA|NON_CODING|ENST00000617059|)	GCTAATCAGC[C/A]ATGCAAAGAT	81	37,33	271280	60,60	17	1.39	.	6.82	.	.	6	.	.	.	39	.	10	.	9.28	.	23,0	16,4	0.04	0.226	23	20	11,0	11,4	10,0
chr1	11858870	TCTG	T	UTR_5_PRIME	MODIFIER	NPPB		chr1	11858870	.	TCTG	T	.	normal_artifact;slippage	.	93	531	1	UTR_5_PRIME(MODIFIER||38||NPPB|protein_coding|CODING|ENST00000376468|1)	GCTGCTGCTT[CTG/-]CTGCTGCTGC	93	33,34	243264	60,60	55	-2.998	.	42.08	.	.	2.19	.	7,6	CTG	5	STR	3	1	8.38	.	169,2	187,4	0.017	0.025	171	191	74,1	109,1	93,1
chr1	11925545	G	T	SYNONYMOUS_CODING	LOW	KIAA2013		chr1	11925545	.	G	T	.	normal_artifact	.	93	219	1	SYNONYMOUS_CODING(LOW|SILENT|gcC/gcA|A231|KIAA2013|protein_coding|CODING|ENST00000376576|1)	TACTGGTGAA[G/T]GCCTTGGGGG	93	36,32	242238	45,45	45	-13.09	.	5.92	.	.	6	.	.	.	43	.	39	.	9.42	.	104,9	94,7	0.086	0.077	113	101	60,4	36,3	40,5
chr1	11925679	G	A	SYNONYMOUS_CODING	LOW	KIAA2013		chr1	11925679	.	G	A	.	normal_artifact	.	93	175	1	SYNONYMOUS_CODING(LOW|SILENT|Ctg/Ttg|L187|KIAA2013|protein_coding|CODING|ENST00000376576|1)	TCTTGCAGCA[G/A]CACGCAGTCG	93	37,34	238286	57,54	25	-5.04	.	12.97	.	.	6	.	.	.	14	.	14	.	6.64	.	80,3	82,4	0.047	0.057	83	86	37,2	46,1	42,1
chr1	11947868	T	C	INTRON	MODIFIER	PLOD1		chr1	11947868	.	T	C	.	normal_artifact;weak_evidence	.	93	79	1	INTRON(MODIFIER||||PLOD1|protein_coding|CODING|ENST00000196061|1)	TGGGTTGACA[T/C]GAAGACACTT	93	32,36	259260	60,60	67	-0.8506	.	6.8	.	.	6	.	.	.	1	.	5	.	3.62	.	35,1	39,2	0.052	0.07	36	41	24,0	19,2	10,1
chr1	11966278	A	T	NON_SYNONYMOUS_CODING	MODERATE	PLOD1		chr1	11966278	.	A	T	.	normal_artifact	.	93	353	1	NON_SYNONYMOUS_CODING(MODERATE|MISSENSE|Aac/Tac|N538Y|PLOD1|protein_coding|CODING|ENST00000196061|15)	CATCCACCAG[A/T]ACTACACCAA	93	20,20	221219	60,60	49	-11.16	.	23.61	.	.	6	.	.	.	93	.	93	.	58.61	.	162,9	144,33	0.056	0.187	171	177	88,6	75,11	74,3
chr1	12007167	C	T	NON_SYNONYMOUS_CODING	MODERATE	MFN2		chr1	12007167	.	C	T	.	normal_artifact	.	93	319	1	NON_SYNONYMOUS_CODING(MODERATE|MISSENSE|Cgc/Tgc|R663C|MFN2|protein_coding|CODING|ENST00000235329|17)	GGCCTTCAAG[C/T]GCCAGTTTGT	93	20,30	229227	60,60	45	-17.61	.	7.24	.	.	4.01	.	.	.	93	.	93	.	46.13	.	135,12	142,25	0.086	0.153	147	167	62,4	73,14	70,8
chr1	12123766	G	A	SYNONYMOUS_CODING	LOW	TNFRSF8		chr1	12123766	.	G	A	.	normal_artifact	.	93	641	1	SYNONYMOUS_CODING(LOW|SILENT|ctG/ctA|L364|TNFRSF8|protein_coding|CODING|ENST00000263932|10)	GTAAGACGCT[G/A]CCCATCCCAA	93	20,20	229233	60,60	39	-27.35	.	35.79	.	.	6	.	.	.	93	.	93	.	37.92	.	312,23	270,30	0.068	0.097	335	300	179,8	149,17	125,11
chr1	12191074	G	A	NON_SYNONYMOUS_CODING	MODERATE	TNFRSF1B		chr1	12191074	.	G	A	.	normal_artifact	.	93	412	1	NON_SYNONYMOUS_CODING(MODERATE|MISSENSE|cGc/cAc|R99H|TNFRSF1B|protein_coding|CODING|ENST00000376259|3)	TGTGGCTCCC[G/A]CTGTAGCTCT	93	30,30	238242	60,60	23	-25.24	.	10.97	.	.	6	.	.	.	93	.	37	.	16.29	.	190,16	182,12	0.081	0.065	206	194	95,8	100,5	93,8
chr1	12308648	GTT	G,GT,GTTT	UPSTREAM	MODIFIER	VPS13D		chr1	12308648	.	GTT	G,GT,GTTT	.	germline;multiallelic;normal_artifact	.	93	106	1	UPSTREAM(MODIFIER||2877||VPS13D|processed_transcript|CODING|ENST00000487188|)	CAAGTGAGTG[TT/-]TTTTTTTTTT	1	36,35,25,28	254245239258	60,60,60,60	50,27,21	-2.546e+01,-2.471e+01,0.651	.	-4.187e+01,-3.827e+01,8.40	.	.	1.68,6.00,2.63	.	15,13,14,16	T	93	STR	93	93	32.28,23.28,3.00	.	6,14,19,2	1,21,14,2	0.348,0.432,0.047	0.510,0.373,0.070	41	38	2,5,4,1	0,12,6,2	4,6,10,1
chr1	12795956	C	G	STOP_GAINED	HIGH	PRAMEF1		chr1	12795956	.	C	G	.	haplotype;map_qual;normal_artifact	.	93	151	2	STOP_GAINED(HIGH|NONSENSE|tCa/tGa|S462*|PRAMEF1|protein_coding|CODING|ENST00000332296|4)	TCCTGTGGCT[C/G]ATCACCGTCT	93	38,38	255178	48,23	18	-0.7564	.	17.77	.	.	1.37	.	.	.	3	.	4	.	5.35	.	73,1	72,3	0.026	0.052	74	75	35,0	35,1	38,1
chr1	12795962	C	T	NON_SYNONYMOUS_CODING	MODERATE	PRAMEF1		chr1	12795962	.	C	T	.	haplotype;map_qual;normal_artifact;weak_evidence	.	93	144	2	NON_SYNONYMOUS_CODING(MODERATE|MISSENSE|cCg/cTg|P464L|PRAMEF1|protein_coding|CODING|ENST00000332296|4)	GGCTCATCAC[C/T]GTCTGAGGAA	93	30,34	254181	48,23	15	-0.78	.	17.17	.	.	0.46	.	.	.	1	.	5	.	3.75	.	71,1	69,2	0.027	0.041	72	71	31,0	33,0	35,1
chr1	12840318	G	A	EXON	MODIFIER	PRAMEF30P		chr1	12840318	.	G	A	.	normal_artifact	.	93	337	1	EXON(MODIFIER||||PRAMEF30P|unprocessed_pseudogene|NON_CODING|ENST00000438176|2)	TATTGAGAGA[G/A]CACTTTTTCC	93	36,26	230229	46,46	34	-9.705	.	24.15	.	.	6	.	.	.	93	.	60	.	16.31	.	152,7	155,13	0.049	0.079	159	168	73,3	69,7	77,4
chr1	12882503	G	C	INTRON	MODIFIER	PRAMEF4		chr1	12882503	.	G	C	.	normal_artifact	.	93	358	1	INTRON(MODIFIER||||PRAMEF4|protein_coding|CODING|ENST00000235349|2)	CCACATCCTG[G/C]ATAGCAGCTC	93	37,38	245223	46,40	58	-25.33	.	6.07	.	.	1.92	.	.	.	80	.	28	.	13.12	.	160,12	159,9	0.074	0.057	172	168	68,7	85,3	89,5
chr1	13318534	A	C	NON_SYNONYMOUS_CODING	MODERATE	PRAMEF15		chr1	13318534	.	A	C	.	map_qual;weak_evidence	.	93	405	1	NON_SYNONYMOUS_CODING(MODERATE|MISSENSE|Atg/Ctg|M43L|PRAMEF15|protein_coding|CODING|ENST00000376152|2)	CCCACTGTTC[A/C]TGGAGGCCTT	93	31,28	238173	42,21	18	1.31	.	47.25	.	.	6	.	.	.	1	.	8	.	3.46	.	172,2	205,6	0.014	0.03	174	211	85,0	113,2	84,2
chr1	13319384	C	T	SYNONYMOUS_CODING	LOW	PRAMEF15		chr1	13319384	.	C	T	.	normal_artifact;strand_bias	.	93	699	1	SYNONYMOUS_CODING(LOW|SILENT|ctC/ctT|L102|PRAMEF15|protein_coding|CODING|ENST00000376152|3)	GGTGGAAACT[C/T]CAAGTGCTGG	93	37,34	233254	60,33	11	-23.38	.	48.38	.	.	2.14	.	.	.	93	.	1	.	24.51	.	318,15	323,18	0.047	0.054	333	341	155,7	155,6	157,8
chr1	13342829	T	C	NON_SYNONYMOUS_CODING	MODERATE	PRAMEF14		chr1	13342829	.	T	C	.	normal_artifact;strand_bias	.	93	740	1	NON_SYNONYMOUS_CODING(MODERATE|MISSENSE|cAc/cGc|H375R|PRAMEF14|protein_coding|CODING|ENST00000334600|4)	CTGGGAGCAG[T/C]GGCTCAGGCC	93	30,38	240266	45,40	27	-54.37	.	16.1	.	.	3.65	.	.	.	93	.	1	.	34.63	.	342,23	330,18	0.065	0.052	365	348	174,12	177,8	158,11
chr1	13345313	A	C	START_LOST	HIGH	PRAMEF14		chr1	13345313	.	A	C	.	normal_artifact;strand_bias;weak_evidence	.	93	214	2	START_LOST(HIGH|MISSENSE|aTg/aGg|M1R|PRAMEF14|protein_coding|CODING|ENST00000334600|2)	CTGGATGCTC[A/C]TCCTGATAGA	93	31,36	234281	54,36	44	-5.324	.	19.38	.	.	6	.	.	.	1	.	1	.	3.3	.	104,3	98,2	0.037	0.029	107	100	42,1	42,1	59,2
chr1	13345332	A	G	UTR_5_PRIME	MODIFIER	PRAMEF14		chr1	13345332	.	A	G	.	normal_artifact;strand_bias;weak_evidence	.	93	165	2	UTR_5_PRIME(MODIFIER||18||PRAMEF14|protein_coding|CODING|ENST00000334600|2)	GATCTGCAAG[A/G]AAAATCTCTA	93	33,38	232281	56,36	45	-6.166	.	11.84	.	.	6	.	.	.	1	.	1	.	3.6	.	80,3	78,2	0.047	0.037	83	80	35,1	37,0	45,2
chr1	13592859	A	G	INTRON	MODIFIER	PDPN		chr1	13592859	.	A	G	.	weak_evidence	.	93	13	1	INTRON(MODIFIER||||PDPN|protein_coding|CODING|ENST00000294489|1)	CAAAAAGATG[A/G]TTCTTTCTTC	19	20,20	196215	60,60	41	0.951	.	2.36	.	.	6	.	.	.	1	.	32	.	3.15	.	8,0	3,2	0.101	0.428	8	5	7,0	2,0	0,0
chr1	15109425	T	C	DOWNSTREAM	MODIFIER	TMEM51-AS1		chr1	15109425	.	T	C	.	germline;weak_evidence	.	93	14	1	DOWNSTREAM(MODIFIER||2390||TMEM51-AS1|antisense|NON_CODING|ENST00000310916|)	ATGAGGAAAC[T/C]GAGGCCCAGT	2	26,20	254195	60,60	40	1.04	.	3	.	.	3.35	.	.	.	1	.	35	.	3.45	.	10,0	2,2	0.083	0.499	10	4	4,0	1,2	6,0
chr1	15112329	ATGTGTGTGTGTG	A,ATG,ATGTG,ATGTGTGTGTGTGTG	DOWNSTREAM	MODIFIER	TMEM51-AS1		chr1	15112329	.	ATGTGTGTGTGTG	A,ATG,ATGTG,ATGTGTGTGTGTGTG	.	germline;multiallelic;normal_artifact	.	93	80	1	DOWNSTREAM(MODIFIER||3622||TMEM51-AS1|antisense|NON_CODING|ENST00000404665|)	TTGTCACCAA[TGTGTGTGTGTG/-]TGTGTGTGTG	1	35,34,35,35,34	278265282276295	60,60,60,60,60	53,46,26,32	-1.025e+01,-7.134e+00,-7.143e+00,0.638	.	-2.758e+01,-2.753e+01,-2.624e+01,3.01	.	.	0.393,1.20,6.00,6.00	.	22,16,17,18,23	TG	93	STR	93	93	16.35,9.88,23.83,13.13	.	10,7,4,7,0	4,8,5,12,7	0.227,0.143,0.229,0.030	0.198,0.143,0.338,0.196	28	36	3,5,3,7,0	2,3,3,7,3	7,2,1,0,0
chr1	15383998	ATG	A,ATGTG	UTR_3_PRIME	MODIFIER	FHAD1		chr1	15383998	.	ATG	A,ATGTG	.	slippage;weak_evidence	.	93	57	1	UTR_3_PRIME(MODIFIER||855||FHAD1|protein_coding|CODING|ENST00000444385|16|WARNING_TRANSCRIPT_NO_START_CODON&INFO_REALIGN_3_PRIME)	TACATTCTCA[TG/-]TGTGTGTGTG	52	32,32,20	262246185	60,60,60	55,50	1.09,-3.470e-01	.	5.35,1.88	.	.	4.61,2.49	.	8,7,9	TG	1	STR	41	1	4.29,3.27	.	16,0,2	15,2,3	0.040,0.126	0.123,0.166	18	20	7,0,1	2,1,1	7,0,0
chr1	15438301	C	A	UPSTREAM	MODIFIER	CTRC		chr1	15438301	.	C	A	.	normal_artifact	.	93	234	1	UPSTREAM(MODIFIER||138||CTRC|protein_coding|CODING|ENST00000375949|)	GCCCTGTCTC[C/A]TGCCCAAATT	93	36,33	244251	60,60	27	-10.81	.	13.17	.	.	6	.	.	.	93	.	5	.	22.8	.	116,7	95,10	0.063	0.103	123	105	54,4	48,6	59,3
chr1	15456670	T	C	UPSTREAM	MODIFIER	CELA2A		chr1	15456670	.	T	C	.	clustered_events;haplotype;normal_artifact;strand_bias	.	93	422	3	UPSTREAM(MODIFIER||59||CELA2A|protein_coding|CODING|ENST00000359621|)	TTGCGTGCTC[T/C]TACTGTATCT	93	20,37	225229	60,39	16	-4.986	.	49.99	.	.	6	.	.	.	11	.	1	.	7.44	.	208,3	203,4	0.019	0.024	211	207	97,2	109,2	108,1
chr1	15456673	C	G	UPSTREAM	MODIFIER	CELA2A		chr1	15456673	.	C	G	.	clustered_events;haplotype;normal_artifact;strand_bias	.	93	419	3	UPSTREAM(MODIFIER||56||CELA2A|protein_coding|CODING|ENST00000359621|)	CGTGCTCTTA[C/G]TGTATCTCTC	93	20,38	225229	60,39	19	-4.996	.	49.71	.	.	6	.	.	.	11	.	1	.	7.44	.	207,3	203,4	0.019	0.024	210	207	94,2	107,2	107,1
chr1	15456694	CC	TT	UPSTREAM	MODIFIER	CELA2A		chr1	15456694	.	CC	TT	.	clustered_events;normal_artifact;strand_bias	.	93	410	3	UPSTREAM(MODIFIER||35||CELA2A|protein_coding|CODING|ENST00000359621|)	ACTGATAAGT[CC/TT]GCTCATAAAA	93	20,34	225232	60,39	37	-10.71	.	39.81	.	.	6	.	.	.	72	.	2	.	12.9	.	202,5	190,6	0.029	0.035	207	196	93,3	102,3	106,2
chr1	15518440	A	G	INTRON	MODIFIER	CASP9		chr1	15518440	.	A	G	.	PASS	.	93	274	1	INTRON(MODIFIER||||CASP9|protein_coding|CODING|ENST00000333868|1)	ACGTACTTTT[A/G]TATGGCTCTC	93	20,35	228227	60,60	37	2.08	.	35.41	.	.	6	.	.	.	93	.	93	.	76.49	.	118,0	116,33	0.008255	0.224	118	149	54,0	47,15	60,0
chr1	15604908	G	A	UPSTREAM	MODIFIER	RP4-680D5.2		chr1	15604908	.	G	A	.	PASS	.	93	166	1	UPSTREAM(MODIFIER||1282||RP4-680D5.2|antisense|NON_CODING|ENST00000428945|)	GAACCCAGCC[G/A]GCACAGCAGC	93	20,29	227272	60,58	29	1.9	.	23.01	.	.	4.61	.	.	.	7	.	7	.	5.79	.	77,0	79,4	0.012	0.057	77	83	33,0	37,0	42,0
chr1	15649843	AT	A	UPSTREAM	MODIFIER	DDI2		chr1	15649843	.	AT	A	.	normal_artifact;slippage;weak_evidence	.	93	208	1	UPSTREAM(MODIFIER||1992||DDI2|retained_intron|CODING|ENST00000548451|)	GCTTCACTTA[T/-]TTTTTTTGCA	93	20,20	229224	60,60	32	-1.419	.	15.31	.	.	6	.	8,7	T	1	STR	67	1	3.83	.	88,7	78,9	0.053	0.083	95	87	48,5	36,3	35,0
chr1	15716226	TTTTC	T	DOWNSTREAM	MODIFIER	RP11-288I21.1		chr1	15716226	.	TTTTC	T	.	normal_artifact;slippage	.	93	234	1	DOWNSTREAM(MODIFIER||4510||RP11-288I21.1|antisense|NON_CODING|ENST00000615472|)	GGTGTTTTTT[TTTC/-]TTTCAGTTGC	93	21,33	237247	60,60	39	-4.894	.	13.34	.	.	6	.	2,1	TTTC	93	STR	93	1	21.31	.	98,8	95,19	0.068	0.157	106	114	38,5	44,10	56,2
chr1	15727509	C	T	SYNONYMOUS_CODING	LOW	PLEKHM2		chr1	15727509	.	C	T	.	normal_artifact	.	93	781	1	SYNONYMOUS_CODING(LOW|SILENT|ggC/ggT|G479|PLEKHM2|protein_coding|CODING|ENST00000375799|9)	CATCAGGTGG[C/T]GGCCACCATG	93	29,20	232220	60,60	43	-42.94	.	25.45	.	.	4.61	.	.	.	93	.	93	.	61.66	.	360,32	330,39	0.081	0.105	392	369	154,18	156,15	193,13
chr1	15769188	G	A	INTRON	MODIFIER	FBLIM1		chr1	15769188	.	G	A	.	weak_evidence	.	93	16	1	INTRON(MODIFIER||||FBLIM1|protein_coding|CODING|ENST00000441801|4)	AATATAAAGT[G/A]GCTCCTGGCT	28	36,20	240224	60,60	38	1.08	.	3.3	.	.	6	.	.	.	1	.	32	.	3.15	.	11,0	3,2	0.077	0.427	11	5	2,0	0,0	9,0
chr1	15807310	G	A	UTR_3_PRIME	MODIFIER	UQCRHL		chr1	15807310	.	G	A	.	weak_evidence	.	93	68	1	UTR_3_PRIME(MODIFIER||64||UQCRHL|protein_coding|CODING|ENST00000483273|1)	TGGTACATCC[G/A]AAACCATAAG	93	30,34	262315	60,38	45	1.51	.	8.93	.	.	4.61	.	.	.	1	.	6	.	3.39	.	30,0	31,2	0.03	0.085	30	33	15,0	10,1	13,0
chr1	15807417	T	C	NON_SYNONYMOUS_CODING	MODERATE	UQCRHL		chr1	15807417	.	T	C	.	clustered_events;haplotype	.	93	270	4	NON_SYNONYMOUS_CODING(MODERATE|MISSENSE|aAg/aGg|K78R|UQCRHL|protein_coding|CODING|ENST00000483273|1)	GCAATGGTCC[T/C]TTGCATGCAA	93	36,29	246271	60,50	60	2.15	.	42.14	.	.	4.61	.	.	.	7	.	15	.	6.1	.	140,0	126,4	0.007042	0.034	140	130	67,0	62,1	71,0
chr1	15807419	T	C	SYNONYMOUS_CODING	LOW	UQCRHL		chr1	15807419	.	T	C	.	clustered_events;haplotype	.	93	275	4	SYNONYMOUS_CODING(LOW|SILENT|gcA/gcG|A77|UQCRHL|protein_coding|CODING|ENST00000483273|1)	AATGGTCCTT[T/C]GCATGCAAGA	93	33,30	246271	60,50	65	2.15	.	42.14	.	.	4.61	.	.	.	7	.	15	.	6.1	.	140,0	126,4	0.006979	0.034	140	130	66,0	65,1	72,0
chr1	15807483	T	C	NON_SYNONYMOUS_CODING	MODERATE	UQCRHL		chr1	15807483	.	T	C	.	clustered_events;haplotype	.	93	470	4	NON_SYNONYMOUS_CODING(MODERATE|MISSENSE|cAt/cGt|H56R|UQCRHL|protein_coding|CODING|ENST00000483273|1)	AGAGGATACA[T/C]GCTCATCATA	93	31,30	241274	60,60	16	2.38	.	72.53	.	.	6	.	.	.	4	.	13	.	6.6	.	241,0	223,4	0.004108	0.022	241	227	111,0	112,2	123,0
chr1	15807492	T	C	NON_SYNONYMOUS_CODING	MODERATE	UQCRHL		chr1	15807492	.	T	C	.	clustered_events;haplotype;weak_evidence	.	93	505	4	NON_SYNONYMOUS_CODING(MODERATE|MISSENSE|tAt/tGt|Y53C|UQCRHL|protein_coding|CODING|ENST00000483273|1)	ATGCTCATCA[T/C]AGAGCTCTAG	93	31,36	240321	60,60	18	2.4	.	74.04	.	.	0.762	.	.	.	1	.	9	.	4.76	.	246,0	237,3	0.003971	0.016	246	240	113,0	110,2	121,0
chr1	15828362	T	C	EXON	MODIFIER	RP11-169K16.8		chr1	15828362	.	T	C	.	clustered_events;haplotype	.	93	38	9	EXON(MODIFIER||||RP11-169K16.8|processed_pseudogene|NON_CODING|ENST00000321418|1)	ATGATTGAGC[T/C]GCGCATGCTA	10	34,20	250249	60,49	27	1.08	.	3.31	.	.	4.57	.	.	.	93	.	93	.	75.74	.	11,0	6,20	0.077	0.75	11	26	3,0	3,12	5,0
chr1	15828368	T	C	EXON	MODIFIER	RP11-169K16.8		chr1	15828368	.	T	C	.	clustered_events;haplotype	.	93	35	9	EXON(MODIFIER||||RP11-169K16.8|processed_pseudogene|NON_CODING|ENST00000321418|1)	GAGCTGCGCA[T/C]GCTACAATAC	8	32,20	250248	60,48	32	1.08	.	3.31	.	.	4.57	.	.	.	93	.	93	.	71.09	.	11,0	6,18	0.077	0.731	11	24	5,0	3,10	5,0
chr1	15828375	A	G	EXON	MODIFIER	RP11-169K16.8		chr1	15828375	.	A	G	.	clustered_events;haplotype	.	93	33	9	EXON(MODIFIER||||RP11-169K16.8|processed_pseudogene|NON_CODING|ENST00000321418|1)	GCATGCTACA[A/G]TACAAGCTGC	5	34,34	249249	60,45	46	1.08	.	3.31	.	.	4.57	.	.	.	93	.	93	.	59.83	.	11,0	7,15	0.077	0.667	11	22	6,0	2,8	5,0
chr1	15828417	G	A	EXON	MODIFIER	RP11-169K16.8		chr1	15828417	.	G	A	.	clustered_events	.	93	38	9	EXON(MODIFIER||||RP11-169K16.8|processed_pseudogene|NON_CODING|ENST00000321418|1)	GCAAGGAGCG[G/A]TTTGCTGGTG	45	37,31	255249	60,43	60	1.32	.	5.97	.	.	6	.	.	.	93	.	15	.	35.83	.	20,0	7,11	0.046	0.6	20	18	9,0	3,8	10,0
chr1	15828429	G	A	EXON	MODIFIER	RP11-169K16.8		chr1	15828429	.	G	A	.	clustered_events;haplotype	.	93	34	9	EXON(MODIFIER||||RP11-169K16.8|processed_pseudogene|NON_CODING|ENST00000321418|1)	TTGCTGGTGT[G/A]GACATCTGTG	28	37,37	249250	60,43	49	1.3	.	5.72	.	.	4.57	.	.	.	93	.	19	.	40.32	.	19,0	5,10	0.048	0.647	19	15	10,0	2,7	8,0
chr1	15828436	T	C	EXON	MODIFIER	RP11-169K16.8		chr1	15828436	.	T	C	.	clustered_events;haplotype	.	93	38	9	EXON(MODIFIER||||RP11-169K16.8|processed_pseudogene|NON_CODING|ENST00000321418|1)	TGTGGACATC[T/C]GTGTCCGTAT	34	37,29	231250	60,43	42	1.34	.	6.32	.	.	4.57	.	.	.	93	.	17	.	39.46	.	21,0	7,10	0.043	0.579	21	17	9,0	2,7	10,0
chr1	15828445	A	G	EXON	MODIFIER	RP11-169K16.8		chr1	15828445	.	A	G	.	clustered_events;haplotype	.	93	39	9	EXON(MODIFIER||||RP11-169K16.8|processed_pseudogene|NON_CODING|ENST00000321418|1)	CTGTGTCCGT[A/G]TGAAGGGTGG	38	30,35	231251	60,43	33	1.36	.	6.62	.	.	4.57	.	.	.	93	.	12	.	34.86	.	22,0	8,9	0.042	0.526	22	17	10,0	3,6	10,0
chr1	15828447	G	A	EXON	MODIFIER	RP11-169K16.8		chr1	15828447	.	G	A	.	clustered_events;haplotype	.	93	40	9	EXON(MODIFIER||||RP11-169K16.8|processed_pseudogene|NON_CODING|ENST00000321418|1)	GTGTCCGTAT[G/A]AAGGGTGGTG	38	32,33	231251	60,43	31	1.37	.	6.62	.	.	4.57	.	.	.	93	.	12	.	34.86	.	22,0	8,9	0.041	0.526	22	17	9,0	3,6	12,0
chr1	15828485	A	G	EXON	MODIFIER	RP11-169K16.8		chr1	15828485	.	A	G	.	clustered_events	.	93	42	9	EXON(MODIFIER||||RP11-169K16.8|processed_pseudogene|NON_CODING|ENST00000321418|1)	TATGCTATCC[A/G]TCAGTCCATC	69	21,26	238240	60,42	3	1.43	.	7.71	.	.	4.27	.	.	.	5	.	5	.	5.73	.	26,0	12,3	0.036	0.234	26	15	11,0	4,3	13,0
chr1	15841737	G	A	INTRON	MODIFIER	FLJ37453		chr1	15841737	.	G	A	.	weak_evidence	.	93	13	1	INTRON(MODIFIER||||FLJ37453|antisense|NON_CODING|ENST00000317122|1)	GTAGAGACGG[G/A]GTTTCACTAT	20	20,26	210132	60,51	53	0.999	.	2.7	.	.	6	.	.	.	1	.	35	.	4.29	.	9,0	2,2	0.091	0.499	9	4	5,0	1,0	4,0
chr1	16001505	GA	G	UPSTREAM	MODIFIER	C1orf64		chr1	16001505	.	GA	G	.	germline;slippage;weak_evidence	.	93	22	1	UPSTREAM(MODIFIER||2730||C1orf64|protein_coding|CODING|ENST00000329454|)	CGTCTCAAAG[A/-]AAAAAAAAAA	1	20,20	234209	60,60	63	0.978	.	2.21	.	.	2.98	.	11,10	A	1	STR	73	1	3.43	.	8,0	6,5	0.097	0.458	8	11	3,0	3,0	5,0
chr1	16039589	T	A	UPSTREAM	MODIFIER	CLCNKB		chr1	16039589	.	T	A	.	haplotype;map_qual	.	93	43	2	UPSTREAM(MODIFIER||4188||CLCNKB|protein_coding|CODING|ENST00000375679|)	AGGAGAGTTG[T/A]GGCCAGAACC	37	20,20	229167	60,27	27	1.28	.	5.41	.	.	1.08	.	.	.	15	.	20	.	6.71	.	18,0	22,3	0.05	0.147	18	25	6,0	8,1	12,0
chr1	16039611	A	G	UPSTREAM	MODIFIER	CLCNKB		chr1	16039611	.	A	G	.	haplotype;map_qual;strand_bias;weak_evidence	.	93	50	2	UPSTREAM(MODIFIER||4166||CLCNKB|protein_coding|CODING|ENST00000375679|)	ACCCACAAGG[A/G]ACGAGGTGGC	63	20,37	227225	60,27	14	1.3	.	5.72	.	.	1.21	.	.	.	2	.	3	.	4.86	.	19,0	28,2	0.048	0.093	19	30	5,0	10,1	13,0
chr1	16062713	A	T	INTRON	MODIFIER	FAM131C		chr1	16062713	.	A	T	.	weak_evidence	.	93	21	1	INTRON(MODIFIER||||FAM131C|protein_coding|CODING|ENST00000375662|2)	AGGAAGAAGG[A/T]GGGGGCAACA	35	20,33	237234	60,46	40	0.999	.	2.7	.	.	6	.	.	.	1	.	24	.	4.42	.	9,0	9,2	0.091	0.229	9	11	3,0	2,0	6,0
chr1	16407748	G	T	INTRON	MODIFIER	SPATA21		chr1	16407748	.	G	T	.	weak_evidence	.	93	10	1	INTRON(MODIFIER||||SPATA21|protein_coding|CODING|ENST00000335496|7)	GTGAACCACT[G/T]CTCCCGGTTG	20	20,34	211363	60,60	65	0.954	.	2.4	.	.	6	.	.	.	1	.	15	.	3.1	.	8,0	1,1	0.1	0.5	8	2	2,0	0,1	6,0
chr1	16421327	GCA	G	DOWNSTREAM	MODIFIER	SPATA21		chr1	16421327	.	GCA	G	.	normal_artifact;slippage;weak_evidence	.	93	231	1	DOWNSTREAM(MODIFIER||3576||SPATA21|protein_coding|CODING|ENST00000375577|)	CAGGCACAGG[CA/-]CACACACACA	93	37,37	246245	60,60	9	-0.8248	.	22.74	.	.	6	.	6,5	CA	1	STR	3	1	6.69	.	99,3	112,4	0.033	0.042	102	116	45,1	49,1	47,2
chr1	16535646	C	G	UPSTREAM	MODIFIER	RNU1-6P		chr1	16535646	.	C	G	.	germline;weak_evidence	.	93	19	2	UPSTREAM(MODIFIER||1422||RNU1-6P|snRNA|NON_CODING|ENST00000516290|)	GTCGGTCGTG[C/G]GTCGCCAGGT	1	37,33	288306	60,45	2	0.954	.	2.41	.	.	0.308	.	.	.	1	.	7	.	3.83	.	8,0	9,2	0.1	0.231	8	11	4,0	4,2	4,0
chr1	16535691	G	A	UPSTREAM	MODIFIER	RP5-875O13.1		chr1	16535691	.	G	A	.	normal_artifact;weak_evidence	.	93	52	2	UPSTREAM(MODIFIER||42||RP5-875O13.1|lincRNA|NON_CODING|ENST00000415386|)	GGAGGAGGCG[G/A]GAGCGCGGAG	26	37,33	294306	60,55	5	-0.4028	.	4.04	.	.	0.379	.	.	.	1	.	6	.	3.24	.	23,1	24,2	0.077	0.106	24	26	11,0	12,0	12,1
chr1	16536857	C	T	UPSTREAM	MODIFIER	RP5-875O13.1		chr1	16536857	.	C	T	.	map_qual;normal_artifact;strand_bias	.	93	772	1	UPSTREAM(MODIFIER||1208||RP5-875O13.1|lincRNA|NON_CODING|ENST00000415386|)	GTTGGGTAGG[C/T]GGAAGAGAGA	93	20,31	228204	60,27	26	-1.114	.	85.14	.	.	0.37	.	.	.	16	.	1	.	8.28	.	321,4	414,10	0.014	0.023	325	424	161,1	197,5	147,3
chr1	16565360	G	A	INTRON	MODIFIER	NBPF1		chr1	16565360	.	G	A	.	clustered_events;map_qual;weak_evidence	.	93	40	3	INTRON(MODIFIER||||NBPF1|protein_coding|CODING|ENST00000430580|27)	ATAGTTCTCT[G/A]AATTTGTCAC	29	38,32	306240	25,24	39	1.19	.	4.21	.	.	1.96	.	.	.	1	.	8	.	3.89	.	14,0	20,3	0.061	0.158	14	23	8,0	3,2	6,0
chr1	16565410	G	A	INTRON	MODIFIER	NBPF1		chr1	16565410	.	G	A	.	clustered_events;normal_artifact	.	93	176	3	INTRON(MODIFIER||||NBPF1|protein_coding|CODING|ENST00000430580|27)	GAATCAGAGT[G/A]CCACAGGCAT	93	38,31	283283	27,37	22	-3.094	.	11.87	.	.	1.64	.	.	.	24	.	5	.	7.57	.	69,3	82,5	0.053	0.067	72	87	38,0	41,2	30,3
chr1	16565468	T	A	INTRON	MODIFIER	NBPF1		chr1	16565468	.	T	A	.	clustered_events;map_qual;normal_artifact	.	93	574	3	INTRON(MODIFIER||||NBPF1|protein_coding|CODING|ENST00000430580|27)	ATCCCATGTC[T/A]GGGCTTCCAG	93	37,33	262264	27,27	31	-38.77	.	3.72	.	.	0.456	.	.	.	93	.	62	.	37.15	.	240,25	257,24	0.096	0.087	265	281	117,15	133,14	123,10
chr1	16565570	G	A	INTRON	MODIFIER	NBPF1		chr1	16565570	.	G	A	.	map_qual;normal_artifact	.	93	1382	1	INTRON(MODIFIER||||NBPF1|protein_coding|CODING|ENST00000430580|27)	ACTTGGAGCA[G/A]GAATATGATC	93	20,20	241239	27,27	46	-56.71	.	65.31	.	.	1.74	.	.	.	93	.	93	.	84.1	.	608,48	630,70	0.069	0.099	656	700	300,16	293,46	296,28
chr1	16565761	T	A,C	NON_SYNONYMOUS_CODING	MODERATE	NBPF1		chr1	16565761	.	T	A,C	.	map_qual;multiallelic;normal_artifact	.	93	205	1	NON_SYNONYMOUS_CODING(MODERATE|MISSENSE|cAg/cTg|Q979L|NBPF1|protein_coding|CODING|ENST00000430580|27)	CAGTGAGTCC[T/A]GCAAGACTTC	61	33,37,30	297286305	27,27,27	13,26	-3.850e+00,-1.503e+01	.	15.72,-3.859e-01	.	.	1.41,2.01	.	.	.	93	.	10	.	5.99,23.79	.	89,4,10	72,5,13	0.046,0.103	0.063,0.150	103	90	39,1,6	36,1,5	49,3,4
chr1	16566994	C	T	INTRON	MODIFIER	NBPF1		chr1	16566994	.	C	T	.	map_qual;normal_artifact;weak_evidence	.	93	94	1	INTRON(MODIFIER||||NBPF1|protein_coding|CODING|ENST00000430580|25)	GAGAGCCCTG[C/T]TCACTGACCC	86	37,32	276317	27,27	60	-3.846	.	3.1	.	.	1.68	.	.	.	1	.	4	.	3.5	.	39,3	48,3	0.09	0.075	42	51	24,1	29,2	15,2
chr1	16574684	G	T	NON_SYNONYMOUS_CODING	MODERATE	NBPF1		chr1	16574684	.	G	T	.	normal_artifact;strand_bias;weak_evidence	.	93	436	1	NON_SYNONYMOUS_CODING(MODERATE|MISSENSE|cCg/cAg|P734Q|NBPF1|protein_coding|CODING|ENST00000430580|21)	TTCAGCCTTC[G/T]GCATCTCCCT	93	35,36	233316	27,40	9	-14.48	.	31.65	.	.	0.551	.	.	.	1	.	1	.	3.83	.	200,8	220,3	0.043	0.018	208	223	83,6	106,1	108,2
chr1	16576328	G	C	SYNONYMOUS_CODING	LOW	NBPF1		chr1	16576328	.	G	C	.	map_qual;normal_artifact	.	93	1156	1	SYNONYMOUS_CODING(LOW|SILENT|ctC/ctG|L686|NBPF1|protein_coding|CODING|ENST00000430580|19)	GCTGTTCTTG[G/C]AGGTCCTGCC	93	20,37	239238	34,22	18	-51.12	.	51.39	.	.	0.851	.	.	.	93	.	38	.	51.11	.	519,42	528,44	0.074	0.076	561	572	262,29	260,20	249,12
chr1	16576448	T	C	SYNONYMOUS_CODING	LOW	NBPF1		chr1	16576448	.	T	C	.	clustered_events;normal_artifact	.	93	1051	4	SYNONYMOUS_CODING(LOW|SILENT|cgA/cgG|R646|NBPF1|protein_coding|CODING|ENST00000430580|19)	GGGTCAGCTC[T/C]CGTTCCTGAG	93	34,37	246273	40,31	37	-80.1	.	8.02	.	.	0.423	.	.	.	93	.	93	.	71.49	.	477,53	432,53	0.086	0.092	530	485	221,27	212,25	254,26
chr1	16576487	G	T	INTRON	MODIFIER	NBPF1		chr1	16576487	.	G	T	.	clustered_events;normal_artifact;weak_evidence	.	93	1003	4	INTRON(MODIFIER||||NBPF1|protein_coding|CODING|ENST00000430580|18)	ATTGCCTAAG[G/T]TGAGACGGTA	93	35,31	241237	40,43	10	0.491	.	135.2	.	.	0.714	.	.	.	1	.	13	.	5.66	.	491,5	465,11	0.008105	0.022	496	476	214,1	233,6	265,4
chr1	16576613	A	T	INTRON	MODIFIER	NBPF1		chr1	16576613	.	A	T	.	clustered_events;haplotype;normal_artifact	.	93	482	4	INTRON(MODIFIER||||NBPF1|protein_coding|CODING|ENST00000430580|18)	TGTTGGAAGG[A/T]ATGTCTGTGG	93	34,31	248233	57,34	36	-11.27	.	43.8	.	.	1.42	.	.	.	54	.	17	.	10.62	.	232,8	219,10	0.036	0.04	240	229	101,7	106,4	128,1
chr1	16576625	T	C	INTRON	MODIFIER	NBPF1		chr1	16576625	.	T	C	.	clustered_events;haplotype;map_qual;normal_artifact	.	93	409	4	INTRON(MODIFIER||||NBPF1|protein_coding|CODING|ENST00000430580|18)	TGTCTGTGGC[T/C]AAGAGAAAGA	93	31,38	253234	60,29	25	-11.73	.	35.96	.	.	1.43	.	.	.	59	.	20	.	11.07	.	205,8	187,9	0.041	0.045	213	196	88,7	85,3	105,1
chr1	16577241	AG	CT	INTRON	MODIFIER	NBPF1		chr1	16577241	.	AG	CT	.	clustered_events;haplotype;normal_artifact	.	93	657	5	INTRON(MODIFIER||||NBPF1|protein_coding|CODING|ENST00000430580|18)	TTAGTTCTTA[AG/CT]TCTCCCCACT	93	34,35	237253	48,37	56	-50	.	9	.	.	6	.	.	.	93	.	54	.	45.25	.	281,18	341,17	0.063	0.05	299	358	134,9	161,5	125,7
chr1	16577252	T	C	INTRON	MODIFIER	NBPF1		chr1	16577252	.	T	C	.	clustered_events;haplotype;normal_artifact	.	93	750	5	INTRON(MODIFIER||||NBPF1|protein_coding|CODING|ENST00000430580|18)	GTCTCCCCAC[T/C]GAGCTGCTGT	93	37,30	236249	48,33	50	-39.23	.	35.13	.	.	1.09	.	.	.	93	.	28	.	37.81	.	326,15	394,15	0.047	0.039	341	409	159,8	180,5	144,6
chr1	16577259	C	T	INTRON	MODIFIER	NBPF1		chr1	16577259	.	C	T	.	clustered_events;haplotype;normal_artifact	.	93	798	5	INTRON(MODIFIER||||NBPF1|protein_coding|CODING|ENST00000430580|18)	CACTGAGCTG[C/T]TGTACTTCAG	93	37,30	235254	48,33	46	-39.29	.	39.66	.	.	1.4	.	.	.	93	.	20	.	34.5	.	346,16	409,14	0.046	0.035	362	423	171,10	194,5	166,6
chr1	16577303	T	C	INTRON	MODIFIER	NBPF1		chr1	16577303	.	T	C	.	clustered_events;map_qual;normal_artifact;strand_bias	.	93	955	5	INTRON(MODIFIER||||NBPF1|protein_coding|CODING|ENST00000430580|18)	CCTGCCCCCA[T/C]GGGGTCCCCT	93	20,29	230255	40,24	29	-53.85	.	42.08	.	.	1.64	.	.	.	93	.	1	.	31.98	.	426,22	489,14	0.05	0.029	448	503	203,11	211,6	172,11
chr1	16577308	T	C	INTRON	MODIFIER	NBPF1		chr1	16577308	.	T	C	.	clustered_events;map_qual;normal_artifact;strand_bias	.	93	965	5	INTRON(MODIFIER||||NBPF1|protein_coding|CODING|ENST00000430580|18)	CCCCATGGGG[T/C]CCCCTCACCT	93	20,37	230255	40,24	34	-52.34	.	44.58	.	.	1.62	.	.	.	93	.	1	.	31.01	.	428,21	490,14	0.048	0.029	449	504	219,10	228,5	199,10
chr1	16580670	G	A	INTRON	MODIFIER	NBPF1		chr1	16580670	.	G	A	.	map_qual;normal_artifact	.	93	459	1	INTRON(MODIFIER||||NBPF1|protein_coding|CODING|ENST00000430580|16)	CAATATGTGC[G/A]TATACAGCCT	93	29,33	248237	40,26	5	-20.62	.	16.07	.	.	0.604	.	.	.	93	.	13	.	14.41	.	192,16	195,12	0.078	0.061	208	207	86,5	91,7	95,10
chr1	16580808	C	T	NON_SYNONYMOUS_CODING	MODERATE	NBPF1		chr1	16580808	.	C	T	.	haplotype;map_qual;normal_artifact;strand_bias	.	93	1285	2	NON_SYNONYMOUS_CODING(MODERATE|MISSENSE|Gct/Act|A510T|NBPF1|protein_coding|CODING|ENST00000430580|16)	ACAACCAGAG[C/T]TGAGTTGACT	93	20,31	234207	46,25	47	-10.01	.	157.17	.	.	1.02	.	.	.	11	.	1	.	7.7	.	615,8	651,7	0.014	0.011	623	658	264,2	342,3	330,3
chr1	16580812	G	A	SYNONYMOUS_CODING	LOW	NBPF1		chr1	16580812	.	G	A	.	haplotype;map_qual;normal_artifact;strand_bias	.	93	1293	2	SYNONYMOUS_CODING(LOW|SILENT|aaC/aaT|N508|NBPF1|protein_coding|CODING|ENST00000430580|16)	CCAGAGCTGA[G/A]TTGACTTTGT	93	20,34	234214	46,25	10	-12.31	.	151.27	.	.	6	.	.	.	21	.	1	.	8.75	.	613,10	655,8	0.017	0.013	623	663	259,4	343,5	333,6
chr1	16580971	G	A	INTRON	MODIFIER	NBPF1		chr1	16580971	.	G	A	.	map_qual;normal_artifact;weak_evidence	.	93	220	1	INTRON(MODIFIER||||NBPF1|protein_coding|CODING|ENST00000430580|15)	TGAGCCAGGT[G/A]GGACAGAGAT	93	36,38	272321	40,25	21	-1.814	.	23.29	.	.	0.607	.	.	.	1	.	5	.	3.27	.	105,3	99,4	0.036	0.047	108	103	44,1	54,0	60,2
chr1	16581396	T	C	INTRON	MODIFIER	NBPF1		chr1	16581396	.	T	C	.	map_qual;normal_artifact;strand_bias	.	93	1071	1	INTRON(MODIFIER||||NBPF1|protein_coding|CODING|ENST00000430580|15)	CACCCATTAC[T/C]TGCTCCTGAG	93	33,36	235306	45,25	49	-10.72	.	111.88	.	.	1.4	.	.	.	5	.	1	.	7.09	.	483,12	561,10	0.025	0.018	495	571	216,6	282,6	236,6
chr1	16581539	C	G	INTRON	MODIFIER	NBPF1		chr1	16581539	.	C	G	.	map_qual;normal_artifact;strand_bias	.	93	1479	1	INTRON(MODIFIER||||NBPF1|protein_coding|CODING|ENST00000430580|14)	TTCCCATTCT[C/G]CAAGCACAGT	93	20,38	228243	48,25	42	-16.57	.	157.92	.	.	0.583	.	.	.	8	.	1	.	7.5	.	691,22	739,13	0.025	0.017	713	752	321,7	348,10	346,15
chr1	16581642	A	G	INTRON	MODIFIER	NBPF1		chr1	16581642	.	A	G	.	clustered_events;map_qual;normal_artifact	.	93	697	3	INTRON(MODIFIER||||NBPF1|protein_coding|CODING|ENST00000430580|14)	ATGCCCTGGC[A/G]TGGTTTCCTG	93	31,34	258248	60,25	56	-30.08	.	35.99	.	.	1.11	.	.	.	93	.	82	.	24.71	.	333,26	297,22	0.073	0.07	359	319	161,9	142,15	166,17
chr1	16581686	C	T	INTRON	MODIFIER	NBPF1		chr1	16581686	.	C	T	.	clustered_events;map_qual;normal_artifact;weak_evidence	.	93	379	3	INTRON(MODIFIER||||NBPF1|protein_coding|CODING|ENST00000430580|14)	ATCTGGAGGG[C/T]CACCATCAAG	93	38,34	277247	60,25	48	-21.91	.	13.97	.	.	0.654	.	.	.	1	.	5	.	3.41	.	189,16	158,5	0.081	0.035	205	163	81,8	83,2	103,8
chr1	16581728	T	A	INTRON	MODIFIER	NBPF1		chr1	16581728	.	T	A	.	clustered_events;normal_artifact;weak_evidence	.	93	164	3	INTRON(MODIFIER||||NBPF1|protein_coding|CODING|ENST00000430580|14)	ACCTTTTGCT[T/A]CCCATATCAC	93	34,31	283247	60,35	20	-0.1581	.	20.83	.	.	6	.	.	.	1	.	21	.	4.45	.	86,2	68,4	0.032	0.066	88	72	38,1	33,3	48,1
chr1	16582364	A	T	INTRON	MODIFIER	NBPF1		chr1	16582364	.	A	T	.	germline;haplotype	.	93	35	2	INTRON(MODIFIER||||NBPF1|protein_coding|CODING|ENST00000430580|14)	CAATACTGTG[A/T]CCTCCAACCC	1	33,31	297239	48,44	34	1.18	.	4.21	.	.	0.622	.	.	.	93	.	35	.	15.35	.	14,0	15,6	0.063	0.3	14	21	6,0	6,2	6,0
chr1	16582369	C	A	INTRON	MODIFIER	NBPF1		chr1	16582369	.	C	A	.	germline;haplotype	.	93	39	2	INTRON(MODIFIER||||NBPF1|protein_coding|CODING|ENST00000430580|14)	CTGTGACCTC[C/A]AACCCCATGG	1	36,33	295239	48,44	39	1.2	.	4.52	.	.	0.652	.	.	.	93	.	35	.	15.33	.	15,0	15,6	0.059	0.299	15	21	6,0	7,2	9,0
chr1	16582725	T	C	NON_SYNONYMOUS_CODING	MODERATE	NBPF1		chr1	16582725	.	T	C	.	normal_artifact;strand_bias	.	93	53	1	NON_SYNONYMOUS_CODING(MODERATE|MISSENSE|gAg/gGg|E70G|NBPF1|nonsense_mediated_decay|CODING|ENST00000392963|5)	GGGTCAGCTC[T/C]CGTTCCTGAG	16	37,34	304346	24,40	2	-0.8291	.	3.33	.	.	0.333	.	.	.	10	.	1	.	6.19	.	22,1	26,3	0.079	0.129	23	29	12,0	13,2	10,1
chr1	16583512	C	T	INTRON	MODIFIER	NBPF1		chr1	16583512	.	C	T	.	clustered_events;haplotype;map_qual;normal_artifact	.	93	475	4	INTRON(MODIFIER||||NBPF1|protein_coding|CODING|ENST00000430580|13)	CCCAGCTTAG[C/T]TCTTACGTCT	93	38,31	254220	40,25	43	-4.735	.	59.94	.	.	2.08	.	.	.	73	.	4	.	13.34	.	241,3	225,6	0.016	0.03	244	231	113,3	116,1	118,0
chr1	16583518	C	A	INTRON	MODIFIER	NBPF1		chr1	16583518	.	C	A	.	clustered_events;haplotype;map_qual;normal_artifact	.	93	522	4	INTRON(MODIFIER||||NBPF1|protein_coding|CODING|ENST00000430580|13)	TTAGCTCTTA[C/A]GTCTCCCCAC	93	36,35	253225	40,25	42	-7.284	.	61.47	.	.	2.32	.	.	.	93	.	3	.	21.68	.	260,4	249,9	0.019	0.038	264	258	122,4	119,3	127,0
chr1	16583529	C	T	INTRON	MODIFIER	NBPF1		chr1	16583529	.	C	T	.	clustered_events;haplotype;normal_artifact;strand_bias	.	93	639	4	INTRON(MODIFIER||||NBPF1|protein_coding|CODING|ENST00000430580|13)	GTCTCCCCAC[C/T]GAGCTGCTGT	93	36,38	249226	40,40	14	-10.96	.	65.69	.	.	2.08	.	.	.	93	.	1	.	33.43	.	297,6	292,14	0.023	0.049	303	306	144,6	145,6	148,0
chr1	16583568	CA	TG	INTRON	MODIFIER	NBPF1		chr1	16583568	.	CA	TG	.	clustered_events;map_qual;normal_artifact;strand_bias	.	93	1010	4	INTRON(MODIFIER||||NBPF1|protein_coding|CODING|ENST00000430580|13)	GCTGCTCCCC[CA/TG]CCTGCCCCCA	93	29,37	239272	47,27	46	-47.44	.	47.18	.	.	6	.	.	.	93	.	1	.	47.06	.	443,27	473,32	0.059	0.063	470	505	223,17	260,15	206,10
chr1	16585601	G	A	SYNONYMOUS_CODING	LOW	NBPF1		chr1	16585601	.	G	A	.	clustered_events;haplotype;normal_artifact	.	93	172	3	SYNONYMOUS_CODING(LOW|SILENT|aaC/aaT|N292|NBPF1|protein_coding|CODING|ENST00000430580|12)	GCAATTTCTC[G/A]TTGATTTCTA	93	30,33	276221	40,37	7	-6.722	.	9.93	.	.	0.879	.	.	.	10	.	4	.	6.42	.	75,3	90,3	0.05	0.042	78	93	34,2	47,2	36,0
chr1	16585604	G	C	NON_SYNONYMOUS_CODING	MODERATE	NBPF1		chr1	16585604	.	G	C	.	clustered_events;haplotype;normal_artifact	.	93	174	3	NON_SYNONYMOUS_CODING(MODERATE|MISSENSE|atC/atG|I291M|NBPF1|protein_coding|CODING|ENST00000430580|12)	ATTTCTCGTT[G/C]ATTTCTAGAA	93	38,38	276221	40,37	10	-6.716	.	9.93	.	.	0.903	.	.	.	10	.	4	.	6.42	.	75,3	90,3	0.05	0.042	78	93	35,3	50,1	38,0
chr1	16585643	A	G	SYNONYMOUS_CODING	LOW	NBPF1		chr1	16585643	.	A	G	.	clustered_events;map_qual;normal_artifact;weak_evidence	.	93	210	3	SYNONYMOUS_CODING(LOW|SILENT|ccT/ccC|P278|NBPF1|protein_coding|CODING|ENST00000430580|12)	CGCTGGACAA[A/G]GGGCCGGCTG	93	34,20	255274	27,27	13	-3.774	.	12.53	.	.	2.59	.	.	.	1	.	14	.	3.82	.	84,6	108,7	0.071	0.053	90	115	38,3	60,3	43,3
chr1	16587576	G	A	INTRON	MODIFIER	NBPF1		chr1	16587576	.	G	A	.	normal_artifact	.	93	368	1	INTRON(MODIFIER||||NBPF1|protein_coding|CODING|ENST00000430580|10)	GACAGCTGCC[G/A]CACCCTGTGT	93	30,33	260307	40,31	6	-8.304	.	31.76	.	.	2.11	.	.	.	46	.	4	.	9.84	.	170,6	163,8	0.039	0.051	176	171	84,3	74,3	83,3
chr1	16587700	C	T	INTRON	MODIFIER	NBPF1		chr1	16587700	.	C	T	.	clustered_events;haplotype;normal_artifact;strand_bias	.	93	1445	4	INTRON(MODIFIER||||NBPF1|protein_coding|CODING|ENST00000430580|10)	CCACCCATTA[C/T]TTGCTCCCGA	93	35,34	236251	46,33	48	-98.38	.	47.71	.	.	2.21	.	.	.	93	.	1	.	147.28	.	671,40	677,53	0.056	0.073	711	730	323,19	346,28	320,19
chr1	16587701	T	C	INTRON	MODIFIER	NBPF1		chr1	16587701	.	T	C	.	clustered_events;map_qual;normal_artifact	.	93	1467	4	INTRON(MODIFIER||||NBPF1|protein_coding|CODING|ENST00000430580|10)	CACCCATTAC[T/C]TGCTCCCGAG	93	34,20	237236	47,25	26	-60.59	.	69.91	.	.	0.951	.	.	.	93	.	93	.	79.53	.	659,53	655,69	0.073	0.093	712	724	317,28	325,43	315,24
chr1	16587708	C	T	INTRON	MODIFIER	NBPF1		chr1	16587708	.	C	T	.	clustered_events;haplotype;map_qual;normal_artifact;strand_bias	.	93	1540	4	INTRON(MODIFIER||||NBPF1|protein_coding|CODING|ENST00000430580|10)	TACTTGCTCC[C/T]GAGTATTCAG	93	21,33	236252	47,27	52	-94.16	.	67.84	.	.	1.28	.	.	.	93	.	1	.	144.02	.	717,36	721,51	0.049	0.067	753	772	337,18	369,25	348,16
chr1	16587844	G	C	INTRON	MODIFIER	NBPF1		chr1	16587844	.	G	C	.	clustered_events;map_qual;normal_artifact;strand_bias	.	93	1364	4	INTRON(MODIFIER||||NBPF1|protein_coding|CODING|ENST00000430580|9)	TTCACATTCT[G/C]CAAGCACAGT	93	20,37	232222	48,27	32	-13.57	.	146.3	.	.	1.25	.	.	.	93	.	1	.	20.69	.	622,15	671,25	0.022	0.03	637	696	312,8	366,14	296,7
chr1	16587991	C	T	INTRON	MODIFIER	NBPF1		chr1	16587991	.	C	T	.	normal_artifact	.	93	120	1	INTRON(MODIFIER||||NBPF1|protein_coding|CODING|ENST00000430580|9)	ATCTGGAGGG[C/T]CACCATCAAG	93	38,34	262278	60,33	32	-1.834	.	8.65	.	.	0.625	.	.	.	10	.	6	.	6.13	.	49,2	59,4	0.056	0.076	51	63	21,1	23,1	27,1
chr1	16589116	T	C	DOWNSTREAM	MODIFIER	NBPF1		chr1	16589116	.	T	C	.	map_qual;normal_artifact;weak_evidence	.	93	298	1	DOWNSTREAM(MODIFIER||4446||NBPF1|processed_transcript|CODING|ENST00000420513|)	GAGTGATCCG[T/C]TCAAATATTG	93	20,37	250302	22,22	28	-15.7	.	10.67	.	.	0.332	.	.	.	1	.	9	.	4.42	.	146,14	130,6	0.091	0.049	160	136	79,6	52,4	65,8
chr1	16589717	C	T	DOWNSTREAM	MODIFIER	NBPF1		chr1	16589717	.	C	T	.	map_qual;normal_artifact;weak_evidence	.	93	124	1	DOWNSTREAM(MODIFIER||3845||NBPF1|processed_transcript|CODING|ENST00000420513|)	GAAACAACTG[C/T]AACCCATAAA	93	38,25	263281	40,27	25	-3.04	.	9.42	.	.	0.644	.	.	.	1	.	19	.	4.16	.	63,4	48,4	0.07	0.091	67	52	30,4	27,0	32,0
chr1	16589971	A	G	NON_SYNONYMOUS_CODING	MODERATE	NBPF1		chr1	16589971	.	A	G	.	clustered_events;normal_artifact;strand_bias	.	93	479	3	NON_SYNONYMOUS_CODING(MODERATE|MISSENSE|tTt/tCt|F69S|NBPF1|protein_coding|CODING|ENST00000430580|8)	CCTCAGCATA[A/G]ATTTTATGAG	93	33,38	240233	40,40	25	-29.53	.	15.07	.	.	2.31	.	.	.	93	.	1	.	40.18	.	223,16	211,18	0.07	0.082	239	229	100,10	118,12	115,6
chr1	16589988	A	G	SYNONYMOUS_CODING	LOW	NBPF1		chr1	16589988	.	A	G	.	clustered_events;normal_artifact;strand_bias	.	93	459	3	SYNONYMOUS_CODING(LOW|SILENT|tgT/tgC|C63|NBPF1|protein_coding|CODING|ENST00000430580|8)	TGAGGTCTTT[A/G]CACTCTTCAT	93	30,38	238228	40,40	13	-21	.	25.61	.	.	3.06	.	.	.	93	.	1	.	18.98	.	217,12	210,10	0.056	0.049	229	220	97,7	113,8	108,5
chr1	16590000	C	T	SYNONYMOUS_CODING	LOW	NBPF1		chr1	16590000	.	C	T	.	clustered_events;normal_artifact;strand_bias	.	93	445	3	SYNONYMOUS_CODING(LOW|SILENT|aaG/aaA|K59|NBPF1|protein_coding|CODING|ENST00000430580|8)	ACTCTTCATA[C/T]TCTGAGAAAA	93	35,34	237233	40,33	3	-9.518	.	41.48	.	.	3.29	.	.	.	4	.	1	.	6.03	.	217,8	206,6	0.039	0.032	225	212	103,4	119,6	111,4
chr1	16591236	G	C	DOWNSTREAM	MODIFIER	NBPF1		chr1	16591236	.	G	C	.	germline;weak_evidence	.	93	16	1	DOWNSTREAM(MODIFIER||2326||NBPF1|processed_transcript|CODING|ENST00000420513|)	TCCTCACCTC[G/C]TGCTCTGCCC	1	29,20	225229	46,47	48	0.954	.	2.4	.	.	0.73	.	.	.	1	.	37	.	5.41	.	8,0	5,3	0.1	0.4	8	8	7,0	3,3	1,0
chr1	16592222	C	T	UTR_5_PRIME	MODIFIER	NBPF1		chr1	16592222	.	C	T	.	map_qual;normal_artifact	.	93	134	2	UTR_5_PRIME(MODIFIER||201||NBPF1|protein_coding|CODING|ENST00000430580|6)	AAACAAGGTT[C/T]GAGGTGCCTG	37	30,20	237235	27,27	37	-3.854	.	6.48	.	.	0.369	.	.	.	93	.	93	.	31.07	.	52,3	53,18	0.069	0.26	55	71	27,3	24,14	25,0
chr1	16592239	G	C	START_GAINED	LOW	NBPF1		chr1	16592239	.	G	C	.	map_qual;normal_artifact	.	93	151	2	START_GAINED(LOW||||NBPF1|protein_coding|CODING|ENST00000430580|6)	CCTGAACTCA[G/C]AGCTGAAAGC	20	37,20	231235	27,27	30	-6.806	.	4.41	.	.	0.37	.	.	.	93	.	93	.	29.35	.	62,5	59,20	0.086	0.253	67	79	28,5	22,16	31,0
chr1	16611078	C	T	UPSTREAM	MODIFIER	NBPF1		chr1	16611078	.	C	T	.	germline;weak_evidence	.	93	27	1	UPSTREAM(MODIFIER||2428||NBPF1|processed_transcript|CODING|ENST00000420513|)	ATAAGGTTAA[C/T]ACAGAAAAAT	1	35,20	254194	60,60	56	1.01	.	2.41	.	.	0.558	.	.	.	2	.	46	.	5.6	.	8,0	10,4	0.091	0.309	8	14	4,0	6,2	4,0
chr1	16612192	C	T	UPSTREAM	MODIFIER	NBPF1		chr1	16612192	.	C	T	.	germline;weak_evidence	.	93	18	1	UPSTREAM(MODIFIER||3542||NBPF1|processed_transcript|CODING|ENST00000420513|)	GGTTTTGCCA[C/T]ATTGCCCAGG	1	35,20	236242	60,60	9	1	.	2.7	.	.	0.561	.	.	.	1	.	32	.	4.5	.	9,0	6,3	0.091	0.362	9	9	7,0	0,2	2,0
chr1	16619787	C	T	DOWNSTREAM	MODIFIER	RP5-1182A14.5		chr1	16619787	.	C	T	.	normal_artifact	.	93	153	1	DOWNSTREAM(MODIFIER||2058||RP5-1182A14.5|lincRNA|NON_CODING|ENST00000607700|)	GAGCAGGGCC[C/T]GGCCCCAGAA	93	20,37	240240	60,60	43	-8.064	.	5.68	.	.	0.804	.	.	.	93	.	31	.	21.25	.	68,4	69,10	0.068	0.135	72	79	31,2	34,6	37,2
chr1	16620250	G	A	DOWNSTREAM	MODIFIER	RP5-1182A14.5		chr1	16620250	.	G	A	.	germline;weak_evidence	.	93	19	1	DOWNSTREAM(MODIFIER||2521||RP5-1182A14.5|lincRNA|NON_CODING|ENST00000607700|)	GATCCCCTGC[G/A]GAGAGACAAG	1	20,34	219248	59,54	36	1.08	.	3.31	.	.	0.614	.	.	.	2	.	9	.	5.27	.	11,0	6,2	0.077	0.305	11	8	7,0	4,0	3,0
chr1	16624174	T	C	DOWNSTREAM	MODIFIER	CROCCP2		chr1	16624174	.	T	C	.	PASS	.	93	57	1	DOWNSTREAM(MODIFIER||1201||CROCCP2|processed_transcript|NON_CODING|ENST00000635081|)	CCAGACTCCT[T/C]AGTAACTGCC	73	33,37	271290	60,60	21	1.39	.	6.92	.	.	1.42	.	.	.	21	.	21	.	7.31	.	23,0	29,3	0.039	0.117	23	32	12,0	14,1	9,0
chr1	16625553	G	A	DOWNSTREAM	MODIFIER	CROCCP2		chr1	16625553	.	G	A	.	weak_evidence	.	93	36	1	DOWNSTREAM(MODIFIER||4117||CROCCP2|retained_intron|NON_CODING|ENST00000362058|)	GATTATAGGC[G/A]TGAGCCACTG	28	29,33	226242	60,60	61	1.28	.	5.41	.	.	1	.	.	.	1	.	20	.	4.09	.	18,0	16,2	0.05	0.15	18	18	12,0	7,1	6,0
chr1	16626155	G	T	DOWNSTREAM	MODIFIER	CROCCP2		chr1	16626155	.	G	T	.	normal_artifact	.	93	443	1	DOWNSTREAM(MODIFIER||3515||CROCCP2|retained_intron|NON_CODING|ENST00000362058|)	ACACTGGGGA[G/T]GGGGAGATGA	93	37,32	251242	60,60	36	-31.25	.	8.27	.	.	0.688	.	.	.	93	.	93	.	50.47	.	206,17	181,29	0.079	0.137	223	210	104,5	84,14	98,12
chr1	16632678	G	A	INTRON	MODIFIER	CROCCP2		chr1	16632678	.	G	A	.	germline	.	93	24	1	INTRON(MODIFIER||||CROCCP2|retained_intron|NON_CODING|ENST00000362058|3)	TCGCTGTGTC[G/A]TCCAGGCCGG	1	20,26	242236	60,34	34	1.11	.	3.56	.	.	0.636	.	.	.	16	.	33	.	7.5	.	12,0	8,4	0.072	0.356	12	12	9,0	6,3	1,0
chr1	16632769	G	T	INTRON	MODIFIER	CROCCP2		chr1	16632769	.	G	T	.	PASS	.	93	32	1	INTRON(MODIFIER||||CROCCP2|retained_intron|NON_CODING|ENST00000362058|3)	CTCCCTCGTA[G/T]CTGGGATTAG	3	37,32	241303	47,60	49	1.09	.	3.31	.	.	0.686	.	.	.	13	.	25	.	6.56	.	11,0	17,3	0.075	0.183	11	20	6,0	11,2	5,0
chr1	16634402	TGTGTGTGTGTGTGTGC	T	UPSTREAM	MODIFIER	CROCCP2		chr1	16634402	.	TGTGTGTGTGTGTGTGC	T	.	germline;normal_artifact	.	93	37	1	UPSTREAM(MODIFIER||1057||CROCCP2|transcribed_unprocessed_pseudogene|NON_CODING|ENST00000412962|)	GTGTGTGTGT[GTGTGTGTGTGTGTGC/-]GCGTGTGTGA	1	20,32	234257	60,60	23	0.265	.	2.92	.	.	0.471	.	.	.	32	.	93	.	9.86	.	16,1	14,4	0.102	0.237	17	18	4,1	7,3	8,0
chr1	16636345	ACAAACAAACAAACAAC	A	UPSTREAM	MODIFIER	CROCCP2		chr1	16636345	.	ACAAACAAACAAACAAC	A	.	weak_evidence	.	93	31	1	UPSTREAM(MODIFIER||3000||CROCCP2|transcribed_unprocessed_pseudogene|NON_CODING|ENST00000412962|)	CTCAAACAAA[CAAACAAACAAACAAC/-]CAAACAAACA	3	23,24	270229	60,60	28	1.22	.	4.46	.	.	1.57	.	.	.	1	.	93	.	5.95	.	15,0	11,2	0.057	0.2	15	13	7,0	3,0	7,0
chr1	16642156	G	A	UPSTREAM	MODIFIER	MST1P2		chr1	16642156	.	G	A	.	germline;normal_artifact;weak_evidence	.	93	46	1	UPSTREAM(MODIFIER||3466||MST1P2|unprocessed_pseudogene|NON_CODING|ENST00000457982|)	TGGGACTACA[G/A]GTGCACACCA	1	36,20	240221	48,60	28	-1.056	.	2.32	.	.	0.785	.	.	.	1	.	42	.	4.88	.	22,2	15,4	0.112	0.235	24	19	11,2	7,2	11,0
chr1	16642782	G	T	UPSTREAM	MODIFIER	MST1P2		chr1	16642782	.	G	T	.	normal_artifact	.	93	1608	2	UPSTREAM(MODIFIER||2840||MST1P2|unprocessed_pseudogene|NON_CODING|ENST00000457982|)	GGTGGCTGCT[G/T]GGGGTGCATG	93	28,20	236227	60,60	39	-83.98	.	45.13	.	.	1.46	.	.	.	93	.	93	.	61.58	.	690,69	779,49	0.084	0.057	759	828	331,35	354,26	351,27
chr1	16642820	T	C	UPSTREAM	MODIFIER	MST1P2		chr1	16642820	.	T	C	.	normal_artifact	.	93	1838	2	UPSTREAM(MODIFIER||2802||MST1P2|unprocessed_pseudogene|NON_CODING|ENST00000457982|)	GCGGTTCAGG[T/C]AGTCATTCAG	93	30,36	239226	60,60	36	-132.4	.	20.68	.	.	6	.	.	.	93	.	93	.	105.71	.	788,68	859,63	0.079	0.067	856	922	387,39	388,32	373,29
chr1	16645552	A	G	UPSTREAM	MODIFIER	CROCCP2		chr1	16645552	.	A	G	.	normal_artifact	.	93	2138	1	UPSTREAM(MODIFIER||869||CROCCP2|retained_intron|NON_CODING|ENST00000362058|)	AGAGCCACCC[A/G]ATCCCGTAGG	93	32,20	237232	48,47	37	-132.6	.	52.08	.	.	1.29	.	.	.	93	.	93	.	147.2	.	962,86	960,96	0.08	0.09	1048	1056	468,35	431,34	462,50
chr1	16645639	C	T	UPSTREAM	MODIFIER	CROCCP2		chr1	16645639	.	C	T	.	clustered_events;normal_artifact	.	93	2583	7	UPSTREAM(MODIFIER||956||CROCCP2|retained_intron|NON_CODING|ENST00000362058|)	GGGGTGGCTC[C/T]CACTCCTGCT	93	20,34	231242	60,45	46	-186.1	.	39.23	.	.	0.351	.	.	.	93	.	93	.	171.83	.	1168104	1153,96	0.08	0.074	1272	1249	562,51	555,46	594,52
chr1	16645687	C	T	UPSTREAM	MODIFIER	CROCCP2		chr1	16645687	.	C	T	.	clustered_events	.	93	2127	7	UPSTREAM(MODIFIER||1004||CROCCP2|retained_intron|NON_CODING|ENST00000362058|)	TGGTGAGTGC[C/T]CCCAACCTTG	93	20,33	232243	60,60	27	3.02	.	311.96	.	.	6	.	.	.	93	.	32	.	21.86	.	1041,0	1015,20	0.0009522	0.019	1041	1035	513,0	491,14	513,0
chr1	16645695	T	C	UPSTREAM	MODIFIER	CROCCP2		chr1	16645695	.	T	C	.	clustered_events;normal_artifact	.	93	2013	7	UPSTREAM(MODIFIER||1012||CROCCP2|retained_intron|NON_CODING|ENST00000362058|)	GCCCCCAACC[T/C]TGATCCCCAT	93	20,38	232257	60,40	16	-82.38	.	123.29	.	.	0.378	.	.	.	93	.	19	.	46.28	.	920,51	956,31	0.048	0.031	971	987	433,28	461,19	444,22
chr1	16645722	C	G	UPSTREAM	MODIFIER	CROCCP2		chr1	16645722	.	C	G	.	clustered_events;haplotype;map_qual;normal_artifact	.	93	1581	7	UPSTREAM(MODIFIER||1039||CROCCP2|retained_intron|NON_CODING|ENST00000362058|)	TCAGGAGGGG[C/G]TTGGCCCCAT	93	36,36	236307	60,27	32	-19.12	.	172.67	.	.	0.344	.	.	.	93	.	17	.	26.58	.	730,16	770,18	0.018	0.023	746	788	351,5	391,5	348,11
chr1	16645744	G	A	UPSTREAM	MODIFIER	CROCCP2		chr1	16645744	.	G	A	.	clustered_events;haplotype;map_qual;normal_artifact	.	93	1203	7	UPSTREAM(MODIFIER||1061||CROCCP2|retained_intron|NON_CODING|ENST00000362058|)	CTCCTATTCT[G/A]GGATGAGAAA	93	36,36	242299	60,27	25	-30.55	.	104.46	.	.	0.338	.	.	.	93	.	21	.	40.56	.	562,21	591,28	0.036	0.044	583	619	257,9	287,9	272,10
chr1	16645783	C	T	UPSTREAM	MODIFIER	CROCCP2		chr1	16645783	.	C	T	.	clustered_events;normal_artifact	.	93	705	7	UPSTREAM(MODIFIER||1100||CROCCP2|retained_intron|NON_CODING|ENST00000362058|)	GCTCAGTGGG[C/T]ATGGGGCAGT	93	38,31	263258	60,60	25	-16.92	.	57.77	.	.	6	.	.	.	62	.	4	.	12.61	.	312,11	347,9	0.037	0.028	323	356	153,3	173,5	154,8
chr1	16645799	T	C	UPSTREAM	MODIFIER	CROCCP2		chr1	16645799	.	T	C	.	clustered_events;normal_artifact	.	93	561	7	UPSTREAM(MODIFIER||1116||CROCCP2|retained_intron|NON_CODING|ENST00000362058|)	GCAGTGACCT[T/C]GGCCTCTTGA	93	33,30	266306	60,45	61	-23.94	.	25.36	.	.	0.329	.	.	.	93	.	5	.	38.77	.	241,17	264,24	0.066	0.085	258	288	117,7	134,10	121,9
chr1	16646924	G	A	UPSTREAM	MODIFIER	CROCCP2		chr1	16646924	.	G	A	.	map_qual;normal_artifact;strand_bias	.	93	1773	1	UPSTREAM(MODIFIER||2241||CROCCP2|retained_intron|NON_CODING|ENST00000362058|)	CCTTCCCTCC[G/A]TCCCGGCCTG	93	30,33	260239	40,25	15	-108.7	.	40.01	.	.	0.456	.	.	.	93	.	1	.	82.48	.	779,70	799,57	0.083	0.065	849	856	390,28	384,29	357,42
chr1	16647153	A	G	UPSTREAM	MODIFIER	CROCCP2		chr1	16647153	.	A	G	.	map_qual;normal_artifact;strand_bias	.	93	2372	1	UPSTREAM(MODIFIER||2470||CROCCP2|retained_intron|NON_CODING|ENST00000362058|)	GAGTGGAGGG[A/G]CAAGCCCACG	93	31,38	250228	27,25	52	-28.24	.	254.63	.	.	1.6	.	.	.	93	.	1	.	32.91	.	1123,31	1146,34	0.027	0.029	1154	1180	524,16	536,17	590,15
chr1	16647314	G	A	UPSTREAM	MODIFIER	CROCCP2		chr1	16647314	.	G	A	.	map_qual;normal_artifact;strand_bias	.	93	1023	1	UPSTREAM(MODIFIER||2631||CROCCP2|retained_intron|NON_CODING|ENST00000362058|)	CTTCGAGCCG[G/A]GCAAGTACGC	93	38,33	267253	25,27	34	-70.03	.	9.87	.	.	3.33	.	.	.	93	.	1	.	91.72	.	428,40	470,50	0.087	0.097	468	520	200,19	232,18	225,21
chr1	16647748	G	C	UPSTREAM	MODIFIER	CROCCP2		chr1	16647748	.	G	C	.	clustered_events;map_qual;normal_artifact;strand_bias	.	93	338	3	UPSTREAM(MODIFIER||3065||CROCCP2|retained_intron|NON_CODING|ENST00000362058|)	GATCTCAGCT[G/C]TCGCTCGGGG	93	37,37	247295	46,27	28	-10.65	.	27.63	.	.	0.385	.	.	.	93	.	1	.	26.31	.	171,8	139,15	0.049	0.102	179	154	70,3	62,9	94,5
chr1	16647782	A	C	SPLICE_SITE_ACCEPTOR	HIGH	MST1P2		chr1	16647782	.	A	C	.	clustered_events;map_qual;normal_artifact;strand_bias	.	93	524	3	SPLICE_SITE_ACCEPTOR(HIGH||||MST1P2|unprocessed_pseudogene|NON_CODING|ENST00000457982|7)	GGTCCATCTA[A/C]GGGTCCGAGG	93	34,36	247274	40,27	27	-24.42	.	31.07	.	.	0.757	.	.	.	93	.	1	.	34.6	.	258,15	224,20	0.058	0.085	273	244	113,10	96,12	139,5
chr1	16647817	G	C	UPSTREAM	MODIFIER	CROCCP2		chr1	16647817	.	G	C	.	clustered_events;normal_artifact;strand_bias	.	93	770	3	UPSTREAM(MODIFIER||3134||CROCCP2|retained_intron|NON_CODING|ENST00000362058|)	GAGGCCACAA[G/C]TGTCAGCTGC	93	37,36	247250	40,40	26	-57.22	.	19.25	.	.	1.57	.	.	.	93	.	1	.	53.09	.	375,27	321,24	0.068	0.072	402	345	172,10	161,11	198,16
chr1	16647966	GC	G	UPSTREAM	MODIFIER	CROCCP2		chr1	16647966	.	GC	G	.	normal_artifact	.	93	2017	2	UPSTREAM(MODIFIER||3284||CROCCP2|retained_intron|NON_CODING|ENST00000362058|)	GGTGGGGGGG[C/-]GGGCGTTGGG	93	37,20	242222	60,51	40	-21.05	.	203.69	.	.	6	.	.	.	64	.	93	.	12.85	.	945,48	908,39	0.028	0.022	993	947	440,29	437,27	479,19
chr1	16648054	C	G	UPSTREAM	MODIFIER	CROCCP2		chr1	16648054	.	C	G	.	normal_artifact;strand_bias	.	93	3075	2	UPSTREAM(MODIFIER||3371||CROCCP2|retained_intron|NON_CODING|ENST00000362058|)	GGGCTGAGTG[C/G]AGCGCCTGCT	93	29,38	236261	48,45	20	-11.83	.	412.75	.	.	2.46	.	.	.	24	.	1	.	8.99	.	1495,9	1495,9	0.006584	0.005925	1504	1504	726,6	721,6	751,3
chr1	16648285	C	T	UPSTREAM	MODIFIER	CROCCP2		chr1	16648285	.	C	T	.	map_qual;normal_artifact;strand_bias	.	93	906	1	UPSTREAM(MODIFIER||3602||CROCCP2|retained_intron|NON_CODING|ENST00000362058|)	GATGGCTGCC[C/T]GCACCGGCCG	93	30,34	256281	27,25	31	-65.37	.	13.37	.	.	0.378	.	.	.	93	.	1	.	47.35	.	433,44	382,33	0.092	0.081	477	415	210,21	171,13	207,22
chr1	16648477	C	T	UPSTREAM	MODIFIER	CROCCP2		chr1	16648477	.	C	T	.	map_qual;normal_artifact	.	93	1436	2	UPSTREAM(MODIFIER||3794||CROCCP2|retained_intron|NON_CODING|ENST00000362058|)	GGACCAGAGC[C/T]TGGAAATGGT	93	26,37	226223	45,25	43	-68.92	.	40.25	.	.	0.469	.	.	.	93	.	74	.	93.74	.	596,66	590,84	0.087	0.105	662	674	291,37	283,45	294,28
chr1	16648589	G	A	UPSTREAM	MODIFIER	CROCCP2		chr1	16648589	.	G	A	.	map_qual;normal_artifact	.	93	1164	2	UPSTREAM(MODIFIER||3906||CROCCP2|retained_intron|NON_CODING|ENST00000362058|)	AGACCCAGAT[G/A]GGGATAGCCA	93	35,31	230224	27,27	28	-61.19	.	26.7	.	.	0.833	.	.	.	93	.	93	.	101.12	.	482,52	523,80	0.089	0.121	534	603	228,24	257,44	245,27
chr1	16648707	T	C	UPSTREAM	MODIFIER	CROCCP2		chr1	16648707	.	T	C	.	map_qual;normal_artifact	.	93	638	2	UPSTREAM(MODIFIER||4024||CROCCP2|retained_intron|NON_CODING|ENST00000362058|)	GCCTCAGCCC[T/C]CACCACCAAA	93	20,38	239282	27,27	14	-38.14	.	16.08	.	.	0.349	.	.	.	93	.	22	.	33.19	.	274,21	324,18	0.074	0.055	295	342	131,10	160,5	141,11
chr1	16648783	AC	A	UPSTREAM	MODIFIER	CROCCP2		chr1	16648783	.	AC	A	.	map_qual;strand_bias;weak_evidence	.	93	555	2	UPSTREAM(MODIFIER||4101||CROCCP2|retained_intron|NON_CODING|ENST00000362058|)	CAATCCTGGA[C/-]CCCCCCAGGT	93	33,32	251238	27,27	15	1.67	.	74.67	.	.	4.01	.	7,6	C	1	STR	1	93	4.58	.	258,1	269,7	0.007127	0.025	259	276	116,1	126,4	140,0
chr1	16649373	T	A	UPSTREAM	MODIFIER	CROCCP2		chr1	16649373	.	T	A	.	map_qual;normal_artifact;strand_bias	.	93	572	2	UPSTREAM(MODIFIER||4690||CROCCP2|retained_intron|NON_CODING|ENST00000362058|)	AGAGCTTCTC[T/A]CCCAGCCATA	93	34,32	268263	27,27	27	-29.72	.	23.79	.	.	0.71	.	.	.	93	.	1	.	39.96	.	263,19	253,23	0.068	0.084	282	276	133,6	109,8	129,12
chr1	16649417	CCCTGTT	C	UPSTREAM	MODIFIER	CROCCP2		chr1	16649417	.	CCCTGTT	C	.	map_qual;normal_artifact	.	93	503	2	UPSTREAM(MODIFIER||4735||CROCCP2|retained_intron|NON_CODING|ENST00000362058|)	GGTTGGGCAC[CCTGTT/-]CCAGAACCCA	93	36,38	267295	27,27	31	-11.27	.	49.17	.	.	0.68	.	.	.	17	.	93	.	10.35	.	241,6	231,5	0.028	0.025	247	236	109,3	91,2	122,3
chr1	16649939	G	A	EXON	MODIFIER	MST1P2		chr1	16649939	.	G	A	.	normal_artifact	.	93	808	2	EXON(MODIFIER||||MST1P2|unprocessed_pseudogene|NON_CODING|ENST00000457982|17)	GCCCCTGTGG[G/A]GGCCTGTGAG	93	36,34	260234	31,47	31	-34.5	.	46.45	.	.	6	.	.	.	93	.	11	.	18.05	.	372,21	382,14	0.055	0.036	393	396	199,3	182,7	168,18
chr1	16649956	G	A	INTRON	MODIFIER	MST1P2		chr1	16649956	.	G	A	.	map_qual;normal_artifact;strand_bias	.	93	826	2	INTRON(MODIFIER||||MST1P2|unprocessed_pseudogene|NON_CODING|ENST00000457982|17)	TGAGGTTGGT[G/A]GCAGGGCCCT	93	36,31	258293	37,25	44	-47.88	.	23.33	.	.	0.403	.	.	.	93	.	1	.	59.17	.	376,34	353,40	0.082	0.099	410	393	189,15	169,18	177,17
chr1	16650074	G	A	EXON	MODIFIER	MST1P2		chr1	16650074	.	G	A	.	map_qual;normal_artifact	.	93	1327	1	EXON(MODIFIER||||MST1P2|unprocessed_pseudogene|NON_CODING|ENST00000457982|18)	TACCTGCCAG[G/A]GTGACTACGG	93	36,29	247232	43,27	41	-97.54	.	5.99	.	.	0.424	.	.	.	93	.	93	.	126.27	.	579,61	580,83	0.095	0.124	640	663	292,27	270,55	278,33
chr1	16650277	G	T	EXON	MODIFIER	MST1P2		chr1	16650277	.	G	T	.	normal_artifact;strand_bias	.	93	770	2	EXON(MODIFIER||||MST1P2|unprocessed_pseudogene|NON_CODING|ENST00000457982|18)	GACAAAACTT[G/T]TAAGTACAGT	93	35,35	248244	40,40	14	-46.88	.	19.41	.	.	1.22	.	.	.	93	.	1	.	47.49	.	332,25	359,25	0.072	0.066	357	384	162,10	190,12	166,15
chr1	16650291	G	C	DOWNSTREAM	MODIFIER	MST1P2		chr1	16650291	.	G	C	.	map_qual;normal_artifact;strand_bias	.	93	605	2	DOWNSTREAM(MODIFIER||2||MST1P2|unprocessed_pseudogene|NON_CODING|ENST00000457982|)	GTACAGTCAA[G/C]GACAAGACTT	93	36,30	252264	43,25	16	-15.52	.	46.75	.	.	1.57	.	.	.	93	.	1	.	15.34	.	277,13	279,12	0.047	0.044	290	291	135,7	148,6	133,6
chr1	16705509	G	A	DOWNSTREAM	MODIFIER	ESPNP		chr1	16705509	.	G	A	.	weak_evidence	.	93	10	1	DOWNSTREAM(MODIFIER||1415||ESPNP|processed_transcript|NON_CODING|ENST00000492551|)	CGCGGTCTTG[G/A]CTCAGTGCAA	18	25,34	228310	49,47	62	0.974	.	2.4	.	.	6	.	.	.	1	.	19	.	3.58	.	8,0	0,1	0.097	0.667	8	1	6,0	0,1	2,0
chr1	16757082	C	T	DOWNSTREAM	MODIFIER	MST1L		chr1	16757082	.	C	T	.	map_qual;normal_artifact;weak_evidence	.	93	149	2	DOWNSTREAM(MODIFIER||971||MST1L|processed_transcript|NON_CODING|ENST00000544155|)	TGTTTACTTG[C/T]AGGGGGAAAA	93	38,31	276227	60,27	22	-2.647	.	12.94	.	.	0.74	.	.	.	1	.	6	.	4.3	.	71,3	57,4	0.052	0.077	74	61	31,2	33,2	40,1
chr1	16757102	G	A	DOWNSTREAM	MODIFIER	MST1L		chr1	16757102	.	G	A	.	map_qual;normal_artifact	.	93	224	2	DOWNSTREAM(MODIFIER||951||MST1L|processed_transcript|NON_CODING|ENST00000544155|)	AACCATTTTC[G/A]TTTAAGAAAG	93	30,33	272230	60,27	21	-11.41	.	7.99	.	.	0.67	.	.	.	13	.	5	.	6.51	.	101,8	90,5	0.08	0.06	109	95	46,5	45,2	53,3
chr1	16757281	C	A	DOWNSTREAM	MODIFIER	MST1L		chr1	16757281	.	C	A	.	clustered_events;map_qual;normal_artifact	.	93	1015	4	DOWNSTREAM(MODIFIER||772||MST1L|processed_transcript|NON_CODING|ENST00000544155|)	CACAGAGACA[C/A]GCGTGAAGAC	93	30,35	240243	48,25	39	-66.37	.	16.95	.	.	0.788	.	.	.	93	.	93	.	68.68	.	448,43	460,42	0.086	0.085	491	502	207,19	232,19	235,22
chr1	16757321	G	A	DOWNSTREAM	MODIFIER	MST1L		chr1	16757321	.	G	A	.	clustered_events;map_qual;normal_artifact;strand_bias;weak_evidence	.	93	1084	4	DOWNSTREAM(MODIFIER||732||MST1L|processed_transcript|NON_CODING|ENST00000544155|)	GTGCATACTC[G/A]GTTGGGGATT	93	29,37	241229	48,27	25	-3.583	.	135.55	.	.	0.652	.	.	.	1	.	1	.	4.72	.	517,8	544,7	0.014	0.014	525	551	241,4	255,4	256,3
chr1	16757377	G	A	DOWNSTREAM	MODIFIER	MST1L		chr1	16757377	.	G	A	.	clustered_events;normal_artifact	.	93	897	4	DOWNSTREAM(MODIFIER||676||MST1L|processed_transcript|NON_CODING|ENST00000544155|)	GCAGGCAAGT[G/A]GGCCCCCGTA	93	35,37	243329	48,40	40	-29.35	.	66.04	.	.	0.467	.	.	.	9	.	13	.	7.52	.	406,16	438,8	0.04	0.02	422	446	204,9	214,6	197,7
chr1	16757434	A	C	DOWNSTREAM	MODIFIER	MST1L		chr1	16757434	.	A	C	.	clustered_events;map_qual;normal_artifact	.	93	737	4	DOWNSTREAM(MODIFIER||619||MST1L|processed_transcript|NON_CODING|ENST00000544155|)	GGGCCACAGC[A/C]ATGACTAGCC	93	33,37	251330	40,25	47	-16.5	.	66.69	.	.	0.281	.	.	.	47	.	30	.	10.72	.	346,12	345,11	0.035	0.033	358	356	168,7	161,7	169,5
chr1	16757511	C	T	DOWNSTREAM	MODIFIER	MST1L		chr1	16757511	.	C	T	.	map_qual;normal_artifact	.	93	1325	1	DOWNSTREAM(MODIFIER||542||MST1L|processed_transcript|NON_CODING|ENST00000544155|)	AGGGCCCTGC[C/T]ACCAACCTCA	93	36,37	244226	43,25	39	-34.87	.	100.19	.	.	0.311	.	.	.	93	.	86	.	39.07	.	601,31	614,34	0.048	0.051	632	648	311,11	303,17	282,18
chr1	16758511	C	T	DOWNSTREAM	MODIFIER	MST1L		chr1	16758511	.	C	T	.	map_qual;normal_artifact	.	93	1602	2	DOWNSTREAM(MODIFIER||2326||MST1L|processed_transcript|NON_CODING|ENST00000545160|)	CGGATGGCCC[C/T]CAGCCACGCG	93	20,20	221220	27,27	42	-65.34	.	55.19	.	.	0.86	.	.	.	93	.	93	.	130.43	.	654,65	745109	0.087	0.122	719	854	361,30	373,49	283,32
chr1	16758533	G	A	DOWNSTREAM	MODIFIER	MST1L		chr1	16758533	.	G	A	.	map_qual;normal_artifact;strand_bias	.	93	1546	2	DOWNSTREAM(MODIFIER||2304||MST1L|processed_transcript|NON_CODING|ENST00000545160|)	AGCTTGGAAC[G/A]ACGCTGATCC	93	20,34	221235	27,25	62	-8.968	.	172.94	.	.	1.7	.	.	.	84	.	1	.	15.18	.	692,13	807,19	0.019	0.023	705	826	375,6	389,10	302,7
chr1	16758676	TG	T	DOWNSTREAM	MODIFIER	MST1L		chr1	16758676	.	TG	T	.	normal_artifact	.	93	835	1	DOWNSTREAM(MODIFIER||2160||MST1L|processed_transcript|NON_CODING|ENST00000545160|)	CTCGTAACCT[G/-]GGGGGGTCCA	93	32,29	250248	41,40	35	-8.614	.	65.87	.	.	6	.	7,6	G	93	STR	93	93	65.53	.	340,19	368,71	0.037	0.142	359	439	170,9	170,40	156,10
chr1	16758770	T	C	DOWNSTREAM	MODIFIER	MST1L		chr1	16758770	.	T	C	.	haplotype;map_qual;normal_artifact;strand_bias	.	93	1430	2	DOWNSTREAM(MODIFIER||2067||MST1L|processed_transcript|NON_CODING|ENST00000545160|)	AGGGCTGAGG[T/C]AAGGTCATGG	93	30,38	242309	60,25	43	-38.15	.	130.08	.	.	0.182	.	.	.	93	.	1	.	22.87	.	665,18	727,12	0.026	0.017	683	739	310,6	355,5	318,9
chr1	16758772	A	G	DOWNSTREAM	MODIFIER	MST1L		chr1	16758772	.	A	G	.	haplotype;map_qual;normal_artifact;strand_bias	.	93	1442	2	DOWNSTREAM(MODIFIER||2065||MST1L|processed_transcript|NON_CODING|ENST00000545160|)	GGCTGAGGTA[A/G]GGTCATGGGG	93	34,38	242309	60,25	44	-38.15	.	130.06	.	.	0.182	.	.	.	93	.	1	.	22.87	.	665,18	727,12	0.026	0.017	683	739	312,7	364,5	330,10
chr1	16758990	G	A	UPSTREAM	MODIFIER	MST1L		chr1	16758990	.	G	A	.	clustered_events;map_qual;normal_artifact;strand_bias	.	93	2145	3	UPSTREAM(MODIFIER||118||MST1L|processed_transcript|NON_CODING|ENST00000455405|)	ACCATTTCCA[G/A]GCTCTGGTCC	93	36,35	245296	29,25	28	-12.12	.	249.52	.	.	1.14	.	.	.	5	.	1	.	7.05	.	985,18	1073,13	0.017	0.012	1003	1086	467,9	514,10	501,8
chr1	16759047	G	A	UPSTREAM	MODIFIER	MST1L		chr1	16759047	.	G	A	.	clustered_events;map_qual;normal_artifact;strand_bias	.	93	1918	3	UPSTREAM(MODIFIER||175||MST1L|processed_transcript|NON_CODING|ENST00000455405|)	TGGCGGGGCC[G/A]GGAGCACCAG	93	29,33	250288	33,25	55	-48.85	.	142.42	.	.	0.381	.	.	.	93	.	1	.	36.46	.	844,43	912,34	0.047	0.036	887	946	406,27	466,21	429,15
chr1	16759069	A	G	UPSTREAM	MODIFIER	MST1L		chr1	16759069	.	A	G	.	clustered_events;map_qual;normal_artifact;strand_bias	.	93	1895	3	UPSTREAM(MODIFIER||197||MST1L|processed_transcript|NON_CODING|ENST00000455405|)	GACTCACTGC[A/G]GCTTGTGCGG	93	32,30	250278	40,25	48	-123.6	.	34.45	.	.	0.325	.	.	.	93	.	1	.	92.95	.	816,71	905,58	0.079	0.06	887	963	388,40	455,35	412,28
chr1	16759296	G	A	UPSTREAM	MODIFIER	MST1L		chr1	16759296	.	G	A	.	clustered_events;normal_artifact;strand_bias	.	93	2244	3	UPSTREAM(MODIFIER||424||MST1L|processed_transcript|NON_CODING|ENST00000455405|)	TCTGTACAAC[G/A]CCGGATCTGG	93	29,31	231214	47,41	25	-70.12	.	148.66	.	.	0.917	.	.	.	93	.	1	.	65.71	.	982,53	1096,55	0.05	0.046	1035	1151	510,26	551,22	450,26
chr1	16759300	G	T	UPSTREAM	MODIFIER	MST1L		chr1	16759300	.	G	T	.	clustered_events;normal_artifact;strand_bias	.	93	2278	3	UPSTREAM(MODIFIER||428||MST1L|processed_transcript|NON_CODING|ENST00000455405|)	TACAACGCCG[G/T]ATCTGGTAGC	93	37,31	231221	48,45	31	-84.25	.	124.73	.	.	0.506	.	.	.	93	.	1	.	164.9	.	980,64	1051104	0.059	0.089	1044	1155	514,23	532,40	452,36
chr1	16759325	G	A	UPSTREAM	MODIFIER	MST1L		chr1	16759325	.	G	A	.	clustered_events;map_qual;normal_artifact;strand_bias	.	93	2210	3	UPSTREAM(MODIFIER||453||MST1L|processed_transcript|NON_CODING|ENST00000455405|)	GCCCACGCGC[G/A]TGCCGGGCCG	93	29,31	229224	50,25	5	-13.75	.	261.49	.	.	1.59	.	.	.	93	.	1	.	24.84	.	1031,17	1089,26	0.016	0.023	1048	1115	518,6	540,13	493,11
chr1	16760375	T	C	UPSTREAM	MODIFIER	MST1L		chr1	16760375	.	T	C	.	map_qual;normal_artifact	.	93	1671	1	UPSTREAM(MODIFIER||1503||MST1L|processed_transcript|NON_CODING|ENST00000455405|)	GATTTGATGC[T/C]GCAGCTCTGG	93	20,36	230264	48,25	41	-127.3	.	4.33	.	.	0.29	.	.	.	93	.	93	.	123.01	.	732,76	753,76	0.094	0.091	808	829	350,38	378,28	366,37
chr1	16760797	A	G	UPSTREAM	MODIFIER	MST1L		chr1	16760797	.	A	G	.	clustered_events;haplotype;map_qual;normal_artifact;strand_bias	.	93	1987	3	UPSTREAM(MODIFIER||1925||MST1L|processed_transcript|NON_CODING|ENST00000455405|)	CCAGAATGCC[A/G]CAGCCTTGAG	93	31,30	244270	48,27	13	-90.79	.	133.22	.	.	0.342	.	.	.	93	.	1	.	44.63	.	932,35	981,20	0.037	0.021	967	1001	412,14	410,11	465,18
chr1	16760804	T	C	UPSTREAM	MODIFIER	MST1L		chr1	16760804	.	T	C	.	clustered_events;haplotype;map_qual;normal_artifact;strand_bias	.	93	1968	3	UPSTREAM(MODIFIER||1932||MST1L|processed_transcript|NON_CODING|ENST00000455405|)	GCCACAGCCT[T/C]GAGTGGGGCG	93	33,38	243269	48,27	19	-98.75	.	121.55	.	.	0.333	.	.	.	93	.	1	.	51.88	.	930,38	977,23	0.04	0.024	968	1000	428,16	420,13	463,21
chr1	16760810	G	C	UPSTREAM	MODIFIER	MST1L		chr1	16760810	.	G	C	.	clustered_events;haplotype;map_qual;normal_artifact;strand_bias	.	93	1926	3	UPSTREAM(MODIFIER||1938||MST1L|processed_transcript|NON_CODING|ENST00000455405|)	GCCTTGAGTG[G/C]GGCGAGTGTT	93	36,38	244268	48,27	23	-104.7	.	100.53	.	.	0.349	.	.	.	93	.	1	.	56.7	.	888,41	951,26	0.045	0.027	929	977	409,17	420,16	442,24
chr1	16858860	T	C	DOWNSTREAM	MODIFIER	MIR3675		chr1	16858860	.	T	C	.	germline;map_qual	.	93	31	1	DOWNSTREAM(MODIFIER||89||MIR3675|miRNA|NON_CODING|ENST00000583661|)	CAGGCGTCAG[T/C]CACCACGCCC	1	32,38	275276	60,21	19	1.09	.	3.31	.	.	0.712	.	.	.	29	.	7	.	8.54	.	11,0	14,5	0.075	0.287	11	19	6,0	9,3	5,0
chr1	16868736	A	G	UPSTREAM	MODIFIER	RP11-108M9.3		chr1	16868736	.	A	G	.	map_qual;normal_artifact;strand_bias	.	93	242	2	UPSTREAM(MODIFIER||2209||RP11-108M9.3|lincRNA|NON_CODING|ENST00000438002|)	CCAGTACAGA[A/G]GCTCTGCAGC	93	37,38	234257	21,27	20	-2.972	.	27.12	.	.	1.02	.	.	.	38	.	1	.	8.98	.	127,4	98,6	0.037	0.066	131	104	64,2	41,4	60,2
chr1	16868756	C	G	UPSTREAM	MODIFIER	RP11-108M9.3		chr1	16868756	.	C	G	.	map_qual;normal_artifact;strand_bias	.	93	203	2	UPSTREAM(MODIFIER||2189||RP11-108M9.3|lincRNA|NON_CODING|ENST00000438002|)	CCCTGCAGGG[C/G]TCTGACTGTT	93	38,38	244240	21,27	14	-5.568	.	13.12	.	.	1.41	.	.	.	93	.	1	.	27.78	.	90,5	83,15	0.061	0.16	95	98	44,3	34,9	43,2
chr1	16940113	TG	T	UPSTREAM	MODIFIER	CROCC		chr1	16940113	.	TG	T	.	PASS	.	93	240	1	UPSTREAM(MODIFIER||4011||CROCC|processed_transcript|CODING|ENST00000486318|)	GGTCTGAGCT[G/-]GGGGGTACTG	93	29,34	235223	60,60	12	2	.	28.3	.	.	1.11	.	6,5	G	4	STR	51	93	5.98	.	97,0	124,7	0.009898	0.053	97	131	47,0	53,2	48,0
chr1	16945549	A	G	SYNONYMOUS_CODING	LOW	CROCC		chr1	16945549	.	A	G	.	normal_artifact	.	93	577	1	SYNONYMOUS_CODING(LOW|SILENT|acA/acG|T693|CROCC|protein_coding|CODING|ENST00000375541|15)	GCCGCGCCAC[A/G]CTGCAACGGG	93	30,37	232201	60,33	3	-10.11	.	56.86	.	.	3.25	.	.	.	72	.	8	.	12.7	.	277,9	261,10	0.034	0.039	286	271	132,6	129,5	142,3
chr1	16946784	G	A	SYNONYMOUS_CODING	LOW	CROCC		chr1	16946784	.	G	A	.	PASS	.	93	609	1	SYNONYMOUS_CODING(LOW|SILENT|ctG/ctA|L769|CROCC|protein_coding|CODING|ENST00000375541|17)	AGTCCGCCCT[G/A]CAGGGCCGGC	93	29,32	232291	60,60	45	2.46	.	84.7	.	.	6	.	.	.	6	.	24	.	6.97	.	282,0	297,7	0.003467	0.025	282	304	158,0	155,4	124,0
chr1	16950991	C	T	STOP_GAINED	HIGH	CROCC		chr1	16950991	.	C	T	.	normal_artifact	.	93	122	1	STOP_GAINED(HIGH|NONSENSE|Cag/Tag|Q959*|CROCC|protein_coding|CODING|ENST00000375541|20)	AATAGCTACA[C/T]AGGAGAAAGC	93	35,20	244202	60,60	52	-3.398	.	11.81	.	.	6	.	.	.	93	.	89	.	26.16	.	70,3	33,15	0.053	0.311	73	48	35,3	17,5	33,0
chr1	16955264	C	CG	DOWNSTREAM	MODIFIER	CROCC		chr1	16955264	.	C	CG	.	normal_artifact	.	93	179	1	DOWNSTREAM(MODIFIER||484||CROCC|retained_intron|CODING|ENST00000497654|)	CCAGCTTGAC[-/G]GGGGGGGTCC	93	20,20	241237	60,60	39	-1.086	.	14.21	.	.	6	.	7,8	G	56	STR	93	93	11.99	.	74,4	72,16	0.047	0.163	78	88	34,1	35,8	40,3
chr1	17027878	GGAA	G	UPSTREAM	MODIFIER	SDHB		chr1	17027878	.	GGAA	G	.	normal_artifact;slippage	.	93	229	1	UPSTREAM(MODIFIER||4843||SDHB|retained_intron|CODING|ENST00000485092|)	TGGTTAAGAG[GAA/-]GAAGAAGAAG	93	35,36	239270	60,60	33	-0.3894	.	27.86	.	.	4.61	.	8,7	GAA	31	STR	3	1	10.14	.	107,1	66,4	0.017	0.068	108	70	50,0	33,1	50,1
chr1	17618489	CCCT	C	CODON_CHANGE_PLUS_CODON_DELETION	MODERATE	ARHGEF10L		chr1	17618489	.	CCCT	C	.	normal_artifact;slippage;weak_evidence	.	93	199	1	CODON_CHANGE_PLUS_CODON_DELETION(MODERATE||tcctct/tct|SS51S|ARHGEF10L|protein_coding|CODING|ENST00000375408|1|INFO_REALIGN_3_PRIME)	ATCCGCTGTC[CCT/-]CCTCCTCCTC	93	37,20	233213	60,60	24	-0.1719	.	18.44	.	.	2.46	.	6,5	CCT	1	STR	23	1	4.55	.	78,2	98,3	0.035	0.038	80	101	37,2	38,1	36,0
chr1	18335044	G	A	INTRON	MODIFIER	IGSF21		chr1	18335044	.	G	A	.	normal_artifact	.	93	398	1	INTRON(MODIFIER||||IGSF21|protein_coding|CODING|ENST00000251296|4)	TGGTGTCTCA[G/A]TGAGGAGGAC	93	20,20	235226	60,60	37	-14.6	.	20.1	.	.	6	.	.	.	93	.	93	.	64.67	.	174,13	168,37	0.069	0.18	187	205	98,2	94,17	73,10
chr1	18631409	T	TC	UPSTREAM	MODIFIER	PAX7		chr1	18631409	.	T	TC	.	normal_artifact	.	93	43	1	UPSTREAM(MODIFIER||111||PAX7|protein_coding|CODING|ENST00000420770|)	TCACCCCCCT[-/C]CCCCAGCTTC	35	37,37	239297	60,60	29	-0.646	.	2.71	.	.	6	.	4,5	C	13	STR	8	93	7.75	.	19,1	19,4	0.091	0.202	20	23	11,1	8,0	8,0
chr1	18676453	G	A	INTRON	MODIFIER	PAX7		chr1	18676453	.	G	A	.	weak_evidence	.	93	21	1	INTRON(MODIFIER||||PAX7|protein_coding|CODING|ENST00000375375|4)	TCGCTGCCCA[G/A]CGACCAGCCG	37	37,28	208,93	60,60	71	1	.	2.71	.	.	6	.	.	.	1	.	10	.	3.62	.	9,0	10,2	0.091	0.214	9	12	5,0	5,0	4,0
chr1	18744685	GATAA	G	INTRON	MODIFIER	PAX7		chr1	18744685	.	GATAA	G	.	germline;normal_artifact	.	93	83	1	INTRON(MODIFIER||||PAX7|protein_coding|CODING|ENST00000420770|8|INFO_REALIGN_3_PRIME)	GGATGGATGG[ATAA/-]ATGGATGGAT	1	38,37	241263	60,60	60	-1.385	.	5.11	.	.	0.78	.	.	.	93	.	52	.	18.47	.	31,1	15,6	0.054	0.302	32	21	13,1	5,4	13,0
chr1	18840413	A	G	NON_SYNONYMOUS_CODING	MODERATE	TAS1R2		chr1	18840413	.	A	G	.	PASS	.	93	469	1	NON_SYNONYMOUS_CODING(MODERATE|MISSENSE|gTg/gCg|V569A|TAS1R2|protein_coding|CODING|ENST00000375371|6)	CAGCAGGGCC[A/G]CAGCGATGGT	93	30,20	238245	60,60	48	2.36	.	67.71	.	.	6	.	.	.	93	.	67	.	30.62	.	226,0	210,19	0.004321	0.085	226	229	98,0	104,14	125,0
chr1	18855099	G	T	INTRON	MODIFIER	TAS1R2		chr1	18855099	.	G	T	.	normal_artifact	.	93	72	1	INTRON(MODIFIER||||TAS1R2|protein_coding|CODING|ENST00000375371|2)	AGCCACCCCA[G/T]GGGTAGGTGG	93	36,26	265281	60,60	37	0.459	.	6.25	.	.	6	.	.	.	37	.	28	.	8.86	.	28,1	31,5	0.061	0.156	29	36	14,1	14,3	14,0
chr1	18896892	CAA	C,CAAA	DOWNSTREAM	MODIFIER	MIR1290		chr1	18896892	.	CAA	C,CAAA	.	germline;normal_artifact	.	93	105	1	DOWNSTREAM(MODIFIER||178||MIR1290|miRNA|NON_CODING|ENST00000408735|)	ACGATGTCTC[AA/-]AAAAAAAAAA	1	37,27,38	245226250	60,60,60	25,32	-7.178e+00,1.13	.	-1.455e+01,12.13	.	.	3.06,6.00	.	14,12,15	A	93	STR	93	93	27.53,3.15	.	19,9,1	25,16,4	0.312,0.023	0.353,0.094	29	45	3,5,0	10,8,3	13,4,1
chr1	18956231	CCCG	C	CODON_CHANGE_PLUS_CODON_DELETION	MODERATE	IFFO2		chr1	18956231	.	CCCG	C	.	slippage;strand_bias;weak_evidence	.	93	469	1	CODON_CHANGE_PLUS_CODON_DELETION(MODERATE||ggcggg/ggg|GG33G|IFFO2|protein_coding|CODING|ENST00000455833|1)	CGGCCCTGCC[CCG/-]CCGCCGCCGC	93	20,20	231228	60,60	53	1.28	.	55.32	.	.	3.1	.	5,4	CCG	1	STR	1	1	4.15	.	198,2	205,3	0.011	0.019	200	208	97,0	93,0	99,2
chr1	19147106	A	C	UPSTREAM	MODIFIER	UBR4		chr1	19147106	.	A	C	.	base_qual;strand_bias	.	93	126	1	UPSTREAM(MODIFIER||978||UBR4|processed_transcript|CODING|ENST00000465036|)	ACCTCCTCTC[A/C]AGAGAACAGG	93	20,16	235207	60,60	42	1.74	.	15.84	.	.	6	.	.	.	9	.	1	.	6	.	53,0	60,8	0.018	0.092	53	68	34,0	27,0	18,0
chr1	19187076	TTATA	T,TTA,TTATATA	INTRON	MODIFIER	UBR4		chr1	19187076	.	TTATA	T,TTA,TTATATA	.	germline;multiallelic;normal_artifact	.	93	118	1	INTRON(MODIFIER||||UBR4|protein_coding|CODING|ENST00000375254|13)	AAGAAAGTTT[TATA/-]TATATATATA	1	33,33,33,34	245243253244	60,60,60,60	43,35,25	-1.038e+00,-4.931e+01,-8.807e-01	.	3.88,-5.028e+01,9.17	.	.	2.47,0.243,1.41	.	10,8,9,11	TA	93	STR	93	93	5.02,74.59,4.79	.	22,1,22,1	23,5,31,4	0.037,0.462,0.039	0.086,0.483,0.072	46	63	14,1,9,0	12,1,16,2	7,0,12,1
chr1	19192098	C	T	INTRON	MODIFIER	UBR4		chr1	19192098	.	C	T	.	PASS	.	93	86	1	INTRON(MODIFIER||||UBR4|protein_coding|CODING|ENST00000375254|11)	GCAAATTTTC[C/T]TATTGATATG	93	36,37	239215	60,60	19	1.58	.	11.08	.	.	6	.	.	.	46	.	23	.	9.77	.	37,0	42,5	0.026	0.122	37	47	17,0	16,4	19,0
chr1	19268764	C	CA	DOWNSTREAM	MODIFIER	AKR7L		chr1	19268764	.	C	CA	.	normal_artifact	.	93	456	1	DOWNSTREAM(MODIFIER||1768||AKR7L|retained_intron|CODING|ENST00000493176|)	AGCCACAACC[-/A]AAAGAGCCAT	93	20,20	232241	60,60	44	-17.57	.	17.97	.	.	6	.	3,4	A	77	STR	93	93	14.01	.	189,16	206,24	0.073	0.086	205	230	90,8	113,15	98,7
chr1	19304435	T	C	DOWNSTREAM	MODIFIER	AKR7A2		chr1	19304435	.	T	C	.	normal_artifact;strand_bias	.	93	210	1	DOWNSTREAM(MODIFIER||3304||AKR7A2|retained_intron|CODING|ENST00000492217|)	GCACAGCGAC[T/C]CCACTCACAG	93	34,38	266265	60,60	45	-11.43	.	8.48	.	.	6	.	.	.	62	.	1	.	11.37	.	94,5	96,5	0.059	0.058	99	101	60,3	45,2	34,2
chr1	19608323	G	A	INTRON	MODIFIER	MINOS1		chr1	19608323	.	G	A	.	clustered_events	.	93	759	3	INTRON(MODIFIER||||MINOS1|protein_coding|CODING|ENST00000322753|1)	ATGAATCCTC[G/A]CCATATGCTG	93	29,25	241257	60,40	18	2.55	.	106.86	.	.	4.61	.	.	.	23	.	11	.	8.96	.	355,0	399,5	0.002801	0.015	355	404	167,0	189,4	163,0
chr1	19608342	A	G	INTRON	MODIFIER	MINOS1		chr1	19608342	.	A	G	.	clustered_events;haplotype	.	93	767	3	INTRON(MODIFIER||||MINOS1|protein_coding|CODING|ENST00000322753|1)	TGCTATGTTG[A/G]CCACCCAGGA	93	31,37	243257	60,40	23	2.55	.	106.24	.	.	6	.	.	.	23	.	11	.	8.95	.	353,0	400,5	0.002803	0.015	353	405	185,0	195,3	161,0
chr1	19608344	CA	TG	INTRON	MODIFIER	MINOS1		chr1	19608344	.	CA	TG	.	clustered_events;haplotype;weak_evidence	.	93	767	3	INTRON(MODIFIER||||MINOS1|protein_coding|CODING|ENST00000322753|1)	CTATGTTGAC[CA/TG]CCCAGGATGT	93	35,33	243249	60,34	23	2.55	.	106.54	.	.	6	.	.	.	2	.	4	.	6.35	.	354,0	401,4	0.002802	0.012	354	405	185,0	198,3	159,0
chr1	20345624	TG	T	INTRON	MODIFIER	VWA5B1		chr1	20345624	.	TG	T	.	normal_artifact;weak_evidence	.	93	104	1	INTRON(MODIFIER||||VWA5B1|processed_transcript|CODING|ENST00000525343|6|INFO_REALIGN_3_PRIME)	GGGCACTCCT[G/-]GGGGCCAAGC	93	32,34	248238	60,60	27	-0.2982	.	10.14	.	.	6	.	5,4	G	1	STR	4	93	4.26	.	52,3	36,3	0.053	0.098	55	39	16,1	21,0	36,2
chr1	20568460	C	T	INTERGENIC	MODIFIER			chr1	20568460	.	C	T	.	weak_evidence	.	93	16	1	INTERGENIC(MODIFIER||||||||)	TTAACTCCCA[C/T]GTATGAGTGA	25	20,32	228246	60,60	27	1.04	.	2.96	.	.	6	.	.	.	1	.	32	.	4.56	.	10,0	3,2	0.084	0.446	10	5	6,0	1,0	3,0
chr1	20685897	C	T	UPSTREAM	MODIFIER	KIF17		chr1	20685897	.	C	T	.	normal_artifact	.	93	197	1	UPSTREAM(MODIFIER||710||KIF17|processed_transcript|CODING|ENST00000477167|)	TGCCTGGCCA[C/T]GGGCCACAAG	93	30,20	236215	60,60	28	-9.116	.	5.6	.	.	3.49	.	.	.	34	.	27	.	8.56	.	81,7	97,7	0.087	0.074	88	104	41,2	48,4	39,5
chr1	20726966	C	A	INTRON	MODIFIER	SH2D5		chr1	20726966	.	C	A	.	normal_artifact	.	93	454	1	INTRON(MODIFIER||||SH2D5|protein_coding|CODING|ENST00000444387|4)	ACCTGTACCC[C/A]TCCAGTCCTC	93	20,32	230262	60,60	47	-25.37	.	12.34	.	.	6	.	.	.	93	.	93	.	42.58	.	193,15	205,25	0.075	0.109	208	230	111,6	97,14	80,9
chr1	20891471	GA	G	DOWNSTREAM	MODIFIER	EIF4G3		chr1	20891471	.	GA	G	.	slippage;weak_evidence	.	93	19	1	DOWNSTREAM(MODIFIER||1639||EIF4G3|retained_intron|CODING|ENST00000374933|)	AATAATACTG[A/-]AAAAAAAGGT	18	20,37	219340	60,60	31	0.982	.	2.25	.	.	6	.	8,7	A	1	STR	34	1	3.78	.	8,0	6,2	0.096	0.318	8	8	4,0	6,2	4,0
chr1	21298925	G	A	INTRON	MODIFIER	ECE1		chr1	21298925	.	G	A	.	PASS	.	93	175	1	INTRON(MODIFIER||||ECE1|protein_coding|CODING|ENST00000415912|1)	CCAGAAAGCA[G/A]CTGGTCCTGA	93	38,32	254270	60,60	42	1.63	.	25.04	.	.	6	.	.	.	74	.	3	.	12.54	.	84,0	80,7	0.012	0.09	84	87	39,0	39,1	40,0
chr1	21426337	C	T	UPSTREAM	MODIFIER	HS6ST1P1		chr1	21426337	.	C	T	.	map_qual;normal_artifact;strand_bias	.	93	532	1	UPSTREAM(MODIFIER||1966||HS6ST1P1|processed_pseudogene|NON_CODING|ENST00000481504|)	TGAAAGGAGT[C/T]GAATACCATC	93	20,34	228222	48,27	32	-30.25	.	16.57	.	.	0.839	.	.	.	93	.	2	.	36.15	.	240,19	232,22	0.076	0.089	259	254	121,5	99,8	112,14
chr1	21483357	T	C	NON_SYNONYMOUS_CODING	MODERATE	NBPF3		chr1	21483357	.	T	C	.	normal_artifact;strand_bias	.	93	150	1	NON_SYNONYMOUS_CODING(MODERATE|MISSENSE|Ttc/Ctc|F625L|NBPF3|protein_coding|CODING|ENST00000318249|15)	CCACCTGGCC[T/C]TCCAGATGGG	93	33,38	247317	27,40	56	-3.331	.	13.45	.	.	1.57	.	.	.	70	.	1	.	12.13	.	72,2	66,6	0.039	0.094	74	72	38,0	36,2	32,2
chr1	21603937	CAG	C	INTRON	MODIFIER	RAP1GAP		chr1	21603937	.	CAG	C	.	normal_artifact;slippage	.	93	367	1	INTRON(MODIFIER||||RAP1GAP|protein_coding|CODING|ENST00000374763|15)	GGGCGGGGGC[AG/-]AGAGAGAGAG	93	37,20	242244	60,60	31	-4.341	.	28.81	.	.	2.43	.	6,5	AG	6	STR	73	1	7.29	.	149,7	153,9	0.044	0.055	156	162	66,3	79,7	75,4
chr1	21757663	CT	C	FRAME_SHIFT	HIGH	USP48		chr1	21757663	.	CT	C	.	normal_artifact;weak_evidence	.	93	257	1	FRAME_SHIFT(HIGH||aag/|K85|USP48|protein_coding|CODING|ENST00000529637|2)	ATGGTTTACC[T/-]TTTTTCTCCT	93	20,37	231247	60,60	39	-10.65	.	7.54	.	.	6	.	6,5	T	1	STR	34	93	3.92	.	103,9	131,5	0.083	0.04	112	136	48,6	61,1	53,3
chr1	21791176	A	G	INTERGENIC	MODIFIER			chr1	21791176	.	A	G	.	weak_evidence	.	93	12	1	INTERGENIC(MODIFIER||||||||)	AGCCTTGCCA[A/G]CGTGGGGAAA	17	20,20	220169	60,60	62	0.954	.	2.4	.	.	6	.	.	.	1	.	35	.	4.4	.	8,0	2,2	0.1	0.5	8	4	2,0	1,0	6,0
chr1	21814452	G	A	NON_SYNONYMOUS_CODING	MODERATE	LDLRAD2		chr1	21814452	.	G	A	.	normal_artifact	.	93	975	1	NON_SYNONYMOUS_CODING(MODERATE|MISSENSE|cGc/cAc|R47H|LDLRAD2|protein_coding|CODING|ENST00000543870|2)	CTGCTGCTGC[G/A]CTCGCACGCC	93	29,31	229231	60,60	38	-63.09	.	16.66	.	.	6	.	.	.	93	.	63	.	30.06	.	422,38	472,22	0.083	0.045	460	494	203,21	234,13	209,17
chr1	21859988	G	A	SYNONYMOUS_CODING	LOW	HSPG2		chr1	21859988	.	G	A	.	normal_artifact	.	93	875	1	SYNONYMOUS_CODING(LOW|SILENT|Ctg/Ttg|L1677|HSPG2|protein_coding|CODING|ENST00000374695|41)	TCGACCACCA[G/A]TGGGGCTTGG	93	35,32	235220	60,60	33	-0.3687	.	106.49	.	.	6	.	.	.	93	.	63	.	47.98	.	390,4	421,32	0.011	0.066	394	453	188,3	205,12	195,0
chr1	21874592	G	A	DOWNSTREAM	MODIFIER	HSPG2		chr1	21874592	.	G	A	.	normal_artifact	.	93	336	1	DOWNSTREAM(MODIFIER||2922||HSPG2|retained_intron|CODING|ENST00000480900|)	TTGCTGGGGT[G/A]GGCGGAAGGA	93	36,21	237213	60,60	35	-10.47	.	19.93	.	.	6	.	.	.	93	.	93	.	36.12	.	148,10	147,20	0.063	0.123	158	167	84,3	88,10	62,5
chr1	22002726	C	T	INTRON	MODIFIER	CELA3A		chr1	22002726	.	C	T	.	map_qual;normal_artifact;strand_bias	.	93	944	1	INTRON(MODIFIER||||CELA3A|protein_coding|CODING|ENST00000290122|1)	GAGGGCTCAT[C/T]GAGGGCCAGG	93	20,33	233225	57,27	13	-62.77	.	15.35	.	.	2.89	.	.	.	93	.	1	.	62.66	.	420,39	402,39	0.086	0.09	459	441	203,20	194,17	205,19
chr1	22005790	C	T	NON_SYNONYMOUS_CODING	MODERATE	CELA3A		chr1	22005790	.	C	T	.	PASS	.	93	41	1	NON_SYNONYMOUS_CODING(MODERATE|MISSENSE|gCc/gTc|A119V|CELA3A|protein_coding|CODING|ENST00000290122|4)	TCGTGTGTGG[C/T]CTGTGGGTGA	63	37,32	265251	60,60	51	1.24	.	4.82	.	.	6	.	.	.	47	.	31	.	10.11	.	16,0	19,5	0.054	0.23	16	24	8,0	13,5	8,0
chr1	22164379	G	T	INTERGENIC	MODIFIER			chr1	22164379	.	G	T	.	weak_evidence	.	93	14	1	INTERGENIC(MODIFIER||||||||)	TCTGTCTGGG[G/T]CTTCATTCTC	23	20,20	231161	60,60	56	1.04	.	3	.	.	6	.	.	.	1	.	35	.	3.45	.	10,0	2,2	0.083	0.518	10	4	9,0	1,2	1,0
chr1	22508201	TAC	T	DOWNSTREAM	MODIFIER	ZBTB40		chr1	22508201	.	TAC	T	.	normal_artifact;slippage	.	93	112	1	DOWNSTREAM(MODIFIER||1961||ZBTB40|protein_coding|CODING|ENST00000400239||WARNING_TRANSCRIPT_INCOMPLETE)	AAATATGAAT[AC/-]ACACACACAT	93	20,20	242210	60,60	23	0.503	.	9.66	.	.	3.61	.	5,4	AC	12	STR	50	1	8.02	.	44,2	46,5	0.055	0.111	46	51	17,1	25,3	19,0
chr1	22595720	G	T	INTRON	MODIFIER	EPHA8		chr1	22595720	.	G	T	.	weak_evidence	.	93	13	1	INTRON(MODIFIER||||EPHA8|protein_coding|CODING|ENST00000166244|8)	TCTAACTGAT[G/T]GAGAAATGGA	19	20,20	226252	60,60	24	0.954	.	2.4	.	.	6	.	.	.	1	.	32	.	3.11	.	8,0	3,2	0.1	0.428	8	5	4,0	1,2	4,0
chr1	22597885	TC	T	INTRON	MODIFIER	EPHA8		chr1	22597885	.	TC	T	.	normal_artifact	.	93	565	1	INTRON(MODIFIER||||EPHA8|protein_coding|CODING|ENST00000166244|11|INFO_REALIGN_3_PRIME)	AAGACAGCCT[C/-]CCCCTGCAGT	93	22,32	230234	60,60	43	-10.12	.	39.06	.	.	6	.	5,4	C	93	STR	93	93	43.91	.	245,18	226,34	0.054	0.124	263	260	131,10	123,15	112,8
chr1	22906122	T	C	INTRON	MODIFIER	EPHB2		chr1	22906122	.	T	C	.	normal_artifact	.	93	417	1	INTRON(MODIFIER||||EPHB2|protein_coding|CODING|ENST00000400191|10)	AGGTGGCTGG[T/C]ACTCTCACAT	93	20,20	234228	60,60	32	-18.07	.	15.21	.	.	6	.	.	.	93	.	64	.	25.11	.	176,15	198,16	0.081	0.077	191	214	77,7	99,6	95,8
chr1	23030581	C	T	NON_SYNONYMOUS_CODING	MODERATE	KDM1A		chr1	23030581	.	C	T	.	normal_artifact	.	93	158	1	NON_SYNONYMOUS_CODING(MODERATE|MISSENSE|cCc/cTc|P155L|KDM1A|protein_coding|CODING|ENST00000400181|2)	CCCCCACCAC[C/T]CCCTCAAGCC	93	20,20	228231	60,60	32	-5.258	.	6.03	.	.	6	.	.	.	48	.	37	.	9.94	.	62,5	77,8	0.085	0.09	67	85	26,5	28,3	34,0
chr1	23094185	C	T	NON_SYNONYMOUS_CODING	MODERATE	LUZP1		chr1	23094185	.	C	T	.	normal_artifact	.	93	463	1	NON_SYNONYMOUS_CODING(MODERATE|MISSENSE|cGc/cAc|R26H|LUZP1|protein_coding|CODING|ENST00000314174|2)	CTCATCAAGG[C/T]GGCGGCTTAG	93	29,31	242219	60,60	38	-29.45	.	8.42	.	.	6	.	.	.	93	.	93	.	61.62	.	200,17	200,34	0.081	0.147	217	234	113,8	111,13	80,9
chr1	23193599	G	A	SYNONYMOUS_CODING	LOW	HTR1D		chr1	23193599	.	G	A	.	PASS	.	93	458	1	SYNONYMOUS_CODING(LOW|SILENT|taC/taT|Y207|HTR1D|protein_coding|CODING|ENST00000374619|1)	CCGAGGGAAT[G/A]TAGAAGGCCC	93	36,31	237241	60,60	31	2.34	.	64.51	.	.	6	.	.	.	93	.	93	.	54.22	.	215,0	197,29	0.004551	0.129	215	226	103,0	98,17	110,0
chr1	23310381	A	AT	UTR_3_PRIME	MODIFIER	HNRNPR		chr1	23310381	.	A	AT	.	normal_artifact;slippage;weak_evidence	.	93	76	1	UTR_3_PRIME(MODIFIER||72||HNRNPR|protein_coding|CODING|ENST00000374616|11)	GTTAAGCCAA[-/T]TTTTTTTTTT	65	35,35	282299	60,60	19	-1.214	.	6.57	.	.	2.1	.	11,12	T	1	STR	7	1	3.26	.	38,2	32,4	0.07	0.119	40	36	19,2	12,3	18,0
chr1	23581739	T	C	INTRON	MODIFIER	MDS2		chr1	23581739	.	T	C	.	normal_artifact;weak_evidence	.	93	85	1	INTRON(MODIFIER||||MDS2|processed_transcript|CODING|ENST00000477916|1)	TTCTTTTTTT[T/C]TTTTTTTTTT	93	34,33	268267	60,60	42	-0.03048	.	5.13	.	.	6	.	.	.	1	.	25	.	3.01	.	25,1	33,5	0.067	0.123	26	38	6,0	15,3	18,1
chr1	23627048	GGA	G	UPSTREAM	MODIFIER	MDS2		chr1	23627048	.	GGA	G	.	normal_artifact;slippage;weak_evidence	.	93	312	1	UPSTREAM(MODIFIER||285||MDS2|protein_coding|CODING|ENST00000374555|)	AAAGGGAGGG[GA/-]GAGAGAGAGA	93	36,37	233246	60,60	40	-5.316	.	23.05	.	.	3.91	.	7,6	GA	1	STR	35	1	4.5	.	122,4	150,5	0.039	0.034	126	155	62,2	72,4	55,1
chr1	23652457	T	C	INTERGENIC	MODIFIER			chr1	23652457	.	T	C	.	weak_evidence	.	93	15	1	INTERGENIC(MODIFIER||||||||)	GGATAATGAC[T/C]GGGAGGAGAA	25	20,20	214235	60,60	32	1.04	.	2.96	.	.	6	.	.	.	1	.	32	.	3.15	.	10,0	3,2	0.084	0.428	10	5	5,0	0,0	4,0
chr1	23743534	G	A	NON_SYNONYMOUS_CODING	MODERATE	TCEB3		chr1	23743534	.	G	A	.	normal_artifact	.	93	356	1	NON_SYNONYMOUS_CODING(MODERATE|MISSENSE|Gag/Aag|E37K|TCEB3|protein_coding|CODING|ENST00000418390|1)	CCAAGTTGTG[G/A]AGAAGCTGCA	93	20,20	212209	60,60	37	-18.08	.	7.94	.	.	6	.	.	.	93	.	93	.	28.88	.	145,14	165,22	0.091	0.117	159	187	83,3	77,13	61,11
chr1	23756942	C	A	DOWNSTREAM	MODIFIER	TCEB3-AS1		chr1	23756942	.	C	A	.	normal_artifact;weak_evidence	.	93	40	1	DOWNSTREAM(MODIFIER||3440||TCEB3-AS1|antisense|NON_CODING|ENST00000427796|)	CAGTGTTGTC[C/A]TGTGTTGCAG	75	36,33	244272	60,60	7	0.929	.	2.61	.	.	6	.	.	.	1	.	6	.	3.52	.	11,1	26,2	0.101	0.1	12	28	2,0	12,0	9,0
chr1	23794462	CCA	C	FRAME_SHIFT	HIGH	LYPLA2		chr1	23794462	.	CCA	C	.	PASS	.	93	665	1	FRAME_SHIFT(HIGH||cag/|Q170|LYPLA2|protein_coding|CODING|ENST00000374514|9)	GGCCATACTC[CA/-]GTGCCATGGG	93	37,30	236242	60,60	38	2.51	.	97.16	.	.	6	.	.	.	93	.	93	.	95.14	.	323,0	297,38	0.003066	0.113	323	335	167,0	142,14	143,0
chr1	23961703	G	C	NON_SYNONYMOUS_CODING	MODERATE	PNRC2		chr1	23961703	.	G	C	.	map_qual;normal_artifact;weak_evidence	.	93	162	1	NON_SYNONYMOUS_CODING(MODERATE|MISSENSE|agG/agC|R82S|PNRC2|protein_coding|CODING|ENST00000334351|3)	CAGGTCCCAG[G/C]TTACTTTTTA	93	28,37	236199	60,27	32	0.652	.	21.34	.	.	3.82	.	.	.	2	.	12	.	4.83	.	82,1	69,4	0.023	0.067	83	73	41,1	24,2	32,0
chr1	24092404	A	C	INTRON	MODIFIER	MYOM3		chr1	24092404	.	A	C	.	base_qual;weak_evidence	.	93	37	1	INTRON(MODIFIER||||MYOM3|protein_coding|CODING|ENST00000374434|10)	TCCTCTTCTC[A/C]TCCATCCTCC	51	31,17	270307	60,60	28	1.23	.	4.72	.	.	6	.	.	.	1	.	12	.	4.52	.	16,0	14,5	0.056	0.25	16	19	7,0	8,0	7,0
chr1	24180675	AG	CC	INTRON	MODIFIER	IFNLR1		chr1	24180675	.	AG	CC	.	base_qual;clustered_events;haplotype;normal_artifact;strand_bias	.	93	184	4	INTRON(MODIFIER||||IFNLR1|protein_coding|CODING|ENST00000327535|2)	AAGCCCCTCC[AG/CC]CCCCCACCCA	93	37,10	234240	60,60	12	-7.459	.	7.53	.	.	6	.	.	.	93	.	1	.	22.38	.	75,5	89,10	0.064	0.107	80	99	22,2	39,3	45,0
chr1	24180682	A	C	INTRON	MODIFIER	IFNLR1		chr1	24180682	.	A	C	.	clustered_events;haplotype;normal_artifact;strand_bias	.	93	198	4	INTRON(MODIFIER||||IFNLR1|protein_coding|CODING|ENST00000327535|2)	TCCAGCCCCC[A/C]CCCACCCCCT	93	31,35	230240	60,60	5	-7.221	.	10.24	.	.	1.82	.	.	.	93	.	1	.	21.91	.	84,5	99,10	0.058	0.098	89	109	31,3	34,5	49,2
chr1	24180686	A	C	INTRON	MODIFIER	IFNLR1		chr1	24180686	.	A	C	.	clustered_events;haplotype;normal_artifact;strand_bias	.	93	205	4	INTRON(MODIFIER||||IFNLR1|protein_coding|CODING|ENST00000327535|2)	GCCCCCACCC[A/C]CCCCCTCAGT	93	31,25	229243	60,60	4	-6.994	.	12.05	.	.	1.92	.	.	.	93	.	1	.	20.87	.	87,4	105,9	0.053	0.086	91	114	29,3	39,4	50,0
chr1	24180692	T	C	INTRON	MODIFIER	IFNLR1		chr1	24180692	.	T	C	.	clustered_events;haplotype;normal_artifact;strand_bias	.	93	219	4	INTRON(MODIFIER||||IFNLR1|protein_coding|CODING|ENST00000327535|2)	ACCCACCCCC[T/C]CAGTCTTCCC	93	33,28	230246	60,60	2	-3.408	.	18.47	.	.	2.13	.	.	.	47	.	1	.	9.99	.	89,2	113,5	0.032	0.05	91	118	28,0	48,3	55,0
chr1	24279218	C	A	INTERGENIC	MODIFIER			chr1	24279218	.	C	A	.	weak_evidence	.	93	14	1	INTERGENIC(MODIFIER||||||||)	GAGGCTGAGG[C/A]AGGTGGATCA	22	29,20	245150	60,60	67	1	.	2.7	.	.	6	.	.	.	1	.	32	.	3.15	.	9,0	3,2	0.091	0.428	9	5	3,0	1,0	6,0
chr1	24358427	AC	A	UTR_3_PRIME	MODIFIER	STPG1		chr1	24358427	.	AC	A	.	normal_artifact	.	93	514	1	UTR_3_PRIME(MODIFIER||115||STPG1|protein_coding|CODING|ENST00000374409|9)	GGTAGAGCCA[C/-]CCCCCAAGTT	93	31,30	240235	60,60	40	-22.54	.	21.21	.	.	3.91	.	6,5	C	49	STR	93	93	10.58	.	249,27	201,12	0.083	0.051	276	213	108,15	89,6	132,12
chr1	24449551	A	C	SYNONYMOUS_CODING	LOW	NIPAL3		chr1	24449551	.	A	C	.	normal_artifact	.	93	258	1	SYNONYMOUS_CODING(LOW|SILENT|gcA/gcC|A155|NIPAL3|protein_coding|CODING|ENST00000374399|6)	TGACATTCGC[A/C]CCCAACAGTC	93	31,37	233270	60,60	36	-6.015	.	20.46	.	.	6	.	.	.	93	.	18	.	20.49	.	116,5	122,10	0.042	0.082	121	132	55,2	65,5	60,2
chr1	24868846	T	C	INTERGENIC	MODIFIER			chr1	24868846	.	T	C	.	weak_evidence	.	93	16	1	INTERGENIC(MODIFIER||||||||)	GCAAAACTGA[T/C]GATGCATATT	28	32,20	239162	60,60	67	1.08	.	3.3	.	.	6	.	.	.	1	.	32	.	3.17	.	11,0	3,2	0.077	0.427	11	5	6,0	2,0	5,0
chr1	25228342	AT	A	DOWNSTREAM	MODIFIER	SYF2		chr1	25228342	.	AT	A	.	germline;weak_evidence	.	93	18	1	DOWNSTREAM(MODIFIER||1966||SYF2|processed_transcript|CODING|ENST00000476231|)	TTTAATAGTA[T/-]TTTTTTAGTT	1	32,32	239307	60,60	53	0.954	.	2.41	.	.	3.18	.	7,6	T	1	STR	11	93	3.66	.	8,0	7,2	0.1	0.271	8	9	4,0	5,1	4,0
chr1	25246385	C	T	UPSTREAM	MODIFIER	RSRP1		chr1	25246385	.	C	T	.	normal_artifact	.	93	422	1	UPSTREAM(MODIFIER||2280||RSRP1|processed_transcript|CODING|ENST00000569495|)	GGTTCCCTAG[C/T]CTACTCATAT	93	37,31	242248	60,60	40	-10.42	.	34.56	.	.	6	.	.	.	93	.	66	.	32.21	.	192,7	196,20	0.04	0.095	199	216	111,4	90,9	77,3
chr1	25272713	A	C	UPSTREAM	MODIFIER	RSRP1		chr1	25272713	.	A	C	.	map_qual;normal_artifact;strand_bias	.	93	333	1	UPSTREAM(MODIFIER||4828||RSRP1|processed_transcript|CODING|ENST00000450820|)	TTCATTGGAA[A/C]AGTGGTCACA	93	33,39	238224	60,27	17	-21.93	.	7.66	.	.	1.89	.	.	.	93	.	1	.	14.63	.	160,14	138,10	0.085	0.073	174	148	71,8	72,4	81,6
chr1	25390796	C	T	NON_SYNONYMOUS_CODING	MODERATE	RHCE		chr1	25390796	.	C	T	.	normal_artifact	.	93	759	1	NON_SYNONYMOUS_CODING(MODERATE|MISSENSE|Gcc/Acc|A252T|RHCE|protein_coding|CODING|ENST00000294413|5)	CCTGAGATGG[C/T]TGTCACCACA	93	36,30	235234	60,60	44	-38.95	.	23.78	.	.	6	.	.	.	93	.	73	.	38.62	.	323,27	357,25	0.077	0.067	350	382	157,15	171,13	162,11
chr1	25553770	CAAAAA	C,CA,CAA,CAAA,CAAAA,CAAAAAA	UPSTREAM	MODIFIER	LDLRAP1		chr1	25553770	.	CAAAAA	C,CA,CAA,CAAA,CAAAA,CAAAAAA	.	germline;multiallelic;normal_artifact	.	93	125	1	UPSTREAM(MODIFIER||1110||LDLRAP1|processed_transcript|CODING|ENST00000462394|)	ACTCAGTCTC[AAAAA/-]AAAAAAAAAA	1	38,38,38,38,38,38,38	2.52281e+20	60,60,60,60,60,60,60	29,26,20,42,43,18	-9.183e+00,-3.095e+01,-1.063e+01,-3.369e+00,-4.817e+00,-1.574e+00	.	-6.771e+01,-1.019e+02,-7.420e+01,-4.116e+01,-1.737e+01,2.33	.	.	3.17,2.17,0.854,6.00,1.77,6.00	.	19,14,15,16,17,18,20	A	93	STR	93	93	15.02,26.86,6.81,3.36,7.61,3.19	.	10,9,18,9,4,5,3	14,10,16,6,4,7,5	0.141,0.312,0.151,0.072,0.091,0.057	0.154,0.249,0.099,0.069,0.121,0.085	58	62	6,4,10,6,2,3,2	5,8,8,5,2,4,5	4,5,7,2,2,2,1
chr1	25563140	CT	C	FRAME_SHIFT	HIGH	LDLRAP1		chr1	25563140	.	CT	C	.	normal_artifact	.	93	305	1	FRAME_SHIFT(HIGH||tcc/|S202|LDLRAP1|protein_coding|CODING|ENST00000374338|6)	CTGCACCCCC[T/-]CCTTGAAGAG	93	35,36	234227	60,60	31	-3.005	.	21.28	.	.	6	.	.	.	93	.	81	.	18.72	.	128,11	132,15	0.055	0.103	139	147	63,6	68,8	62,5
chr1	25618095	G	A	NON_SYNONYMOUS_CODING	MODERATE	MAN1C1		chr1	25618095	.	G	A	.	normal_artifact	.	93	406	1	NON_SYNONYMOUS_CODING(MODERATE|MISSENSE|Gcc/Acc|A100T|MAN1C1|protein_coding|CODING|ENST00000374332|1)	CAGCAGCTGG[G/A]CCAGTCCCCG	93	37,31	254219	60,60	54	-7.151	.	35.82	.	.	6	.	.	.	93	.	81	.	33.94	.	176,5	190,19	0.033	0.094	181	209	88,5	88,11	88,0
chr1	25982385	G	A	SYNONYMOUS_CODING	LOW	PAFAH2		chr1	25982385	.	G	A	.	normal_artifact	.	93	224	1	SYNONYMOUS_CODING(LOW|SILENT|ggC/ggT|G215|PAFAH2|protein_coding|CODING|ENST00000374282|7)	TCAGATCCAA[G/A]CCACCAGGCA	93	20,20	233214	60,60	43	-3.957	.	17.73	.	.	6	.	.	.	91	.	48	.	14.3	.	101,5	102,11	0.053	0.103	106	113	39,3	42,8	57,2
chr1	26345479	CT	C	FRAME_SHIFT	HIGH	AIM1L		chr1	26345479	.	CT	C	.	slippage	.	93	290	1	FRAME_SHIFT(HIGH||aag/|K393|AIM1L|protein_coding|CODING|ENST00000308182|2)	GGGCCCGTCC[T/-]TTTTTTTAGG	93	35,36	244254	60,60	40	1.13	.	34.41	.	.	6	.	8,7	T	53	STR	74	1	11.05	.	129,1	124,11	0.015	0.079	130	135	62,1	61,5	62,0
chr1	26447629	TG	T	DOWNSTREAM	MODIFIER	DHDDS		chr1	26447629	.	TG	T	.	normal_artifact	.	93	247	1	DOWNSTREAM(MODIFIER||4550||DHDDS|retained_intron|CODING|ENST00000374186|)	GAGATGGCCT[G/-]GGGGGTGGAG	93	20,28	230239	60,60	42	-12.82	.	3.71	.	.	6	.	6,5	G	29	STR	58	93	8.69	.	99,10	118,10	0.094	0.073	109	128	56,5	66,4	40,5
chr1	26503002	G	T	INTERGENIC	MODIFIER			chr1	26503002	.	G	T	.	clustered_events;haplotype	.	93	14	3	INTERGENIC(MODIFIER||||||||)	TCAGCCTCCC[G/T]AGTAGCTGGA	21	30,20	250194	60,60	31	0.954	.	2.41	.	.	6	.	.	.	12	.	30	.	6.98	.	8,0	4,2	0.1	0.375	8	6	5,0	4,2	3,0
chr1	26503012	A	G	INTERGENIC	MODIFIER			chr1	26503012	.	A	G	.	clustered_events;haplotype	.	93	15	3	INTERGENIC(MODIFIER||||||||)	GAGTAGCTGG[A/G]ACTACAGGCA	23	34,20	254194	60,60	21	0.954	.	2.41	.	.	6	.	.	.	11	.	29	.	6.77	.	8,0	5,2	0.1	0.333	8	7	5,0	5,2	3,0
chr1	26503014	C	T	INTERGENIC	MODIFIER			chr1	26503014	.	C	T	.	clustered_events;haplotype	.	93	16	3	INTERGENIC(MODIFIER||||||||)	GTAGCTGGAA[C/T]TACAGGCATG	26	36,20	256194	60,60	19	1	.	2.71	.	.	6	.	.	.	11	.	29	.	6.77	.	9,0	5,2	0.091	0.333	9	7	5,0	5,2	3,0
chr1	26558819	TC	T	DOWNSTREAM	MODIFIER	RPS6KA1		chr1	26558819	.	TC	T	.	normal_artifact	.	93	373	1	DOWNSTREAM(MODIFIER||1784||RPS6KA1|processed_transcript|CODING|ENST00000488985|)	CCCCAGGCAT[C/-]CCCCCCAGCG	93	31,31	234235	60,60	51	-6.809	.	28.5	.	.	6	.	7,6	C	93	STR	93	93	19.97	.	170,10	163,20	0.049	0.1	180	183	76,6	73,10	87,4
chr1	26773690	CGCA	C	UPSTREAM	MODIFIER	ARID1A		chr1	26773690	.	CGCA	C	.	normal_artifact;slippage;weak_evidence	.	93	758	1	UPSTREAM(MODIFIER||4408||ARID1A|retained_intron|CODING|ENST00000637788|)	GCTACCCCCC[GCA/-]GCAGCAGCAG	93	29,20	240225	60,60	50	-8.786	.	57.56	.	.	4.61	.	8,7	GCA	1	STR	44	1	6.73	.	275,9	364,6	0.034	0.018	284	370	125,2	160,0	136,7
chr1	26780772	TC	T,TCC	DOWNSTREAM	MODIFIER	ARID1A		chr1	26780772	.	TC	T,TCC	.	multiallelic;normal_artifact;slippage	.	93	207	1	DOWNSTREAM(MODIFIER||17||ARID1A|protein_coding|CODING|ENST00000374152|)	TGGGACACCT[C/-]CCCCCCCCGT	93	33,32,34	238227258	60,60,60	33,45	-1.162e+00,-1.634e+01	.	17.88,-5.773e+00	.	.	4.61,6.00	.	9,8,10	C	93	STR	93	1	16.66,7.79	.	75,4,12	66,15,8	0.039,0.137	0.157,0.090	91	89	36,3,3	28,7,2	35,1,9
chr1	26863968	CG	C	UTR_3_PRIME	MODIFIER	SFN		chr1	26863968	.	CG	C	.	clustered_events;haplotype;normal_artifact;strand_bias	.	93	198	7	UTR_3_PRIME(MODIFIER||10||SFN|protein_coding|CODING|ENST00000339276|1)	AGTGTTGCCC[G/-]CCACCGCCCC	93	29,20	245229	60,60	21	-10.37	.	4.9	.	.	6	.	.	.	93	.	1	.	29.82	.	77,5	96,12	0.071	0.114	82	108	30,1	60,8	45,3
chr1	26863972	A	C	UTR_3_PRIME	MODIFIER	SFN		chr1	26863972	.	A	C	.	clustered_events;haplotype;normal_artifact;strand_bias	.	93	188	7	UTR_3_PRIME(MODIFIER||13||SFN|protein_coding|CODING|ENST00000339276|1)	GTTGCCCGCC[A/C]CCGCCCCGCC	93	31,20	245229	60,60	17	-10.38	.	4.95	.	.	6	.	.	.	93	.	1	.	29.93	.	77,5	94,12	0.071	0.116	82	106	31,2	51,8	44,3
chr1	26863975	G	C	UTR_3_PRIME	MODIFIER	SFN		chr1	26863975	.	G	C	.	clustered_events;haplotype;normal_artifact;strand_bias	.	93	182	7	UTR_3_PRIME(MODIFIER||16||SFN|protein_coding|CODING|ENST00000339276|1)	GCCCGCCACC[G/C]CCCCGCCCTG	93	37,20	246229	60,60	14	-10.41	.	4.65	.	.	6	.	.	.	93	.	1	.	30.19	.	76,5	89,12	0.072	0.121	81	101	32,1	52,8	39,3
chr1	26863980	G	C	UTR_3_PRIME	MODIFIER	SFN		chr1	26863980	.	G	C	.	clustered_events;haplotype;normal_artifact;strand_bias	.	93	174	7	UTR_3_PRIME(MODIFIER||21||SFN|protein_coding|CODING|ENST00000339276|1)	CCACCGCCCC[G/C]CCCTGCCCCC	93	37,20	249232	60,60	9	-10.44	.	4.35	.	.	3.4	.	.	.	93	.	1	.	24.29	.	75,5	85,9	0.073	0.104	80	94	30,0	47,5	36,3
chr1	26863983	CTG	C	UTR_3_PRIME	MODIFIER	SFN		chr1	26863983	.	CTG	C	.	clustered_events;haplotype;normal_artifact;strand_bias	.	93	167	7	UTR_3_PRIME(MODIFIER||25||SFN|protein_coding|CODING|ENST00000339276|1)	CGCCCCGCCC[TG/-]CCCCCTCCAG	93	37,20	246233	60,60	7	-8.697	.	6.45	.	.	6	.	.	.	93	.	1	.	24.49	.	73,4	81,9	0.063	0.108	77	90	31,1	46,5	37,2
chr1	26863991	T	C	UTR_3_PRIME	MODIFIER	SFN		chr1	26863991	.	T	C	.	clustered_events;haplotype;normal_artifact;strand_bias	.	93	157	7	UTR_3_PRIME(MODIFIER||32||SFN|protein_coding|CODING|ENST00000339276|1)	CCCTGCCCCC[T/C]CCAGTCCCCC	93	34,20	245231	60,60	1	-3.248	.	12.31	.	.	3.53	.	.	.	93	.	1	.	19.72	.	67,2	81,7	0.042	0.089	69	88	29,0	45,5	35,2
chr1	26863993	CAGT	C	UTR_3_PRIME	MODIFIER	SFN		chr1	26863993	.	CAGT	C	.	clustered_events;haplotype;normal_artifact;strand_bias	.	93	162	7	UTR_3_PRIME(MODIFIER||35||SFN|protein_coding|CODING|ENST00000339276|1)	TGCCCCCTCC[AGT/-]CCCCCACCCT	93	37,20	248231	60,60	1	-3.262	.	11.99	.	.	6	.	.	.	93	.	1	.	19.67	.	66,2	82,7	0.043	0.088	68	89	30,0	44,3	34,2
chr1	26950652	T	A	DOWNSTREAM	MODIFIER	NUDC		chr1	26950652	.	T	A	.	base_qual;normal_artifact;strand_bias;weak_evidence	.	93	137	1	DOWNSTREAM(MODIFIER||3790||NUDC|protein_coding|CODING|ENST00000321265|)	TCCCCCACCC[T/A]CCACACCCCT	93	33,7	227225	60,60	32	0.068	.	9.5	.	.	6	.	.	.	1	.	1	.	4.63	.	49,5	63,11	0.058	0.114	54	74	20,1	23,1	25,0
chr1	27213708	T	C	DOWNSTREAM	MODIFIER	SNRPEP7		chr1	27213708	.	T	C	.	weak_evidence	.	93	14	1	DOWNSTREAM(MODIFIER||2224||SNRPEP7|processed_pseudogene|NON_CODING|ENST00000438350|)	ACCTCATCTC[T/C]ACAAAAACAT	22	20,20	252216	60,60	42	0.997	.	2.66	.	.	6	.	.	.	1	.	32	.	3.15	.	9,0	3,2	0.092	0.428	9	5	7,0	2,2	1,0
chr1	27294616	TG	T	FRAME_SHIFT	HIGH	WDTC1		chr1	27294616	.	TG	T	.	normal_artifact;slippage;weak_evidence	.	93	223	1	FRAME_SHIFT(HIGH||gaa/|E290|WDTC1|protein_coding|CODING|ENST00000319394|9|INFO_REALIGN_3_PRIME)	TAGTCAACAT[G/-]GGGGGGGAAC	93	30,20	241230	60,60	32	-8.204	.	7.28	.	.	6	.	8,7	G	1	STR	93	1	4.46	.	97,13	90,11	0.098	0.082	110	101	50,3	28,7	38,9
chr1	27298007	G	A	SYNONYMOUS_CODING	LOW	WDTC1		chr1	27298007	.	G	A	.	PASS	.	93	355	1	SYNONYMOUS_CODING(LOW|SILENT|caG/caA|Q376|WDTC1|protein_coding|CODING|ENST00000319394|12)	TTGCCTGCCA[G/A]CAGTGGACCC	93	36,20	231232	60,60	31	2.24	.	52.21	.	.	6	.	.	.	93	.	93	.	74.76	.	174,0	136,39	0.005661	0.224	174	175	75,0	76,13	98,0
chr1	27325857	C	T	DOWNSTREAM	MODIFIER	RNU6-48P		chr1	27325857	.	C	T	.	weak_evidence	.	93	40	1	DOWNSTREAM(MODIFIER||532||RNU6-48P|snRNA|NON_CODING|ENST00000384161|)	TATAAATTGG[C/T]CCTGGCAAAT	87	38,34	259265	60,60	35	1.35	.	6.32	.	.	6	.	.	.	1	.	8	.	4.29	.	21,0	16,2	0.043	0.15	21	18	3,0	5,0	18,0
chr1	27332795	A	T	UPSTREAM	MODIFIER	TMEM222		chr1	27332795	.	A	T	.	weak_evidence	.	93	15	2	UPSTREAM(MODIFIER||668||TMEM222|retained_intron|CODING|ENST00000470223|)	TCCGGCAGGC[A/T]GCAGTGTAGT	33	37,34	308371	60,60	28	1.08	.	3.31	.	.	6	.	.	.	1	.	12	.	3.2	.	11,0	3,1	0.077	0.333	11	4	7,0	2,0	4,0
chr1	27332797	CA	GT	UPSTREAM	MODIFIER	TMEM222		chr1	27332797	.	CA	GT	.	weak_evidence	.	93	15	2	UPSTREAM(MODIFIER||666||TMEM222|retained_intron|CODING|ENST00000470223|)	CGGCAGGCAG[CA/GT]GTGTAGTCCA	33	39,36	308371	60,60	26	1.08	.	3.31	.	.	6	.	.	.	1	.	12	.	3.2	.	11,0	3,1	0.077	0.333	11	4	7,0	2,0	4,0
chr1	27335294	G	T	DOWNSTREAM	MODIFIER	TMEM222		chr1	27335294	.	G	T	.	normal_artifact	.	93	160	1	DOWNSTREAM(MODIFIER||398||TMEM222|protein_coding|CODING|ENST00000464813|)	CAGCCCTATT[G/T]GGGTCTGTGG	93	37,20	251228	60,60	34	-1.29	.	16.58	.	.	6	.	.	.	34	.	18	.	8.62	.	83,4	65,5	0.053	0.083	87	70	41,2	32,4	40,2
chr1	27416025	T	C	NON_SYNONYMOUS_CODING	MODERATE	WASF2		chr1	27416025	.	T	C	.	normal_artifact	.	93	235	1	NON_SYNONYMOUS_CODING(MODERATE|MISSENSE|cAg/cGg|Q166R|WASF2|protein_coding|CODING|ENST00000618852|5)	CTTGGTGTCC[T/C]GCAGCATCTT	93	32,31	229248	60,60	41	-13.5	.	7.52	.	.	6	.	.	.	93	.	93	.	61.04	.	111,9	84,27	0.079	0.245	120	111	57,2	37,16	51,7
chr1	27418298	A	G	SYNONYMOUS_CODING	LOW	WASF2		chr1	27418298	.	A	G	.	normal_artifact	.	93	125	1	SYNONYMOUS_CODING(LOW|SILENT|ccT/ccC|P130|WASF2|protein_coding|CODING|ENST00000618852|4)	TGAGAGGGGG[A/G]GGAGTATCAC	93	33,35	234231	60,60	37	-6.185	.	4.42	.	.	6	.	.	.	74	.	19	.	12.59	.	58,5	52,6	0.082	0.116	63	58	32,2	27,2	26,2
chr1	27548841	AAGG	A	CODON_CHANGE_PLUS_CODON_DELETION	MODERATE	AHDC1		chr1	27548841	.	AAGG	A	.	normal_artifact;slippage;weak_evidence	.	93	328	1	CODON_CHANGE_PLUS_CODON_DELETION(MODERATE||tccttc/ttc|SF1091F|AHDC1|protein_coding|CODING|ENST00000247087|5)	GAGGGCTGGA[AGG/-]AGGAGGAGGA	93	33,34	251218	60,60	25	-0.3401	.	29.61	.	.	3.91	.	7,6	AGG	1	STR	29	1	5.57	.	113,1	145,3	0.016	0.026	114	148	58,0	61,3	47,1
chr1	27549270	G	A	NON_SYNONYMOUS_CODING	MODERATE	AHDC1		chr1	27549270	.	G	A	.	normal_artifact	.	93	402	1	NON_SYNONYMOUS_CODING(MODERATE|MISSENSE|cCc/cTc|P949L|AHDC1|protein_coding|CODING|ENST00000247087|5)	TGAGGGCGGG[G/A]GCACCAGCTT	93	35,21	241249	60,60	38	-29.05	.	2.49	.	.	6	.	.	.	93	.	93	.	53.59	.	175,17	176,30	0.091	0.146	192	206	87,9	86,13	87,8
chr1	27550993	C	CG	FRAME_SHIFT	HIGH	AHDC1		chr1	27550993	.	C	CG	.	normal_artifact	.	93	852	1	FRAME_SHIFT(HIGH||ccc/cccC|P374P?|AHDC1|protein_coding|CODING|ENST00000247087|5)	CCTCAGGCCC[-/G]GGGGGGGCCG	93	29,24	232229	60,60	42	-33.6	.	20.94	.	.	6	.	7,8	G	93	STR	93	93	79.37	.	332,42	343,74	0.091	0.161	374	417	142,17	159,34	183,22
chr1	27882057	AAA	CCA,CCC	NON_SYNONYMOUS_CODING	MODERATE	THEMIS2		chr1	27882057	.	AAA	CCA,CCC	.	multiallelic;strand_bias	.	93	838	1	NON_SYNONYMOUS_CODING(MODERATE||aaa/CCa|K245P|THEMIS2|protein_coding|CODING|ENST00000328928|4)	CCACTTTATC[AA/CC]ACCGCTGCTG	93	32,26,37	233232226	60,60,60	44,57	1.48,2.11	.	91.20,112.03	.	.	6.00,6.00	.	.	.	93	.	1	.	26.13,40.44	.	355,15,0	326,58,51	0.011,2.612e-03	0.117,0.117	370	435	129,3,0	93,41,39	180,0,0
chr1	28096456	CT	C,CTT	UPSTREAM	MODIFIER	SPCS2P4		chr1	28096456	.	CT	C,CTT	.	germline;multiallelic;normal_artifact	.	93	787	1	UPSTREAM(MODIFIER||35||SPCS2P4|processed_pseudogene|NON_CODING|ENST00000436160|)	CGTATCTGAC[T/-]TTTTTTTTTT	1	20,20,26	230235238	60,60,60	39,35	-3.306e+02,1.17	.	-3.252e+02,77.32	.	.	1.89,0.770	.	11,10,12	T	93	STR	93	93	332.19,6.14	.	99,220,5	102,247,9	0.695,7.425e-03	0.693,0.025	324	358	48,108,3	38,102,2	44,103,2
chr1	28246782	GA	G,GAA	UPSTREAM	MODIFIER	RP5-1092A3.5		chr1	28246782	.	GA	G,GAA	.	normal_artifact;slippage	.	93	88	1	UPSTREAM(MODIFIER||361||RP5-1092A3.5|lincRNA|NON_CODING|ENST00000605846|)	ACAGAGACGG[A/-]AAAAAAAAAA	14	12,28,20	258269243	60,60,60	38,31	-2.384e+00,-1.935e+01	.	4.37,-2.193e+01	.	.	2.77,0.456	.	11,10,12	A	38	STR	91	1	10.01,4.34	.	17,2,17	10,6,8	0.075,0.442	0.243,0.308	36	24	7,2,7	3,4,3	0,0,5
chr1	28268735	AAAGG	A	INTRON	MODIFIER	SESN2		chr1	28268735	.	AAAGG	A	.	germline;slippage	.	93	32	1	INTRON(MODIFIER||||SESN2|protein_coding|CODING|ENST00000253063|1|INFO_REALIGN_3_PRIME)	AGGAGGAAGA[AAGG/-]AAGGAAGGAA	1	21,34	198230	60,60	41	1.13	.	3.61	.	.	3.71	.	4,3	AAGG	77	STR	85	1	16.73	.	12,0	10,5	0.07	0.356	12	15	9,0	8,4	3,0
chr1	28344524	T	C	INTERGENIC	MODIFIER			chr1	28344524	.	T	C	.	weak_evidence	.	93	13	1	INTERGENIC(MODIFIER||||||||)	GTCAGGAGAT[T/C]GAGACCGTCC	19	20,20	231188	60,60	43	0.953	.	2.4	.	.	6	.	.	.	1	.	32	.	3.15	.	8,0	3,2	0.1	0.428	8	5	2,0	2,0	6,0
chr1	28506201	CTTT	C,CTT,CTTTT	UPSTREAM	MODIFIER	SNHG3		chr1	28506201	.	CTTT	C,CTT,CTTTT	.	germline;multiallelic;normal_artifact	.	93	97	1	UPSTREAM(MODIFIER||149||SNHG3|retained_intron|NON_CODING|ENST00000437681|)	ATTTATTTAC[TTT/-]TTTTTTTTTT	1	32,20,36,38	229249212241	60,60,60,60	33,41,40	-5.937e+00,-1.225e+01,-6.518e-01	.	-2.217e+01,-2.363e+01,4.57	.	.	3.43,2.44,6.00	.	15,12,14,16	T	13	STR	93	93	4.72,7.14,6.30	.	6,10,10,2	23,5,7,5	0.347,0.392,0.067	0.161,0.206,0.127	28	40	2,5,3,1	8,5,2,2	3,5,7,1
chr1	28516759	CAG	C	UPSTREAM	MODIFIER	RCC1		chr1	28516759	.	CAG	C	.	slippage;weak_evidence	.	93	103	1	UPSTREAM(MODIFIER||1497||RCC1|protein_coding|CODING|ENST00000373831|)	GGAAGACAGC[AG/-]AGAGAGAGAG	93	36,20	248236	60,60	27	1.35	.	12.5	.	.	3.38	.	8,7	AG	1	STR	62	1	4.18	.	42,0	48,6	0.022	0.116	42	54	15,0	24,6	25,0
chr1	28532798	T	A	UPSTREAM	MODIFIER	RCC1		chr1	28532798	.	T	A	.	PASS	.	93	590	1	UPSTREAM(MODIFIER||3295||RCC1|retained_intron|CODING|ENST00000478232|)	TGTGGGTTTT[T/A]GTTGTTGTTG	93	22,20	234230	60,60	38	2.4	.	73.78	.	.	6	.	.	.	93	.	93	.	120.84	.	247,0	267,59	0.004001	0.18	247	326	122,0	160,26	118,0
chr1	28537969	C	T	PROTEIN_STRUCTURAL_INTERACTION_LOCUS	HIGH	RCC1		chr1	28537969	.	C	T	.	normal_artifact	.	93	288	1	PROTEIN_STRUCTURAL_INTERACTION_LOCUS(HIGH||||RCC1|protein_coding|CODING||13)	CGGGGGCCAG[C/T]ATACAGTCTT	93	20,31	231228	60,60	30	-16.5	.	5.71	.	.	6	.	.	.	93	.	43	.	17.01	.	119,10	144,11	0.083	0.076	129	155	73,4	78,7	44,6
chr1	28742384	CT	C	INTRON	MODIFIER	YTHDF2		chr1	28742384	.	CT	C	.	normal_artifact;slippage	.	93	145	1	INTRON(MODIFIER||||YTHDF2|protein_coding|CODING|ENST00000373812|3|INFO_REALIGN_3_PRIME)	TTGATTTGCC[T/-]TTTTTTTTCT	93	35,36	242258	60,60	43	-3.154	.	7.42	.	.	6	.	9,8	T	93	STR	73	1	19.31	.	54,3	68,16	0.069	0.186	57	84	25,1	25,9	25,2
chr1	29097809	TC	T	FRAME_SHIFT	HIGH	EPB41		chr1	29097809	.	TC	T	.	normal_artifact	.	93	318	1	FRAME_SHIFT(HIGH||ctg/|L508|EPB41|protein_coding|CODING|ENST00000349460|17|INFO_REALIGN_3_PRIME)	TTCACAGCCT[C/-]CCCTGGTGAA	93	34,37	233216	60,60	46	-3.394	.	22.55	.	.	6	.	4,3	C	88	STR	74	93	14.56	.	116,5	170,14	0.041	0.071	121	184	56,1	77,8	57,4
chr1	29148706	CCTT	C	CODON_DELETION	MODERATE	SRSF4		chr1	29148706	.	CCTT	C	.	normal_artifact;slippage;weak_evidence	.	93	457	1	CODON_DELETION(MODERATE||aag/|K396|SRSF4|protein_coding|CODING|ENST00000373795|6)	CAGTGTCTTC[CTT/-]CTTCTTCTTC	93	27,37	237243	60,60	33	-4.867	.	41.33	.	.	2.8	.	5,4	CTT	1	STR	19	1	4.88	.	183,4	219,3	0.026	0.018	187	222	81,2	114,0	94,1
chr1	29283000	G	A	UPSTREAM	MODIFIER	PTPRU		chr1	29283000	.	G	A	.	normal_artifact	.	93	179	1	UPSTREAM(MODIFIER||723||PTPRU|retained_intron|CODING|ENST00000531385|)	TGGGGGGATG[G/A]CAGACAGGAG	93	37,31	250255	60,60	40	-3.899	.	12.28	.	.	6	.	.	.	93	.	54	.	39.89	.	77,4	73,19	0.059	0.212	81	92	39,2	38,8	36,2
chr1	29515788	CCTT	C	INTERGENIC	MODIFIER			chr1	29515788	.	CCTT	C	.	slippage;weak_evidence	.	93	73	1	INTERGENIC(MODIFIER||||||||)	CCTCCTCCTC[CTT/-]CTTCTTCTTC	93	20,37	228267	60,60	22	1.46	.	8.11	.	.	4.31	.	5,4	CTT	1	STR	36	1	4.53	.	27,0	37,3	0.034	0.094	27	40	6,0	13,1	21,0
chr1	30742673	A	G	UPSTREAM	MODIFIER	MIR4420		chr1	30742673	.	A	G	.	normal_artifact	.	93	321	1	UPSTREAM(MODIFIER||3441||MIR4420|miRNA|NON_CODING|ENST00000583944|)	ATGGCATGCC[A/G]GGTCAGTAGG	93	37,36	244247	60,60	25	-13.71	.	24.36	.	.	6	.	.	.	62	.	3	.	11.45	.	175,10	124,6	0.053	0.053	185	130	88,8	57,3	82,2
chr1	30916418	G	T	DOWNSTREAM	MODIFIER	RN7SL371P		chr1	30916418	.	G	T	.	weak_evidence	.	93	10	1	DOWNSTREAM(MODIFIER||2051||RN7SL371P|misc_RNA|NON_CODING|ENST00000578099|)	CCAACGTGCT[G/T]GGATTACAGG	20	35,34	259263	60,60	14	0.954	.	2.4	.	.	6	.	.	.	1	.	15	.	3.1	.	8,0	1,1	0.1	0.5	8	2	4,0	1,1	4,0
chr1	30941049	AAAC	A	INTRON	MODIFIER	PUM1		chr1	30941049	.	AAAC	A	.	slippage;weak_evidence	.	93	69	1	INTRON(MODIFIER||||PUM1|protein_coding|CODING|ENST00000373741|20)	ATACTTTGAA[AAC/-]AACAACAACA	93	34,35	248238	60,60	42	1.53	.	9.61	.	.	4.01	.	7,6	AAC	1	STR	5	1	4.71	.	32,0	32,2	0.028	0.083	32	34	15,0	16,2	17,0
chr1	31227181	C	A	INTRON	MODIFIER	NKAIN1		chr1	31227181	.	C	A	.	weak_evidence	.	93	15	1	INTRON(MODIFIER||||NKAIN1|protein_coding|CODING|ENST00000373736|1)	GGTAGGAACC[C/A]TGGCTGTTGG	24	20,32	223295	60,60	39	0.999	.	2.7	.	.	6	.	.	.	1	.	30	.	5.36	.	9,0	4,2	0.091	0.383	9	6	5,0	0,2	4,0
chr1	31422541	A	G	INTRON	MODIFIER	SERINC2		chr1	31422541	.	A	G	.	weak_evidence	.	93	11	1	INTRON(MODIFIER||||SERINC2|protein_coding|CODING|ENST00000373709|1)	AGGCTGCATT[A/G]GCACTTTTCT	22	20,37	191198	60,60	15	0.954	.	2.4	.	.	6	.	.	.	1	.	12	.	3.1	.	8,0	2,1	0.1	0.4	8	3	5,0	1,0	3,0
chr1	31652558	AC	A	UTR_3_PRIME	MODIFIER	COL16A1		chr1	31652558	.	AC	A	.	normal_artifact	.	93	224	1	UTR_3_PRIME(MODIFIER||92||COL16A1|protein_coding|CODING|ENST00000373672|71)	ACAACAACAA[C/-]AAAAAAAACA	93	34,34	241235	60,60	29	-7.775	.	9.69	.	.	2.28	.	.	.	38	.	89	.	9.46	.	95,8	97,15	0.08	0.108	103	112	56,4	46,8	37,4
chr1	31665146	CTT	C	UPSTREAM	MODIFIER	COL16A1		chr1	31665146	.	CTT	C	.	normal_artifact	.	93	286	1	UPSTREAM(MODIFIER||1691||COL16A1|retained_intron|CODING|ENST00000488897|)	GATCTGTGAC[TT/-]TGCCAACCCA	93	34,35	237239	60,60	36	-14.61	.	12.61	.	.	6	.	3,1	T	93	STR	93	93	74.94	.	131,8	113,29	0.063	0.208	139	142	60,4	45,17	68,4
chr1	31691109	G	T	UPSTREAM	MODIFIER	COL16A1		chr1	31691109	.	G	T	.	normal_artifact	.	93	405	1	UPSTREAM(MODIFIER||1542||COL16A1|processed_transcript|CODING|ENST00000482478|)	TTCCCCTGTG[G/T]GAAGCTGCCC	93	36,23	242252	60,60	31	-6.36	.	35.41	.	.	6	.	.	.	93	.	66	.	38.92	.	180,7	182,24	0.041	0.117	187	206	91,4	97,10	86,3
chr1	31733122	G	A	SYNONYMOUS_CODING	LOW	ADGRB2		chr1	31733122	.	G	A	.	normal_artifact	.	93	183	1	SYNONYMOUS_CODING(LOW|SILENT|tgC/tgT|C1158|ADGRB2|protein_coding|CODING|ENST00000373655|26)	GCAGCACCAC[G/A]CAGGAGCTCC	93	29,30	234242	60,60	33	-10.17	.	2.88	.	.	6	.	.	.	65	.	53	.	11.72	.	72,6	92,9	0.087	0.095	78	101	34,3	51,6	36,3
chr1	31744413	A	C	UPSTREAM	MODIFIER	ADGRB2		chr1	31744413	.	A	C	.	base_qual;strand_bias	.	93	156	1	UPSTREAM(MODIFIER||740||ADGRB2|processed_transcript|CODING|ENST00000468430|)	ACTCAGTCTC[A/C]TAGGGATAGG	93	31,15	239219	60,60	29	1.84	.	20.09	.	.	6	.	.	.	93	.	1	.	18.86	.	67,0	61,22	0.014	0.229	67	83	34,0	20,0	31,0
chr1	31790971	TC	T	FRAME_SHIFT	HIGH	SPOCD1		chr1	31790971	.	TC	T	.	normal_artifact	.	93	405	1	FRAME_SHIFT(HIGH||ggg/|G1094|SPOCD1|protein_coding|CODING|ENST00000360482|16)	GCCAGAGCCT[C/-]CCCCTGCCTC	93	34,33	242236	60,60	45	-20.16	.	8.3	.	.	6	.	5,4	C	93	STR	93	93	52.45	.	162,17	173,41	0.091	0.18	179	214	77,7	79,15	80,10
chr1	31793204	AAG	A	DOWNSTREAM	MODIFIER	SPOCD1		chr1	31793204	.	AAG	A	.	germline;slippage	.	93	26	1	DOWNSTREAM(MODIFIER||1291||SPOCD1|retained_intron|CODING|ENST00000468720|)	CATGAGTGAA[AG/-]AGAGAGAGAG	1	35,34	281271	60,60	69	1.08	.	3.31	.	.	3.33	.	9,8	AG	35	STR	42	1	10.94	.	11,0	9,4	0.077	0.333	11	13	4,0	6,2	7,0
chr1	32160859	A	G	INTRON	MODIFIER	KPNA6		chr1	32160859	.	A	G	.	PASS	.	93	67	1	INTRON(MODIFIER||||KPNA6|protein_coding|CODING|ENST00000373625|7)	GTATCTTTGG[A/G]GATTGAGAAG	88	37,37	256253	60,60	21	1.47	.	8.93	.	.	6	.	.	.	93	.	58	.	32.1	.	32,1	21,10	0.032	0.333	33	31	19,0	10,6	13,0
chr1	32205702	T	A	SYNONYMOUS_CODING	LOW	IQCC		chr1	32205702	.	T	A	.	normal_artifact	.	93	355	1	SYNONYMOUS_CODING(LOW|SILENT|gtT/gtA|V7|IQCC|protein_coding|CODING|ENST00000537469|1)	AGCTGCTGGT[T/A]CGGAAGGTGT	93	33,20	241244	60,60	31	-16.03	.	15.44	.	.	6	.	.	.	93	.	93	.	59.15	.	157,11	140,35	0.069	0.195	168	175	60,3	58,22	94,7
chr1	32206226	G	T	STOP_GAINED	HIGH	IQCC		chr1	32206226	.	G	T	.	normal_artifact	.	93	661	1	STOP_GAINED(HIGH|NONSENSE|Gag/Tag|E119*|IQCC|protein_coding|CODING|ENST00000537469|2)	GATTGTACGA[G/T]AGGTCGAGGG	93	20,20	236232	60,60	41	-29.36	.	24.69	.	.	6	.	.	.	93	.	93	.	129.56	.	276,22	284,73	0.075	0.202	298	357	128,10	147,27	144,11
chr1	32536773	C	A	UPSTREAM	MODIFIER	ZBTB8A		chr1	32536773	.	C	A	.	normal_artifact	.	93	86	1	UPSTREAM(MODIFIER||2654||ZBTB8A|protein_coding|CODING|ENST00000373510|)	TCTACCTCCA[C/A]TCTAGTTCAA	50	38,32	248244	60,60	54	-5.968	.	2.95	.	.	6	.	.	.	84	.	9	.	13.81	.	47,3	26,7	0.077	0.221	50	33	20,1	12,3	24,2
chr1	32615452	C	T	INTRON	MODIFIER	ZBTB8OS		chr1	32615452	.	C	T	.	weak_evidence	.	93	19	1	INTRON(MODIFIER||||ZBTB8OS|protein_coding|CODING|ENST00000341885|1)	TTGGTTCATT[C/T]TAAAAGCACA	25	37,20	259258	60,60	41	0.954	.	2.4	.	.	6	.	.	.	1	.	32	.	5.03	.	8,0	8,3	0.1	0.305	8	11	5,0	7,0	3,0
chr1	32632587	G	GT	UPSTREAM	MODIFIER	ZBTB8OS		chr1	32632587	.	G	GT	.	weak_evidence	.	93	24	1	UPSTREAM(MODIFIER||530||ZBTB8OS|retained_intron|CODING|ENST00000467652|)	ATAATTATTG[-/T]TTTTTTTGTT	10	20,21	225295	60,60	32	1.1	.	3.36	.	.	4.61	.	7,8	T	1	STR	10	93	3.67	.	12,0	6,2	0.073	0.305	12	8	8,0	0,1	3,0
chr1	32656455	C	T	DOWNSTREAM	MODIFIER	RBBP4		chr1	32656455	.	C	T	.	weak_evidence	.	93	13	1	DOWNSTREAM(MODIFIER||3949||RBBP4|retained_intron|CODING|ENST00000465780|)	TGGGTTCAAG[C/T]AGTTCTCCTG	19	20,20	238240	60,60	30	0.954	.	2.4	.	.	6	.	.	.	1	.	32	.	3.17	.	8,0	3,2	0.1	0.428	8	5	4,0	1,0	4,0
chr1	32768279	G	T	INTRON	MODIFIER	KIAA1522		chr1	32768279	.	G	T	.	strand_bias;weak_evidence	.	93	50	1	INTRON(MODIFIER||||KIAA1522|protein_coding|CODING|ENST00000373480|3)	GGTGATGCTG[G/T]AGGGGATCTG	93	38,32	277218	60,60	45	1.46	.	8.38	.	.	6	.	.	.	1	.	1	.	3.79	.	28,0	17,2	0.033	0.141	28	19	14,0	6,2	13,0
chr1	32789845	C	T	UPSTREAM	MODIFIER	YARS		chr1	32789845	.	C	T	.	weak_evidence	.	93	15	1	UPSTREAM(MODIFIER||3111||YARS|processed_transcript|CODING|ENST00000478828|)	CCGCCTTGGC[C/T]TCCCAAAGTG	25	35,20	255160	60,60	9	1.04	.	3.01	.	.	6	.	.	.	1	.	32	.	3.11	.	10,0	3,2	0.083	0.428	10	5	3,0	1,0	7,0
chr1	33010803	T	G	UTR_3_PRIME	MODIFIER	AK2		chr1	33010803	.	T	G	.	fragment;normal_artifact;weak_evidence	.	93	139	1	UTR_3_PRIME(MODIFIER||26||AK2|protein_coding|CODING|ENST00000373449|7)	ATGAGCAGTG[T/G]TGCAGTCTCG	93	29,37	23225620258	60,53	14	-10.13	.	3.67	.	.	0.321	.	.	.	1	.	3	.	3.86	.	68,4	63,2	0.068	0.045	72	65	35,2	29,1	33,2
chr1	33031819	CA	C	UPSTREAM	MODIFIER	Metazoa_SRP		chr1	33031819	.	CA	C	.	normal_artifact	.	93	105	1	UPSTREAM(MODIFIER||2244||Metazoa_SRP|misc_RNA|NON_CODING|ENST00000610352|)	AGGGGTTGGC[A/-]AAAAAACCAA	93	37,36	256216	60,60	45	-0.252	.	7.71	.	.	6	.	7,6	A	8	STR	55	93	6.54	.	42,3	39,6	0.062	0.136	45	45	20,2	22,4	18,1
chr1	33176569	C	T	UPSTREAM	MODIFIER	TRIM62		chr1	33176569	.	C	T	.	normal_artifact	.	93	103	1	UPSTREAM(MODIFIER||19||TRIM62|protein_coding|CODING|ENST00000543586|)	GAGCCGGATG[C/T]CACGTCTGCT	93	38,33	250275	60,60	46	-5.805	.	2.66	.	.	6	.	.	.	57	.	4	.	10.85	.	45,3	45,5	0.08	0.115	48	50	23,1	17,4	21,2
chr1	33479475	G	A	NON_SYNONYMOUS_CODING	MODERATE	ZSCAN20		chr1	33479475	.	G	A	.	PASS	.	93	537	1	NON_SYNONYMOUS_CODING(MODERATE|MISSENSE|Gct/Act|A63T|ZSCAN20|protein_coding|CODING|ENST00000373413|2)	CAGGGATGCA[G/A]CTGGACCCCA	93	36,24	234243	60,60	23	2.4	.	73.99	.	.	6	.	.	.	27	.	25	.	8.44	.	247,0	267,9	0.003956	0.034	247	276	138,0	121,4	105,0
chr1	33488421	T	C	INTRON	MODIFIER	ZSCAN20		chr1	33488421	.	T	C	.	normal_artifact	.	93	157	1	INTRON(MODIFIER||||ZSCAN20|protein_coding|CODING|ENST00000373413|2)	CCAAAGTGGG[T/C]CTTACTGAAT	93	21,32	232236	60,60	50	-9.366	.	2.46	.	.	6	.	.	.	93	.	61	.	19.6	.	61,4	80,12	0.075	0.133	65	92	20,1	40,5	40,3
chr1	33493390	G	A	NON_SYNONYMOUS_CODING	MODERATE	ZSCAN20		chr1	33493390	.	G	A	.	normal_artifact	.	93	853	1	NON_SYNONYMOUS_CODING(MODERATE|MISSENSE|Gcc/Acc|A550T|ZSCAN20|protein_coding|CODING|ENST00000361328|7)	CTACCGGAAA[G/A]CCAAGAGCAG	93	36,30	236238	60,60	38	-36.81	.	41.64	.	.	6	.	.	.	93	.	93	.	199.49	.	371,24	332,99	0.06	0.228	395	431	206,7	176,49	160,16
chr1	33616897	C	T	INTRON	MODIFIER	CSMD2		chr1	33616897	.	C	T	.	normal_artifact	.	93	590	1	INTRON(MODIFIER||||CSMD2|protein_coding|CODING|ENST00000373381|39)	AAAGTCTGGG[C/T]TGTCTTACCA	93	20,20	229212	60,60	36	-16.67	.	43.06	.	.	6	.	.	.	93	.	93	.	34.58	.	267,13	274,27	0.048	0.09	280	301	135,5	148,12	128,8
chr1	33739042	C	A	INTRON	MODIFIER	CSMD2		chr1	33739042	.	C	A	.	weak_evidence	.	93	39	1	INTRON(MODIFIER||||CSMD2|protein_coding|CODING|ENST00000373381|15)	GAGGAAGGAC[C/A]AACGCAGAAA	84	36,33	290272	60,60	6	1.35	.	6.27	.	.	6	.	.	.	1	.	8	.	4.17	.	21,0	15,2	0.043	0.158	21	17	14,0	9,0	6,0
chr1	33751869	C	T	INTRON	MODIFIER	CSMD2		chr1	33751869	.	C	T	.	weak_evidence	.	93	13	1	INTRON(MODIFIER||||CSMD2|protein_coding|CODING|ENST00000373381|13)	TCATGATCTG[C/T]CTGCCTTGGC	20	20,20	212208	60,60	33	0.999	.	2.7	.	.	6	.	.	.	1	.	35	.	3.45	.	9,0	2,2	0.091	0.499	9	4	5,0	0,0	3,0
chr1	33864714	A	G	NON_SYNONYMOUS_CODING	MODERATE	HMGB4		chr1	33864714	.	A	G	.	normal_artifact	.	93	207	1	NON_SYNONYMOUS_CODING(MODERATE|MISSENSE|Aga/Gga|R175G|HMGB4|protein_coding|CODING|ENST00000519684|2)	AATGTCAGCT[A/G]GAAACCGGTG	93	37,30	247240	60,60	48	-14.29	.	4.1	.	.	4.61	.	.	.	93	.	93	.	45.13	.	92,6	80,22	0.07	0.217	98	102	51,2	36,8	39,4
chr1	34905129	AC	A	FRAME_SHIFT	HIGH	DLGAP3		chr1	34905129	.	AC	A	.	normal_artifact;slippage	.	93	369	1	FRAME_SHIFT(HIGH||ggt/|G85|DLGAP3|protein_coding|CODING|ENST00000235180|1)	GGTGCTGCTA[C/-]CCCCCCCAAC	93	31,26	237221	60,60	50	-8.155	.	18.88	.	.	6	.	8,7	C	93	STR	93	1	25.55	.	146,14	152,22	0.068	0.12	160	174	73,9	60,7	59,5
chr1	35010678	T	A	UPSTREAM	MODIFIER	ZMYM6		chr1	35010678	.	T	A	.	normal_artifact	.	93	109	1	UPSTREAM(MODIFIER||1886||ZMYM6|processed_transcript|CODING|ENST00000466345|)	TCAAAGCAAA[T/A]TGAGTGATCA	93	32,32	266272	60,60	26	-4.875	.	5.42	.	.	6	.	.	.	26	.	16	.	7.79	.	52,3	47,4	0.07	0.094	55	51	23,2	24,2	27,1
chr1	35385662	G	GT	INTRON	MODIFIER	ZMYM4		chr1	35385662	.	G	GT	.	slippage;weak_evidence	.	93	157	1	INTRON(MODIFIER||||ZMYM4|protein_coding|CODING|ENST00000314607|10|INFO_REALIGN_3_PRIME)	TTTTTAACGG[-/T]TTTTTTTTGG	93	35,20	242213	60,60	61	1.84	.	18.44	.	.	3.83	.	8,9	T	1	STR	74	1	3.15	.	64,0	56,9	0.014	0.113	64	65	27,0	26,5	35,0
chr1	35392446	T	C	UPSTREAM	MODIFIER	ZMYM4		chr1	35392446	.	T	C	.	normal_artifact	.	93	124	1	UPSTREAM(MODIFIER||234||ZMYM4|processed_transcript|CODING|ENST00000470175|)	TTCATACATT[T/C]GACACATTCA	93	33,20	257236	60,60	45	-0.5526	.	6.72	.	.	6	.	.	.	93	.	53	.	17.79	.	39,3	61,10	0.074	0.15	42	71	20,2	29,5	19,0
chr1	35412161	G	A	DOWNSTREAM	MODIFIER	ZMYM4		chr1	35412161	.	G	A	.	clustered_events;haplotype;weak_evidence	.	93	11	4	DOWNSTREAM(MODIFIER||4109||ZMYM4|processed_transcript|CODING|ENST00000492456|)	TTACAGGCAT[G/A]AGCCACCGCA	3	38,34	266193	60,55	14	0.954	.	2.41	.	.	3.91	.	.	.	1	.	13	.	3.42	.	8,0	2,1	0.1	0.4	8	3	2,0	1,0	6,0
chr1	35412169	G	A	DOWNSTREAM	MODIFIER	ZMYM4		chr1	35412169	.	G	A	.	clustered_events;germline;haplotype;weak_evidence	.	93	11	4	DOWNSTREAM(MODIFIER||4117||ZMYM4|processed_transcript|CODING|ENST00000492456|)	ATGAGCCACC[G/A]CACCTGGCGG	1	25,32	266193	60,55	6	0.954	.	2.41	.	.	2.23	.	.	.	1	.	13	.	3.42	.	8,0	2,1	0.1	0.4	8	3	2,0	1,0	6,0
chr1	35412171	A	T	DOWNSTREAM	MODIFIER	ZMYM4		chr1	35412171	.	A	T	.	clustered_events;haplotype;weak_evidence	.	93	11	4	DOWNSTREAM(MODIFIER||4119||ZMYM4|processed_transcript|CODING|ENST00000492456|)	GAGCCACCGC[A/T]CCTGGCGGGA	22	26,33	266193	60,55	4	0.954	.	2.41	.	.	6	.	.	.	1	.	13	.	3.42	.	8,0	2,1	0.1	0.4	8	3	2,0	1,0	5,0
chr1	35412174	TG	CA	DOWNSTREAM	MODIFIER	ZMYM4		chr1	35412174	.	TG	CA	.	clustered_events;haplotype;weak_evidence	.	93	11	4	DOWNSTREAM(MODIFIER||4122||ZMYM4|processed_transcript|CODING|ENST00000492456|)	CCACCGCACC[TG/CA]GCGGGACTTT	22	33,37	266193	60,55	1	0.954	.	2.41	.	.	6	.	.	.	1	.	13	.	3.42	.	8,0	2,1	0.1	0.4	8	3	2,0	1,0	6,0
chr1	35825858	TTTTG	T	INTRON	MODIFIER	AGO4		chr1	35825858	.	TTTTG	T	.	normal_artifact;slippage;weak_evidence	.	93	425	1	INTRON(MODIFIER||||AGO4|protein_coding|CODING|ENST00000373210|5|INFO_REALIGN_3_PRIME)	TGGGCTGGTT[TTTG/-]TTTGTTTGTT	93	33,33	242253	60,60	27	-2.465	.	47.44	.	.	6	.	4,3	TTTG	1	STR	48	1	4.65	.	186,2	190,4	0.016	0.025	188	194	89,1	88,0	84,1
chr1	35850817	C	CA	UPSTREAM	MODIFIER	AGO4		chr1	35850817	.	C	CA	.	normal_artifact;slippage;weak_evidence	.	93	167	1	UPSTREAM(MODIFIER||2670||AGO4|processed_transcript|CODING|ENST00000496257|)	AAAAACGAAC[-/A]AAAAAAAAAA	93	35,35	241246	60,60	11	-0.6731	.	19.27	.	.	1.8	.	10,11	A	1	STR	25	1	5.78	.	85,2	66,5	0.033	0.084	87	71	44,1	36,2	36,1
chr1	35915652	T	C	INTRON	MODIFIER	AGO1		chr1	35915652	.	T	C	.	normal_artifact	.	93	58	1	INTRON(MODIFIER||||AGO1|protein_coding|CODING|ENST00000373204|15)	CTTAGTGAGC[T/C]TTGCTAAATG	78	35,38	277259	60,60	35	-1.409	.	4.65	.	.	6	.	.	.	49	.	9	.	10.14	.	29,1	24,4	0.062	0.167	30	28	15,1	14,2	14,0
chr1	36043600	C	T	INTRON	MODIFIER	AGO3		chr1	36043600	.	C	T	.	normal_artifact	.	93	108	1	INTRON(MODIFIER||||AGO3|protein_coding|CODING|ENST00000246314|15)	GTCATTCTTA[C/T]GTGTATTTTT	93	29,30	245230	60,60	31	-3.067	.	5.97	.	.	4.01	.	.	.	85	.	42	.	13.63	.	44,2	49,8	0.062	0.152	46	57	20,0	25,5	21,2
chr1	36098779	G	T	NON_SYNONYMOUS_CODING	MODERATE	COL8A2		chr1	36098779	.	G	T	.	normal_artifact	.	93	766	1	NON_SYNONYMOUS_CODING(MODERATE|MISSENSE|cCa/cAa|P236Q|COL8A2|protein_coding|CODING|ENST00000481785|2)	CCGGGTCCCT[G/T]GCTCCCCTTT	93	34,33	235235	60,60	39	-46.92	.	10.97	.	.	6	.	.	.	93	.	93	.	142.57	.	302,26	339,72	0.079	0.174	328	411	145,11	178,32	152,14
chr1	36107785	T	G	INTRON	MODIFIER	COL8A2		chr1	36107785	.	T	G	.	weak_evidence	.	93	22	1	INTRON(MODIFIER||||COL8A2|protein_coding|CODING|ENST00000397799|2)	CCTGCCTCCT[T/G]TTCACTGCAA	41	20,32	220302	60,60	15	1.11	.	3.55	.	.	6	.	.	.	1	.	7	.	4.58	.	12,0	8,2	0.072	0.253	12	10	5,0	2,1	6,0
chr1	36176569	G	A	SYNONYMOUS_CODING	LOW	MAP7D1		chr1	36176569	.	G	A	.	normal_artifact	.	93	238	1	SYNONYMOUS_CODING(LOW|SILENT|ccG/ccA|P407|MAP7D1|protein_coding|CODING|ENST00000373151|7)	GCCGCCGGCC[G/A]GAGGCCTCGC	93	29,34	237250	60,60	41	0.258	.	31.17	.	.	6	.	.	.	91	.	12	.	14.28	.	116,1	110,7	0.017	0.067	117	117	56,1	53,2	57,0
chr1	36179538	C	T	SYNONYMOUS_CODING	LOW	MAP7D1		chr1	36179538	.	C	T	.	normal_artifact	.	93	350	1	SYNONYMOUS_CODING(LOW|SILENT|aaC/aaT|N737|MAP7D1|protein_coding|CODING|ENST00000373151|14)	AGGAGGCCAA[C/T]GCCAACGGTT	93	29,20	239221	60,60	39	-18.46	.	6.4	.	.	6	.	.	.	93	.	93	.	45.63	.	144,16	145,27	0.097	0.16	160	172	78,11	67,18	64,3
chr1	36220472	T	C	UPSTREAM	MODIFIER	THRAP3		chr1	36220472	.	T	C	.	weak_evidence	.	93	14	1	UPSTREAM(MODIFIER||3944||THRAP3|protein_coding|CODING|ENST00000354618|)	GGTCAGGAGT[T/C]CGAGACCAGC	17	27,20	242237	60,60	31	0.954	.	2.4	.	.	6	.	.	.	1	.	35	.	3.34	.	8,0	2,2	0.1	0.499	8	4	2,0	2,0	6,0
chr1	36270939	T	C	INTRON	MODIFIER	THRAP3		chr1	36270939	.	T	C	.	weak_evidence	.	93	12	1	INTRON(MODIFIER||||THRAP3|protein_coding|CODING|ENST00000354618|2)	AAAAATAAAA[T/C]AATGTACACA	26	20,38	252203	60,60	36	1.04	.	3	.	.	6	.	.	.	1	.	15	.	3.5	.	10,0	1,1	0.083	0.5	10	2	3,0	1,0	7,0
chr1	36319345	C	G	UPSTREAM	MODIFIER	RP11-268J15.5		chr1	36319345	.	C	G	.	normal_artifact	.	93	519	1	UPSTREAM(MODIFIER||4389||RP11-268J15.5|antisense|NON_CODING|ENST00000373137|)	GCGGGGAGGA[C/G]TGGAGGACAG	93	35,35	241248	60,60	35	-36.62	.	4.27	.	.	6	.	.	.	93	.	93	.	108.1	.	229,23	212,46	0.093	0.18	252	258	118,19	108,27	105,4
chr1	36322541	GTCC	G	CODON_CHANGE_PLUS_CODON_DELETION	MODERATE	EVA1B		chr1	36322541	.	GTCC	G	.	normal_artifact	.	93	457	1	CODON_CHANGE_PLUS_CODON_DELETION(MODERATE||gaggac/gac|ED83D|EVA1B|protein_coding|CODING|ENST00000270824|3)	AGTCACCGTG[TCC/-]TCCTCGTCCT	93	33,35	238235	60,60	48	-35.15	.	3.34	.	.	6	.	2,1	TCC	93	STR	93	93	60.2	.	195,15	201,24	0.075	0.109	210	225	87,7	100,11	100,8
chr1	36341719	A	G	UTR_3_PRIME	MODIFIER	STK40		chr1	36341719	.	A	G	.	normal_artifact	.	93	76	1	UTR_3_PRIME(MODIFIER||36||STK40|protein_coding|CODING|ENST00000373130|11)	GGGCTGGAAG[A/G]AGTGGCAGCA	93	33,38	266273	60,60	47	-1.142	.	7.95	.	.	6	.	.	.	93	.	28	.	17.72	.	40,1	29,6	0.047	0.191	41	35	19,1	14,5	21,0
chr1	36344088	GC	G	INTRON	MODIFIER	STK40		chr1	36344088	.	GC	G	.	normal_artifact;slippage;weak_evidence	.	93	453	1	INTRON(MODIFIER||||STK40|protein_coding|CODING|ENST00000373130|8)	AGGCTGGCTG[C/-]CCCCCCCACC	93	20,20	240238	60,60	32	-11.37	.	13.45	.	.	3.65	.	8,7	C	1	STR	93	1	5.44	.	169,27	201,20	0.103	0.058	196	221	81,12	107,5	81,13
chr1	36384053	A	G	INTRON	MODIFIER	STK40		chr1	36384053	.	A	G	.	PASS	.	93	17	1	INTRON(MODIFIER||||STK40|protein_coding|CODING|ENST00000373130|1)	TTTTTGAGAC[A/G]GAGTCTCACT	27	32,20	228176	60,44	39	0.954	.	2.41	.	.	6	.	.	.	10	.	26	.	6.44	.	8,0	7,2	0.1	0.273	8	9	3,0	5,0	3,0
chr1	36825838	CAG	C	INTRON	MODIFIER	GRIK3		chr1	36825838	.	CAG	C	.	normal_artifact;slippage	.	93	332	1	INTRON(MODIFIER||||GRIK3|protein_coding|CODING|ENST00000373091|10)	GCAACCAGAC[AG/-]AGAGAGAAAG	93	36,25	238236	60,60	54	-3.036	.	32.58	.	.	4.61	.	4,3	AG	80	STR	90	1	14.8	.	142,3	158,11	0.026	0.067	145	169	81,1	88,5	58,2
chr1	37495709	A	C	DOWNSTREAM	MODIFIER	MEAF6		chr1	37495709	.	A	C	.	normal_artifact;weak_evidence	.	93	106	1	DOWNSTREAM(MODIFIER||165||MEAF6|protein_coding|CODING|ENST00000448519|)	AAAAACAAAA[A/C]AAAAAAAAAA	93	30,35	229240	60,60	44	-1.661	.	5.12	.	.	3.01	.	.	.	1	.	3	.	4.37	.	42,5	47,4	0.089	0.094	47	51	19,1	18,2	23,3
chr1	37540069	T	C	UPSTREAM	MODIFIER	FTH1P1		chr1	37540069	.	T	C	.	normal_artifact	.	93	120	1	UPSTREAM(MODIFIER||4694||FTH1P1|processed_pseudogene|NON_CODING|ENST00000437933|)	ATGGGATTCT[T/C]CTGCATAAAC	93	33,37	248273	60,60	23	-0.5654	.	13.23	.	.	6	.	.	.	61	.	22	.	11.23	.	57,1	53,6	0.033	0.114	58	59	23,0	30,2	32,1
chr1	37574590	CA	C	UPSTREAM	MODIFIER	GNL2		chr1	37574590	.	CA	C	.	normal_artifact	.	93	173	1	UPSTREAM(MODIFIER||3698||GNL2|processed_transcript|CODING|ENST00000462812|)	CATGCATACC[A/-]AAAAAAGGCC	93	36,37	247255	60,60	37	0.539	.	16.92	.	.	6	.	7,6	A	24	STR	56	93	8.12	.	67,1	81,6	0.028	0.079	68	87	25,1	38,3	41,0
chr1	37583970	A	G	UPSTREAM	MODIFIER	GNL2		chr1	37583970	.	A	G	.	normal_artifact	.	93	180	1	UPSTREAM(MODIFIER||624||GNL2|processed_transcript|CODING|ENST00000489146|)	CAACTGAAGC[A/G]CCATCAAGAC	93	31,33	234231	60,60	38	-5.334	.	12.83	.	.	6	.	.	.	93	.	48	.	19.35	.	84,4	79,10	0.054	0.12	88	89	48,3	42,6	36,1
chr1	37690015	GT	G	UPSTREAM	MODIFIER	CDCA8		chr1	37690015	.	GT	G	.	normal_artifact;slippage	.	93	85	1	UPSTREAM(MODIFIER||2465||CDCA8|protein_coding|CODING|ENST00000327331|)	AGAAGCAGGG[T/-]TTTTTTTTTG	46	36,35	258246	60,60	39	0.231	.	7.52	.	.	2.32	.	10,9	T	86	STR	63	1	14.85	.	34,1	29,10	0.053	0.262	35	39	18,0	10,5	13,1
chr1	37719565	TG	T	FRAME_SHIFT	HIGH	EPHA10		chr1	37719565	.	TG	T	.	normal_artifact	.	93	304	1	FRAME_SHIFT(HIGH||ccc/|P868|EPHA10|protein_coding|CODING|ENST00000427468|15)	GACAGTTCCT[G/-]GGGGGTGGCA	93	32,32	232235	60,60	44	-12.27	.	11.68	.	.	6	.	6,5	G	59	STR	86	93	11.6	.	134,12	118,15	0.079	0.092	146	133	67,8	58,5	57,4
chr1	37722074	T	G	UPSTREAM	MODIFIER	EPHA10		chr1	37722074	.	T	G	.	base_qual;strand_bias	.	93	174	1	UPSTREAM(MODIFIER||217||EPHA10|retained_intron|CODING|ENST00000453577|)	GAGGTTTCAG[T/G]GAGCTGAGAT	93	30,14	255270	60,60	46	1.98	.	27.72	.	.	6	.	.	.	16	.	1	.	6.77	.	93,0	65,11	0.01	0.105	93	76	47,0	22,3	41,0
chr1	37734535	AAAAT	A	DOWNSTREAM	MODIFIER	Y_RNA		chr1	37734535	.	AAAAT	A	.	normal_artifact;slippage;weak_evidence	.	93	120	1	DOWNSTREAM(MODIFIER||3419||Y_RNA|misc_RNA|NON_CODING|ENST00000363551|)	CTCTGTCTCA[AAAT/-]AAATAAATAA	93	33,27	250225	60,60	15	-0.8426	.	15.31	.	.	4.13	.	6,5	AAAT	1	STR	39	1	5.88	.	65,1	41,3	0.029	0.086	66	44	29,1	16,3	33,0
chr1	37753193	C	T	NON_SYNONYMOUS_CODING	MODERATE	EPHA10		chr1	37753193	.	C	T	.	normal_artifact	.	93	82	1	NON_SYNONYMOUS_CODING(MODERATE|MISSENSE|aGc/aAc|S347N|EPHA10|protein_coding|CODING|ENST00000427468|5)	GCGGCTCAGG[C/T]TGTACTGCAG	93	37,31	223239	60,60	20	-0.2654	.	8.45	.	.	6	.	.	.	93	.	58	.	17.64	.	39,1	31,8	0.047	0.212	40	39	21,1	18,6	16,0
chr1	37794331	G	A	NON_SYNONYMOUS_CODING	MODERATE	MANEAL		chr1	37794331	.	G	A	.	normal_artifact	.	93	201	1	NON_SYNONYMOUS_CODING(MODERATE|MISSENSE|cGc/cAc|R50H|MANEAL|protein_coding|CODING|ENST00000373045|1)	TTTGAGCGAC[G/A]CCCAGAGGGG	93	20,20	232210	60,60	25	-7.058	.	6.37	.	.	6	.	.	.	93	.	84	.	18.19	.	76,7	97,14	0.092	0.127	83	111	40,4	51,8	35,3
chr1	37809191	T	C	UTR_3_PRIME	MODIFIER	C1orf122		chr1	37809191	.	T	C	.	normal_artifact	.	93	281	1	UTR_3_PRIME(MODIFIER||118||C1orf122|protein_coding|CODING|ENST00000373042|3)	TACTTGGCTC[T/C]CAGCCTGGAG	93	33,20	237230	60,60	30	-9.569	.	20.14	.	.	6	.	.	.	93	.	71	.	22.54	.	133,6	123,15	0.049	0.112	139	138	71,2	57,7	62,4
chr1	37857690	A	G	UTR_5_PRIME	MODIFIER	MTF1		chr1	37857690	.	A	G	.	PASS	.	93	58	1	UTR_5_PRIME(MODIFIER||32||MTF1|protein_coding|CODING|ENST00000373036|2)	GTTGTGAGAA[A/G]TGAAAACGTA	93	31,28	245209	60,60	41	1.38	.	6.91	.	.	6	.	.	.	15	.	22	.	6.71	.	23,0	31,4	0.04	0.134	23	35	8,0	13,3	15,0
chr1	38886444	CT	C	UTR_3_PRIME	MODIFIER	RHBDL2		chr1	38886444	.	CT	C	.	normal_artifact;slippage;weak_evidence	.	93	56	1	UTR_3_PRIME(MODIFIER||59||RHBDL2|protein_coding|CODING|ENST00000289248|8)	AGAGTCTTCC[T/-]TTTTTTTTTA	49	36,37	265194	60,60	5	-0.07458	.	4.37	.	.	2.2	.	10,9	T	1	STR	6	1	3.4	.	23,1	29,3	0.076	0.117	24	32	14,0	15,1	9,1
chr1	39327175	G	GT	UPSTREAM	MODIFIER	MACF1		chr1	39327175	.	G	GT	.	normal_artifact;slippage	.	93	155	1	UPSTREAM(MODIFIER||1193||MACF1|processed_transcript|CODING|ENST00000528611|)	TTGGAGATTG[-/T]TTTTTTTTTC	93	38,33	250228	60,60	36	-4.239	.	7.94	.	.	6	.	9,10	T	62	STR	56	1	12.56	.	71,7	58,13	0.081	0.173	78	71	27,5	27,10	44,2
chr1	39334030	T	C	NON_SYNONYMOUS_CODING	MODERATE	MACF1		chr1	39334030	.	T	C	.	normal_artifact	.	93	241	1	NON_SYNONYMOUS_CODING(MODERATE|MISSENSE|gTg/gCg|V2518A|MACF1|protein_coding|CODING|ENST00000567887|37)	TTAACAGTTG[T/C]GCAGTCCATT	93	31,25	230237	60,60	36	-15.51	.	3.66	.	.	6	.	.	.	93	.	93	.	35.64	.	104,9	101,19	0.086	0.163	113	120	53,4	49,8	51,5
chr1	39387193	G	A	NON_SYNONYMOUS_CODING	MODERATE	MACF1		chr1	39387193	.	G	A	.	normal_artifact	.	93	96	2	NON_SYNONYMOUS_CODING(MODERATE|MISSENSE|cGc/cAc|R4821H|MACF1|protein_coding|CODING|ENST00000567887|58)	TCAGCCGATC[G/A]CATTAACAGA	93	30,34	238267	60,60	41	-2.607	.	7.08	.	.	6	.	.	.	93	.	5	.	16.42	.	46,2	37,7	0.06	0.166	48	44	14,0	19,6	32,2
chr1	39387200	C	A	NON_SYNONYMOUS_CODING	MODERATE	MACF1		chr1	39387200	.	C	A	.	weak_evidence	.	93	104	2	NON_SYNONYMOUS_CODING(MODERATE|MISSENSE|aaC/aaA|N4823K|MACF1|protein_coding|CODING|ENST00000567887|58)	ATCGCATTAA[C/A]AGACTCCAGG	93	35,35	239271	60,60	52	1.73	.	15.65	.	.	6	.	.	.	1	.	4	.	3.2	.	52,0	46,2	0.018	0.059	52	48	17,0	26,2	34,0
chr1	39410471	C	T	NON_SYNONYMOUS_CODING	MODERATE	MACF1		chr1	39410471	.	C	T	.	normal_artifact	.	93	180	1	NON_SYNONYMOUS_CODING(MODERATE|MISSENSE|aCt/aTt|T69I|MACF1|protein_coding|CODING|ENST00000530275|1)	GAAGGAAGTA[C/T]TATATCCAGC	93	35,34	246261	60,60	43	-9.81	.	6.51	.	.	6	.	.	.	41	.	26	.	9.27	.	81,5	82,5	0.068	0.067	86	87	34,2	40,2	46,3
chr1	39515736	G	A	INTRON	MODIFIER	BMP8A		chr1	39515736	.	G	A	.	map_qual;normal_artifact;strand_bias	.	93	965	1	INTRON(MODIFIER||||BMP8A|protein_coding|CODING|ENST00000331593|3)	ATTTATGTAG[G/A]TCGCGTGATA	93	33,34	230204	60,27	19	-3.563	.	107.79	.	.	2.65	.	.	.	48	.	1	.	11.52	.	417,6	505,12	0.016	0.024	423	517	210,4	250,5	200,2
chr1	39522473	T	C	SYNONYMOUS_CODING	LOW	BMP8A		chr1	39522473	.	T	C	.	map_qual;normal_artifact;strand_bias	.	93	495	1	SYNONYMOUS_CODING(LOW|SILENT|ctT/ctC|L313|BMP8A|protein_coding|CODING|ENST00000331593|5)	TCCAGGACCT[T/C]GGCTGGCTGG	93	20,38	227195	60,27	31	-4.371	.	50.01	.	.	0.851	.	.	.	17	.	1	.	7.74	.	221,6	251,7	0.03	0.03	227	258	108,2	136,4	107,4
chr1	39522547	C	T	INTRON	MODIFIER	BMP8A		chr1	39522547	.	C	T	.	haplotype;map_qual;normal_artifact	.	93	444	2	INTRON(MODIFIER||||BMP8A|protein_coding|CODING|ENST00000331593|5)	AGTGAATCTG[C/T]AGGGAGGACA	93	20,20	228195	60,27	57	-25.68	.	16.63	.	.	1.72	.	.	.	93	.	56	.	30.35	.	200,12	210,14	0.06	0.066	212	224	92,4	115,8	105,8
chr1	39522566	T	TG	INTRON	MODIFIER	RP11-69E11.4		chr1	39522566	.	T	TG	.	haplotype;map_qual;normal_artifact	.	93	379	2	INTRON(MODIFIER||||RP11-69E11.4|antisense|NON_CODING|ENST00000331856|2)	ATAGAATCAT[-/G]GGTGACTTCA	93	32,20	231195	60,27	64	-26.31	.	10.1	.	.	1.74	.	2,3	G	93	STR	93	93	31.53	.	178,12	174,14	0.067	0.079	190	188	76,3	93,8	95,8
chr1	39945550	CG	TA	UPSTREAM	MODIFIER	Y_RNA		chr1	39945550	.	CG	TA	.	weak_evidence	.	93	10	1	UPSTREAM(MODIFIER||552||Y_RNA|misc_RNA|NON_CODING|ENST00000384626|)	CATGCCGCCA[CG/TA]CCTGGCTAAT	21	24,32	268300	60,60	10	1	.	2.71	.	.	6	.	.	.	1	.	19	.	4.2	.	9,0	0,1	0.091	0.667	9	1	1,0	0,0	7,0
chr1	39967822	A	C	NON_SYNONYMOUS_CODING	MODERATE	MFSD2A		chr1	39967822	.	A	C	.	base_qual;strand_bias	.	93	387	1	NON_SYNONYMOUS_CODING(MODERATE|MISSENSE|Atc/Ctc|I372L|MFSD2A|protein_coding|CODING|ENST00000372811|11)	GCCATTTCTC[A/C]TCTTGGTGGC	93	30,14	244219	60,60	41	2.27	.	55.61	.	.	6	.	.	.	65	.	1	.	11.55	.	186,0	167,23	0.005285	0.073	186	190	86,0	93,0	92,0
chr1	40037758	C	A	UPSTREAM	MODIFIER	CAP1		chr1	40037758	.	C	A	.	weak_evidence	.	93	10	1	UPSTREAM(MODIFIER||2991||CAP1|protein_coding|CODING|ENST00000372792|)	TGCTTATCTT[C/A]TAGCAGTTCT	14	29,20	252212	60,60	44	0.954	.	2.4	.	.	6	.	.	.	1	.	44	.	4.47	.	8,0	0,2	0.1	0.75	8	2	3,0	0,0	5,0
chr1	40290870	GT	G	FRAME_SHIFT	HIGH	ZMPSTE24		chr1	40290870	.	GT	G	.	slippage;weak_evidence	.	93	163	1	FRAME_SHIFT(HIGH||tta/|L362|ZMPSTE24|protein_coding|CODING|ENST00000372759|9|INFO_REALIGN_3_PRIME)	CTTTCCTGTG[T/-]TTTTTTTTAT	93	20,27	235243	60,60	43	1.75	.	17.46	.	.	6	.	9,8	T	1	STR	84	1	4.49	.	68,2	80,10	0.018	0.093	70	90	33,0	33,7	35,2
chr1	40317010	T	C	UPSTREAM	MODIFIER	COL9A2		chr1	40317010	.	T	C	.	normal_artifact	.	93	195	1	UPSTREAM(MODIFIER||975||COL9A2|processed_transcript|CODING|ENST00000490132|)	TGTCCTCAGG[T/C]GGCCTCTCGG	93	31,38	235267	60,60	28	-11.94	.	5.87	.	.	6	.	.	.	93	.	15	.	28.78	.	87,5	86,11	0.064	0.121	92	97	56,3	46,4	27,2
chr1	40486715	C	A	UPSTREAM	MODIFIER	ZFP69		chr1	40486715	.	C	A	.	weak_evidence	.	93	11	1	UPSTREAM(MODIFIER||2431||ZFP69|processed_transcript|CODING|ENST00000482712|)	AGCCATCCCA[C/A]CTAGCCCTGA	21	36,30	301298	60,60	37	1.02	.	2.71	.	.	6	.	.	.	1	.	19	.	3.18	.	9,0	0,1	0.088	0.667	9	1	4,0	0,1	5,0
chr1	40909394	TTTA	T	INTERGENIC	MODIFIER			chr1	40909394	.	TTTA	T	.	slippage;weak_evidence	.	93	18	1	INTERGENIC(MODIFIER||||||||)	GCCCGGCCCT[TTA/-]TTATTATTAT	12	34,25	253245	60,60	29	1	.	2.71	.	.	6	.	4,3	TTA	1	STR	43	1	3.31	.	9,0	7,2	0.091	0.273	9	9	4,0	1,2	5,0
chr1	41200165	A	G	INTRON	MODIFIER	SCMH1		chr1	41200165	.	A	G	.	weak_evidence	.	93	11	1	INTRON(MODIFIER||||SCMH1|protein_coding|CODING|ENST00000372596|1)	CATTCCTGGA[A/G]ACCTCACAAT	21	25,38	249225	60,60	65	0.951	.	2.36	.	.	6	.	.	.	1	.	11	.	3.2	.	8,0	2,1	0.101	0.4	8	3	4,0	0,0	3,0
chr1	41513253	T	G	NON_SYNONYMOUS_CODING	MODERATE	HIVEP3		chr1	41513253	.	T	G	.	base_qual;normal_artifact;strand_bias	.	93	402	1	NON_SYNONYMOUS_CODING(MODERATE|MISSENSE|Aac/Cac|N1990H|HIVEP3|protein_coding|CODING|ENST00000372583|8)	GATGAGTCGT[T/G]TTTGGTTAGC	93	34,13	233243	60,60	23	-15.85	.	7.48	.	.	6	.	.	.	93	.	1	.	22.09	.	156,29	174,30	0.106	0.113	185	204	69,4	71,5	75,4
chr1	42410104	G	GGGT	DOWNSTREAM	MODIFIER	RP11-157D18.2		chr1	42410104	.	G	GGGT	.	normal_artifact;slippage	.	93	486	1	DOWNSTREAM(MODIFIER||2293||RP11-157D18.2|processed_pseudogene|NON_CODING|ENST00000411908|)	AGGACATCCG[-/GGT]GGTGGTGGTG	93	20,20	225226	60,60	40	-18.55	.	21.04	.	.	6	.	4,5	GGT	93	STR	93	1	25.59	.	201,16	188,21	0.074	0.092	217	209	91,8	111,6	102,7
chr1	42500418	TC	T	UPSTREAM	MODIFIER	TMSB4XP1		chr1	42500418	.	TC	T	.	normal_artifact;weak_evidence	.	93	343	1	UPSTREAM(MODIFIER||80||TMSB4XP1|processed_pseudogene|NON_CODING|ENST00000424567|)	CGAGTTCTCT[C/-]TTTTTTTTTT	93	20,35	232244	60,60	33	-2.144	.	27.21	.	.	6	.	.	.	1	.	14	.	4.41	.	137,8	145,8	0.041	0.05	145	153	69,7	63,2	63,1
chr1	42536528	AAG	A	UPSTREAM	MODIFIER	CCDC30		chr1	42536528	.	AAG	A	.	normal_artifact;slippage	.	93	380	1	UPSTREAM(MODIFIER||44||CCDC30|retained_intron|CODING|ENST00000514642|)	AGTGGTCAAA[AG/-]AGAGAGAGAG	93	23,20	231224	60,60	27	-7.587	.	27.54	.	.	1.82	.	8,7	AG	18	STR	71	1	8.57	.	170,10	161,11	0.053	0.062	180	172	88,4	71,7	71,5
chr1	42758862	G	T	SYNONYMOUS_CODING	LOW	P3H1		chr1	42758862	.	G	T	.	normal_artifact	.	93	209	1	SYNONYMOUS_CODING(LOW|SILENT|gcC/gcA|A310|P3H1|protein_coding|CODING|ENST00000397054|4)	TGTTATAGTA[G/T]GCAAACTGCA	93	35,30	230211	60,60	46	-3.647	.	16.53	.	.	6	.	.	.	83	.	46	.	13.44	.	95,5	95,8	0.056	0.085	100	103	51,4	51,1	42,1
chr1	42948698	GC	CG	DOWNSTREAM	MODIFIER	SLC2A1		chr1	42948698	.	GC	CG	.	PASS	.	93	12	1	DOWNSTREAM(MODIFIER||2913||SLC2A1|processed_transcript|CODING|ENST00000460369|)	GTAGGCCGAG[GC/CG]GGGCGGATTG	17	20,37	206312	60,60	61	0.954	.	2.41	.	.	6	.	.	.	14	.	16	.	7.52	.	8,0	2,2	0.1	0.5	8	4	2,0	1,0	6,0
chr1	43232407	G	T	INTRON	MODIFIER	EBNA1BP2		chr1	43232407	.	G	T	.	normal_artifact	.	93	110	1	INTRON(MODIFIER||||EBNA1BP2|processed_transcript|CODING|ENST00000466927|1)	GAAATGCCCG[G/T]GTGTCAGGGG	93	37,31	240225	60,60	29	-5.162	.	3.06	.	.	6	.	.	.	4	.	33	.	5.27	.	46,4	50,5	0.085	0.095	50	55	19,3	22,4	26,0
chr1	43273544	G	A	UTR_3_PRIME	MODIFIER	TMEM125		chr1	43273544	.	G	A	.	normal_artifact	.	93	55	1	UTR_3_PRIME(MODIFIER||162||TMEM125|protein_coding|CODING|ENST00000432792|4)	AAGCCCATGT[G/A]TTCCCACACA	57	35,31	273271	60,60	29	-0.9319	.	4.05	.	.	6	.	.	.	80	.	11	.	13.42	.	25,1	22,6	0.071	0.233	26	28	14,0	15,4	11,1
chr1	43276816	G	T	DOWNSTREAM	MODIFIER	TMEM125		chr1	43276816	.	G	T	.	weak_evidence	.	93	43	1	DOWNSTREAM(MODIFIER||2814||TMEM125|protein_coding|CODING|ENST00000432792|)	GCAAAAGACA[G/T]CCTCCTCTCT	93	37,26	249267	60,60	26	1.34	.	6.23	.	.	6	.	.	.	1	.	7	.	3.26	.	21,0	20,2	0.044	0.124	21	22	12,0	13,2	7,0
chr1	43305286	G	A	NON_SYNONYMOUS_CODING	MODERATE	TIE1		chr1	43305286	.	G	A	.	normal_artifact	.	93	653	1	NON_SYNONYMOUS_CODING(MODERATE|MISSENSE|Gta/Ata|V143I|TIE1|protein_coding|CODING|ENST00000372476|3)	TGACACCGCT[G/A]TACTTTCTGC	93	35,31	238248	60,60	37	-32.62	.	31.4	.	.	6	.	.	.	93	.	93	.	38.44	.	307,20	281,28	0.063	0.087	327	309	155,14	149,12	147,6
chr1	43314053	TTGTG	T,TTG,TTGTGTG	UPSTREAM	MODIFIER	TIE1		chr1	43314053	.	TTGTG	T,TTG,TTGTGTG	.	germline;multiallelic;normal_artifact	.	93	487	1	UPSTREAM(MODIFIER||3876||TIE1|processed_transcript|CODING|ENST00000492599|)	TTGTACACCT[TGTG/-]TGTGTGTGTG	1	33,20,22,34	235235227252	60,60,60,60	41,41,40	-3.088e+00,-2.671e+01,-2.239e+01	.	35.68,-4.568e+00,6.37	.	.	3.71,1.96,1.62	.	11,9,10,12	TG	93	STR	93	93	7.61,72.08,16.35	.	140,4,21,18	118,7,45,13	0.024,0.108,0.095	0.038,0.232,0.072	183	183	64,1,8,12	61,4,23,4	66,3,11,6
chr1	43326829	AT	A	DOWNSTREAM	MODIFIER	TIE1		chr1	43326829	.	AT	A	.	germline;slippage;weak_evidence	.	93	13	1	DOWNSTREAM(MODIFIER||3722||TIE1|protein_coding|CODING|ENST00000372476|)	ATTTTTTGTA[T/-]TTTTTTTAGT	1	20,28	226249	60,60	28	0.986	.	2.48	.	.	3.57	.	8,7	T	1	STR	16	1	4.73	.	9,0	2,2	0.094	0.527	9	4	3,0	0,0	5,0
chr1	43387456	TA	T	UPSTREAM	MODIFIER	SZT2		chr1	43387456	.	TA	T	.	normal_artifact	.	93	150	1	UPSTREAM(MODIFIER||2425||SZT2|protein_coding|CODING|ENST00000372450|)	AAAGAAGCCT[A/-]AAAAACCCCT	58	32,20	234222	60,60	28	-4.344	.	5.13	.	.	6	.	6,5	A	93	STR	93	93	18.78	.	58,6	53,23	0.092	0.286	64	76	18,1	21,11	37,5
chr1	43389881	C	T	UPSTREAM	MODIFIER	MED8		chr1	43389881	.	C	T	.	normal_artifact	.	93	399	1	UPSTREAM(MODIFIER||97||MED8|protein_coding|CODING|ENST00000372455|)	CACCAACTTC[C/T]GGTTCCTGCT	93	29,32	236256	60,60	23	-10.32	.	32.11	.	.	6	.	.	.	93	.	51	.	28.26	.	182,7	183,18	0.041	0.09	189	201	93,4	92,12	87,3
chr1	43453563	A	C	UPSTREAM	MODIFIER	HYI-AS1		chr1	43453563	.	A	C	.	base_qual;normal_artifact;strand_bias;weak_evidence	.	93	310	1	UPSTREAM(MODIFIER||364||HYI-AS1|antisense|NON_CODING|ENST00000444386|)	GGCACCCCCC[A/C]GCCCTCCCAG	93	32,11	238237	60,60	6	-2.066	.	20.13	.	.	6	.	.	.	1	.	1	.	4.22	.	148,13	128,9	0.059	0.053	161	137	72,3	57,2	58,2
chr1	43701202	A	C	UPSTREAM	MODIFIER	ST3GAL3		chr1	43701202	.	A	C	.	weak_evidence	.	93	15	1	UPSTREAM(MODIFIER||4622||ST3GAL3|nonsense_mediated_decay|CODING|ENST00000532911|)	TACAGGCATG[A/C]GCCACCACGC	25	31,20	236160	60,60	10	1.04	.	3	.	.	6	.	.	.	1	.	32	.	3.17	.	10,0	3,2	0.083	0.427	10	5	4,0	2,2	6,0
chr1	43702790	G	A	UPSTREAM	MODIFIER	ST3GAL3		chr1	43702790	.	G	A	.	weak_evidence	.	93	45	1	UPSTREAM(MODIFIER||4757||ST3GAL3|protein_coding|CODING|ENST00000361392|)	CACCACTTTG[G/A]CAAGCCGAGG	92	37,31	262257	60,60	72	1.37	.	6.31	.	.	6	.	.	.	1	.	8	.	3.55	.	21,0	18,2	0.041	0.136	21	20	11,0	9,1	10,0
chr1	43838114	CAAA	C,CA,CAA,CAAAA	UPSTREAM	MODIFIER	MIR6079		chr1	43838114	.	CAAA	C,CA,CAA,CAAAA	.	germline;multiallelic;normal_artifact	.	93	165	1	UPSTREAM(MODIFIER||507||MIR6079|miRNA|NON_CODING|ENST00000635807|)	ACTCCGTCTC[AAA/-]AAAAAAAAAA	1	25,37,37,37,37	230233214233243	60,60,60,60,60	42,39,30,39	-6.330e+00,-1.706e+01,-3.696e+01,-1.533e+00	.	-2.174e+01,-4.537e+01,-5.589e+01,9.54	.	.	6.00,6.00,6.00,6.00	.	16,13,14,15,17	A	93	STR	93	93	3.16,50.50,4.56,5.56	.	12,6,19,24,4	16,8,40,10,9	0.095,0.268,0.399,0.062	0.079,0.500,0.105,0.109	65	83	3,1,10,12,0	2,5,20,3,3	7,5,8,9,4
chr1	43879318	CT	C	INTRON	MODIFIER	ST3GAL3		chr1	43879318	.	CT	C	.	normal_artifact;slippage	.	93	178	1	INTRON(MODIFIER||||ST3GAL3|protein_coding|CODING|ENST00000361392|5|INFO_REALIGN_3_PRIME)	GTGGTTTGGC[T/-]TTTTTTTGGA	84	37,20	240229	60,60	26	-7.567	.	2.74	.	.	4.61	.	8,7	T	65	STR	93	1	12.36	.	69,9	73,17	0.108	0.169	78	90	28,5	34,7	40,4
chr1	43929962	T	C	UPSTREAM	MODIFIER	ARTN		chr1	43929962	.	T	C	.	PASS	.	93	260	1	UPSTREAM(MODIFIER||3358||ARTN|protein_coding|CODING|ENST00000372359|)	GTGGCACTCC[T/C]AGAGCAGGGT	93	31,37	245181	60,60	24	2.13	.	39.52	.	.	6	.	.	.	47	.	27	.	9.92	.	132,0	114,6	0.007408	0.056	132	120	53,0	60,5	73,0
chr1	43958502	G	A	SYNONYMOUS_CODING	LOW	IPO13		chr1	43958502	.	G	A	.	normal_artifact	.	93	395	2	SYNONYMOUS_CODING(LOW|SILENT|ctG/ctA|L597|IPO13|protein_coding|CODING|ENST00000372343|10)	TGGGCTTCCT[G/A]CTGTCAGCTC	93	20,31	237220	60,60	42	-4.302	.	44.74	.	.	6	.	.	.	34	.	31	.	8.78	.	200,6	170,7	0.029	0.044	206	177	100,3	88,4	95,2
chr1	43958547	G	A	SYNONYMOUS_CODING	LOW	IPO13		chr1	43958547	.	G	A	.	normal_artifact	.	93	298	2	SYNONYMOUS_CODING(LOW|SILENT|tcG/tcA|S612|IPO13|protein_coding|CODING|ENST00000372343|10)	ACCTGCACTC[G/A]CTTATCTCAC	93	36,31	240215	60,60	34	-21.14	.	4.1	.	.	6	.	.	.	93	.	81	.	26.73	.	139,13	120,16	0.089	0.122	152	136	73,7	59,8	63,6
chr1	43966577	T	A	SYNONYMOUS_CODING	LOW	IPO13		chr1	43966577	.	T	A	.	normal_artifact	.	93	524	1	SYNONYMOUS_CODING(LOW|SILENT|gcT/gcA|A800|IPO13|protein_coding|CODING|ENST00000372343|16)	TCCTGCAGGC[T/A]CTGAAGCGGA	93	33,26	232239	60,60	36	-37.25	.	4.8	.	.	6	.	.	.	93	.	93	.	42.58	.	234,24	225,28	0.091	0.107	258	253	121,12	109,15	109,10
chr1	43981334	TAGC	T	UPSTREAM	MODIFIER	B4GALT2		chr1	43981334	.	TAGC	T	.	normal_artifact;slippage;weak_evidence	.	93	517	1	UPSTREAM(MODIFIER||3530||B4GALT2|processed_transcript|CODING|ENST00000481924|)	CCCAGCTGCT[AGC/-]AGCAGCAGCA	93	20,31	233218	60,60	28	-4.467	.	43.91	.	.	3.91	.	7,6	AGC	1	STR	44	1	3.35	.	191,4	224,5	0.024	0.024	195	229	88,1	90,2	78,3
chr1	44001729	CT	C	INTRON	MODIFIER	SLC6A9		chr1	44001729	.	CT	C	.	normal_artifact;slippage	.	93	129	1	INTRON(MODIFIER||||SLC6A9|protein_coding|CODING|ENST00000360584|8)	CCCCCAACTC[T/-]TTTTTTTTGG	42	37,37	248272	60,60	36	-5.165	.	3.55	.	.	3.61	.	9,8	T	93	STR	85	1	17.92	.	49,4	46,13	0.091	0.22	53	59	21,2	20,8	25,2
chr1	44011068	C	T	DOWNSTREAM	MODIFIER	SLC6A9		chr1	44011068	.	C	T	.	normal_artifact	.	93	59	1	DOWNSTREAM(MODIFIER||3562||SLC6A9|processed_transcript|CODING|ENST00000533007|)	TGCCAGAGGG[C/T]GCCAAGCAGA	48	30,33	298281	60,60	13	-3.39	.	2.27	.	.	6	.	.	.	16	.	8	.	6.87	.	31,2	19,3	0.085	0.166	33	22	17,1	6,2	14,1
chr1	44118835	A	C	UPSTREAM	MODIFIER	KLF17		chr1	44118835	.	A	C	.	haplotype;normal_artifact;strand_bias	.	93	241	2	UPSTREAM(MODIFIER||15||KLF17|protein_coding|CODING|ENST00000372299|)	CGATGTACCG[A/C]TACCCGCCTG	93	32,32	244226	60,60	47	-1.113	.	27.6	.	.	6	.	.	.	93	.	1	.	44.79	.	120,4	98,16	0.032	0.146	124	114	58,0	27,13	55,0
chr1	44118837	A	C	UPSTREAM	MODIFIER	KLF17		chr1	44118837	.	A	C	.	haplotype;normal_artifact;strand_bias	.	93	243	2	UPSTREAM(MODIFIER||13||KLF17|protein_coding|CODING|ENST00000372299|)	ATGTACCGAT[A/C]CCCGCCTGCG	93	31,27	244226	60,60	45	-1.11	.	27.59	.	.	6	.	.	.	93	.	1	.	44.79	.	120,4	98,16	0.032	0.146	124	114	63,1	34,11	53,0
chr1	44122597	T	G	UPSTREAM	MODIFIER	RP11-570P14.1		chr1	44122597	.	T	G	.	base_qual;normal_artifact;strand_bias;weak_evidence	.	93	326	1	UPSTREAM(MODIFIER||85||RP11-570P14.1|processed_pseudogene|NON_CODING|ENST00000402743|)	GAATGGCCGT[T/G]TTTGGTTTTT	93	33,13	230201	60,60	29	2.08	.	40.11	.	.	6	.	.	.	1	.	1	.	3.95	.	156,8	146,12	0.008467	0.045	164	158	62,0	62,4	68,0
chr1	44132103	T	C	DOWNSTREAM	MODIFIER	KLF17		chr1	44132103	.	T	C	.	weak_evidence	.	93	12	1	DOWNSTREAM(MODIFIER||1387||KLF17|nonsense_mediated_decay|CODING|ENST00000476802|)	TCAGGAGTCT[T/C]GAGACTAGCC	25	24,37	216258	60,60	57	1	.	2.7	.	.	6	.	.	.	1	.	11	.	3.1	.	9,0	2,1	0.091	0.4	9	3	6,0	0,0	3,0
chr1	44339164	C	T	NON_SYNONYMOUS_CODING	MODERATE	ERI3		chr1	44339164	.	C	T	.	normal_artifact	.	93	253	1	NON_SYNONYMOUS_CODING(MODERATE|MISSENSE|Gcg/Acg|A124T|ERI3|protein_coding|CODING|ENST00000372257|3)	CCGTGGGCCG[C/T]CAGCTTTCTG	93	37,20	235232	60,60	50	-6.449	.	11.62	.	.	6	.	.	.	93	.	93	.	44.06	.	96,8	113,24	0.077	0.179	104	137	42,1	62,10	50,6
chr1	44488498	A	G	INTRON	MODIFIER	RNF220		chr1	44488498	.	A	G	.	germline;weak_evidence	.	93	16	1	INTRON(MODIFIER||||RNF220|protein_coding|CODING|ENST00000355387|2)	TATTTTTACT[A/G]GAGATGGGGT	1	25,20	209230	60,60	55	0.97	.	2.35	.	.	1.31	.	.	.	2	.	36	.	5.84	.	8,0	4,3	0.097	0.441	8	7	4,0	2,0	3,0
chr1	44622741	G	A	SPLICE_SITE_ACCEPTOR	HIGH	RNF220		chr1	44622741	.	G	A	.	normal_artifact	.	93	273	1	SPLICE_SITE_ACCEPTOR(HIGH||||RNF220|protein_coding|CODING|ENST00000355387|3)	TTTCTTGGCA[G/A]CAAGAATTCC	93	20,20	229218	60,60	41	-7.675	.	15.03	.	.	6	.	.	.	93	.	89	.	45.63	.	111,7	127,25	0.065	0.166	118	152	34,2	71,15	76,5
chr1	44786247	TG	T	INTRON	MODIFIER	BEST4		chr1	44786247	.	TG	T	.	normal_artifact	.	93	433	1	INTRON(MODIFIER||||BEST4|protein_coding|CODING|ENST00000372207|3)	TAAAGCAGGT[G/-]GGGTGCAGTT	93	31,21	244236	60,60	30	-7.281	.	34.55	.	.	6	.	4,3	G	86	STR	53	93	14.37	.	194,11	185,15	0.045	0.068	205	200	94,6	77,8	97,5
chr1	44978230	CA	C	INTRON	MODIFIER	EIF2B3		chr1	44978230	.	CA	C	.	slippage;weak_evidence	.	93	107	1	INTRON(MODIFIER||||EIF2B3|protein_coding|CODING|ENST00000360403|3)	GTTCTGTCTC[A/-]AAAAAAAGAC	93	37,38	246254	60,60	17	1.7	.	14.29	.	.	6	.	8,7	A	1	STR	5	1	5.04	.	48,0	50,4	0.02	0.09	48	54	26,0	29,3	22,0
chr1	45008540	G	A	STOP_GAINED	HIGH	HECTD3		chr1	45008540	.	G	A	.	normal_artifact	.	93	251	1	STOP_GAINED(HIGH|NONSENSE|Cag/Tag|Q412*|HECTD3|protein_coding|CODING|ENST00000372172|8)	AGCCACCTCT[G/A]CAGGAGGACA	93	37,25	246221	60,60	44	-3.14	.	24.53	.	.	6	.	.	.	93	.	51	.	18.16	.	118,4	110,12	0.039	0.104	122	122	55,1	44,3	62,3
chr1	45337957	GA	G	UPSTREAM	MODIFIER	TOE1		chr1	45337957	.	GA	G	.	slippage;weak_evidence	.	93	25	1	UPSTREAM(MODIFIER||1712||TOE1|protein_coding|CODING|ENST00000372090|)	CCAAGAGGGG[A/-]AAAAAAAGAG	42	38,38	279288	60,60	28	1.08	.	3.31	.	.	6	.	8,7	A	1	STR	9	1	3.01	.	11,0	12,2	0.077	0.187	11	14	6,0	4,2	5,0
[truncated: 15,093 more rows]
[truncated: 29 more columns]
