# Supplementary material for: Discovery of a molecular glue promoting CDK12-DDB1 interaction to trigger cyclin K degradation
Source: eLife. 2020 Aug 17;9:e59994. doi: 10.7554/eLife.59994 (PMC7462607; doi:10.7554/eLife.59994)
Supplement: Figure 5—source data 1. [file elife-59994-fig5-data1.xlsx]

## Sheet: Figure 5A source data
	AlphaScreen
HQ461 (M)	WT			G731E			G731R			WT + 5 µM THZ531
0	2562	1540	1246	1143	1312	1087	1387	986	863	1187	955	937
2.74e-08	2625	1724	1469	1248	1124	1169	1124	1117	796	1128	949	821
8.23e-08	2916	2037	1777	1304	1157	1110	1162	1262	828	1054	1033	906
2.47e-07	4781	3382	3265	1234	1107	1145	1123	959	996	1065	1007	926
7.41e-07	7377	5649	5718	1137	1171	1109	1008	1006	1085	1120	993	799
2.22e-06	11213	9188	8788	1248	1240	1185	1045	1023	975	1078	1062	921
6.67e-06	16665	12816	13014	1251	1198	1100	1107	1087	1018	1168	926	865
2e-05	20710	15836	15276	1233	1200	1143	1057	1369	1206	1307	1119	970
Figure 5-Source Data 1. Detection of HQ461-dependent interaction between FLAG-Avi-DDB1 and His-CDK12KD/His-CCNKΔC examined in an AlphaScreen assay (Source data for Figure 5A).
