# Supplementary material for: Discovery of a molecular glue promoting CDK12-DDB1 interaction to trigger cyclin K degradation
Source: eLife journal article supplement (doi:10.7554/elife.59994), 2020-08-17
Supplement: supp [file elife-59994-supp-v1.zip]

# Figure 1—figure supplement 1

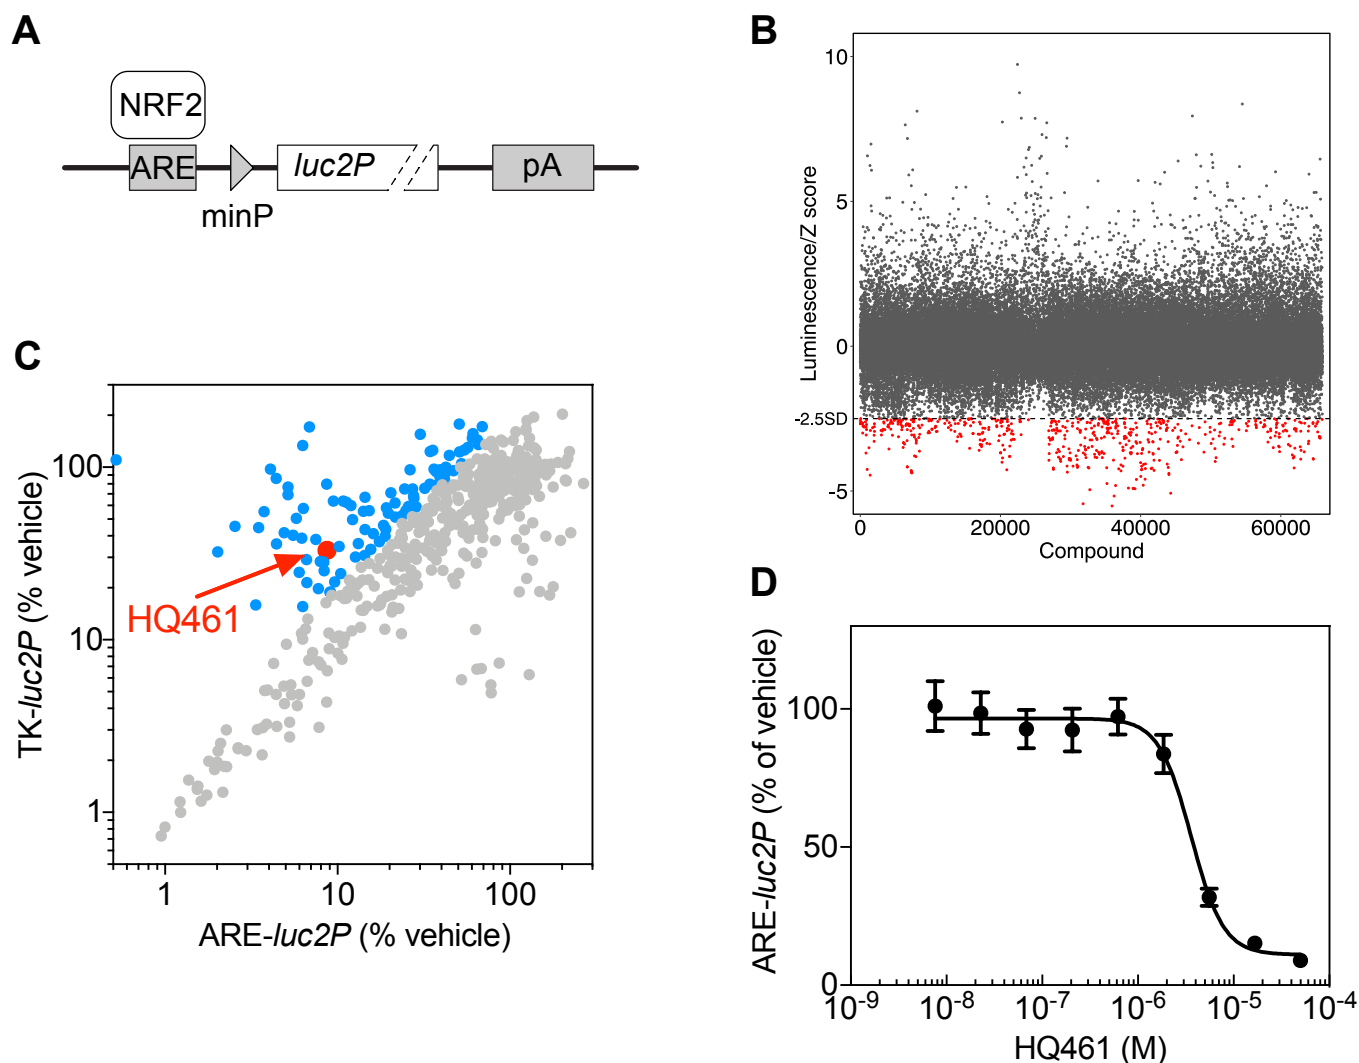

**Figure 1—figure supplement 1. High-throughput chemical screening of NRF2 inhibitors.**

(A) ARE-*luc2P* reporter used for high-throughput screening. NRF2 binds to anti-oxidant response elements (ARE) to drive luciferase (*luc2P*) expression.

(B) Primary screen results. The ARE-*luc2P* reporter cell line was treated for 12 hours with library compounds at 10  $\mu$ M. Each screening plate was individually Z-score normalized, and all the Z-scores were aggregated. The dotted line represents the cutoff (Z-score < -2.5). Red dots mark hits from the primary screen.

(C) Counter screen results. Hits from the primary screen were tested in both ARE-*luc2P* and TK-*luc2P* reporter cell lines at 10  $\mu$ M for 12 hours. Blue dots represent compounds selectively inhibiting ARE-*luc2P* relative to TK-*luc2P*.

(D) Measurement of the HQ461  $IC_{50}$  on ARE-*luc2P* activity ( $IC_{50}$ =3.6  $\mu$ M, 95% CI: 2.9  $\mu$ M-4.5  $\mu$ M). Error bars represent standard errors of the mean (SEM) from three biological replicates.
