# Supplementary material for: Discovery of a molecular glue promoting CDK12-DDB1 interaction to trigger cyclin K degradation
Source: eLife journal article supplement (doi:10.7554/elife.59994), 2020-08-17
Supplement: supp [file elife-59994-supp-v1.zip]

**Figure 6—figure supplement 1**

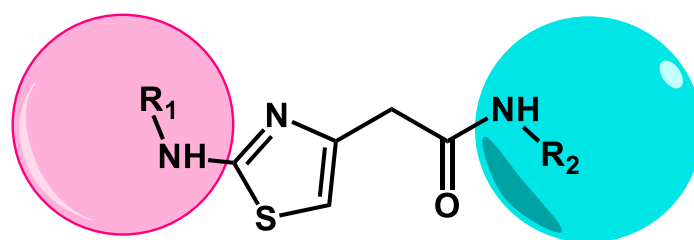

| ID    | R1 | R2 | Dmax (10 $\mu$ M) | ID    | R1 | R2 | Dmax (10 $\mu$ M) |
|-------|----|----|-------------------|-------|----|----|-------------------|
| HQ461 |    |    | 86.0%             | HQ005 |    |    | 86.5%             |
| HQ012 |    |    | NA                | HQ018 |    |    | 18.8%             |
| HQ013 |    |    | 8.6%              | HQ019 |    |    | 62.0%             |
| HQ014 |    |    | 9.9%              | HQ020 |    |    | 15.5%             |
| HQ015 |    |    | 8.6%              | HQ021 |    |    | 7.8%              |
| HQ016 |    |    | NA                | HQ022 |    |    | 25.7%             |
| HQ017 |    |    | 4.2%              | HQ023 |    |    | 3.0 %             |

**Figure 6—figure supplement 1. Structure-activity relationship of HQ461 analogs.** Dmax represents the percentage of CCNK degradation with 10  $\mu$ M of test compound treatment relative to DMSO control. CCNK degradation was measured using a CCNK-*luc* reporter.
