# Supplementary material for: Discovery of a molecular glue promoting CDK12-DDB1 interaction to trigger cyclin K degradation
Source: eLife journal article supplement (doi:10.7554/elife.59994), 2020-08-17
Supplement: supp [file elife-59994-supp-v1.zip]

# Figure 5—figure supplement 1

**A**

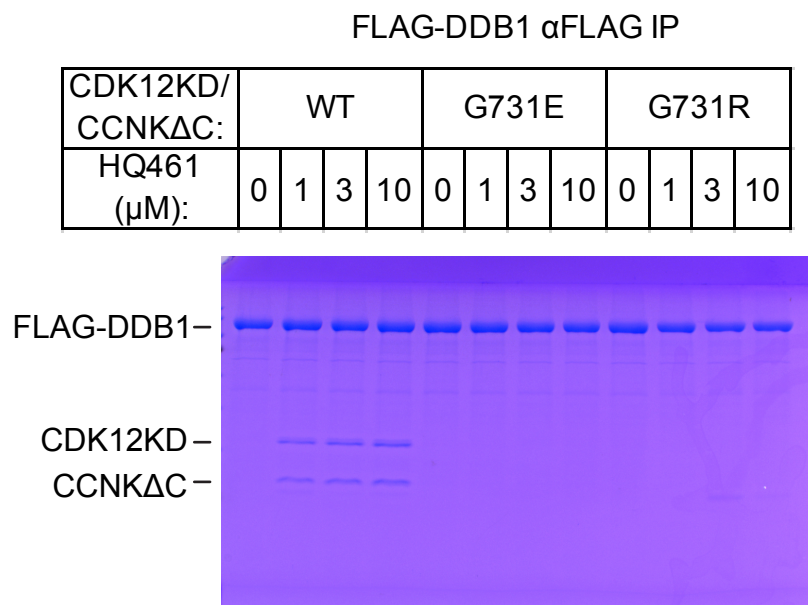

**B**

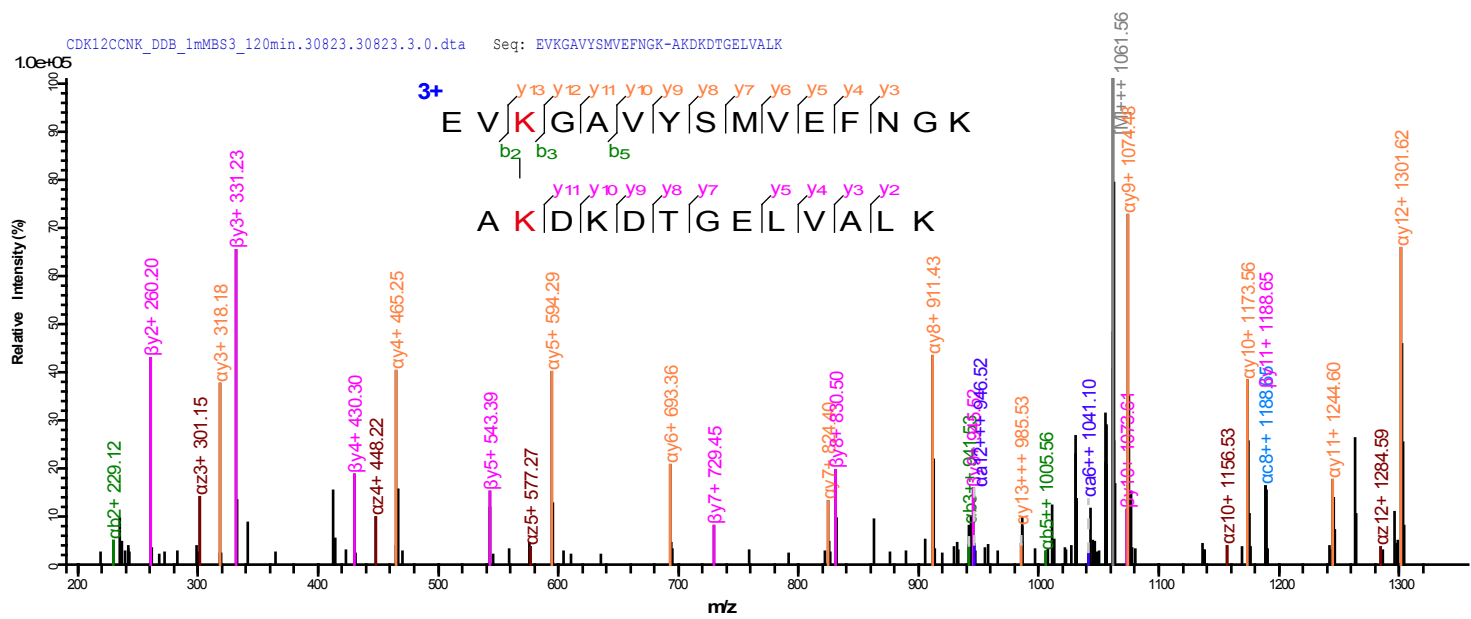

**Figure 5—figure supplement 1. Biochemical characterization of HQ461’s molecular-glue activity.**  
(A) HQ461-dependent formation of a FLAG-DDB1/CDK12KD/CCNKΔC complex visualized by SDS-PAGE followed by coomassie blue staining.  
(B) Annotated MS/MS spectrum of the linked peptide pair from CDK12 and DDB1.
