# Supplementary material for: Discovery of a molecular glue promoting CDK12-DDB1 interaction to trigger cyclin K degradation
Source: eLife journal article supplement (doi:10.7554/elife.59994), 2020-08-17
Supplement: supp [file elife-59994-supp-v1.zip]

Figure 3—figure supplement 1

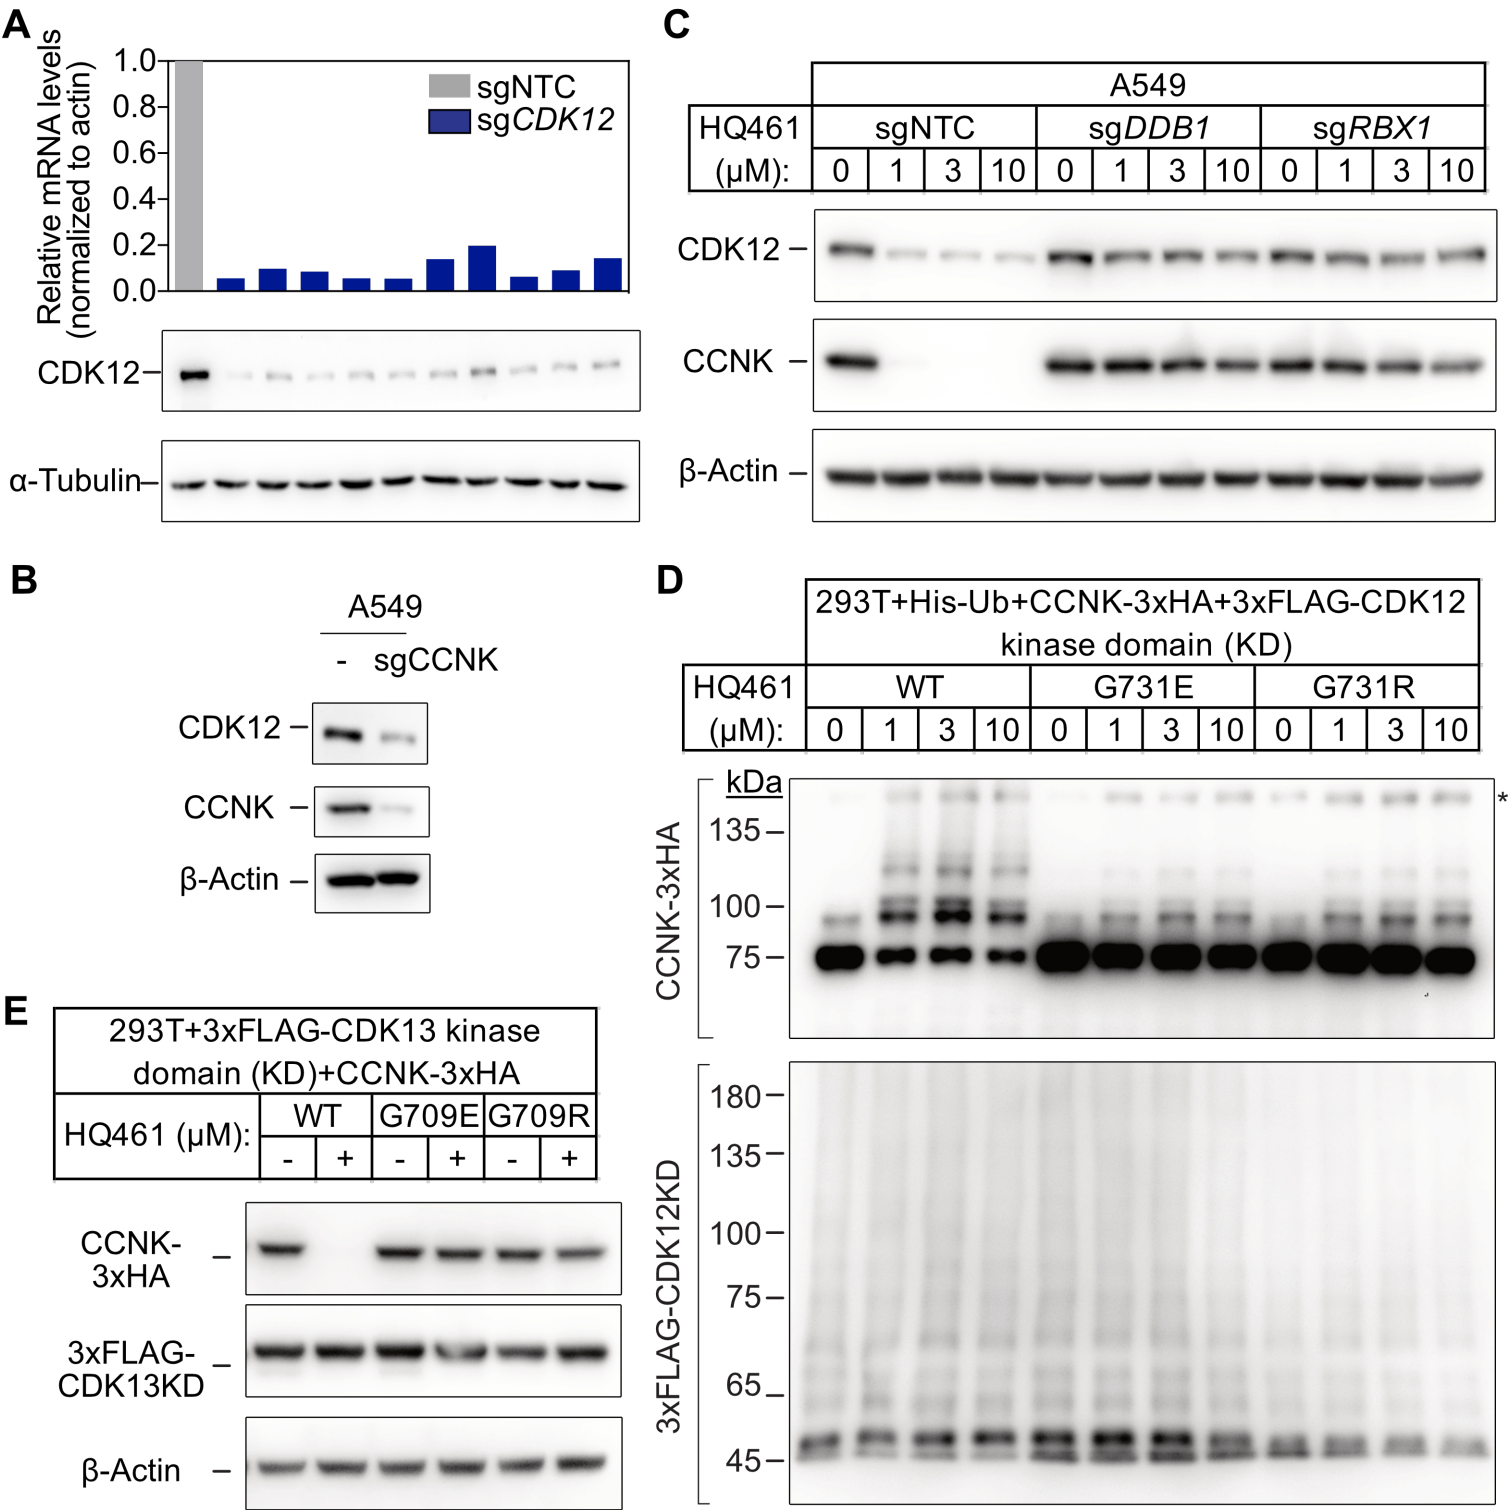

**Figure 3—figure supplement 1. Both CDK12 and CDK13 support HQ461-induced CCNK degradation.**

(A) Measurements of CDK12 mRNA and protein levels in A549 cells following CDK12 CRISPRi.  
(B) Effect of CCNK depletion on CDK12 protein level in A549 cells.  
(C) Effect of DDB1 and RBX1 depletion on CCNK and CDK12 protein levels in A549 cells treated with HQ461.  
(D) HQ461 triggers *in vivo* polyubiquitination of CCNK in complex with the wild-type CDK12 kinase domain but not with G731E or G731R mutant kinase domains. The asterisk indicates a non-specific band.  
(E) Wild-type CDK13 kinase domain but not G709E or G709R mutant kinase domain is sufficient for mediating HQ461-dependent degradation of CCNK.
