# Supplementary material for: Discovery of a molecular glue promoting CDK12-DDB1 interaction to trigger cyclin K degradation
Source: eLife journal article supplement (doi:10.7554/elife.59994), 2020-08-17
Supplement: supp [file elife-59994-supp-v1.zip]

Figure 1—figure supplement 2

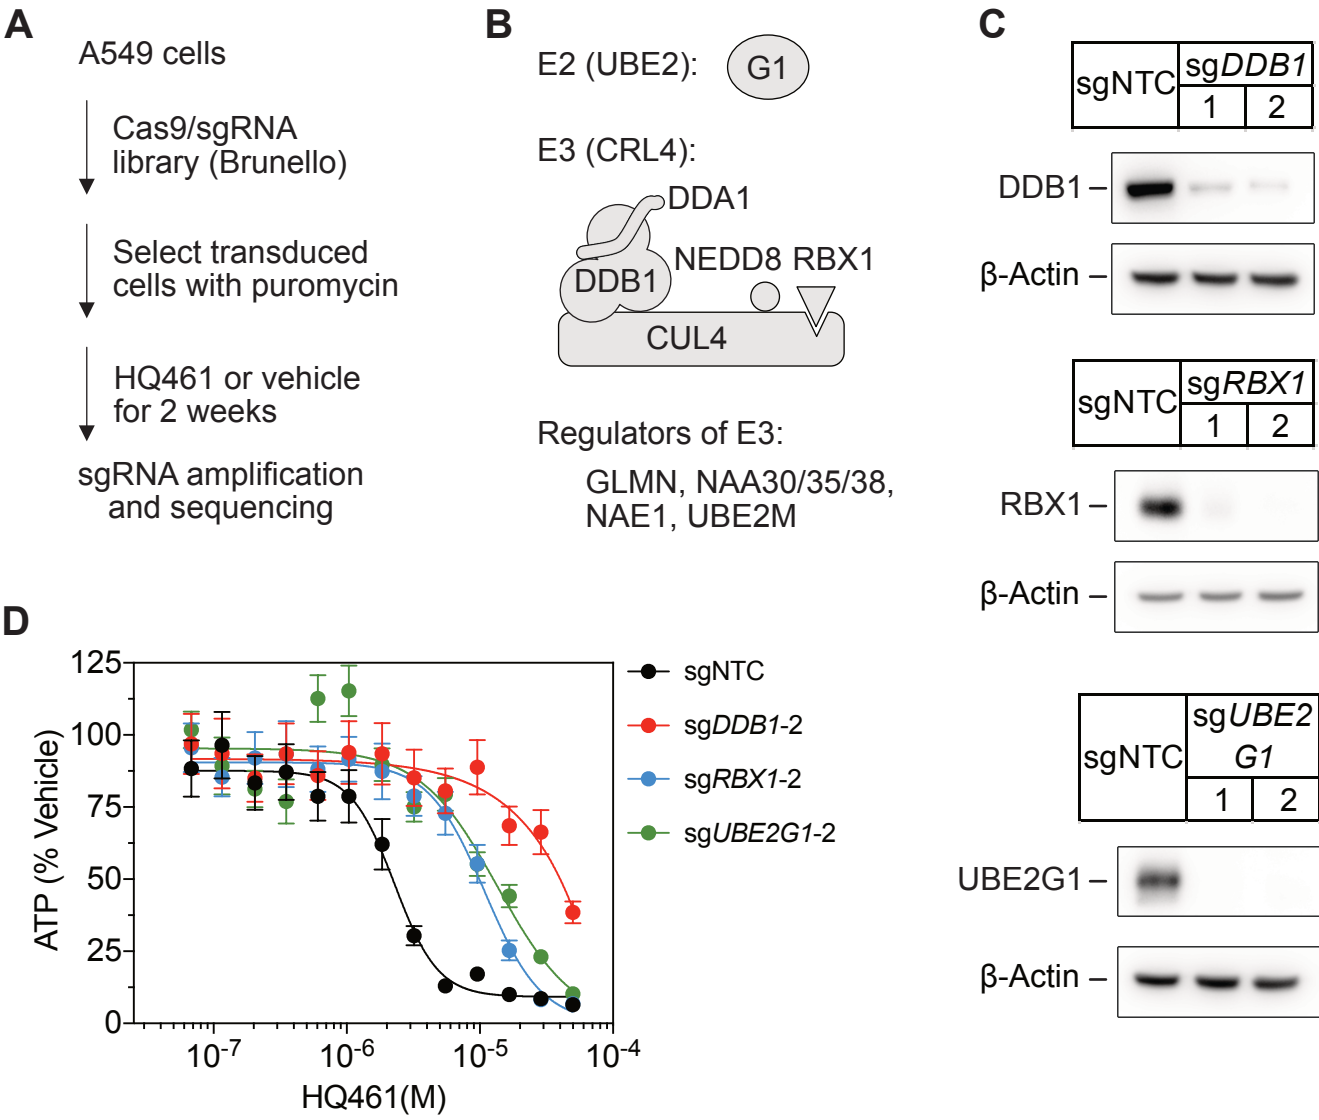

**Figure 1—figure supplement 2. CRISPR-Cas9 screening for HQ461 resistance.**

(A) Genome-wide CRISPR-Cas9 screening procedures.

(B) Classification of top-ranking genes into functional categories in the ubiquitin-proteasome system.

(C) Verification of successful depletion of DDB1, RBX1, and UBE2G1 by individual sgRNAs.

(D) Measurement of the HQ461  $IC_{50}$  on the viability of A549 cells expressing sgRNAs targeting *DDB1* ( $IC_{50}$  > 28.8  $\mu$ M), *RBX1* ( $IC_{50}$  = 11.0  $\mu$ M, 95% CI: 9.1  $\mu$ M-14.2  $\mu$ M), or *UBE2G1* ( $IC_{50}$  = 13.6  $\mu$ M, 95% CI: 5.0  $\mu$ M-50  $\mu$ M) that are independent of the sgRNAs used for the experiments presented in Figure 1D. Error bars represent SEM from three biological replicates.
