# Supplementary material for: Discovery of a molecular glue promoting CDK12-DDB1 interaction to trigger cyclin K degradation
Source: eLife journal article supplement (doi:10.7554/elife.59994), 2020-08-17
Supplement: supp [file elife-59994-supp-v1.zip]

Figure 5—figure supplement 2

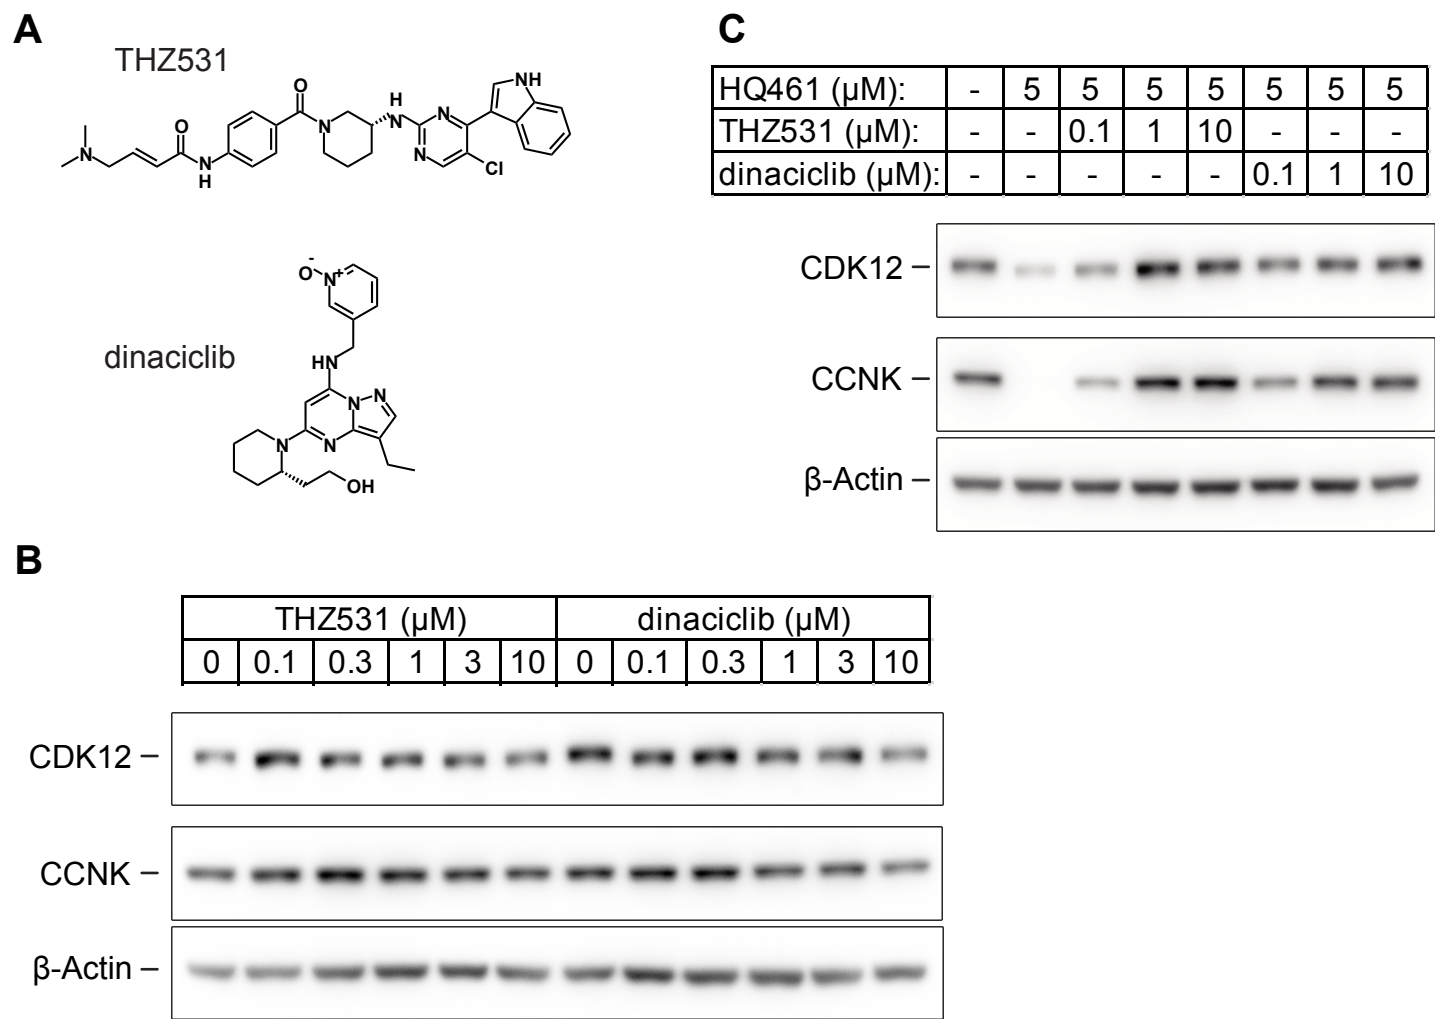

**Figure 5—figure supplement 2. HQ461 binds to the ATP-binding pocket of CDK12.**  
(A) Chemical structures of THZ531 and dinaciclib.  
(B) Effect of THZ531 and dinaciclib on CCNK and CDK12 protein levels in A549 cells.  
(C) Effect of THZ531 and dinaciclib on CCNK and CDK12 protein levels in A549 cells treated with HQ461.
