# Supplementary material for: Discovery of a molecular glue promoting CDK12-DDB1 interaction to trigger cyclin K degradation
Source: eLife journal article supplement (doi:10.7554/elife.59994), 2020-08-17
Supplement: supp [file elife-59994-supp-v1.zip]

## Figure 4—figure supplement 1

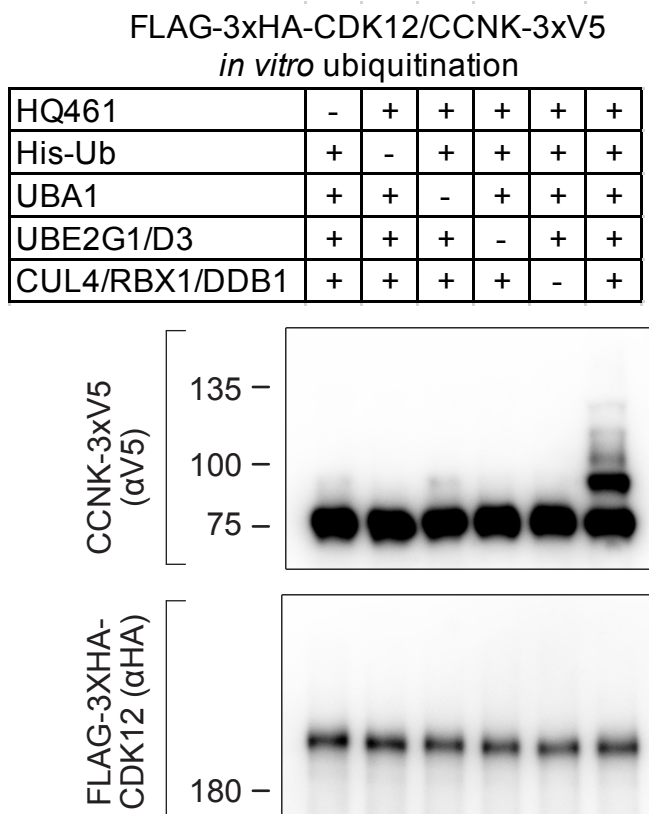

**Figure 4—figure supplement 1. *In vitro* polyubiquitination of CDK12/CCNK.**

The essentiality of each component for the *in vitro* polyubiquitination of CDK12/CCNK is demonstrated with the “all-minus-one” experiment.
