# Supplementary material for: Discovery of a molecular glue promoting CDK12-DDB1 interaction to trigger cyclin K degradation
Source: eLife journal article supplement (doi:10.7554/elife.59994), 2020-08-17
Supplement: supp [file elife-59994-supp-v1.zip]

## Figure 6—figure supplement 2

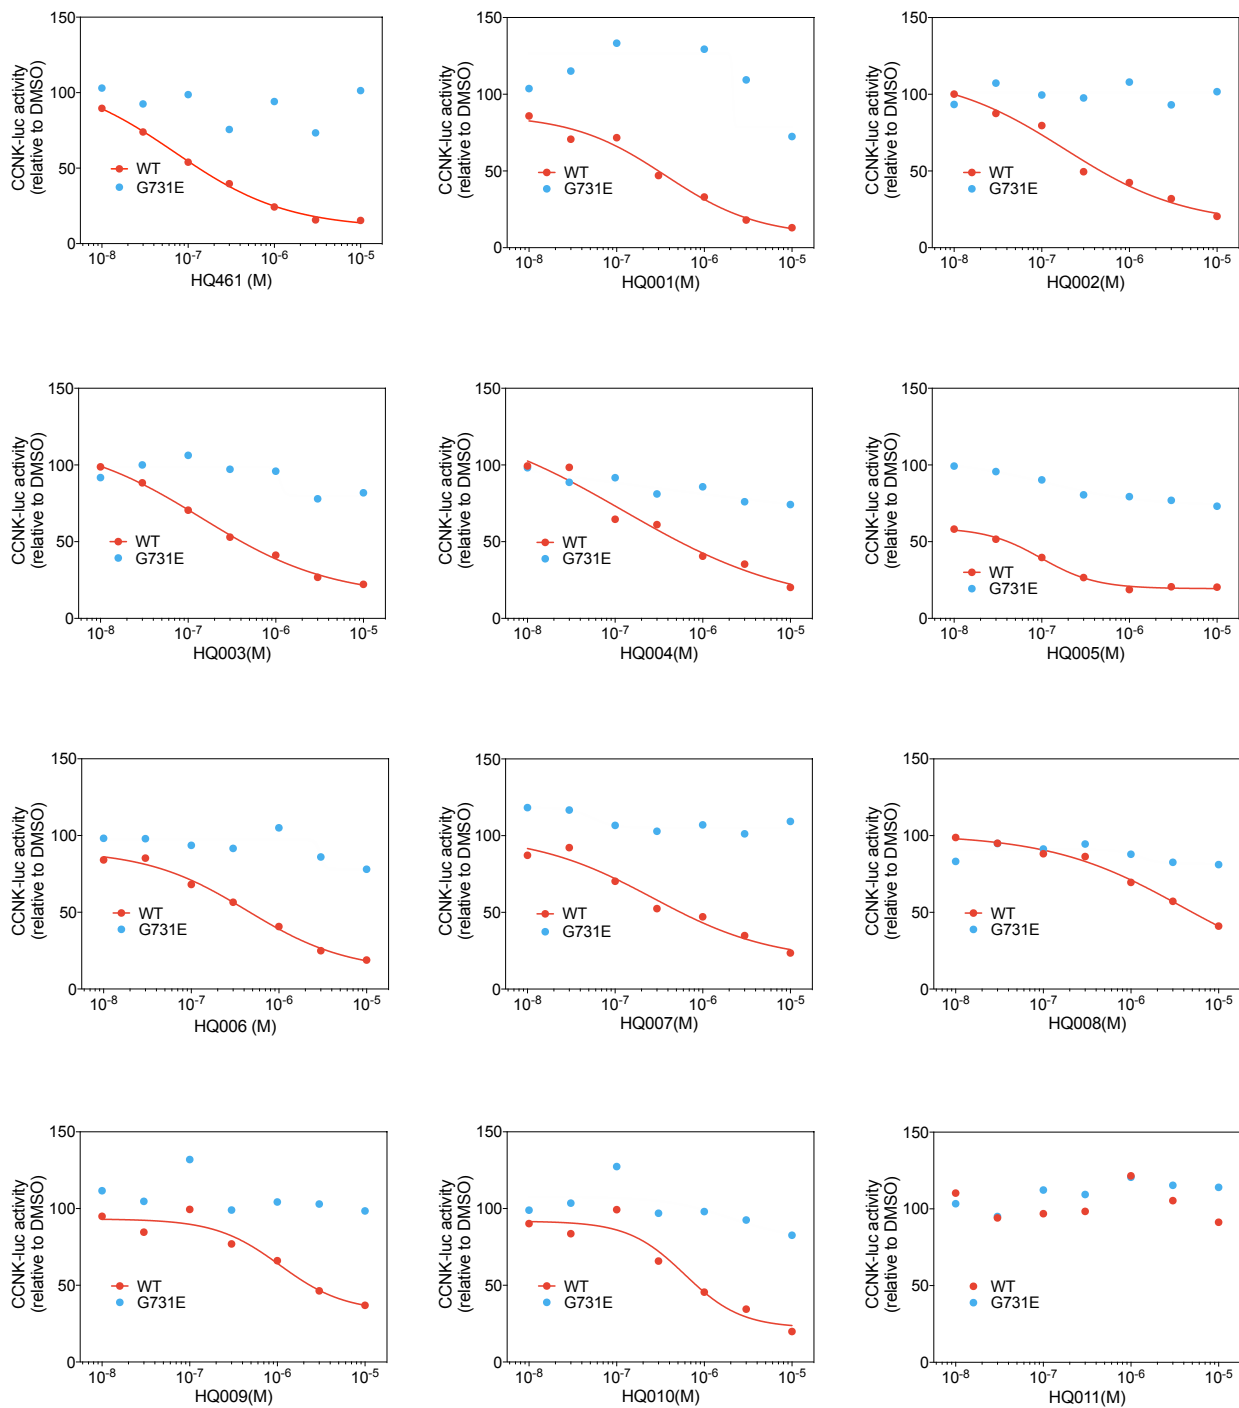

**Figure 6—figure supplement 2. Dose response curves of HQ461 analogs in reducing *CCNK-luc* activity.** The *CCNK-luc* reporter co-transfected with CDK12KD with the G731E mutation verifies that *CCNK-luc* degradation is on-target.
